# Supplementary material for: The Induction of the Isoflavone Biosynthesis Pathway Is Associated with Resistance to Common Bacterial Blight in Phaseolus vulgaris L
Source: MDPI journal article supplement (doi:10.3390/metabo11070433), 2021-07-01

**Table S1. Metrics for transcripts generated by Illumina sequencing mapping to the *P. vulgaris* genome.** Transcript mapping is for mRNA libraries from CBB-susceptible and CBB-resistant RIL plant leaves sampled post-inoculation (PI) with water (mock) and *X. axonopodis* (*Xap*).

| RIL                    | Treatment  | PI (h) | Raw reads             | Trimmed reads         | Total mappings       | Single mappings      | Multi mappings       | Alignment (%)   | Transcripts       |
|------------------------|------------|--------|-----------------------|-----------------------|----------------------|----------------------|----------------------|-----------------|-------------------|
| <b>CBB-susceptible</b> | Mock       | 0      | 89002269<br>(±6.3%)   | 88980236<br>(±6.3%)   | 70938331<br>(±6.0%)  | 61690532<br>(±6.1%)  | 92477798<br>(±6.8%)  | 79.8<br>(±0.4%) | 44182<br>(±0.7%)  |
|                        | Mock       | 8      | 98043419<br>(±6.2%)   | 98018530<br>(±6.2%)   | 77433697<br>(±5.8%)  | 68355937<br>(±5.1%)  | 9077760<br>(±10.9%)  | 79.0<br>(±0.6%) | 43538<br>(±2.5%)  |
|                        | Mock       | 24     | 92254389<br>(±8.2%)   | 92229654<br>(±8.2%)   | 73059843<br>(±8.1%)  | 65787819<br>(±8.2%)  | 7272024<br>(±7.3%)   | 79.3<br>(±0.2%) | 44632<br>(±0.8%)  |
|                        | Mock       | 48     | 97238219<br>(±4.6%)   | 97212573<br>(±4.6%)   | 77152959<br>(±4.6%)  | 70954344<br>(±4.4%)  | 6198615<br>(±12.2%)  | 79.4<br>(±0.1%) | 44663<br>(±0.4%)  |
|                        | <i>Xap</i> | 0      | 81708983<br>(±3.4%)   | 81686076<br>(±3.4%)   | 64649642<br>(±3.6%)  | 55136256<br>(±3.5%)  | 9513386<br>(±4.7%)   | 79.1<br>(±0.2%) | 43583<br>(±0.2%)  |
|                        | <i>Xap</i> | 8      | 99910895<br>(±5.0%)   | 99883764<br>(±5.0%)   | 78824174<br>(±5.4%)  | 70007671<br>(±4.7%)  | 8816503<br>(±11.1%)  | 78.9<br>(±0.5%) | 42190<br>(±6.1%)  |
|                        | <i>Xap</i> | 24     | 89059555<br>(±2.5%)   | 89035464<br>(±2.5%)   | 69870807<br>(±2.8%)  | 63016977<br>(±3.7%)  | 6853830<br>(±7.5%)   | 78.5<br>(±0.6%) | 44580<br>(±0.5%)  |
|                        | <i>Xap</i> | 48     | 85520810<br>(±4.8%)   | 85499423<br>(±4.8%)   | 66745366<br>(±3.5%)  | 60319696<br>(±4.2%)  | 6425670<br>(±13.8%)  | 78.7<br>(±0.6%) | 44452<br>(±0.3%)  |
|                        | Mock       | 0      | 89306333<br>(±6.0%)   | 89285555<br>(±6.0%)   | 70294844<br>(±5.8%)  | 60446036<br>(±5.5%)  | 9848808<br>(±12.8%)  | 78.8<br>(±0.5%) | 44022<br>(±0.1%)  |
|                        | Mock       | 8      | 104029850<br>(±10.9%) | 104004500<br>(±10.9%) | 82477919<br>(±11.3%) | 71323134<br>(±11.2%) | 11154785<br>(±16.2%) | 79.2<br>(±0.5%) | 44590<br>(±0.4%)  |
|                        | Mock       | 24     | 97594783<br>(±6.4%)   | 97572905<br>(±6.4%)   | 76965956<br>(±6.3%)  | 69518533<br>(±7.4%)  | 7447423<br>(±4.8%)   | 78.9<br>(±0.2%) | 44897<br>(±0.5%)  |
|                        | Mock       | 48     | 87986621<br>(±7.6%)   | 87966646<br>(±7.6%)   | 68734223<br>(±7.2%)  | 62959382<br>(±8.3%)  | 5774841<br>(±4.7%)   | 78.2<br>(±0.6%) | 44044<br>(±2.0%)  |
| <b>CBB-resistant</b>   | <i>Xap</i> | 0      | 77550060<br>(±8.7%)   | 77532011<br>(±8.7%)   | 61824489<br>(±8.0%)  | 52424394<br>(±7.3%)  | 9400096<br>(±13.0%)  | 79.8<br>(±0.6%) | 35826<br>(±22.0%) |
|                        | <i>Xap</i> | 8      | 94459242<br>(±5.6%)   | 94236153<br>(±5.7%)   | 74577706<br>(±5.9%)  | 64493749<br>(±6.8%)  | 10083957<br>(±7.0%)  | 79.1<br>(±0.3%) | 43219<br>(±2.3%)  |
|                        | <i>Xap</i> | 24     | 84607080<br>(±3.7%)   | 84586474<br>(±3.7%)   | 60158244<br>(±10.3%) | 54746523<br>(±9.9%)  | 5411721<br>(±14.8%)  | 79.3<br>(±1.1%) | 37638<br>(±19.0%) |
|                        | <i>Xap</i> | 48     | 90716979<br>(±1.6%)   | 90692987<br>(±1.6%)   | 70755116<br>(±2.1%)  | 65649321<br>(±1.6%)  | 5105795<br>(±12.8%)  | 78.0<br>(±0.9%) | 45085<br>(±0.02%) |

<sup>1</sup>Data represents the mean ± percent standard error (in parentheses) of three experimental replicates.

Tables S2 to S51 list upregulated and/or downregulated *P. vulgaris* genes in leaves of a CBB-resistant RIL and/or a CBB-susceptible RIL following inoculation with *Xanthomonas axonopodis* (*Xap*). Significant DEGs had a q value  $\leq 0.05$ ; this statistical information is provided in Excel S1 and Excel S2 spreadsheets of the Supplementary Information. **In Tables S2 to S51, the significant upregulated DEGs (as statistically determined in Excel S1 & S2) are shaded dark grey for the *Xap* treatment relative to the light grey mock treatment at the specified PI sampling time; the significant downregulated DEGs (as statistically determined in Excel S1 & S2) are shaded dark grey for the mock treatment relative to light grey for the *Xap* treatment at the specified PI period. Non-shaded data are not significantly different at the specified PI sampling period.**

**Table S2. Transcript abundance for genes upregulated in the CBB-resistant RIL at 0 h post-inoculation (PI) with *Xanthomonas axonopodis* (*Xap*).** Transcript levels for individual genes corresponding to each RIL/ inoculation treatment/ sampling time PI are represented as FPKM  $\pm$  SE of three experimental replicates.

| Gene ID                 | Gene Annotation                                                           | Transcript levels (FPKM) |                     |                       |                       |                        |                     |                      |                       |
|-------------------------|---------------------------------------------------------------------------|--------------------------|---------------------|-----------------------|-----------------------|------------------------|---------------------|----------------------|-----------------------|
|                         |                                                                           | Mock inoculation         |                     |                       |                       | <i>Xap</i> inoculation |                     |                      |                       |
|                         |                                                                           | 0 h PI                   | 8 h PI              | 24 h PI               | 48 h PI               | 0 h PI                 | 8 h PI              | 24 h PI              | 48 h PI               |
| <i>Phvul.002G024200</i> | Domain of unknown function                                                | 0.78<br>$\pm 0.21$       | 0.75<br>$\pm 0.36$  | 1.58<br>$\pm 0.24$    | 2.61<br>$\pm 0.85$    | 3.44<br>$\pm 0.47$     | 0.37<br>$\pm 0.23$  | 1.88<br>$\pm 0.07$   | 1.06<br>$\pm 0.31$    |
| <i>Phvul.002G231600</i> | 17.6 kDa class I heat shock protein 1-related                             | 2.71<br>$\pm 0.83$       | 2.89<br>$\pm 0.29$  | 15.88<br>$\pm 0.93$   | 24.34<br>$\pm 2.67$   | 28.86<br>$\pm 14.77$   | 10.36<br>$\pm 6.6$  | 20.35<br>$\pm 1.8$   | 27.81<br>$\pm 5.07$   |
| <i>Phvul.002G240100</i> | Receptor like protein 55                                                  | 0.62<br>$\pm 0.37$       | 0.4<br>$\pm 0.24$   | 0.81<br>$\pm 0.17$    | 0.62<br>$\pm 0.1$     | 2.75<br>$\pm 0.54$     | 0.56<br>$\pm 0.38$  | 0.75<br>$\pm 0.17$   | 0.31<br>$\pm 0.12$    |
| <i>Phvul.003G203400</i> | No functional annotation                                                  | 2.15<br>$\pm 0.38$       | 1.8<br>$\pm 0.69$   | 5.56<br>$\pm 0.76$    | 4.57<br>$\pm 1.4$     | 9.25<br>$\pm 3.77$     | 3.82<br>$\pm 2.37$  | 5.37<br>$\pm 0.96$   | 5.23<br>$\pm 0.19$    |
| <i>Phvul.004G107700</i> | Heat shock protein 90                                                     | 51.05<br>$\pm 18.33$     | 29.26<br>$\pm 7.86$ | 121.17<br>$\pm 10.06$ | 112.91<br>$\pm 13.09$ | 222.51<br>$\pm 80.19$  | 81.13<br>$\pm 60.3$ | 130.61<br>$\pm 8.42$ | 126.16<br>$\pm 20.74$ |
| <i>Phvul.007G060900</i> | Protein IQ-domain 19                                                      | 0.26<br>$\pm 0.12$       | 0.38<br>$\pm 0.08$  | 0.34<br>$\pm 0.09$    | 0.74<br>$\pm 0.02$    | 1.07<br>$\pm 0.18$     | 0.29<br>$\pm 0.2$   | 0.48<br>$\pm 0.18$   | 0.46<br>$\pm 0.15$    |
| <i>Phvul.008G000200</i> | Protein tyrosine kinase / Di-glucose binding within endoplasmic reticulum | 0.39<br>$\pm 0.06$       | 0.41<br>$\pm 0.28$  | 0.44<br>$\pm 0.08$    | 0.48<br>$\pm 0.09$    | 1.64<br>$\pm 0.59$     | 0.51<br>$\pm 0.27$  | 0.37<br>$\pm 0.09$   | 0.6<br>$\pm 0.31$     |
| <i>Phvul.009G072700</i> | No functional annotation                                                  | 0.98<br>$\pm 0.42$       | 0.48<br>$\pm 0.16$  | 1.65<br>$\pm 0.53$    | 0.53<br>$\pm 0.12$    | 3.95<br>$\pm 1.59$     | 1.16<br>$\pm 0.65$  | 1<br>$\pm 0.02$      | 0.14<br>$\pm 0.05$    |
| <i>Phvul.011G183500</i> | Pathogenesis-related protein Bet v I family                               | 0.51<br>$\pm 0.14$       | 0.97<br>$\pm 0.45$  | 0.21<br>$\pm 0.15$    | 0.06<br>$\pm 0.06$    | 2.82<br>$\pm 1.51$     | 0.56<br>$\pm 0.23$  | 0.19<br>$\pm 0.18$   | 0<br>$\pm 0$          |

**Table S3. Transcript abundance for genes upregulated in the CBB-resistant RIL at 8 h post-inoculation (PI) with *Xanthomonas axonopodis* (Xap).** Transcript levels for individual genes corresponding to each RIL/ inoculation treatment/ sampling time PI are represented as FPKM  $\pm$  SE of three experimental replicates.

| Gene ID                 | Gene Annotation              | Transcript levels (FPKM) |                    |                    |                    |                    |                    |                   |                    |
|-------------------------|------------------------------|--------------------------|--------------------|--------------------|--------------------|--------------------|--------------------|-------------------|--------------------|
|                         |                              | Mock inoculation         |                    |                    |                    | Xap inoculation    |                    |                   |                    |
|                         |                              | 0 h PI                   | 8 h PI             | 24 h PI            | 48 h PI            | 0 h PI             | 8 h PI             | 24 h PI           | 48 h PI            |
| <i>Phvul.006G075600</i> | Peroxidase / Lactoperoxidase | 0.22<br>$\pm 0.11$       | 0.34<br>$\pm 0.23$ | 0.16<br>$\pm 0.07$ | 0.24<br>$\pm 0.12$ | 0.28<br>$\pm 0.12$ | 1.76<br>$\pm 0.81$ | 0.5<br>$\pm 0.32$ | 0.93<br>$\pm 0.26$ |

**Table S4. Transcript abundance for genes upregulated in the CBB-resistant RIL at 24 h post-inoculation (PI) with *Xanthomonas axonopodis* (Xap).** Transcript levels for individual genes corresponding to each RIL/ inoculation treatment/ sampling time PI are represented as FPKM  $\pm$  SE of three experimental replicates.

| Gene ID                 | Gene Annotation                                 | Transcript levels (FPKM) |                    |                    |                      |                     |                    |                      |                      |
|-------------------------|-------------------------------------------------|--------------------------|--------------------|--------------------|----------------------|---------------------|--------------------|----------------------|----------------------|
|                         |                                                 | Mock inoculation         |                    |                    |                      | Xap inoculation     |                    |                      |                      |
|                         |                                                 | 0 h PI                   | 8 h PI             | 24 h PI            | 48 h PI              | 0 h PI              | 8 h PI             | 24 h PI              | 48 h PI              |
| <i>Phvul.001G002200</i> | No functional annotation                        | 3.06<br>$\pm 1.25$       | 1.34<br>$\pm 0.5$  | 1.53<br>$\pm 0.35$ | 7.96<br>$\pm 7.03$   | 3.43<br>$\pm 0.67$  | 1.48<br>$\pm 0.72$ | 12.16<br>$\pm 5.77$  | 21.46<br>$\pm 12.11$ |
| <i>Phvul.001G170800</i> | Zinc finger protein, ZAT11                      | 1.39<br>$\pm 0.58$       | 0.49<br>$\pm 0.3$  | 0.47<br>$\pm 0.15$ | 4.1<br>$\pm 3.99$    | 1.17<br>$\pm 0.29$  | 0.53<br>$\pm 0.1$  | 2.54<br>$\pm 1.4$    | 7.92<br>$\pm 5.38$   |
| <i>Phvul.001G203300</i> | Glutaredoxin-C11-related                        | 0.19<br>$\pm 0.18$       | 0<br>$\pm 0$       | 0<br>$\pm 0$       | 0.44<br>$\pm 0.44$   | 0.45<br>$\pm 0.45$  | 0.41<br>$\pm 0.23$ | 1.11<br>$\pm 0.64$   | 0.15<br>$\pm 0.16$   |
| <i>Phvul.001G243600</i> | Serine/threonine-protein kinase-like protein    | 0.57<br>$\pm 0.22$       | 0.15<br>$\pm 0.04$ | 0.21<br>$\pm 0.03$ | 0.88<br>$\pm 0.79$   | 0.51<br>$\pm 0.17$  | 0.61<br>$\pm 0.14$ | 0.99<br>$\pm 0.44$   | 3.44<br>$\pm 1.88$   |
| <i>Phvul.002G275000</i> | NAC domain-containing protein 2                 | 3.1<br>$\pm 0.5$         | 3.35<br>$\pm 0.58$ | 2.37<br>$\pm 0.45$ | 9.52<br>$\pm 7.16$   | 3.01<br>$\pm 0.57$  | 4.14<br>$\pm 0.6$  | 10.58<br>$\pm 4.02$  | 30.27<br>$\pm 9.17$  |
| <i>Phvul.002G297100</i> | WRKY DNA -binding domain                        | 3.53<br>$\pm 0.96$       | 1.55<br>$\pm 0.5$  | 0.89<br>$\pm 0.07$ | 8.22<br>$\pm 6.7$    | 2.09<br>$\pm 0.47$  | 1.89<br>$\pm 0.12$ | 17.8<br>$\pm 8.44$   | 20.63<br>$\pm 14.86$ |
| <i>Phvul.003G292400</i> | AP2 domain                                      | 0.09<br>$\pm 0.09$       | 0<br>$\pm 0$       | 0<br>$\pm 0$       | 0.14<br>$\pm 0.14$   | 0.09<br>$\pm 0.05$  | 0<br>$\pm 0$       | 0.67<br>$\pm 0.41$   | 0.72<br>$\pm 0.43$   |
| <i>Phvul.003G030601</i> | VQ motif                                        | 0.29<br>$\pm 0.04$       | 0.26<br>$\pm 0.13$ | 0.45<br>$\pm 0.21$ | 2.07<br>$\pm 1.39$   | 0.25<br>$\pm 0.12$  | 0.38<br>$\pm 0.1$  | 2.22<br>$\pm 0.93$   | 4.22<br>$\pm 1.42$   |
| <i>Phvul.003G034400</i> | Protein of unknown function                     | 4.07<br>$\pm 0.55$       | 3.27<br>$\pm 0.8$  | 2.15<br>$\pm 0.17$ | 8.42<br>$\pm 5.9$    | 4.61<br>$\pm 1.07$  | 4.24<br>$\pm 0.44$ | 17.2<br>$\pm 7.6$    | 29.46<br>$\pm 15.72$ |
| <i>Phvul.003G048800</i> | No functional annotation                        | 3.6<br>$\pm 1.27$        | 2.57<br>$\pm 0.55$ | 2.42<br>$\pm 0.26$ | 10.53<br>$\pm 6.3$   | 5.73<br>$\pm 1$     | 4.13<br>$\pm 2.02$ | 11.55<br>$\pm 4.4$   | 22.15<br>$\pm 12$    |
| <i>Phvul.003G251200</i> | Glycosyltransferase 8 domain-containing protein | 0.41<br>$\pm 0.21$       | 0.28<br>$\pm 0.13$ | 0.29<br>$\pm 0.02$ | 0.2<br>$\pm 0.05$    | 0.56<br>$\pm 0.14$  | 0.42<br>$\pm 0.38$ | 1.41<br>$\pm 0.83$   | 1.11<br>$\pm 0.88$   |
| <i>Phvul.004G162500</i> | Arabinogalactan peptide 16-related              | 6.83<br>$\pm 1.52$       | 5.92<br>$\pm 1.15$ | 2.7<br>$\pm 0.51$  | 16.81<br>$\pm 13.18$ | 10.82<br>$\pm 2.16$ | 11.1<br>$\pm 2.01$ | 21.87<br>$\pm 10.18$ | 65.9<br>$\pm 35.02$  |
| <i>Phvul.005G057400</i> | Expressed protein                               | 1.24<br>$\pm 0.8$        | 1.45<br>$\pm 0.55$ | 0.56<br>$\pm 0.29$ | 2.17<br>$\pm 2.03$   | 1.61<br>$\pm 0.54$  | 1.83<br>$\pm 0.59$ | 8.08<br>$\pm 4.05$   | 15.97<br>$\pm 12.08$ |

Table S4 continued

| Gene ID                 | Gene Annotation                                           | Transcript levels (FPKM) |               |               |                |                 |                |                |                 |
|-------------------------|-----------------------------------------------------------|--------------------------|---------------|---------------|----------------|-----------------|----------------|----------------|-----------------|
|                         |                                                           | Mock inoculation         |               |               |                | Xap inoculation |                |                |                 |
|                         |                                                           | 0 h PI                   | 8 h PI        | 24 h PI       | 48 h PI        | 0 h PI          | 8 h PI         | 24 h PI        | 48 h PI         |
| <i>Phvul.005G079650</i> | No functional annotation                                  | 0.91<br>±0.57            | 0.17<br>±0.17 | 0<br>±0       | 0.31<br>±0.31  | 0<br>±0         | 0.3<br>±0.3    | 1.43<br>±0.88  | 3.62<br>±3.11   |
| <i>Phvul.005G100600</i> | No functional annotation                                  | 6.32<br>±0.38            | 5.91<br>±0.6  | 2.5<br>±0.16  | 6.74<br>±3.48  | 10.15<br>±2     | 7.66<br>±1.71  | 13.02<br>±4.95 | 25.24<br>±12.62 |
| <i>Phvul.005G122501</i> | NAC domain-containing protein 61-related                  | 0.54<br>±0.23            | 0.23<br>±0.2  | 0.14<br>±0.06 | 0.39<br>±0.32  | 0.52<br>±0.15   | 0.22<br>±0.2   | 1.96<br>±0.85  | 2.02<br>±1.77   |
| <i>Phvul.006G165800</i> | Protein TIFY 5A-related                                   | 0.09<br>±0.01            | 0.27<br>±0.14 | 0<br>±0       | 0.1<br>±0.06   | 0.1<br>±0.06    | 0.16<br>±0.08  | 0.71<br>±0.53  | 0.97<br>±0.37   |
| <i>Phvul.006G183100</i> | AP2 domain                                                | 1.76<br>±0.56            | 1.49<br>±0.23 | 1.17<br>±0.13 | 6.42<br>±4.31  | 1.84<br>±0.64   | 2.03<br>±1.03  | 7.49<br>±3.21  | 22.23<br>±8.83  |
| <i>Phvul.006G111700</i> | WRKY DNA-binding domain                                   | 5.77<br>±1.3             | 3.91<br>±1.18 | 3.4<br>±0.3   | 9.6<br>±6.1    | 5.47<br>±1.06   | 4.57<br>±1.31  | 15.74<br>±5.96 | 27.1<br>±15.65  |
| <i>Phvul.007G035500</i> | Domain of unknown function                                | 1.19<br>±0.3             | 1.01<br>±0.38 | 0.3<br>±0.07  | 2.71<br>±2.25  | 1.37<br>±0.54   | 2<br>±0.55     | 2.13<br>±1.07  | 7.06<br>±3.85   |
| <i>Phvul.007G273400</i> | MYB-like DNA-binding protein                              | 2.83<br>±0.26            | 2.69<br>±0.04 | 1.44<br>±0.13 | 6.65<br>±4.36  | 2.29<br>±0.87   | 3.28<br>±0.47  | 8.62<br>±3.74  | 19.2<br>±5.59   |
| <i>Phvul.007G066500</i> | Dehydration-responsive element-binding protein 1A-related | 0.21<br>±0.13            | 0<br>±0       | 0<br>±0       | 0.07<br>±0.08  | 0.16<br>±0.16   | 0<br>±0        | 1.15<br>±1     | 0.89<br>±0.72   |
| <i>Phvul.008G169800</i> | No functional annotation                                  | 3.53<br>±1.42            | 2.48<br>±0.9  | 2.49<br>±0.39 | 10.1<br>±7.84  | 4.55<br>±1.84   | 4.05<br>±1.78  | 12.75<br>±5.35 | 38.82<br>±19.14 |
| <i>Phvul.008G225500</i> | Hs1pro-1 protein C-terminus                               | 3.31<br>±0.66            | 2.36<br>±0.43 | 1.23<br>±0.3  | 9.65<br>±6.92  | 1.5<br>±0.28    | 2.54<br>±0.42  | 10.38<br>±4.99 | 28.69<br>±14.66 |
| <i>Phvul.008G235100</i> | Calcium-binding protein CML24-related                     | 11.71<br>±4.09           | 5.83<br>±0.94 | 4.64<br>±0.38 | 10.07<br>±5.42 | 20.69<br>±5.54  | 12.34<br>±3.43 | 22.38<br>±9.39 | 27.71<br>±20.37 |
| <i>Phvul.008G238500</i> | U-Box domain-containing protein 54-related                | 0.47<br>±0.1             | 0.23<br>±0.13 | 0.23<br>±0.07 | 2.61<br>±2.46  | 0.25<br>±0.03   | 0.2<br>±0.06   | 2.33<br>±1.03  | 6.17<br>±3.34   |
| <i>Phvul.008G259800</i> | Protein phosphatase 2C-like protein-related               | 5.72<br>±1.65            | 3.74<br>±0.19 | 4.7<br>±0.42  | 13.69<br>±8.36 | 4.4<br>±0.72    | 4.21<br>±1.07  | 19.06<br>±8.08 | 33.16<br>±20.24 |

Table S4 continued

| Gene ID                 | Gene Annotation                                                              | Transcript levels (FPKM) |                |                |                 |                 |                 |                 |                  |
|-------------------------|------------------------------------------------------------------------------|--------------------------|----------------|----------------|-----------------|-----------------|-----------------|-----------------|------------------|
|                         |                                                                              | Mock inoculation         |                |                |                 | Xap inoculation |                 |                 |                  |
|                         |                                                                              | 0 h PI                   | 8 h PI         | 24 h PI        | 48 h PI         | 0 h PI          | 8 h PI          | 24 h PI         | 48 h PI          |
| <i>Phvul.009G250400</i> | E3 ubiquitin-protein ligase RNF38/44                                         | 10.87<br>±2.96           | 5.59<br>±1.15  | 3.35<br>±0.57  | 10.02<br>±5.94  | 16.63<br>±4.79  | 14.3<br>±8.04   | 21.43<br>±9.45  | 37.04<br>±21.33  |
| <i>Phvul.009G045601</i> | No functional annotation                                                     | 6.03<br>±2.59            | 2.93<br>±1.26  | 0.99<br>±0.12  | 21.51<br>±19.06 | 3.99<br>±0.64   | 3.8<br>±1.25    | 15.24<br>±8.21  | 54.97<br>±33.5   |
| <i>Phvul.009G045700</i> | No functional annotation                                                     | 3.06<br>±1.27            | 1.33<br>±0.58  | 1.72<br>±0.1   | 12.02<br>±10.56 | 2.26<br>±0.31   | 1.95<br>±0.59   | 15.44<br>±7.61  | 42.79<br>±26.05  |
| <i>Phvul.009G070800</i> | C2H2-type zinc finger                                                        | 22.26<br>±9.12           | 8.81<br>±3.67  | 11.06<br>±1.33 | 59.09<br>±42.64 | 21.58<br>±4.56  | 15.63<br>±8.53  | 51.39<br>±20.43 | 142.33<br>±63.62 |
| <i>Phvul.009G143800</i> | Solute carrier family 25 (mitochondrial oxoglutarate transporter), member 11 | 0.44<br>±0.01            | 0.69<br>±0.33  | 0.16<br>±0.06  | 3.21<br>±3.03   | 0.5<br>±0.07    | 0.77<br>±0.13   | 4.83<br>±2.61   | 8.22<br>±5.75    |
| <i>Phvul.009G253300</i> | COBRA-like protein 7-related                                                 | 0.25<br>±0.06            | 0.16<br>±0.07  | 0.16<br>±0.02  | 0.49<br>±0.03   | 0.23<br>±0.07   | 0.2<br>±0.01    | 0.67<br>±0.29   | 0.83<br>±0.39    |
| <i>Phvul.010G062500</i> | WRKY transcription factor 33                                                 | 0.63<br>±0.17            | 0.39<br>±0.09  | 0.27<br>±0.09  | 2.2<br>±1.81    | 0.17<br>±0.05   | 0.44<br>±0.1    | 4.24<br>±1.96   | 5<br>±3.24       |
| <i>Phvul.010G120700</i> | F11O4.3-related                                                              | 0.42<br>±0.06            | 0.45<br>±0.13  | 0.16<br>±0.03  | 0.38<br>±0.13   | 0.87<br>±0.1    | 0.54<br>±0.25   | 0.71<br>±0.08   | 1.09<br>±0.38    |
| <i>Phvul.011G003100</i> | Serine/threonine-protein kinase-like protein CCR4                            | 2.76<br>±0.88            | 1.47<br>±0.37  | 0.9<br>±0.22   | 4.46<br>±3.59   | 4.93<br>±0.89   | 2.8<br>±1.41    | 13.81<br>±6.67  | 12.45<br>±9.68   |
| <i>Phvul.011G095500</i> | NAC domain-containing protein 61-related                                     | 0.92<br>±0.25            | 0.66<br>±0.06  | 1.09<br>±0.14  | 4.19<br>±2.01   | 0.95<br>±0.21   | 0.72<br>±0.22   | 9.54<br>±3.71   | 13.87<br>±9.57   |
| <i>Phvul.011G097400</i> | CCR4-associated factor 1 homolog 11-related                                  | 34.55<br>±5.48           | 25.29<br>±2.22 | 21.44<br>±2.59 | 63.7<br>±39.05  | 49.54<br>±13.17 | 42.66<br>±18.23 | 90.1<br>±32.27  | 138.53<br>±61.98 |
| <i>Phvul.011G036600</i> | SAUR family protein                                                          | 1.43<br>±0.55            | 0.73<br>±0.35  | 1.06<br>±0.36  | 2.19<br>±0.41   | 1.8<br>±0.06    | 0.98<br>±0.28   | 5.21<br>±1.78   | 1.55<br>±0.44    |
| <i>Phvul.011G048800</i> | Domain of unknown function                                                   | 11.61<br>±3.38           | 5.27<br>±1.59  | 3.84<br>±0.83  | 19.13<br>±14.99 | 6.23<br>±1.36   | 7.9<br>±1.93    | 15.52<br>±5.75  | 37.94<br>±21.02  |

Table S4 continued

|                                                                                                                |                                            | Transcript levels (FPKM) |                |               |                 |                        |               |                 |                 |
|----------------------------------------------------------------------------------------------------------------|--------------------------------------------|--------------------------|----------------|---------------|-----------------|------------------------|---------------|-----------------|-----------------|
|                                                                                                                |                                            | Mock inoculation         |                |               |                 | <i>Xap</i> inoculation |               |                 |                 |
| Gene ID                                                                                                        | Gene Annotation                            | 0 h PI                   | 8 h PI         | 24 h PI       | 48 h PI         | 0 h PI                 | 8 h PI        | 24 h PI         | 48 h PI         |
| <i>Phvul.007G074600</i> ,<br><i>Phvul.007G074800</i> ,<br><i>Phvul.007G074900</i> ,<br><i>Phvul.007G075000</i> | Copper transport family<br>protein-related | 19.06<br>±2.85           | 13.92<br>±3.49 | 7.49<br>±0.83 | 21.02<br>±12.89 | 20.46<br>±3.67         | 15.55<br>±2.8 | 36.77<br>±13.54 | 58.03<br>±33.06 |
| XLOC_025168                                                                                                    | No functional annotation                   | 0<br>±0                  | 0.26<br>±0.26  | 0<br>±0       | 0.57<br>±0.57   | 0<br>±0                | 0.2<br>±0.2   | 1.41<br>±0.29   | 5.45<br>±1.62   |

**Table S5. Transcript abundance for genes upregulated in the CBB-resistant RIL at 48 h post-inoculation (PI) with *Xanthomonas axonopodis* (Xap).** Transcript levels for individual genes corresponding to each RIL/ inoculation treatment/ sampling time PI are represented as FPKM  $\pm$  SE of three experimental replicates.

| Gene ID                 | Gene Annotation                                              | Transcript levels (FPKM) |                    |                    |                    |                    |                    |                    |                     |
|-------------------------|--------------------------------------------------------------|--------------------------|--------------------|--------------------|--------------------|--------------------|--------------------|--------------------|---------------------|
|                         |                                                              | Mock inoculation         |                    |                    |                    | Xap inoculation    |                    |                    |                     |
|                         |                                                              | 0 h PI                   | 8 h PI             | 24 h PI            | 48 h PI            | 0 h PI             | 8 h PI             | 24 h PI            | 48 h PI             |
| <i>Phvul.001G019200</i> | MYB-like DNA-binding protein                                 | 0.2<br>$\pm 0.1$         | 0.4<br>$\pm 0.09$  | 0.04<br>$\pm 0.04$ | 0.45<br>$\pm 0.21$ | 0.05<br>$\pm 0.05$ | 0.15<br>$\pm 0.09$ | 0.57<br>$\pm 0.02$ | 2.51<br>$\pm 0.64$  |
| <i>Phvul.001G019300</i> | AR781                                                        | 0.28<br>$\pm 0.1$        | 0.14<br>$\pm 0.08$ | 0.44<br>$\pm 0.09$ | 1.04<br>$\pm 0.65$ | 0.19<br>$\pm 0.13$ | 0.27<br>$\pm 0.02$ | 0.79<br>$\pm 0.21$ | 5.14<br>$\pm 1.14$  |
| <i>Phvul.001G039900</i> | WRKY DNA-binding domain                                      | 2.49<br>$\pm 0.5$        | 3.36<br>$\pm 0.68$ | 2.11<br>$\pm 0.35$ | 2.83<br>$\pm 0.95$ | 2.56<br>$\pm 0.7$  | 3.39<br>$\pm 0.17$ | 4.01<br>$\pm 1.16$ | 16.61<br>$\pm 5.46$ |
| <i>Phvul.001G040000</i> | L-type lectin-domain containing receptor kinase ix.1-related | 0.17<br>$\pm 0.13$       | 0.16<br>$\pm 0.05$ | 0.02<br>$\pm 0.01$ | 0.07<br>$\pm 0.05$ | 0<br>$\pm 0$       | 0.15<br>$\pm 0.05$ | 0.09<br>$\pm 0.02$ | 0.52<br>$\pm 0.05$  |
| <i>Phvul.001G040700</i> | L-type lectin-domain containing receptor kinase ix.1-related | 1.61<br>$\pm 0.32$       | 1.99<br>$\pm 0.85$ | 2.47<br>$\pm 0.54$ | 2.99<br>$\pm 0.72$ | 1.95<br>$\pm 0.18$ | 1.51<br>$\pm 0.33$ | 2.96<br>$\pm 0.31$ | 23.94<br>$\pm 3.27$ |
| <i>Phvul.001G042100</i> | WRKY DNA-binding domain                                      | 0.82<br>$\pm 0.33$       | 0.65<br>$\pm 0.27$ | 0.37<br>$\pm 0.18$ | 0.63<br>$\pm 0.31$ | 0.19<br>$\pm 0.11$ | 0.74<br>$\pm 0.23$ | 1.34<br>$\pm 0.69$ | 10.69<br>$\pm 4.35$ |
| <i>Phvul.001G042200</i> | WRKY transcription factor 40-related                         | 1.58<br>$\pm 0.24$       | 1.84<br>$\pm 0.74$ | 1.04<br>$\pm 0.22$ | 1.82<br>$\pm 0.79$ | 0.75<br>$\pm 0.32$ | 1.45<br>$\pm 0.18$ | 2.98<br>$\pm 1.22$ | 30.93<br>$\pm 17.3$ |
| <i>Phvul.001G051000</i> | No functional annotation                                     | 0.08<br>$\pm 0.05$       | 0.19<br>$\pm 0.1$  | 0.12<br>$\pm 0.02$ | 0.1<br>$\pm 0.03$  | 0.01<br>$\pm 0.01$ | 0.06<br>$\pm 0.02$ | 0.19<br>$\pm 0.13$ | 1.28<br>$\pm 0.76$  |
| <i>Phvul.001G073600</i> | E3 ubiquitin-protein ligase ATL42-related                    | 0.03<br>$\pm 0.01$       | 0.05<br>$\pm 0.04$ | 0.1<br>$\pm 0.03$  | 0.18<br>$\pm 0.05$ | 0<br>$\pm 0$       | 0.14<br>$\pm 0.04$ | 0.09<br>$\pm 0.09$ | 0.98<br>$\pm 0.23$  |
| <i>Phvul.001G074200</i> | Regulator of chromosome condensation                         | 0<br>$\pm 0$             | 0.01<br>$\pm 0.01$ | 0.08<br>$\pm 0.04$ | 0.08<br>$\pm 0.02$ | 0.05<br>$\pm 0.03$ | 0.03<br>$\pm 0.02$ | 0.05<br>$\pm 0.02$ | 0.56<br>$\pm 0.24$  |
| <i>Phvul.001G088200</i> | WRKY transcription factor 45-related                         | 1.46<br>$\pm 0.14$       | 1.61<br>$\pm 0.52$ | 3.47<br>$\pm 1.35$ | 5.99<br>$\pm 1.05$ | 1.02<br>$\pm 0.13$ | 0.78<br>$\pm 0.05$ | 4.15<br>$\pm 1.87$ | 39.03<br>$\pm 5.24$ |
| <i>Phvul.001G095600</i> | EF-hand calcium-binding domain containing protein            | 0.06<br>$\pm 0.06$       | 0.09<br>$\pm 0.09$ | 0.46<br>$\pm 0.37$ | 0.58<br>$\pm 0.18$ | 0.09<br>$\pm 0.09$ | 0.43<br>$\pm 0.16$ | 1.06<br>$\pm 0.11$ | 9.72<br>$\pm 2.1$   |



Table S5 continued

| Gene ID                                              | Gene Annotation                                                               | Transcript levels (FPKM) |               |               |               |                        |               |               |                 |
|------------------------------------------------------|-------------------------------------------------------------------------------|--------------------------|---------------|---------------|---------------|------------------------|---------------|---------------|-----------------|
|                                                      |                                                                               | Mock inoculation         |               |               |               | <i>Xap</i> inoculation |               |               |                 |
|                                                      |                                                                               | 0 h PI                   | 8 h PI        | 24 h PI       | 48 h PI       | 0 h PI                 | 8 h PI        | 24 h PI       | 48 h PI         |
| <i>Phvul.001G102300</i>                              | Tetrahydrofolate dehydrogenase                                                | 4.13<br>±1.1             | 3.62<br>±1.66 | 2.46<br>±0.15 | 1.61<br>±0.21 | 5.17<br>±0.79          | 2.95<br>±0.84 | 2.75<br>±0.69 | 7.63<br>±0.69   |
| <i>Phvul.001G108101</i>                              | MATE efflux family protein                                                    | 1.91<br>±0.36            | 1.86<br>±0.83 | 2.97<br>±0.68 | 2.76<br>±0.54 | 2.44<br>±0.18          | 1.43<br>±0.29 | 2.65<br>±0.16 | 11.25<br>±3.38  |
| <i>Phvul.001G112400</i>                              | Shikimate <i>O</i> -hydroxycinnamoyltransferase                               | 0.14<br>±0.07            | 0.05<br>±0.04 | 0.31<br>±0.13 | 0.18<br>±0.09 | 0<br>±0                | 0.15<br>±0.08 | 0.22<br>±0.07 | 5.38<br>±0.78   |
| <i>Phvul.001G124700</i> ,<br><i>Phvul.001G124800</i> | Trans-aconitate 3-methyltransferase                                           | 4.17<br>±1.29            | 4.04<br>±2.26 | 2.6<br>±0.57  | 2.13<br>±0.35 | 4.59<br>±0.59          | 3.55<br>±0.99 | 4.57<br>±1.4  | 30.48<br>±15.91 |
| <i>Phvul.001G130200</i>                              | Glycosyltransferase                                                           | 0.3<br>±0.16             | 0.55<br>±0.14 | 0.39<br>±0.18 | 0.57<br>±0.29 | 0.28<br>±0.09          | 0.45<br>±0.1  | 1.05<br>±0.41 | 6.58<br>±2.93   |
| <i>Phvul.001G131000</i>                              | Heat shock transcription factor, other eukaryote                              | 0.14<br>±0.06            | 0.1<br>±0.05  | 0.19<br>±0.08 | 0.18<br>±0.05 | 0.05<br>±0.03          | 0.09<br>±0.03 | 0.33<br>±0.16 | 3<br>±0.42      |
| <i>Phvul.001G135200</i>                              | Raffinose synthase                                                            | 2.09<br>±0.24            | 2.16<br>±0.12 | 2.33<br>±0.2  | 3.2<br>±0.92  | 1.38<br>±0.32          | 1.64<br>±0.24 | 2.68<br>±0.18 | 18.72<br>±11.32 |
| <i>Phvul.001G142000</i>                              | Late embryogenesis abundant protein 4-5                                       | 1.57<br>±1.47            | 2.42<br>±1.4  | 0.17<br>±0.06 | 0<br>±0       | 0.03<br>±0.03          | 2.88<br>±1.77 | 0.42<br>±0.29 | 3.53<br>±1.6    |
| <i>Phvul.001G155150</i> ,<br><i>Phvul.001G155201</i> | Cation transporting ATPase, C-terminus / Haloacid dehalogenase-like hydrolase | 4.84<br>±0.26            | 5.36<br>±1.64 | 3.88<br>±0.81 | 5.93<br>±1.45 | 3.89<br>±0.44          | 5.09<br>±0.16 | 8.59<br>±2.2  | 32.33<br>±8.23  |
| <i>Phvul.001G155400</i>                              | Calcium binding protein                                                       | 1.43<br>±0.33            | 1.09<br>±0.05 | 1.5<br>±0.09  | 1.63<br>±0.59 | 0.52<br>±0.12          | 1.75<br>±0.39 | 2.19<br>±0.07 | 12.17<br>±2.2   |
| <i>Phvul.001G160100</i>                              | Ethylene-responsive transcription factor, ERF096                              | 0.26<br>±0.18            | 0.37<br>±0.09 | 0.61<br>±0.27 | 1.48<br>±1.3  | 0.37<br>±0.13          | 0.27<br>±0.2  | 1.26<br>±0.54 | 8.24<br>±6.77   |
| <i>Phvul.001G164900</i>                              | Auxin-responsive protein, IAA10-related                                       | 0.64<br>±0.14            | 0.53<br>±0.31 | 0.81<br>±0.24 | 0.68<br>±0.03 | 0.35<br>±0.06          | 0.43<br>±0.14 | 0.97<br>±0.14 | 3.5<br>±1.24    |
| <i>Phvul.001G169300</i>                              | Cation/H <sup>(+)</sup> antiporter 20                                         | 0.07<br>±0.04            | 0.08<br>±0.07 | 0.31<br>±0.13 | 0.17<br>±0.08 | 0.28<br>±0.12          | 0.07<br>±0.05 | 0.14<br>±0.03 | 2.26<br>±0.42   |

Table S5 continued

| Gene ID                 | Gene Annotation                                                                                                             | Transcript levels (FPKM) |               |               |               |                 |               |               |                 |
|-------------------------|-----------------------------------------------------------------------------------------------------------------------------|--------------------------|---------------|---------------|---------------|-----------------|---------------|---------------|-----------------|
|                         |                                                                                                                             | Mock inoculation         |               |               |               | Xap inoculation |               |               |                 |
|                         |                                                                                                                             | 0 h PI                   | 8 h PI        | 24 h PI       | 48 h PI       | 0 h PI          | 8 h PI        | 24 h PI       | 48 h PI         |
| <i>Phvul.001G177700</i> | Phenylalanine ammonia-lyase                                                                                                 | 4.14<br>±0.49            | 4.02<br>±2.34 | 5.06<br>±0.21 | 6.61<br>±1.93 | 3.4<br>±0.35    | 3.53<br>±0.79 | 8.09<br>±1.95 | 37.89<br>±3.72  |
| <i>Phvul.001G192000</i> | No apical meristem (NAM) protein                                                                                            | 0.47<br>±0.18            | 0.58<br>±0.39 | 0.38<br>±0.06 | 0.7<br>±0.27  | 0.82<br>±0.2    | 0.43<br>±0.18 | 0.75<br>±0.16 | 3.42<br>±1.54   |
| <i>Phvul.001G194600</i> | Harpin-induced protein-like-related                                                                                         | 3.23<br>±0.54            | 2.73<br>±0.46 | 2.31<br>±0.48 | 3.88<br>±1.63 | 2.39<br>±0.11   | 3.05<br>±0.29 | 6.67<br>±2.68 | 34.47<br>±10.59 |
| <i>Phvul.001G223700</i> | Inositol 3- $\alpha$ -galactosyltransferase / UDP- $\alpha$ -D-galactose: myo-inositol 3- $\alpha$ -D-galactosyltransferase | 0.57<br>±0.18            | 0.26<br>±0.05 | 0.53<br>±0.25 | 0.58<br>±0.2  | 0.42<br>±0.06   | 0.57<br>±0.07 | 0.52<br>±0.19 | 8.94<br>±2.69   |
| <i>Phvul.001G226000</i> | Calmodulin binding protein-like                                                                                             | 0.52<br>±0.06            | 0.69<br>±0.39 | 0.42<br>±0.1  | 0.73<br>±0.25 | 0.7<br>±0.09    | 0.52<br>±0.22 | 1.53<br>±0.49 | 13.36<br>±3.72  |
| <i>Phvul.001G226100</i> | Calmodulin binding protein-like                                                                                             | 3.01<br>±0.53            | 2.66<br>±0.13 | 4.03<br>±0.14 | 3.87<br>±1.31 | 5.37<br>±1.22   | 3.98<br>±0.56 | 8.59<br>±2.51 | 17.12<br>±9.05  |
| <i>Phvul.001G258900</i> | NADH-ubiquinone reductase complex 1 MLRQ subunit (B12D)                                                                     | 1.17<br>±0.17            | 1.28<br>±0.42 | 2.12<br>±0.49 | 1.19<br>±0.44 | 1.22<br>±0.48   | 1.48<br>±0.81 | 3<br>±1.32    | 12.66<br>±1.82  |
| <i>Phvul.001G264400</i> | K13899 - Cystatin-C (CST3)                                                                                                  | 0.34<br>±0.35            | 0<br>±0       | 1.41<br>±0.59 | 1.07<br>±0.41 | 0.36<br>±0.36   | 0.08<br>±0.08 | 0.46<br>±0.18 | 4.88<br>±2.13   |
| <i>Phvul.002G009700</i> | VQ motif                                                                                                                    | 0.34<br>±0.18            | 0.12<br>±0.12 | 0.31<br>±0.18 | 0<br>±0       | 0<br>±0         | 0.39<br>±0.27 | 0.78<br>±0.16 | 1.43<br>±0.59   |
| <i>Phvul.002G014700</i> | Isoflavone 2'-hydroxylase                                                                                                   | 1.46<br>±0.27            | 1.02<br>±0.08 | 1.37<br>±0.45 | 0.91<br>±0.18 | 0.68<br>±0.12   | 1.52<br>±0.63 | 1.82<br>±0.38 | 9.06<br>±1.09   |
| <i>Phvul.002G019100</i> | Heat stress transcription factor B-1                                                                                        | 0.49<br>±0.05            | 0.41<br>±0.16 | 1.15<br>±0.21 | 1.3<br>±0.23  | 0.38<br>±0.06   | 0.46<br>±0.12 | 1.53<br>±0.45 | 10.84<br>±3.52  |
| <i>Phvul.002G021800</i> | Reticulon-like protein B13                                                                                                  | 0<br>±0                  | 0.02<br>±0.02 | 0<br>±0       | 0<br>±0       | 0<br>±0         | 0.05<br>±0.03 | 0.08<br>±0.08 | 0.72<br>±0.69   |

Table S5 continued

| Gene ID                                                                           | Gene Annotation                                                                         | Transcript levels (FPKM) |               |               |               |                        |               |                |                 |
|-----------------------------------------------------------------------------------|-----------------------------------------------------------------------------------------|--------------------------|---------------|---------------|---------------|------------------------|---------------|----------------|-----------------|
|                                                                                   |                                                                                         | Mock inoculation         |               |               |               | <i>Xap</i> inoculation |               |                |                 |
|                                                                                   |                                                                                         | 0 h PI                   | 8 h PI        | 24 h PI       | 48 h PI       | 0 h PI                 | 8 h PI        | 24 h PI        | 48 h PI         |
| <i>Phvul.002G025000</i>                                                           | Premnaspirodiene oxygenase                                                              | 0.1<br>±0.03             | 0.07<br>±0.05 | 0.24<br>±0.17 | 0.27<br>±0.08 | 0.02<br>±0.02          | 0.08<br>±0.06 | 0.61<br>±0.28  | 2.75<br>±0.36   |
| <i>Phvul.002G029900</i>                                                           | No functional annotation                                                                | 0.08<br>±0.08            | 0.11<br>±0.03 | 0.14<br>±0.09 | 0.24<br>±0.12 | 0.08<br>±0.08          | 0.05<br>±0.02 | 0.11<br>±0.06  | 10.94<br>±9.62  |
| <i>Phvul.002G039100</i> ,<br><i>Phvul.002G039166</i> ,<br><i>Phvul.002G039232</i> | Chalcone synthase                                                                       | 0.4<br>±0.13             | 0.52<br>±0.24 | 0.67<br>±0.2  | 0.43<br>±0.15 | 0.17<br>±0.08          | 0.44<br>±0.22 | 1.64<br>±0.87  | 10.8<br>±1.31   |
| <i>Phvul.002G040100</i>                                                           | 4-Coumaroyl: coenzyme A<br>ligase 1                                                     | 10.37<br>±3.44           | 8.98<br>±3.32 | 8.9<br>±1     | 6.64<br>±0.54 | 15.25<br>±1.89         | 8.9<br>±2.92  | 10.43<br>±1.33 | 32.89<br>±4.72  |
| <i>Phvul.002G044100</i>                                                           | Diamine N-acetyltransferase /<br>spermidine N(1)-<br>acetyltransferase                  | 1.04<br>±0.27            | 1.87<br>±0.51 | 1.34<br>±0.43 | 2.58<br>±0.64 | 0.98<br>±0.1           | 1.51<br>±0.41 | 2.95<br>±0.78  | 13.23<br>±3.3   |
| <i>Phvul.002G046100</i>                                                           | Protein kinase domain // S-<br>locus glycoprotein domain //<br>D-mannose binding lectin | 0.16<br>±0.05            | 0.12<br>±0.03 | 0.11<br>±0.01 | 0.23<br>±0.03 | 0.09<br>±0.05          | 0.07<br>±0.01 | 0.19<br>±0.08  | 0.94<br>±0.05   |
| <i>Phvul.002G046500</i>                                                           | Protein kinase domain // S-<br>locus glycoprotein domain //<br>D-mannose binding lectin | 0.22<br>±0.02            | 0.23<br>±0.11 | 0.16<br>±0.01 | 0.56<br>±0.34 | 0.16<br>±0.01          | 0.18<br>±0.04 | 0.46<br>±0.14  | 2.84<br>±0.64   |
| <i>Phvul.002G048100</i>                                                           | Tryptophan synthase $\beta$ chain-<br>like protein                                      | 1.53<br>±0.3             | 1.99<br>±1.46 | 1.64<br>±0.39 | 1.34<br>±0.09 | 0.99<br>±0.18          | 0.92<br>±0.24 | 2.01<br>±0.31  | 19.36<br>±10.16 |
| <i>Phvul.002G075600</i>                                                           | No functional annotation                                                                | 0<br>±0                  | 0<br>±0       | 0<br>±0       | 0<br>±0       | 0<br>±0                | 0<br>±0       | 0<br>±0        | 0.61<br>±0.33   |
| <i>Phvul.002G075900</i>                                                           | No functional annotation                                                                | 0.02<br>±0.02            | 0<br>±0       | 0.04<br>±0.02 | 0.07<br>±0.01 | 0<br>±0                | 0.11<br>±0.03 | 0.35<br>±0.14  | 0.93<br>±0.08   |
| <i>Phvul.002G076500</i>                                                           | Neutrophil collagenase /<br>Matrix metalloproteinase 8                                  | 0<br>±0                  | 0.02<br>±0.02 | 0.03<br>±0.03 | 0<br>±0       | 0<br>±0                | 0<br>±0       | 0.13<br>±0.06  | 3.37<br>±0.37   |

Table S5 continued

| Gene ID                 | Gene Annotation                                       | Transcript levels (FPKM) |                  |                |                 |                  |                  |                  |                   |
|-------------------------|-------------------------------------------------------|--------------------------|------------------|----------------|-----------------|------------------|------------------|------------------|-------------------|
|                         |                                                       | Mock inoculation         |                  |                |                 | Xap inoculation  |                  |                  |                   |
|                         |                                                       | 0 h PI                   | 8 h PI           | 24 h PI        | 48 h PI         | 0 h PI           | 8 h PI           | 24 h PI          | 48 h PI           |
| <i>Phvul.002G076600</i> | Matrilysin / Uterine metalloendopeptidase             | 0.2<br>±0.08             | 0.02<br>±0.02    | 0.56<br>±0.4   | 0.29<br>±0.16   | 0.09<br>±0.05    | 0.13<br>±0.09    | 0.44<br>±0.25    | 5.64<br>±0.88     |
| <i>Phvul.002G082300</i> | Regulator of Vps4 activity in the MVB pathway protein | 2.11<br>±0.3             | 2.47<br>±0.64    | 2.17<br>±0.12  | 3.11<br>±1.24   | 3.47<br>±0.41    | 3.16<br>±0.39    | 6.21<br>±2.04    | 17.96<br>±8.89    |
| <i>Phvul.002G083900</i> | Calcium-binding protein CML30-related                 | 0.27<br>±0.06            | 0.3<br>±0.09     | 0.37<br>±0.14  | 0.08<br>±0.01   | 0.2<br>±0.08     | 0.4<br>±0.08     | 0.5<br>±0.18     | 3.82<br>±0.67     |
| <i>Phvul.002G113000</i> | Amino acid transporter                                | 3.71<br>±2.04            | 6.02<br>±1.7     | 4.66<br>±1.31  | 6.14<br>±0.28   | 1.63<br>±0.32    | 6.41<br>±2.39    | 7.71<br>±1.97    | 27.13<br>±0.53    |
| <i>Phvul.002G144600</i> | Cinnamyl alcohol dehydrogenase 6-related              | 0.21<br>±0.09            | 0.17<br>±0.12    | 0.24<br>±0.12  | 0.3<br>±0.17    | 0<br>±0          | 0.05<br>±0.03    | 0.16<br>±0.07    | 4.41<br>±1.04     |
| <i>Phvul.002G154600</i> | MATE efflux family protein                            | 0.01<br>±0.01            | 0.01<br>±0.01    | 0.02<br>±0.02  | 0.14<br>±0.14   | 0.01<br>±0.01    | 0.04<br>±0.01    | 0.17<br>±0.12    | 1.09<br>±0.62     |
| <i>Phvul.002G155500</i> | Thaumatococcus family                                 | 172.86<br>±40.76         | 185.61<br>±21.54 | 133.5<br>±9.89 | 165.9<br>±29.15 | 162.42<br>±39.58 | 233.18<br>±13.23 | 176.62<br>±35.67 | 941.24<br>±138.86 |
| <i>Phvul.002G160600</i> | Protein LURP-one-related 17                           | 1.85<br>±0.44            | 0.96<br>±0.23    | 1.27<br>±0     | 2.25<br>±1.18   | 2.13<br>±0.49    | 1.57<br>±0.47    | 2.27<br>±0.67    | 11.17<br>±6.51    |
| <i>Phvul.002G180900</i> | BON1-associated protein 1-related                     | 0.03<br>±0.03            | 0.03<br>±0.03    | 0.22<br>±0.17  | 0.25<br>±0.13   | 0<br>±0          | 0.19<br>±0.1     | 0.39<br>±0.2     | 6.29<br>±0.76     |
| <i>Phvul.002G184300</i> | Chalcone synthase                                     | 0.22<br>±0.09            | 0.28<br>±0.06    | 0.49<br>±0.18  | 0.37<br>±0.04   | 0.2<br>±0.1      | 0.68<br>±0.32    | 1.32<br>±0.65    | 3.95<br>±0.33     |
| <i>Phvul.002G188800</i> | LYSM domain-containing GPI-anchored protein 2         | 9.97<br>±0.54            | 10.16<br>±3.52   | 8.05<br>±0.06  | 9.97<br>±0.59   | 11.34<br>±0.72   | 11.06<br>±1.19   | 12.56<br>±1.65   | 45.08<br>±5.1     |
| <i>Phvul.002G197800</i> | Stress up-regulated Nod 19                            | 3.14<br>±1.09            | 3.23<br>±0.9     | 3.89<br>±0.53  | 4.54<br>±0.44   | 1.67<br>±0.38    | 4.09<br>±1.45    | 4.7<br>±0.88     | 26.44<br>±9.34    |
| <i>Phvul.002G199800</i> | Tetrahydroberberine oxidase                           | 0.17<br>±0.09            | 0.04<br>±0.02    | 0.49<br>±0.17  | 0.32<br>±0.09   | 0<br>±0          | 0.06<br>±0.01    | 0.75<br>±0.39    | 22.13<br>±1.24    |
| <i>Phvul.002G209400</i> | Pathogenesis-related protein Bet v I family           | 1.23<br>±0.57            | 1.7<br>±0.3      | 3.24<br>±1.24  | 1.86<br>±0.84   | 0.74<br>±0.14    | 1.49<br>±0.6     | 5.01<br>±1.6     | 56.05<br>±1.95    |

Table S5 continued

| Gene ID                 | Gene Annotation                                                                  | Transcript levels (FPKM) |               |               |               |                 |               |                |                  |
|-------------------------|----------------------------------------------------------------------------------|--------------------------|---------------|---------------|---------------|-----------------|---------------|----------------|------------------|
|                         |                                                                                  | Mock inoculation         |               |               |               | Xap inoculation |               |                |                  |
|                         |                                                                                  | 0 h PI                   | 8 h PI        | 24 h PI       | 48 h PI       | 0 h PI          | 8 h PI        | 24 h PI        | 48 h PI          |
| <i>Phvul.002G209500</i> | Pathogenesis-related protein<br>Bet v I family                                   | 3.42<br>±1.7             | 3.55<br>±0.1  | 11.8<br>±2.73 | 9.59<br>±2.36 | 1.46<br>±0.21   | 5.99<br>±2.06 | 16.15<br>±2.88 | 167.31<br>±10.04 |
| <i>Phvul.002G209600</i> | Protein of unknown function                                                      | 0.19<br>±0.02            | 0.29<br>±0.09 | 0.15<br>±0.03 | 0.15<br>±0.04 | 0.44<br>±0.12   | 0.31<br>±0.09 | 0.27<br>±0.05  | 1.42<br>±1.03    |
| <i>Phvul.002G215000</i> | Legume lectin domain /<br>Protein tyrosine kinase                                | 0.18<br>±0.03            | 0.17<br>±0.03 | 0.26<br>±0.05 | 0.25<br>±0.1  | 0.13<br>±0.04   | 0.16<br>±0.06 | 0.53<br>±0.35  | 3.3<br>±1.62     |
| <i>Phvul.002G215100</i> | Protein tyrosine kinase /<br>Leucine rich repeat N-<br>terminal domain (LRRNT_2) | 0.06<br>±0.02            | 0.05<br>±0.02 | 0.11<br>±0.03 | 0.16<br>±0.02 | 0.02<br>±0.01   | 0.06<br>±0.01 | 0.15<br>±0.04  | 1.2<br>±0.29     |
| <i>Phvul.002G217900</i> | Protein kinase domain //<br>Leucine rich repeat N-<br>terminal domain (LRRNT_2)  | 0.08<br>±0.05            | 0.1<br>±0.03  | 0.1<br>±0.08  | 0.36<br>±0.11 | 0.02<br>±0.02   | 0.04<br>±0.02 | 0.18<br>±0.08  | 1.6<br>±0.12     |
| <i>Phvul.002G219300</i> | (3S,6E)-Nerolidol synthase                                                       | 1.85<br>±0.16            | 2.68<br>±1.51 | 2.66<br>±0.78 | 2.27<br>±0.56 | 1.72<br>±0.43   | 1.32<br>±0.33 | 3.22<br>±0.7   | 10.74<br>±3.27   |
| <i>Phvul.002G223400</i> | NADH: ubiquinone reductase<br>(non-electrogenic)                                 | 0.41<br>±0.09            | 0.36<br>±0.15 | 0.41<br>±0.03 | 0.4<br>±0.08  | 0.39<br>±0.08   | 0.4<br>±0.08  | 1.1<br>±0.36   | 2.78<br>±0.65    |
| <i>Phvul.002G239400</i> | Leucine-rich repeat receptor-<br>like protein kinase                             | 1.3<br>±0.05             | 1.44<br>±0.26 | 1.25<br>±0.09 | 1.31<br>±0.08 | 1.28<br>±0.32   | 1.66<br>±0.06 | 1.63<br>±0.33  | 5.26<br>±1.56    |
| <i>Phvul.002G258600</i> | Copine (calcium-dependent<br>phospholipid-binding protein)<br>family protein     | 2.63<br>±0.13            | 3.46<br>±0.66 | 1.74<br>±0.07 | 2.51<br>±0.23 | 2.46<br>±0.25   | 2.92<br>±0.28 | 3.63<br>±0.49  | 11.14<br>±2.65   |
| <i>Phvul.002G259900</i> | Protein of unknown function                                                      | 0.39<br>±0.06            | 0.31<br>±0.1  | 0.22<br>±0.05 | 0.29<br>±0.08 | 0.17<br>±0.08   | 0.48<br>±0.13 | 0.28<br>±0.05  | 1.48<br>±0.42    |
| <i>Phvul.002G265400</i> | WRKY transcription factor<br>50-related                                          | 3.76<br>±0.21            | 4.89<br>±1.3  | 3.48<br>±0.34 | 5.48<br>±1.73 | 5.71<br>±0.47   | 5.03<br>±0.85 | 7.63<br>±3.24  | 38.57<br>±11.44  |
| <i>Phvul.002G268100</i> | No functional annotation                                                         | 0.69<br>±0.27            | 0.78<br>±0.28 | 0.32<br>±0.13 | 0.89<br>±0.39 | 1.23<br>±0.26   | 0.9<br>±0.35  | 0.7<br>±0.27   | 4.61<br>±2.73    |

Table S5 continued

| Gene ID                                              | Gene Annotation                                                                       | Transcript levels (FPKM) |                 |                |                |                 |                |                |                 |
|------------------------------------------------------|---------------------------------------------------------------------------------------|--------------------------|-----------------|----------------|----------------|-----------------|----------------|----------------|-----------------|
|                                                      |                                                                                       | Mock inoculation         |                 |                |                | Xap inoculation |                |                |                 |
|                                                      |                                                                                       | 0 h PI                   | 8 h PI          | 24 h PI        | 48 h PI        | 0 h PI          | 8 h PI         | 24 h PI        | 48 h PI         |
| <i>Phvul.002G269300</i>                              | Histone H3                                                                            | 8.51<br>±1.66            | 10.18<br>±1.74  | 3.91<br>±0.06  | 2.93<br>±0.73  | 10.44<br>±2.1   | 13.72<br>±0.42 | 5<br>±0.98     | 15.03<br>±2.7   |
| <i>Phvul.002G271900</i>                              | No functional annotation                                                              | 0.07<br>±0.03            | 0.03<br>±0.03   | 0.03<br>±0.02  | 0<br>±0        | 0<br>±0         | 0<br>±0        | 0<br>±0        | 1.24<br>±0.93   |
| <i>Phvul.002G285800</i>                              | WRKY transcription factor<br>45-related                                               | 0.15<br>±0.09            | 0.13<br>±0.01   | 0.63<br>±0.27  | 1.32<br>±0.43  | 0.12<br>±0.13   | 0.18<br>±0.1   | 1.52<br>±0.88  | 13.62<br>±7.11  |
| <i>Phvul.002G286500</i> ,<br><i>Phvul.002G286600</i> | Thaumatococcus family                                                                 | 36.94<br>±5.61           | 40.16<br>±14.23 | 20.53<br>±3.79 | 17.93<br>±3.06 | 42.08<br>±7.34  | 48.86<br>±8.22 | 22.22<br>±2.92 | 121.64<br>±6.39 |
| <i>Phvul.002G317000</i>                              | MYB-like DNA-binding<br>protein                                                       | 0.23<br>±0.08            | 0.8<br>±0.43    | 1.42<br>±0.47  | 1.42<br>±0.63  | 0.22<br>±0.12   | 0.51<br>±0.11  | 1.92<br>±0.72  | 17.6<br>±5.65   |
| <i>Phvul.002G318000</i>                              | Core-2/I-branching $\beta$ -1,6-N-<br>acetylglucosaminyltransferase<br>family protein | 1<br>±0.17               | 0.93<br>±0.08   | 0.8<br>±0.05   | 0.71<br>±0.2   | 0.86<br>±0.27   | 1.26<br>±0.2   | 1.03<br>±0.06  | 3.04<br>±0.51   |
| <i>Phvul.002G318100</i>                              | Protein SAR deficient 1                                                               | 3.62<br>±0.16            | 4.43<br>±1.45   | 2.44<br>±0.16  | 3.36<br>±1.02  | 4.28<br>±0.51   | 4.24<br>±0.46  | 5.91<br>±1.46  | 31.67<br>±13.13 |
| <i>Phvul.002G318200</i>                              | Protein tyrosine kinase //<br>Wall-associated receptor<br>kinase C-terminal           | 1<br>±0.06               | 0.99<br>±0.05   | 0.79<br>±0.09  | 0.83<br>±0.19  | 0.77<br>±0.13   | 0.88<br>±0.2   | 1.03<br>±0.17  | 3.63<br>±1.21   |
| <i>Phvul.002G326600</i>                              | Aminocyclopropane-<br>carboxylate oxidase                                             | 6.96<br>±1.99            | 8.24<br>±3.67   | 5.47<br>±1.17  | 8.04<br>±3.48  | 8.25<br>±1.63   | 7.07<br>±1.65  | 12.12<br>±4.17 | 77.29<br>±30.27 |
| <i>Phvul.002G329200</i>                              | RAS-related protein<br>RABA6A-related                                                 | 0.48<br>±0.16            | 0.27<br>±0.08   | 0.55<br>±0.14  | 0.38<br>±0.08  | 0.47<br>±0.12   | 0.35<br>±0.02  | 0.54<br>±0.06  | 2.15<br>±1.1    |
| <i>Phvul.003G012800</i>                              | AR781                                                                                 | 0.2<br>±0.06             | 0.15<br>±0.05   | 0.37<br>±0.17  | 0.33<br>±0.18  | 0.06<br>±0.03   | 0.15<br>±0.08  | 0.37<br>±0.17  | 2.19<br>±0.08   |
| <i>Phvul.003G019800</i>                              | Nudix hydrolase 17,<br>mitochondrial-related                                          | 0<br>±0                  | 0<br>±0         | 0<br>±0        | 0<br>±0        | 0<br>±0         | 0<br>±0        | 0.05<br>±0.05  | 0.61<br>±0.44   |
| <i>Phvul.003G022400</i>                              | Copper transport protein<br>ATOX1-related                                             | 0.3<br>±0.08             | 0.99<br>±0.31   | 0.51<br>±0.11  | 0.56<br>±0.17  | 0.25<br>±0.08   | 0.66<br>±0.12  | 0.74<br>±0.32  | 3.63<br>±0.75   |

Table S5 continued

| Gene ID                 | Gene Annotation                                                                        | Transcript levels (FPKM) |                 |               |               |                 |                |                |                 |
|-------------------------|----------------------------------------------------------------------------------------|--------------------------|-----------------|---------------|---------------|-----------------|----------------|----------------|-----------------|
|                         |                                                                                        | Mock inoculation         |                 |               |               | Xap inoculation |                |                |                 |
|                         |                                                                                        | 0 h PI                   | 8 h PI          | 24 h PI       | 48 h PI       | 0 h PI          | 8 h PI         | 24 h PI        | 48 h PI         |
| <i>Phvul.003G022500</i> | No functional annotation                                                               | 8.75<br>±1.1             | 11.88<br>±5.05  | 5<br>±0.93    | 6.72<br>±0.49 | 7.34<br>±2.29   | 8.85<br>±1.07  | 8.42<br>±1.26  | 43.1<br>±8.5    |
| <i>Phvul.003G024200</i> | Phospholipid-transporting<br>ATPase 10-related                                         | 0.37<br>±0.09            | 0.37<br>±0.14   | 0.46<br>±0.07 | 0.57<br>±0.05 | 0.39<br>±0.03   | 0.37<br>±0.05  | 0.58<br>±0.09  | 3.93<br>±0.32   |
| <i>Phvul.003G029400</i> | No functional annotation                                                               | 0.41<br>±0.19            | 0.23<br>±0.18   | 0.45<br>±0.09 | 0.39<br>±0.15 | 0.09<br>±0.02   | 0.13<br>±0.02  | 0.28<br>±0.09  | 1.7<br>±0.96    |
| <i>Phvul.003G034000</i> | E3 ubiquitin-protein ligase<br>RHA2                                                    | 1.11<br>±0.38            | 1.45<br>±0.17   | 0.59<br>±0.23 | 0.99<br>±0.2  | 0.97<br>±0.29   | 0.27<br>±0.14  | 1.28<br>±0.64  | 5.57<br>±2.96   |
| <i>Phvul.003G051900</i> | Auxin response factor 30-<br>related                                                   | 0.06<br>±0.06            | 0.15<br>±0.15   | 0<br>±0       | 0<br>±0       | 0<br>±0         | 0.42<br>±0.36  | 0.46<br>±0.25  | 1.55<br>±0.43   |
| <i>Phvul.003G074000</i> | Isoflavone synthase                                                                    | 0.05<br>±0.03            | 0.19<br>±0.03   | 0.42<br>±0.21 | 0.18<br>±0.03 | 0.1<br>±0.03    | 0.21<br>±0.1   | 0.67<br>±0.45  | 1.23<br>±0.18   |
| <i>Phvul.003G079800</i> | Adenylyl-sulfate reductase /<br>Thioredoxin-dependent 5'-<br>adenylylsulfate reductase | 0.16<br>±0.02            | 0.16<br>±0.04   | 0.24<br>±0.14 | 0.13<br>±0.05 | 0.29<br>±0.12   | 0.13<br>±0.02  | 0.21<br>±0.04  | 0.96<br>±0.48   |
| <i>Phvul.003G088000</i> | Adenine nucleotide $\alpha$ -<br>hydrolases-like superfamily<br>protein                | 0.09<br>±0.02            | 0.23<br>±0.11   | 0.35<br>±0.17 | 0.22<br>±0.08 | 0.12<br>±0.09   | 0.15<br>±0.06  | 0.28<br>±0.09  | 2.23<br>±0.29   |
| <i>Phvul.003G096700</i> | Late embryogenesis abundant<br>3 family protein                                        | 3.13<br>±0.21            | 1.72<br>±0.44   | 7.96<br>±2    | 9.41<br>±2.88 | 2.31<br>±0.96   | 1.68<br>±0.18  | 8.23<br>±2.04  | 89.58<br>±60.55 |
| <i>Phvul.003G104400</i> | C2 domain-containing<br>protein-related                                                | 14.7<br>±9.62            | 25.73<br>±10.15 | 4.23<br>±0.46 | 9.62<br>±2.52 | 5.04<br>±0.86   | 23.55<br>±8.86 | 11.04<br>±2.88 | 38.95<br>±5.38  |
| <i>Phvul.003G107100</i> | E3 ubiquitin-protein ligase<br>ATL41-related                                           | 1.13<br>±0.32            | 0.95<br>±0.25   | 1.18<br>±0.26 | 1.46<br>±0.14 | 1.32<br>±0.13   | 1.4<br>±0.5    | 1.19<br>±0.35  | 7.57<br>±2.36   |
| <i>Phvul.003G109000</i> | Pathogenesis-related protein<br>Bet V I family                                         | 0.51<br>±0.12            | 0.75<br>±0.11   | 1.2<br>±0.62  | 1.24<br>±0.38 | 0.46<br>±0.09   | 1.27<br>±0.36  | 3.2<br>±1.65   | 27.88<br>±5.69  |
| <i>Phvul.003G109200</i> | Pathogenesis-related protein<br>Bet V I family                                         | 0.49<br>±0.48            | 0.9<br>±0.31    | 0.91<br>±0.38 | 0.73<br>±0.11 | 0.07<br>±0.03   | 0.69<br>±0.34  | 1.46<br>±0.76  | 12.18<br>±0.92  |

Table S5 continued

| Gene ID                                              | Gene Annotation                                                                                               | Transcript levels (FPKM) |               |               |               |                 |               |               |                 |
|------------------------------------------------------|---------------------------------------------------------------------------------------------------------------|--------------------------|---------------|---------------|---------------|-----------------|---------------|---------------|-----------------|
|                                                      |                                                                                                               | Mock inoculation         |               |               |               | Xap inoculation |               |               |                 |
|                                                      |                                                                                                               | 0 h PI                   | 8 h PI        | 24 h PI       | 48 h PI       | 0 h PI          | 8 h PI        | 24 h PI       | 48 h PI         |
| <i>Phvul.003G109300</i>                              | Pathogenesis-related protein<br>Bet V I family                                                                | 0<br>±0                  | 0.06<br>±0.06 | 0<br>±0       | 0<br>±0       | 0<br>±0         | 0.04<br>±0.03 | 0.02<br>±0.02 | 0.78<br>±0.09   |
| <i>Phvul.003G109600</i>                              | Pathogenesis-related protein<br>Bet V I family                                                                | 0.1<br>±0.05             | 0.08<br>±0.05 | 0.37<br>±0.2  | 0.2<br>±0.11  | 0<br>±0         | 0.16<br>±0.08 | 0.36<br>±0.18 | 4.18<br>±0.33   |
| <i>Phvul.003G109602</i>                              | Pathogenesis-related protein<br>Bet V I family                                                                | 0.06<br>±0.06            | 0.08<br>±0.04 | 0.25<br>±0.07 | 0.22<br>±0.12 | 0<br>±0         | 0.14<br>±0.08 | 0.32<br>±0.17 | 5.29<br>±0.15   |
| <i>Phvul.003G109603</i>                              | Pathogenesis-related protein<br>Bet V I family                                                                | 0.28<br>±0.22            | 0.18<br>±0.14 | 0.14<br>±0.08 | 0.22<br>±0.08 | 0<br>±0         | 0.22<br>±0.11 | 0.43<br>±0.23 | 6.07<br>±0.24   |
| <i>Phvul.003G109800</i>                              | Pathogenesis-related protein<br>Bet V I family                                                                | 0.03<br>±0.03            | 0.02<br>±0.02 | 0.21<br>±0.1  | 0.19<br>±0.1  | 0<br>±0         | 0.03<br>±0.03 | 0.43<br>±0.16 | 3.8<br>±0.47    |
| <i>Phvul.003G126300</i>                              | Saccharopine dehydrogenase<br>(NADP <sup>(+)</sup> , L-lysine-forming) /<br>Lysine-ketoglutarate<br>reductase | 0.69<br>±0.08            | 0.74<br>±0.09 | 0.9<br>±0.08  | 1.52<br>±0.19 | 0.58<br>±0.16   | 0.88<br>±0.1  | 1.34<br>±0.34 | 8.44<br>±3.79   |
| <i>Phvul.003G129200</i>                              | Protein TIFY 10a-related                                                                                      | 0.49<br>±0.21            | 0.5<br>±0.23  | 0.92<br>±0.11 | 0.85<br>±0.31 | 0.95<br>±0.2    | 0.76<br>±0.25 | 1.12<br>±0.28 | 3.7<br>±1.57    |
| <i>Phvul.003G136400</i>                              | Gulonolactone oxidase                                                                                         | 0.08<br>±0.03            | 0.08<br>±0.07 | 0.12<br>±0.04 | 0.11<br>±0.05 | 0.1<br>±0.05    | 0.1<br>±0.06  | 0.27<br>±0.1  | 2.13<br>±0.43   |
| <i>Phvul.003G140800</i>                              | Helix-loop-helix DNA-<br>binding domain                                                                       | 1.95<br>±0.27            | 3.42<br>±0.68 | 2.42<br>±0.06 | 2.25<br>±0.29 | 2.46<br>±0.29   | 2.31<br>±0.18 | 4.86<br>±1.29 | 9.64<br>±2.44   |
| <i>Phvul.003G146700</i>                              | β-1,3-N-<br>acetylglucosaminyltransferase                                                                     | 0.21<br>±0.04            | 0.1<br>±0.02  | 0.18<br>±0.08 | 0.85<br>±0.43 | 0.45<br>±0.12   | 0.38<br>±0.18 | 1.13<br>±0.31 | 3.48<br>±1.23   |
| <i>Phvul.003G154800</i>                              | Heat shock 70 kDa protein 5                                                                                   | 1.42<br>±0.62            | 0.68<br>±0.12 | 5.52<br>±1.28 | 4.69<br>±1.69 | 2.13<br>±0.18   | 0.99<br>±0.55 | 4.69<br>±0.55 | 32.56<br>±19.83 |
| <i>Phvul.003G160900</i>                              | No functional annotation                                                                                      | 1.53<br>±0.45            | 1.91<br>±0.53 | 1.01<br>±0.13 | 3.58<br>±2.37 | 0.75<br>±0.12   | 1.84<br>±0.42 | 3.7<br>±1.64  | 20.72<br>±11.53 |
| <i>Phvul.003G166700</i> ,<br><i>Phvul.003G166800</i> | Blue copper protein                                                                                           | 3.39<br>±0.16            | 4.14<br>±0.16 | 2.97<br>±0.3  | 3.16<br>±0.51 | 2.91<br>±0.19   | 5.02<br>±0.69 | 5.34<br>±0.98 | 19.19<br>±5.14  |



Table S5 continued

| Gene ID                 | Gene Annotation                                                                                                                                 | Transcript levels (FPKM) |                    |                     |                     |                     |                     |                     |                      |
|-------------------------|-------------------------------------------------------------------------------------------------------------------------------------------------|--------------------------|--------------------|---------------------|---------------------|---------------------|---------------------|---------------------|----------------------|
|                         |                                                                                                                                                 | Mock inoculation         |                    |                     |                     | Xap inoculation     |                     |                     |                      |
|                         |                                                                                                                                                 | 0 h PI                   | 8 h PI             | 24 h PI             | 48 h PI             | 0 h PI              | 8 h PI              | 24 h PI             | 48 h PI              |
| <i>Phvul.003G182600</i> | Adenine nucleotide $\alpha$ -hydrolases-like protein-related                                                                                    | 0.31<br>$\pm 0.11$       | 0.38<br>$\pm 0.03$ | 0.37<br>$\pm 0.08$  | 0.46<br>$\pm 0.06$  | 0.1<br>$\pm 0.06$   | 0.31<br>$\pm 0.05$  | 0.73<br>$\pm 0.24$  | 2.5<br>$\pm 1.89$    |
| <i>Phvul.003G184200</i> | Ninja-family protein AFP1-related                                                                                                               | 0.06<br>$\pm 0.03$       | 0.39<br>$\pm 0.26$ | 0.21<br>$\pm 0.02$  | 0.22<br>$\pm 0.09$  | 0.09<br>$\pm 0.09$  | 0.04<br>$\pm 0.04$  | 0.29<br>$\pm 0.17$  | 3.27<br>$\pm 1.56$   |
| <i>Phvul.003G187200</i> | Protein kinase domain //<br>Leucine rich repeat (LRR_1)<br>// Leucine rich repeat N-terminal domain (LRRNT_2)<br>// Leucine rich repeat (LRR_8) | 0.16<br>$\pm 0.01$       | 0.21<br>$\pm 0.05$ | 0.2<br>$\pm 0.06$   | 0.2<br>$\pm 0.09$   | 0.22<br>$\pm 0.07$  | 0.24<br>$\pm 0.02$  | 0.39<br>$\pm 0.12$  | 1.83<br>$\pm 0.57$   |
| <i>Phvul.003G209101</i> | Malate synthase / Malic-condensing enzyme                                                                                                       | 0.08<br>$\pm 0.05$       | 0.2<br>$\pm 0.07$  | 0.39<br>$\pm 0.16$  | 0.78<br>$\pm 0.53$  | 0.01<br>$\pm 0.02$  | 0.11<br>$\pm 0.07$  | 1.1<br>$\pm 0.61$   | 13.73<br>$\pm 9.05$  |
| <i>Phvul.003G212600</i> | MATE efflux family protein                                                                                                                      | 0.09<br>$\pm 0.02$       | 0.16<br>$\pm 0.08$ | 0.12<br>$\pm 0.04$  | 0.21<br>$\pm 0.18$  | 0.06<br>$\pm 0.06$  | 0.22<br>$\pm 0.11$  | 0.45<br>$\pm 0.27$  | 1.87<br>$\pm 0.94$   |
| <i>Phvul.003G217100</i> | Probable lipid transfer (LTP_2)                                                                                                                 | 61.06<br>$\pm 3.62$      | 64.15<br>$\pm 7.3$ | 25.41<br>$\pm 2.92$ | 20.88<br>$\pm 2.46$ | 68.14<br>$\pm 6.93$ | 69.47<br>$\pm 2.25$ | 37.52<br>$\pm 5.91$ | 99.28<br>$\pm 12.11$ |
| <i>Phvul.003G237400</i> | Expressed protein                                                                                                                               | 28.25<br>$\pm 15.35$     | 9.09<br>$\pm 7.95$ | 26.34<br>$\pm 8.13$ | 21.15<br>$\pm 9.94$ | 31.69<br>$\pm 4.55$ | 11.07<br>$\pm 10.4$ | 21.35<br>$\pm 1.99$ | 95.47<br>$\pm 56.71$ |
| <i>Phvul.003G238700</i> | Auxin responsive GH3 gene family                                                                                                                | 0.36<br>$\pm 0.22$       | 0.47<br>$\pm 0.21$ | 0.66<br>$\pm 0.17$  | 1.06<br>$\pm 0.17$  | 0.09<br>$\pm 0.03$  | 0.41<br>$\pm 0.17$  | 1.48<br>$\pm 0.85$  | 11.47<br>$\pm 1.77$  |
| <i>Phvul.003G239800</i> | No functional annotation                                                                                                                        | 1.03<br>$\pm 0.58$       | 0.66<br>$\pm 0.33$ | 0.93<br>$\pm 0.35$  | 1.63<br>$\pm 0.91$  | 0.46<br>$\pm 0.32$  | 0.65<br>$\pm 0.27$  | 2.09<br>$\pm 0.58$  | 32.86<br>$\pm 9.66$  |
| <i>Phvul.003G247500</i> | Leucine-rich repeat-containing protein                                                                                                          | 0.06<br>$\pm 0.02$       | 0.01<br>$\pm 0.01$ | 0.18<br>$\pm 0.06$  | 0.12<br>$\pm 0.05$  | 0.02<br>$\pm 0.02$  | 0.04<br>$\pm 0.02$  | 0.19<br>$\pm 0.12$  | 9.3<br>$\pm 1.4$     |
| <i>Phvul.003G249400</i> | No functional annotation                                                                                                                        | 4.47<br>$\pm 1.72$       | 3.92<br>$\pm 1.44$ | 1.63<br>$\pm 0.31$  | 0.55<br>$\pm 0.28$  | 5.59<br>$\pm 1.07$  | 3.33<br>$\pm 1.1$   | 1.21<br>$\pm 0.1$   | 2.72<br>$\pm 1.56$   |
| <i>Phvul.003G251000</i> | Calcium-binding protein CML41-related                                                                                                           | 3.4<br>$\pm 0.14$        | 5.27<br>$\pm 1.32$ | 5.04<br>$\pm 0.77$  | 4.71<br>$\pm 0.21$  | 2.74<br>$\pm 0.56$  | 2.89<br>$\pm 0.28$  | 4.83<br>$\pm 0.18$  | 18.85<br>$\pm 1.92$  |

Table S5 continued

| Gene ID                                              | Gene Annotation                                                                                                            | Transcript levels (FPKM) |               |               |               |                 |               |               |                 |
|------------------------------------------------------|----------------------------------------------------------------------------------------------------------------------------|--------------------------|---------------|---------------|---------------|-----------------|---------------|---------------|-----------------|
|                                                      |                                                                                                                            | Mock inoculation         |               |               |               | Xap inoculation |               |               |                 |
|                                                      |                                                                                                                            | 0 h PI                   | 8 h PI        | 24 h PI       | 48 h PI       | 0 h PI          | 8 h PI        | 24 h PI       | 48 h PI         |
| <i>Phvul.003G255300</i>                              | No functional annotation                                                                                                   | 0<br>±0                  | 0<br>±0       | 0<br>±0       | 0<br>±0       | 0<br>±0         | 0<br>±0       | 0.12<br>±0.08 | 1.29<br>±0.45   |
| <i>Phvul.003G256600</i>                              | BCS1 AAA-type ATPase                                                                                                       | 4.93<br>±0.88            | 4.58<br>±2.26 | 2.56<br>±0.42 | 3.96<br>±0.69 | 4.81<br>±0.43   | 4<br>±0.69    | 4.45<br>±0.96 | 20.16<br>±7.82  |
| <i>Phvul.003G272900</i>                              | (-)-Lariciresinol reductase                                                                                                | 2.75<br>±0.37            | 3.8<br>±0.65  | 2.46<br>±0.22 | 2.75<br>±0.42 | 2.34<br>±0.18   | 4.02<br>±1.17 | 4.45<br>±0.99 | 12.89<br>±1.99  |
| <i>Phvul.003G287400</i> ,<br><i>Phvul.003G287500</i> | Alcohol dehydrogenase<br>related                                                                                           | 10.63<br>±4.35           | 8.63<br>±5.7  | 8.51<br>±1.26 | 6.6<br>±0.54  | 11.58<br>±1.15  | 4.87<br>±2.32 | 9.8<br>±1.39  | 39.19<br>±21.39 |
| <i>Phvul.004G018900</i>                              | α-Dioxygenase (DOX1)                                                                                                       | 0.12<br>±0.04            | 0.1<br>±0.05  | 0.77<br>±0.33 | 0.31<br>±0.09 | 0.01<br>±0.01   | 0.04<br>±0.03 | 0.68<br>±0.57 | 2.52<br>±1.05   |
| <i>Phvul.004G044800</i> ,<br><i>Phvul.004G044900</i> | Leucine rich repeat (LRR_1)<br>// Leucine rich repeat N-<br>terminal domain (LRRNT_2)<br>// Leucine rich repeat<br>(LRR_8) | 0.15<br>±0.03            | 0.22<br>±0.04 | 0.19<br>±0.02 | 0.14<br>±0.05 | 0.11<br>±0.03   | 0.15<br>±0.02 | 0.35<br>±0.01 | 0.75<br>±0.27   |
| <i>Phvul.004G056700</i>                              | Amino acid transporter                                                                                                     | 0.63<br>±0.18            | 0.46<br>±0.16 | 0.75<br>±0.07 | 0.61<br>±0.06 | 0.63<br>±0.21   | 0.5<br>±0.12  | 0.93<br>±0.32 | 9.55<br>±1.47   |
| <i>Phvul.004G071700</i>                              | MLO-like protein 12-related                                                                                                | 0.14<br>±0.08            | 0.14<br>±0.04 | 0.25<br>±0.11 | 0.35<br>±0.05 | 0.15<br>±0.02   | 0.15<br>±0.05 | 0.46<br>±0.12 | 2.46<br>±0.34   |
| <i>Phvul.004G077400</i>                              | No apical meristem (NAM)<br>protein                                                                                        | 0.12<br>±0.07            | 0.21<br>±0.1  | 0.23<br>±0.05 | 0.75<br>±0.16 | 0.07<br>±0.03   | 0.41<br>±0.23 | 0.53<br>±0.1  | 4.72<br>±2      |
| <i>Phvul.004G088400</i>                              | Alliin lyase / L-cysteine<br>sulfoxide lyase                                                                               | 0.46<br>±0.16            | 0.29<br>±0.08 | 1.05<br>±0.55 | 0.54<br>±0.21 | 0.03<br>±0.03   | 0.17<br>±0.07 | 0.98<br>±0.33 | 29.28<br>±2.25  |
| <i>Phvul.004G092100</i>                              | Ethylene-responsive<br>transcription factor 15-related                                                                     | 0.27<br>±0.15            | 0.36<br>±0.09 | 0.45<br>±0.17 | 0.44<br>±0.14 | 0.07<br>±0.04   | 0.61<br>±0.33 | 0.83<br>±0.32 | 2.85<br>±1.36   |

Table S5 continued

| Gene ID                                              | Gene Annotation                                                                                                     | Transcript levels (FPKM) |               |               |               |                 |               |               |                |
|------------------------------------------------------|---------------------------------------------------------------------------------------------------------------------|--------------------------|---------------|---------------|---------------|-----------------|---------------|---------------|----------------|
|                                                      |                                                                                                                     | Mock inoculation         |               |               |               | Xap inoculation |               |               |                |
|                                                      |                                                                                                                     | 0 h PI                   | 8 h PI        | 24 h PI       | 48 h PI       | 0 h PI          | 8 h PI        | 24 h PI       | 48 h PI        |
| <i>Phvul.004G099100</i>                              | Leucine rich repeat (LRR_1)<br>// Leucine rich repeat N-terminal domain (LRRNT_2)<br>// Leucine rich repeat (LRR_8) | 1.35<br>±0.58            | 1.85<br>±0.46 | 0.68<br>±0.09 | 1.26<br>±0.08 | 0.78<br>±0.24   | 1.45<br>±0.5  | 1.28<br>±0.22 | 9.37<br>±2.55  |
| <i>Phvul.004G103900</i>                              | Isoflavone 7-O-glucosyltransferase                                                                                  | 0.34<br>±0.12            | 0.38<br>±0.13 | 0.54<br>±0.03 | 0.26<br>±0.02 | 0.47<br>±0.17   | 0.41<br>±0.06 | 0.69<br>±0.36 | 1.32<br>±0.27  |
| <i>Phvul.004G107200</i>                              | Copper transport family protein-related                                                                             | 8.8<br>±0.7              | 8.99<br>±3.99 | 3.68<br>±0.63 | 5.64<br>±1.21 | 12.74<br>±2.11  | 7.37<br>±0.54 | 7.98<br>±1.25 | 30.51<br>±16.6 |
| <i>Phvul.004G115600</i>                              | Leucine rich repeat (LRR_1)<br>// Leucine rich repeat (LRR_8)                                                       | 0.22<br>±0.04            | 0.28<br>±0.07 | 0.23<br>±0.06 | 0.22<br>±0.04 | 0.07<br>±0.02   | 0.38<br>±0.18 | 0.23<br>±0.03 | 1.34<br>±0.03  |
| <i>Phvul.004G129300</i> ,<br><i>Phvul.004G129400</i> | PPR repeat (PPR) // PPR repeat (PPR_1) // PPR repeat family (PPR_2) // Pentatricopeptide repeat domain (PPR_3)      | 0.48<br>±0.33            | 0.98<br>±0.31 | 0.82<br>±0.14 | 0.33<br>±0.12 | 0.47<br>±0.2    | 0.98<br>±0.39 | 0.69<br>±0.15 | 1.4<br>±0.62   |
| <i>Phvul.004G141200</i>                              | ADP-ribosylation factor GTPase-activating protein AGD15-related                                                     | 0.29<br>±0.08            | 0.26<br>±0.08 | 0.27<br>±0.06 | 0.53<br>±0.18 | 0.54<br>±0.15   | 0.34<br>±0.07 | 1.04<br>±0.32 | 2.44<br>±0.66  |
| <i>Phvul.004G153056</i>                              | No functional annotation                                                                                            | 0.73<br>±0.73            | 1.48<br>±0.77 | 3.89<br>±1.47 | 2.03<br>±1.22 | 0.31<br>±0.31   | 0.64<br>±0.64 | 7.1<br>±2.15  | 53.29<br>±6.4  |
| <i>Phvul.004G155900</i>                              | Protein SAR deficient 1                                                                                             | 0.13<br>±0.05            | 0.2<br>±0.08  | 0.1<br>±0.01  | 0.28<br>±0.07 | 0.08<br>±0.08   | 0.17<br>±0.09 | 0.31<br>±0.04 | 1.2<br>±0.17   |
| <i>Phvul.004G157900</i>                              | Protein NIM1-interacting 2                                                                                          | 2.89<br>±0.99            | 3.79<br>±0.92 | 0.88<br>±0.08 | 0.76<br>±0.17 | 1.16<br>±0.32   | 3.04<br>±0.87 | 0.77<br>±0.25 | 3.12<br>±0.31  |
| <i>Phvul.005G011100</i>                              | Phospholipid-transporting ATPase                                                                                    | 0.1<br>±0.03             | 0.09<br>±0.02 | 0.28<br>±0.05 | 0.25<br>±0.05 | 0.09<br>±0.03   | 0.06<br>±0.01 | 0.39<br>±0.16 | 1.59<br>±0.17  |

Table S5 continued

| Gene ID                 | Gene Annotation                                               | Transcript levels (FPKM) |                |                |                |                        |               |                |                 |
|-------------------------|---------------------------------------------------------------|--------------------------|----------------|----------------|----------------|------------------------|---------------|----------------|-----------------|
|                         |                                                               | Mock inoculation         |                |                |                | <i>Xap</i> inoculation |               |                |                 |
|                         |                                                               | 0 h PI                   | 8 h PI         | 24 h PI        | 48 h PI        | 0 h PI                 | 8 h PI        | 24 h PI        | 48 h PI         |
| <i>Phvul.005G024800</i> | VQ motif                                                      | 1.83<br>±0.15            | 2.33<br>±0.59  | 1.57<br>±0.09  | 2.3<br>±1.76   | 2.27<br>±0.42          | 2.97<br>±0.95 | 3.38<br>±0.32  | 13.41<br>±3.57  |
| <i>Phvul.005G042200</i> | No functional annotation                                      | 0.33<br>±0.18            | 0.03<br>±0.03  | 0.4<br>±0.14   | 0.54<br>±0.46  | 0<br>±0                | 0.07<br>±0.04 | 0.57<br>±0.29  | 5.27<br>±2.15   |
| <i>Phvul.005G057200</i> | Expressed protein                                             | 0.82<br>±0.42            | 0.54<br>±0.43  | 0.6<br>±0.31   | 1.31<br>±0.89  | 1.12<br>±0.24          | 1<br>±0.17    | 2.18<br>±0.96  | 17.1<br>±11.51  |
| <i>Phvul.005G077501</i> | Oxidoreductase, 2-oxoglutarate-Fe II oxygenase family protein | 0.43<br>±0.13            | 0.23<br>±0.05  | 0.78<br>±0.13  | 0.54<br>±0.16  | 0.35<br>±0.06          | 0.25<br>±0.1  | 1.05<br>±0.55  | 3.18<br>±1.05   |
| <i>Phvul.005G097500</i> | E3 ubiquitin-protein ligase ATL41                             | 0.58<br>±0.2             | 1.16<br>±0.3   | 0.4<br>±0.25   | 0.65<br>±0.19  | 0.31<br>±0.07          | 0.9<br>±0.29  | 0.89<br>±0.21  | 2.69<br>±0.09   |
| <i>Phvul.005G109000</i> | Transferase family                                            | 1.35<br>±0.13            | 1.57<br>±0.72  | 0.9<br>±0.24   | 1.57<br>±0.46  | 1.19<br>±0.18          | 0.95<br>±0.2  | 1.73<br>±0.44  | 19.43<br>±4.61  |
| <i>Phvul.005G111500</i> | Geranyl diphosphate diphosphatase                             | 0.46<br>±0.26            | 0.29<br>±0.21  | 0.61<br>±0.12  | 0.3<br>±0.12   | 0.6<br>±0.14           | 0.16<br>±0.09 | 0.71<br>±0.32  | 1.59<br>±0.72   |
| <i>Phvul.005G136700</i> | MLO protein                                                   | 0.11<br>±0.06            | 0.19<br>±0.03  | 0.08<br>±0.02  | 0.2<br>±0.02   | 0.14<br>±0.08          | 0.14<br>±0.1  | 0.1<br>±0.03   | 1.49<br>±0.18   |
| <i>Phvul.005G137300</i> | LOB domain-containing protein 1-related                       | 0.18<br>±0.02            | 0.29<br>±0.06  | 0.63<br>±0.1   | 0.36<br>±0.04  | 0.16<br>±0.06          | 0.23<br>±0.11 | 0.45<br>±0.09  | 1.66<br>±0.12   |
| <i>Phvul.005G155800</i> | Chitinase-related                                             | 10.85<br>±1.26           | 10.96<br>±3.19 | 11.57<br>±0.56 | 13.63<br>±1.16 | 12<br>±1.04            | 12.99<br>±0.7 | 19.76<br>±1.98 | 119.1<br>±11.06 |
| <i>Phvul.005G158500</i> | β-Fructofuranosidase, insoluble isoenzyme CWINV1-related      | 1.15<br>±0.55            | 1.28<br>±0.15  | 2.16<br>±0.34  | 2.6<br>±0.65   | 0.66<br>±0.03          | 1.49<br>±0.59 | 2.55<br>±0.32  | 11.17<br>±0.72  |
| <i>Phvul.005G166500</i> | ABC transporter G family member 29                            | 0.12<br>±0.03            | 0.17<br>±0.06  | 0.2<br>±0.05   | 0.34<br>±0.11  | 0.16<br>±0.01          | 0.18<br>±0.02 | 0.42<br>±0.07  | 3.87<br>±0.32   |

Table S5 continued

| Gene ID                 | Gene Annotation                                                                                      | Transcript levels (FPKM) |                    |                    |                    |                        |                    |                    |                     |
|-------------------------|------------------------------------------------------------------------------------------------------|--------------------------|--------------------|--------------------|--------------------|------------------------|--------------------|--------------------|---------------------|
|                         |                                                                                                      | Mock inoculation         |                    |                    |                    | <i>Xap</i> inoculation |                    |                    |                     |
|                         |                                                                                                      | 0 h PI                   | 8 h PI             | 24 h PI            | 48 h PI            | 0 h PI                 | 8 h PI             | 24 h PI            | 48 h PI             |
| <i>Phvul.005G171900</i> | U5 SNRNP-specific protein-like factor and related proteins // G protein $\beta$ subunit-like protein | 2.14<br>$\pm 0.5$        | 2.53<br>$\pm 1.43$ | 0.52<br>$\pm 0.08$ | 0.73<br>$\pm 0.29$ | 3.01<br>$\pm 0.8$      | 2.22<br>$\pm 0.55$ | 1.09<br>$\pm 0.33$ | 14.86<br>$\pm 4.66$ |
| <i>Phvul.005G173000</i> | Auxin-responsive protein IAA15                                                                       | 0.56<br>$\pm 0.04$       | 0.57<br>$\pm 0.19$ | 0.86<br>$\pm 0.16$ | 0.8<br>$\pm 0.42$  | 0.65<br>$\pm 0.12$     | 0.6<br>$\pm 0.16$  | 0.89<br>$\pm 0.09$ | 3.96<br>$\pm 3.04$  |
| <i>Phvul.005G173600</i> | Sulfate-transporting ATPase                                                                          | 1.13<br>$\pm 0.25$       | 1.51<br>$\pm 0.39$ | 1.93<br>$\pm 0.78$ | 1.58<br>$\pm 0.23$ | 0.81<br>$\pm 0.14$     | 1.7<br>$\pm 0.43$  | 2.76<br>$\pm 0.98$ | 17.38<br>$\pm 2.49$ |
| <i>Phvul.006G002700</i> | Genomic DNA, chromosome 3, P1 clone: MKA23                                                           | 1.92<br>$\pm 0.43$       | 2.18<br>$\pm 0.51$ | 1.96<br>$\pm 0.24$ | 4.21<br>$\pm 2.07$ | 0.72<br>$\pm 0.15$     | 1.89<br>$\pm 0.32$ | 4.46<br>$\pm 1.05$ | 17.43<br>$\pm 3.6$  |
| <i>Phvul.006G020700</i> | Interleukin-1 receptor-associated kinase 4                                                           | 1.03<br>$\pm 0.1$        | 1.11<br>$\pm 0.23$ | 0.93<br>$\pm 0.21$ | 1.98<br>$\pm 0.78$ | 0.9<br>$\pm 0.24$      | 1.11<br>$\pm 0.21$ | 2.72<br>$\pm 1$    | 8.21<br>$\pm 0.95$  |
| <i>Phvul.006G022800</i> | Aspartyl protease-like protein                                                                       | 0.6<br>$\pm 0.14$        | 0.43<br>$\pm 0.09$ | 0.43<br>$\pm 0.08$ | 1.3<br>$\pm 0.83$  | 1.15<br>$\pm 0.18$     | 0.56<br>$\pm 0.16$ | 1.61<br>$\pm 0.54$ | 6.01<br>$\pm 2.79$  |
| <i>Phvul.006G058700</i> | X-box transcription factor-related                                                                   | 0.1<br>$\pm 0.06$        | 0.12<br>$\pm 0.03$ | 0.13<br>$\pm 0.05$ | 0.12<br>$\pm 0.05$ | 0.08<br>$\pm 0.02$     | 0.18<br>$\pm 0.08$ | 0.22<br>$\pm 0.08$ | 1.12<br>$\pm 0.06$  |
| <i>Phvul.006G074600</i> | WRKY transcription factor 33                                                                         | 0.08<br>$\pm 0.02$       | 0.11<br>$\pm 0.05$ | 0.18<br>$\pm 0.1$  | 0.09<br>$\pm 0.02$ | 0.07<br>$\pm 0.03$     | 0.04<br>$\pm 0.03$ | 0.14<br>$\pm 0.08$ | 2.68<br>$\pm 0.13$  |
| <i>Phvul.006G078300</i> | No functional annotation                                                                             | 0.27<br>$\pm 0.14$       | 0.26<br>$\pm 0.14$ | 1.1<br>$\pm 0.61$  | 0.84<br>$\pm 0.58$ | 0<br>$\pm 0$           | 0.71<br>$\pm 0.43$ | 1.35<br>$\pm 0.73$ | 50.32<br>$\pm 1.95$ |
| <i>Phvul.006G079500</i> | Oxalate-CoA ligase / Oxalyl-CoA synthetase                                                           | 0.03<br>$\pm 0.03$       | 0.01<br>$\pm 0.01$ | 0.1<br>$\pm 0.06$  | 0<br>$\pm 0$       | 0.01<br>$\pm 0.01$     | 0.05<br>$\pm 0.02$ | 0.22<br>$\pm 0.13$ | 0.91<br>$\pm 0.53$  |
| <i>Phvul.006G079700</i> | Trans-cinnamate 4-monooxygenase / Cinnamic acid 4-monooxygenase                                      | 0.18<br>$\pm 0.07$       | 0.2<br>$\pm 0.06$  | 0.26<br>$\pm 0.14$ | 0.32<br>$\pm 0.24$ | 0.25<br>$\pm 0.06$     | 0.24<br>$\pm 0.09$ | 0.59<br>$\pm 0.16$ | 4.18<br>$\pm 0.49$  |
| <i>Phvul.006G085200</i> | P-loop containing nucleoside triphosphate hydrolases superfamily protein                             | 0.81<br>$\pm 0.25$       | 0.68<br>$\pm 0.48$ | 0.58<br>$\pm 0.06$ | 0.51<br>$\pm 0.07$ | 0.98<br>$\pm 0.1$      | 0.48<br>$\pm 0.27$ | 0.49<br>$\pm 0.08$ | 3.69<br>$\pm 0.8$   |

Table S5 continued

| Gene ID                                              | Gene Annotation                                | Transcript levels (FPKM) |                 |                |                 |                 |                 |                 |                  |
|------------------------------------------------------|------------------------------------------------|--------------------------|-----------------|----------------|-----------------|-----------------|-----------------|-----------------|------------------|
|                                                      |                                                | Mock inoculation         |                 |                |                 | Xap inoculation |                 |                 |                  |
|                                                      |                                                | 0 h PI                   | 8 h PI          | 24 h PI        | 48 h PI         | 0 h PI          | 8 h PI          | 24 h PI         | 48 h PI          |
| <i>Phvul.006G086100</i>                              | AMP-binding enzyme                             | 3.5<br>±0.68             | 5.15<br>±0.95   | 2.01<br>±0.22  | 2.23<br>±0.62   | 2.74<br>±0.64   | 4.98<br>±0.66   | 3.61<br>±0.82   | 18.34<br>±7.39   |
| <i>Phvul.006G086200</i> ,<br><i>Phvul.006G086211</i> | No functional annotation                       | 0.82<br>±0.28            | 1.06<br>±0.44   | 0.62<br>±0.03  | 1.25<br>±0.46   | 0.69<br>±0.21   | 1<br>±0.25      | 1.33<br>±0.27   | 6.04<br>±1.98    |
| <i>Phvul.006G090200</i>                              | Respiratory burst oxidase<br>homolog protein B | 0.83<br>±0.18            | 0.8<br>±0.06    | 0.76<br>±0.15  | 1.21<br>±0.43   | 1.36<br>±0.09   | 1.44<br>±0.22   | 2.34<br>±0.81   | 6.96<br>±3.08    |
| <i>Phvul.006G102200</i>                              | Hevein-like preproprotein                      | 21.03<br>±4.55           | 28.96<br>±4.85  | 14.63<br>±2.89 | 21.22<br>±2.73  | 16.78<br>±2.63  | 28.09<br>±5.79  | 21.47<br>±5.8   | 127.81<br>±17.59 |
| <i>Phvul.006G102300</i>                              | Hevein-like preproprotein                      | 91.09<br>±11.4           | 92.58<br>±21.55 | 91.71<br>±5.23 | 84.31<br>±10.74 | 81.62<br>±18.82 | 94.07<br>±11.93 | 99.37<br>±14.05 | 513.25<br>±9.39  |
| <i>Phvul.006G129500</i>                              | Peroxidase 22-related                          | 0.4<br>±0.31             | 0.41<br>±0.16   | 1.37<br>±0.46  | 0.87<br>±0.04   | 0.21<br>±0.05   | 0.15<br>±0.09   | 1.79<br>±0.53   | 53.74<br>±4.05   |
| <i>Phvul.006G135600</i>                              | Copper transport protein,<br>ATOX1-related     | 1.34<br>±0.31            | 1.64<br>±1.17   | 0.54<br>±0.13  | 0.75<br>±0.2    | 1.28<br>±0.35   | 1.02<br>±0.35   | 0.92<br>±0.31   | 11.97<br>±6.18   |
| <i>Phvul.006G142300</i>                              | Auxin-induced in root<br>cultures protein 12   | 4.62<br>±0.53            | 4.62<br>±0.66   | 4.19<br>±0.63  | 6.16<br>±1.74   | 3.55<br>±0.4    | 5.71<br>±0.78   | 7.83<br>±1.73   | 29.32<br>±6.52   |
| <i>Phvul.006G154700</i>                              | Epididymal membrane<br>protein E9-related      | 0.73<br>±0.1             | 0.6<br>±0.03    | 1.53<br>±0.35  | 2.53<br>±0.43   | 0.85<br>±0.18   | 0.85<br>±0.11   | 2.58<br>±0.73   | 14.55<br>±2.3    |
| <i>Phvul.006G173000</i>                              | No functional annotation                       | 0.78<br>±0.24            | 1.09<br>±0.33   | 0.37<br>±0.13  | 1<br>±0.58      | 0.21<br>±0.11   | 1.62<br>±0.48   | 1.3<br>±0.46    | 8.35<br>±3.12    |
| <i>Phvul.006G178800</i>                              | E3 ubiquitin-protein ligase<br>ATL41           | 2.33<br>±0.1             | 2.12<br>±0.21   | 2.6<br>±0.37   | 2.61<br>±0.72   | 2.13<br>±0.49   | 2.28<br>±0.06   | 4.13<br>±0.55   | 11.9<br>±1.69    |
| <i>Phvul.006G181300</i>                              | Glutaredoxin-C9                                | 0.88<br>±0.32            | 0.78<br>±0.21   | 0.56<br>±0.06  | 1.42<br>±1.1    | 0.46<br>±0.15   | 1.4<br>±0.07    | 2.22<br>±0.37   | 12.78<br>±6.21   |
| <i>Phvul.006G185300</i>                              | Lipoxygenase                                   | 0.19<br>±0.14            | 0.43<br>±0.09   | 0.11<br>±0.05  | 0.05<br>±0.01   | 0.11<br>±0.04   | 0.3<br>±0.08    | 0.13<br>±0.08   | 2.94<br>±2.41    |
| <i>Phvul.006G188900</i>                              | No apical meristem (NAM)<br>protein            | 0.02<br>±0.02            | 0.05<br>±0.02   | 0.23<br>±0.12  | 0.27<br>±0.2    | 0.02<br>±0.02   | 0.07<br>±0.05   | 0.13<br>±0.05   | 2<br>±1.37       |

Table S5 continued

| Gene ID                                              | Gene Annotation                                                                                                      | Transcript levels (FPKM) |                 |                |                |                 |                |                |                  |
|------------------------------------------------------|----------------------------------------------------------------------------------------------------------------------|--------------------------|-----------------|----------------|----------------|-----------------|----------------|----------------|------------------|
|                                                      |                                                                                                                      | Mock inoculation         |                 |                |                | Xap inoculation |                |                |                  |
|                                                      |                                                                                                                      | 0 h PI                   | 8 h PI          | 24 h PI        | 48 h PI        | 0 h PI          | 8 h PI         | 24 h PI        | 48 h PI          |
| <i>Phvul.006G192400</i>                              | EF hand (EF-hand_1) /<br>Pyridine nucleotide-<br>disulphide oxidoreductase                                           | 0.31<br>±0.1             | 0.32<br>±0.09   | 0.47<br>±0.1   | 0.43<br>±0.06  | 0.24<br>±0.08   | 0.39<br>±0.1   | 0.73<br>±0.22  | 1.77<br>±0.16    |
| <i>Phvul.006G194200</i>                              | β-Amyrin synthase (LUP4)                                                                                             | 1.11<br>±0.16            | 0.68<br>±0.19   | 0.61<br>±0.21  | 0.25<br>±0.13  | 0.8<br>±0.06    | 0.52<br>±0.06  | 0.58<br>±0.07  | 1.17<br>±0.97    |
| <i>Phvul.006G194600</i>                              | Receptor-like serine/<br>Threonine-protein kinase<br>SD1-6-related                                                   | 0.18<br>±0.08            | 0.26<br>±0.09   | 0.28<br>±0.02  | 0.26<br>±0.08  | 0.23<br>±0.03   | 0.33<br>±0.06  | 0.42<br>±0.13  | 2.06<br>±0.38    |
| <i>Phvul.006G195600</i> ,<br><i>Phvul.006G195700</i> | S-Linalool synthase                                                                                                  | 5.9<br>±1.06             | 7.77<br>±1.41   | 1.35<br>±0.28  | 0.78<br>±0.12  | 10.4<br>±0.63   | 9.15<br>±1.04  | 2.57<br>±1.33  | 7.22<br>±3.2     |
| <i>Phvul.006G198200</i>                              | Protein kinase domain //<br>Leucine rich repeat N-<br>terminal domain (LRRNT_2)<br>// Leucine rich repeat<br>(LRR 8) | 0.58<br>±0.16            | 0.86<br>±0.14   | 0.81<br>±0.08  | 0.84<br>±0.05  | 0.53<br>±0.06   | 0.94<br>±0.05  | 1.08<br>±0.17  | 3.42<br>±0.57    |
| <i>Phvul.007G008600</i>                              | Chalcone isomerase                                                                                                   | 6.74<br>±1.26            | 7.98<br>±1.57   | 7.3<br>±1.5    | 7.39<br>±0.35  | 7.66<br>±1.29   | 10.73<br>±1.64 | 14.37<br>±5.18 | 74.24<br>±2.89   |
| <i>Phvul.007G016100</i>                              | EamA-like transporter family                                                                                         | 0.17<br>±0.05            | 0.25<br>±0.12   | 0.16<br>±0.06  | 0.26<br>±0.08  | 0.14<br>±0.12   | 0.12<br>±0.04  | 0.33<br>±0.03  | 1.32<br>±0.65    |
| <i>Phvul.007G022600</i>                              | Replication factor A3                                                                                                | 2.16<br>±0.92            | 3.81<br>±0.65   | 1.98<br>±0.29  | 0.94<br>±0.54  | 2.31<br>±0.38   | 4.11<br>±0.62  | 1.94<br>±0.14  | 3.77<br>±0.4     |
| <i>Phvul.007G024900</i>                              | Monocarboxylate transporter                                                                                          | 0.08<br>±0.04            | 0.23<br>±0.03   | 0.36<br>±0.08  | 0.36<br>±0.09  | 0.05<br>±0.03   | 0.3<br>±0.13   | 0.44<br>±0.1   | 6.22<br>±0.38    |
| <i>Phvul.007G026700</i>                              | Genomic DNA, chromosome<br>3, P1 clone: MPE11                                                                        | 4.22<br>±2.18            | 5.52<br>±1.56   | 1.89<br>±0.2   | 3.45<br>±1.15  | 2.03<br>±0.28   | 5.31<br>±1.79  | 4.06<br>±1.15  | 16.51<br>±7.4    |
| <i>Phvul.007G040900</i>                              | Peptidase of plants and<br>bacteria                                                                                  | 37.05<br>±3.99           | 35.39<br>±11.93 | 27.25<br>±1.55 | 33.58<br>±9.83 | 40.3<br>±8.69   | 41.34<br>±6.95 | 41.44<br>±9.05 | 240.01<br>±32.57 |
| <i>Phvul.007G041000</i>                              | Peptidase of plants and<br>bacteria                                                                                  | 18.42<br>±3.21           | 16.7<br>±6.21   | 5.6<br>±0.32   | 6.97<br>±1.33  | 17.77<br>±4.35  | 16.75<br>±2.32 | 8.85<br>±1.18  | 36.8<br>±2.45    |

Table S5 continued

| Gene ID                                                                           | Gene Annotation                                                                              | Transcript levels (FPKM) |               |               |               |                        |               |               |                 |
|-----------------------------------------------------------------------------------|----------------------------------------------------------------------------------------------|--------------------------|---------------|---------------|---------------|------------------------|---------------|---------------|-----------------|
|                                                                                   |                                                                                              | Mock inoculation         |               |               |               | <i>Xap</i> inoculation |               |               |                 |
|                                                                                   |                                                                                              | 0 h PI                   | 8 h PI        | 24 h PI       | 48 h PI       | 0 h PI                 | 8 h PI        | 24 h PI       | 48 h PI         |
| <i>Phvul.007G048500</i> ,<br><i>Phvul.007G048600</i>                              | Cysteine-rich receptor-like<br>protein kinase 28-related                                     | 1.87<br>±0.16            | 2.08<br>±0.28 | 1.28<br>±0.11 | 1.66<br>±0.14 | 2.1<br>±0.27           | 2.45<br>±0.44 | 1.96<br>±0.18 | 10.4<br>±2.67   |
| <i>Phvul.007G048800</i>                                                           | Cysteine-rich receptor-like<br>protein kinase 28-related                                     | 0.31<br>±0.06            | 0.2<br>±0.04  | 0.22<br>±0.05 | 0.27<br>±0.1  | 0.23<br>±0.08          | 0.28<br>±0.05 | 0.37<br>±0.12 | 1.6<br>±0.49    |
| <i>Phvul.007G048900</i> ,<br><i>Phvul.007G049100</i> ,<br><i>Phvul.007G049200</i> | Cysteine-rich receptor-like<br>protein kinase 28-related; salt<br>stress response/antifungal | 5.06<br>±2.01            | 7.25<br>±1.23 | 2.46<br>±0.7  | 3.25<br>±0.61 | 6<br>±0.53             | 7.58<br>±1.1  | 4.28<br>±1.05 | 14.15<br>±1.81  |
| <i>Phvul.007G049700</i>                                                           | Cysteine-rich repeat secretory<br>protein 1-related                                          | 0.41<br>±0.22            | 0.19<br>±0.16 | 1.89<br>±0.88 | 1.05<br>±0.51 | 0<br>±0                | 0.17<br>±0.17 | 1.74<br>±1.18 | 59.51<br>±3.16  |
| <i>Phvul.007G052500</i>                                                           | Cysteine-rich receptor-like<br>protein kinase 28-related                                     | 0.06<br>±0.01            | 0.12<br>±0.05 | 0.15<br>±0.05 | 0.09<br>±0.03 | 0.13<br>±0.01          | 0.1<br>±0.05  | 0.07<br>±0.02 | 1<br>±0.06      |
| <i>Phvul.007G091000</i>                                                           | Isoliquiritigenin 2'- <i>O</i> -<br>methyltransferase                                        | 0.26<br>±0.13            | 0.43<br>±0.09 | 0.31<br>±0.12 | 0.23<br>±0.09 | 0.11<br>±0.06          | 0.25<br>±0.08 | 0.76<br>±0.25 | 3.77<br>±0.11   |
| <i>Phvul.007G101400</i>                                                           | No functional annotation                                                                     | 0.43<br>±0.13            | 0.27<br>±0.16 | 0.88<br>±0.29 | 0.84<br>±0.13 | 0.38<br>±0.23          | 0.62<br>±0.1  | 0.92<br>±0.21 | 3.6<br>±0.34    |
| <i>Phvul.007G123958</i>                                                           | Endoglucanase 7                                                                              | 0.42<br>±0.08            | 0.21<br>±0.05 | 0.39<br>±0.08 | 0.46<br>±0.05 | 0.2<br>±0.03           | 0.25<br>±0.01 | 0.43<br>±0.07 | 3.31<br>±0.43   |
| <i>Phvul.007G134700</i>                                                           | Glutathione S-transferase,<br>GST, superfamily, GST<br>domain containing                     | 0.92<br>±0.61            | 1.4<br>±0.23  | 1.43<br>±0.47 | 0.84<br>±0.28 | 0.69<br>±0.13          | 1.28<br>±0.38 | 2.02<br>±0.25 | 13.81<br>±0.74  |
| <i>Phvul.007G160901</i>                                                           | Leucine-rich repeat-<br>containing protein                                                   | 0.31<br>±0.13            | 0.48<br>±0.1  | 0.12<br>±0.03 | 0.16<br>±0.06 | 0.32<br>±0.03          | 0.44<br>±0.14 | 0.3<br>±0.09  | 0.8<br>±0.4     |
| <i>Phvul.007G186900</i>                                                           | No functional annotation                                                                     | 0.56<br>±0.08            | 0.49<br>±0.18 | 0.48<br>±0.11 | 0.82<br>±0.23 | 0.71<br>±0.18          | 0.6<br>±0.25  | 0.67<br>±0.23 | 11.68<br>±0.72  |
| <i>Phvul.007G211600</i>                                                           | Protein NIM1-interacting 1                                                                   | 2.53<br>±0.87            | 2.24<br>±0.65 | 1.02<br>±0.09 | 1.38<br>±0.42 | 1.38<br>±0.27          | 2.61<br>±0.88 | 3.72<br>±1.91 | 22.17<br>±13.28 |



Table S5 continued

| Gene ID                 | Gene Annotation                                             | Transcript levels (FPKM) |               |               |               |                        |               |               |                 |
|-------------------------|-------------------------------------------------------------|--------------------------|---------------|---------------|---------------|------------------------|---------------|---------------|-----------------|
|                         |                                                             | Mock inoculation         |               |               |               | <i>Xap</i> inoculation |               |               |                 |
|                         |                                                             | 0 h PI                   | 8 h PI        | 24 h PI       | 48 h PI       | 0 h PI                 | 8 h PI        | 24 h PI       | 48 h PI         |
| <i>Phvul.007G220400</i> | No functional annotation                                    | 2.11<br>±0.84            | 1.74<br>±1.39 | 5.08<br>±0.29 | 4.85<br>±1.54 | 2.29<br>±0.38          | 1.14<br>±0.12 | 6.8<br>±1.11  | 27.99<br>±9.22  |
| <i>Phvul.007G222500</i> | Ethylene-responsive transcription factor ERF016-related     | 0.15<br>±0.15            | 0.23<br>±0.12 | 0<br>±0       | 0<br>±0       | 0<br>±0                | 0.05<br>±0.02 | 0<br>±0       | 0.77<br>±0.48   |
| <i>Phvul.007G252500</i> | PR5-like receptor kinase-related                            | 0.26<br>±0.08            | 0.19<br>±0.06 | 0.25<br>±0.06 | 0.28<br>±0.03 | 0.18<br>±0.04          | 0.24<br>±0.04 | 0.24<br>±0.06 | 1.21<br>±0.36   |
| <i>Phvul.007G259400</i> | Late embryogenesis abundant protein 4-5                     | 0.31<br>±0.1             | 0.18<br>±0.07 | 0.11<br>±0.06 | 0.25<br>±0.09 | 0.48<br>±0.12          | 0.18<br>±0.02 | 0.21<br>±0.1  | 8.3<br>±7.11    |
| <i>Phvul.007G260400</i> | L-type lectin-domain containing receptor kinase S.5-related | 0.14<br>±0.12            | 0.09<br>±0.02 | 0.18<br>±0.05 | 0.52<br>±0.16 | 0.08<br>±0.04          | 0.23<br>±0.1  | 0.24<br>±0.12 | 2.13<br>±0.32   |
| <i>Phvul.007G273000</i> | Ethylene-responsive transcription factor 1B                 | 1.51<br>±0.22            | 1.94<br>±0.37 | 1.12<br>±0.14 | 2.49<br>±1.36 | 1.64<br>±0.43          | 1.88<br>±0.32 | 2.26<br>±0.6  | 14.24<br>±2.62  |
| <i>Phvul.007G278900</i> | Calcium binding protein                                     | 3.36<br>±0.72            | 3.22<br>±1.4  | 2.97<br>±0.88 | 2.93<br>±1.24 | 3.86<br>±0.69          | 3.89<br>±0.59 | 6.77<br>±1.02 | 31.71<br>±11.13 |
| <i>Phvul.008G008800</i> | No functional annotation                                    | 0.14<br>±0.1             | 0.08<br>±0.08 | 0.33<br>±0.17 | 0.13<br>±0.02 | 0<br>±0                | 0.13<br>±0.07 | 0.15<br>±0.08 | 1.16<br>±0.18   |
| <i>Phvul.008G011400</i> | Heat shock protein 70 kDa                                   | 0.27<br>±0.03            | 0.29<br>±0.13 | 0.23<br>±0.09 | 0.29<br>±0.04 | 0.33<br>±0.11          | 0.29<br>±0.01 | 0.3<br>±0.05  | 1.59<br>±0.29   |
| <i>Phvul.008G011500</i> | Thioredoxin                                                 | 0.15<br>±0.08            | 0.17<br>±0.09 | 0.28<br>±0.15 | 0.35<br>±0.06 | 0.31<br>±0.03          | 0.29<br>±0.11 | 0.64<br>±0.09 | 4.07<br>±0.4    |
| <i>Phvul.008G011800</i> | Thioredoxin                                                 | 0.06<br>±0.03            | 0.05<br>±0.05 | 0.14<br>±0.03 | 0.13<br>±0.02 | 0.08<br>±0.01          | 0.13<br>±0.05 | 0.4<br>±0.05  | 4.07<br>±0.42   |
| <i>Phvul.008G011900</i> | Heat shock protein 70 kDa                                   | 0.29<br>±0.08            | 0.29<br>±0.1  | 0.24<br>±0.03 | 0.2<br>±0.03  | 0.26<br>±0.06          | 0.32<br>±0.08 | 0.36<br>±0.09 | 1.48<br>±0.23   |

Table S5 continued

| Gene ID                 | Gene Annotation                                          | Transcript levels (FPKM) |                |               |                |                 |               |                |                 |
|-------------------------|----------------------------------------------------------|--------------------------|----------------|---------------|----------------|-----------------|---------------|----------------|-----------------|
|                         |                                                          | Mock inoculation         |                |               |                | Xap inoculation |               |                |                 |
|                         |                                                          | 0 h PI                   | 8 h PI         | 24 h PI       | 48 h PI        | 0 h PI          | 8 h PI        | 24 h PI        | 48 h PI         |
| <i>Phvul.008G014600</i> | C2H2-type zinc finger                                    | 0.07<br>±0.03            | 0.1<br>±0.06   | 0.37<br>±0.03 | 0.63<br>±0.23  | 0<br>±0         | 0.07<br>±0.06 | 0.5<br>±0.24   | 2.85<br>±0.48   |
| <i>Phvul.008G015800</i> | 6'-Deoxychalcone synthase                                | 0.89<br>±0.83            | 1.15<br>±0.34  | 0.83<br>±0.13 | 0.9<br>±0.23   | 0.14<br>±0.09   | 1.11<br>±0.57 | 0.92<br>±0.09  | 17.93<br>±1.1   |
| <i>Phvul.008G028900</i> | UDP-arabinopyranose mutase                               | 3.46<br>±1.37            | 5.31<br>±0.99  | 1.34<br>±0.16 | 1.73<br>±0.56  | 2.7<br>±0.43    | 5.97<br>±1.88 | 2.24<br>±0.26  | 9.31<br>±2.36   |
| <i>Phvul.008G037300</i> | Calmodulin                                               | 5.3<br>±1.33             | 3.3<br>±1.15   | 3<br>±0.2     | 8.85<br>±5.39  | 4.35<br>±1.43   | 4.02<br>±1.19 | 9.38<br>±2.44  | 37.89<br>±14.74 |
| <i>Phvul.008G040800</i> | ATP-dependent zinc metalloprotease FTSH 6, chloroplastic | 0<br>±0                  | 0.01<br>±0.01  | 0.07<br>±0.01 | 0.05<br>±0.04  | 0.07<br>±0.03   | 0.02<br>±0.02 | 0.12<br>±0.04  | 0.64<br>±0.4    |
| <i>Phvul.008G043400</i> | Receptor like protein 54                                 | 0.11<br>±0.02            | 0.07<br>±0.01  | 0.1<br>±0.06  | 0.06<br>±0.03  | 0.03<br>±0.03   | 0.05<br>±0.01 | 0.03<br>±0.01  | 1.04<br>±0.63   |
| <i>Phvul.008G044900</i> | AAA-type ATPase family protein-related                   | 1.46<br>±0.08            | 2.38<br>±1.02  | 1.69<br>±0.18 | 2.26<br>±0.93  | 1.22<br>±0.24   | 1.93<br>±0.17 | 2.7<br>±0.99   | 15.86<br>±3.86  |
| <i>Phvul.008G048466</i> | Prenylated RAB acceptor 1-related                        | 13.29<br>±2.09           | 13.27<br>±4.81 | 7.31<br>±0.28 | 14.62<br>±3.05 | 9.16<br>±3.68   | 11.2<br>±2.44 | 15.72<br>±3.79 | 59.83<br>±23.74 |
| <i>Phvul.008G048532</i> | Prenylated RAB acceptor 1-related                        | 6.56<br>±1.32            | 6.99<br>±2.96  | 5.09<br>±0.88 | 5.97<br>±2.06  | 7.38<br>±2.15   | 7.74<br>±0.94 | 6.18<br>±1.55  | 35.87<br>±16.82 |
| <i>Phvul.008G076500</i> | Vestitone reductase                                      | 0.52<br>±0.06            | 0.4<br>±0.05   | 1<br>±0.3     | 0.78<br>±0.14  | 0.24<br>±0.01   | 0.68<br>±0.27 | 1.11<br>±0.46  | 7.5<br>±0.24    |
| <i>Phvul.008G076600</i> | Vestitone reductase                                      | 1.76<br>±0.81            | 2.45<br>±0.54  | 2.43<br>±0.52 | 3.34<br>±0.42  | 0.67<br>±0.1    | 2.54<br>±0.82 | 3.92<br>±0.83  | 36.27<br>±0.99  |
| <i>Phvul.008G094400</i> | GRAS domain family                                       | 0.05<br>±0.04            | 0.05<br>±0.04  | 0.05<br>±0.03 | 0.15<br>±0.1   | 0.05<br>±0.05   | 0.03<br>±0.02 | 0.11<br>±0.06  | 1.95<br>±0.77   |
| <i>Phvul.008G094500</i> | Protein kinase domain / Legume lectin domain             | 0.38<br>±0.14            | 0.32<br>±0.16  | 0.39<br>±0.09 | 0.82<br>±0.41  | 0.27<br>±0.04   | 0.18<br>±0.05 | 0.6<br>±0.08   | 3.35<br>±1.31   |
| <i>Phvul.008G094900</i> | Ammonium transporter 2                                   | 1.34<br>±0.27            | 1.19<br>±0.16  | 1.1<br>±0.08  | 1.79<br>±0.6   | 0.98<br>±0.22   | 1.29<br>±0.31 | 3.17<br>±1.02  | 11.57<br>±3.68  |

Table S5 continued

| Gene ID                 | Gene Annotation                                                                  | Transcript levels (FPKM) |                 |                  |                  |                  |                  |                 |                   |
|-------------------------|----------------------------------------------------------------------------------|--------------------------|-----------------|------------------|------------------|------------------|------------------|-----------------|-------------------|
|                         |                                                                                  | Mock inoculation         |                 |                  |                  | Xap inoculation  |                  |                 |                   |
|                         |                                                                                  | 0 h PI                   | 8 h PI          | 24 h PI          | 48 h PI          | 0 h PI           | 8 h PI           | 24 h PI         | 48 h PI           |
| <i>Phvul.008G098500</i> | Flavonol synthase                                                                | 0.02<br>±0.02            | 0.07<br>±0.03   | 0.07<br>±0.07    | 0.09<br>±0.06    | 0<br>±0          | 0.06<br>±0.04    | 0.17<br>±0.16   | 1.22<br>±0.55     |
| <i>Phvul.008G112200</i> | Laccase-7-related                                                                | 0.52<br>±0.12            | 0.6<br>±0.2     | 1.67<br>±0.69    | 0.69<br>±0.21    | 0.24<br>±0.05    | 0.71<br>±0.34    | 1.48<br>±0.84   | 11.42<br>±2.63    |
| <i>Phvul.008G114766</i> | No functional annotation                                                         | 0.4<br>±0.27             | 0.38<br>±0.31   | 0.44<br>±0.44    | 1.14<br>±0.76    | 0.46<br>±0.35    | 0.22<br>±0.14    | 1.95<br>±1.03   | 8.13<br>±6.03     |
| <i>Phvul.008G123900</i> | SNARE proteins                                                                   | 0.24<br>±0.09            | 0.21<br>±0.08   | 0.55<br>±0.2     | 0.43<br>±0.27    | 0.27<br>±0.11    | 0.15<br>±0.05    | 1.02<br>±0.29   | 9.73<br>±1.48     |
| <i>Phvul.008G127200</i> | Deacetoxyvindoline 4-<br>hydroxylase /<br>Desacetoxyvindoline-17-<br>hydroxylase | 0.95<br>±0.25            | 0.7<br>±0.14    | 1.18<br>±0.21    | 1.16<br>±0.31    | 0.63<br>±0.1     | 0.96<br>±0.12    | 1.57<br>±0.49   | 4.71<br>±1.41     |
| <i>Phvul.008G139900</i> | No functional annotation                                                         | 175.27<br>±67.05         | 232.13<br>±35.8 | 116.11<br>±20.67 | 137.25<br>±10.28 | 113.33<br>±33.12 | 261.54<br>±64.33 | 171.45<br>±53.6 | 1151.16<br>±76.66 |
| <i>Phvul.008G140113</i> | No functional annotation                                                         | 7.68<br>±4.32            | 11.59<br>±2.25  | 6.37<br>±1.67    | 7.5<br>±1.25     | 4.61<br>±1.62    | 13.87<br>±3.29   | 10.05<br>±3.59  | 142.24<br>±18.43  |
| <i>Phvul.008G140800</i> | Hydroquinone<br>glucosyltransferase                                              | 1.06<br>±0.3             | 1.78<br>±0.61   | 2.16<br>±0.55    | 2.31<br>±0.59    | 1.1<br>±0.25     | 1.69<br>±0.32    | 3.64<br>±0.93   | 15.9<br>±1.8      |
| <i>Phvul.008G169600</i> | LL-diaminopimelate<br>aminotransferase                                           | 0.86<br>±0.42            | 1.54<br>±0.33   | 1.46<br>±0.48    | 1.96<br>±1.15    | 0.44<br>±0.15    | 1.46<br>±0.52    | 2.65<br>±1.41   | 19.04<br>±2.33    |
| <i>Phvul.008G172400</i> | Trehalose-phosphate<br>phosphatase D-related                                     | 0.23<br>±0.04            | 0.22<br>±0.02   | 0.13<br>±0.03    | 0.14<br>±0.05    | 0.29<br>±0.03    | 0.18<br>±0.02    | 0.29<br>±0.07   | 4.65<br>±0.47     |
| <i>Phvul.008G176900</i> | Protein of unknown function                                                      | 0.64<br>±0.2             | 0.28<br>±0.06   | 0.12<br>±0.04    | 0.45<br>±0.24    | 0.36<br>±0.14    | 0.55<br>±0.29    | 0.36<br>±0.03   | 3.51<br>±0.91     |
| <i>Phvul.008G186200</i> | No functional annotation                                                         | 7.45<br>±4.71            | 2.61<br>±0.88   | 10.46<br>±2.42   | 11.82<br>±7.06   | 5.72<br>±1.82    | 3.62<br>±1.69    | 8.22<br>±1.65   | 73.58<br>±44.86   |
| <i>Phvul.008G193900</i> | Aspartyl protease-like protein                                                   | 1.34<br>±0.2             | 1.11<br>±0.09   | 0.66<br>±0.13    | 1.74<br>±0.81    | 1.16<br>±0.23    | 1.29<br>±0.09    | 2.43<br>±0.67   | 7.57<br>±4.05     |

Table S5 continued

| Gene ID                                              | Gene Annotation                                                            | Transcript levels (FPKM) |                 |                |                 |                 |                |                 |               |
|------------------------------------------------------|----------------------------------------------------------------------------|--------------------------|-----------------|----------------|-----------------|-----------------|----------------|-----------------|---------------|
|                                                      |                                                                            | Mock inoculation         |                 |                |                 | Xap inoculation |                |                 |               |
|                                                      |                                                                            | 0 h PI                   | 8 h PI          | 24 h PI        | 48 h PI         | 0 h PI          | 8 h PI         | 24 h PI         | 48 h PI       |
| <i>Phvul.008G194600</i>                              | NAC domain-containing protein 6-related                                    | 0.28<br>±0.13            | 0.11<br>±0.06   | 0.37<br>±0.22  | 0.25<br>±0.07   | 0.17<br>±0.09   | 0.24<br>±0.08  | 0.36<br>±0.06   | 2.51<br>±0.53 |
| <i>Phvul.008G194828</i>                              | Leucine-rich repeat-containing protein                                     | 0.37<br>±0.06            | 0.16<br>±0.05   | 0.34<br>±0.11  | 0.43<br>±0.21   | 0.32<br>±0.1    | 0.19<br>±0.08  | 0.87<br>±0.33   | 1.74<br>±1.09 |
| <i>Phvul.008G213914</i>                              | Aminocyclopropane-carboxylate oxidase                                      | 0<br>±0                  | 0.04<br>±0.01   | 0.1<br>±0.06   | 0.07<br>±0.02   | 0.05<br>±0.05   | 0.03<br>±0.02  | 0.01<br>±0.01   | 0.86<br>±0.43 |
| <i>Phvul.008G223500</i>                              | Leucoanthocyanidin dioxygenase                                             | 0.11<br>±0.05            | 0.09<br>±0.06   | 0.17<br>±0.02  | 0.28<br>±0.2    | 0.05<br>±0.05   | 0.03<br>±0.02  | 0.38<br>±0.17   | 1.14<br>±0.49 |
| <i>Phvul.008G224400</i>                              | $\alpha/\beta$ -hydrolase related protein                                  | 0.13<br>±0.02            | 0.26<br>±0.03   | 0.28<br>±0.14  | 0.84<br>±0.05   | 0.14<br>±0.08   | 0.34<br>±0.1   | 1.3<br>±0.21    | 3.41<br>±1.2  |
| <i>Phvul.008G232700</i>                              | Extended synaptotagmin-related                                             | 0.21<br>±0.03            | 0.29<br>±0.08   | 0.35<br>±0.08  | 0.44<br>±0.39   | 0.56<br>±0.22   | 0.28<br>±0.15  | 1.19<br>±0.66   | 5.35<br>±2.22 |
| <i>Phvul.008G238200</i>                              | No functional annotation                                                   | 36.82<br>±4.95           | 28.34<br>±10.25 | 17.67<br>±1.47 | 39.65<br>±21.12 | 15.9<br>±9.1    | 24.54<br>±9.77 | 30.36<br>±13.57 | 160<br>±42.82 |
| <i>Phvul.008G242900</i>                              | Late embryogenesis abundant (LEA) hydroxyproline-rich glycoprotein-related | 0.26<br>±0.26            | 0.32<br>±0.12   | 0.33<br>±0.16  | 0.36<br>±0.2    | 0.11<br>±0.07   | 0.26<br>±0.03  | 0.8<br>±0.03    | 5.77<br>±0.28 |
| <i>Phvul.008G248900</i>                              | CBL-interacting serine/threonine-protein kinase 2                          | 1.17<br>±0.51            | 0.46<br>±0.36   | 0.66<br>±0.09  | 0.71<br>±0.16   | 0.84<br>±0.04   | 0.59<br>±0.38  | 0.79<br>±0.17   | 3.34<br>±1.91 |
| <i>Phvul.008G285000</i>                              | Calcium transporting ATPase                                                | 1<br>±0.08               | 0.76<br>±0.06   | 0.89<br>±0.02  | 1<br>±0.28      | 0.61<br>±0.12   | 0.77<br>±0.09  | 1.13<br>±0.07   | 5.1<br>±1.25  |
| <i>Phvul.008G288600</i> ,<br><i>Phvul.008G288700</i> | Exosome complex component RRP42; nudix hydrolase related                   | 2.75<br>±0.85            | 3.07<br>±0.52   | 1.69<br>±0.02  | 1.62<br>±0.36   | 2.34<br>±0.28   | 3.55<br>±0.78  | 2.52<br>±0.33   | 6.78<br>±0.65 |
| <i>Phvul.008G289200</i>                              | No functional annotation                                                   | 0.36<br>±0.1             | 0.63<br>±0.25   | 0.18<br>±0.01  | 0.35<br>±0.15   | 0.25<br>±0.13   | 0.42<br>±0.12  | 0.38<br>±0.17   | 1.59<br>±0.27 |

Table S5 continued

| Gene ID                 | Gene Annotation                                                                                                                                   | Transcript levels (FPKM) |                |               |                |                 |                |                |                 |
|-------------------------|---------------------------------------------------------------------------------------------------------------------------------------------------|--------------------------|----------------|---------------|----------------|-----------------|----------------|----------------|-----------------|
|                         |                                                                                                                                                   | Mock inoculation         |                |               |                | Xap inoculation |                |                |                 |
|                         |                                                                                                                                                   | 0 h PI                   | 8 h PI         | 24 h PI       | 48 h PI        | 0 h PI          | 8 h PI         | 24 h PI        | 48 h PI         |
| <i>Phvul.008G289500</i> | Phenylalanine ammonia-lyase                                                                                                                       | 0.96<br>±0.12            | 0.88<br>±0.24  | 0.88<br>±0.24 | 0.69<br>±0.12  | 0.76<br>±0.09   | 0.94<br>±0.1   | 1.31<br>±0.21  | 4.47<br>±0.25   |
| <i>Phvul.009G014800</i> | F14I17.20 protein                                                                                                                                 | 0.12<br>±0.05            | 0.1<br>±0.04   | 0.18<br>±0.12 | 0.15<br>±0.05  | 0.1<br>±0.05    | 0.12<br>±0.02  | 0.07<br>±0.04  | 1.07<br>±0.16   |
| <i>Phvul.009G032900</i> | No functional annotation                                                                                                                          | 4.95<br>±0.24            | 5.19<br>±2.44  | 3.18<br>±0.93 | 12.1<br>±7     | 4.4<br>±0.28    | 3.51<br>±0.43  | 10.87<br>±3.16 | 74.76<br>±28.24 |
| <i>Phvul.009G042800</i> | No functional annotation                                                                                                                          | 0.32<br>±0.07            | 0.17<br>±0.1   | 0.29<br>±0.15 | 0.17<br>±0.12  | 0.13<br>±0.13   | 0.19<br>±0.1   | 0.3<br>±0.15   | 4.79<br>±2.37   |
| <i>Phvul.009G043100</i> | WRKY DNA-binding domain                                                                                                                           | 11.61<br>±2.04           | 13.04<br>±1.94 | 6.22<br>±0.66 | 6.25<br>±1.33  | 8.6<br>±0.25    | 12.67<br>±2.38 | 8.61<br>±1.51  | 39.4<br>±15.01  |
| <i>Phvul.009G046800</i> | No functional annotation                                                                                                                          | 23.85<br>±2.96           | 17.53<br>±2.05 | 17.8<br>±2.3  | 16.56<br>±3.59 | 15.31<br>±2.47  | 15.04<br>±1.1  | 19.51<br>±2.83 | 205.74<br>±4.75 |
| <i>Phvul.009G046900</i> | Leucine rich repeat (LRR_1)<br>// Protein tyrosine kinase //<br>Leucine rich repeat N-terminal domain (LRRNT_2)<br>// Leucine rich repeat (LRR_8) | 0.24<br>±0.14            | 0.12<br>±0.06  | 0.18<br>±0.04 | 0.27<br>±0.06  | 0.07<br>±0.03   | 0.2<br>±0.1    | 0.34<br>±0.09  | 6.91<br>±0.98   |
| <i>Phvul.009G080000</i> | WRKY DNA-binding domain                                                                                                                           | 0.57<br>±0.18            | 1.07<br>±0.16  | 0.7<br>±0.12  | 0.95<br>±0.23  | 0.41<br>±0.17   | 1.16<br>±0.19  | 1.54<br>±0.44  | 9.84<br>±1.87   |
| <i>Phvul.009G087400</i> | WRKY transcription factor<br>40-related                                                                                                           | 0.69<br>±0.12            | 0.56<br>±0.17  | 0.64<br>±0.02 | 0.62<br>±0.29  | 0.49<br>±0.11   | 0.84<br>±0.09  | 0.78<br>±0.19  | 10.32<br>±2.1   |
| <i>Phvul.009G118800</i> | Expressed protein-related                                                                                                                         | 0.06<br>±0.02            | 0.08<br>±0.02  | 0.16<br>±0.08 | 0.23<br>±0.02  | 0.05<br>±0.01   | 0.12<br>±0.03  | 0.29<br>±0.12  | 2.61<br>±0.54   |
| <i>Phvul.009G138900</i> | WRKY DNA-binding domain                                                                                                                           | 5.18<br>±0.59            | 4.85<br>±1.41  | 3.49<br>±0.69 | 7.3<br>±1.13   | 4.91<br>±0.33   | 4.77<br>±0.71  | 7.51<br>±1.82  | 30.67<br>±5.29  |

Table S5 continued

| Gene ID                 | Gene Annotation                                                                   | Transcript levels (FPKM) |                |                |                 |                 |                |                |                 |
|-------------------------|-----------------------------------------------------------------------------------|--------------------------|----------------|----------------|-----------------|-----------------|----------------|----------------|-----------------|
|                         |                                                                                   | Mock inoculation         |                |                |                 | Xap inoculation |                |                |                 |
|                         |                                                                                   | 0 h PI                   | 8 h PI         | 24 h PI        | 48 h PI         | 0 h PI          | 8 h PI         | 24 h PI        | 48 h PI         |
| <i>Phvul.009G154100</i> | Amino acid transporter                                                            | 0.26<br>±0.19            | 0.74<br>±0.21  | 0.51<br>±0.08  | 0.42<br>±0.05   | 0.14<br>±0.05   | 0.74<br>±0.35  | 0.59<br>±0.21  | 1.76<br>±0.34   |
| <i>Phvul.009G155800</i> | No functional annotation                                                          | 0.58<br>±0.08            | 0.58<br>±0.31  | 0.53<br>±0.1   | 0.58<br>±0.29   | 0.37<br>±0.05   | 0.5<br>±0.01   | 0.72<br>±0.23  | 3.34<br>±1.31   |
| <i>Phvul.009G156300</i> | No apical meristem (NAM) protein                                                  | 0.78<br>±0.47            | 1.1<br>±0.44   | 0.17<br>±0.09  | 0.54<br>±0.1    | 0.29<br>±0.12   | 1.19<br>±0.49  | 0.51<br>±0.16  | 2.22<br>±1.44   |
| <i>Phvul.009G180501</i> | Leucine rich repeat N-terminal domain (LRRNT_2)<br>// Leucine rich repeat (LRR 8) | 5.42<br>±3.87            | 9.57<br>±4.28  | 1.21<br>±0.43  | 0.62<br>±0.29   | 1.7<br>±0.37    | 10.52<br>±5.47 | 3.26<br>±1.66  | 2.74<br>±1.09   |
| <i>Phvul.009G182300</i> | Aminobutyraldehyde dehydrogenase / $\gamma$ -guanidinobutyraldehyde dehydrogenase | 10.84<br>±5.25           | 12.95<br>±3.63 | 7.68<br>±1.02  | 6.19<br>±0.64   | 6.18<br>±0.5    | 14.36<br>±3.83 | 10.37<br>±1.02 | 40.16<br>±16.72 |
| <i>Phvul.009G189300</i> | Molybdate-transporting ATPase                                                     | 0.19<br>±0.03            | 0.22<br>±0.05  | 0.3<br>±0.06   | 0.3<br>±0.12    | 0.1<br>±0.03    | 0.23<br>±0.13  | 0.34<br>±0.04  | 2.06<br>±0.22   |
| <i>Phvul.009G210100</i> | Protein phosphatase 2C                                                            | 1.58<br>±0.28            | 1.04<br>±0.4   | 1.75<br>±0.35  | 1.73<br>±0.33   | 1.56<br>±0.25   | 0.89<br>±0.13  | 2.05<br>±0.26  | 7.97<br>±2.37   |
| <i>Phvul.009G211000</i> | Extensin-like protein repeat                                                      | 18.39<br>±6.69           | 25.36<br>±4.21 | 51.92<br>±9.86 | 45.25<br>±10.73 | 11.8<br>±3.14   | 31.54<br>±9.55 | 51.53<br>±9.19 | 241.75<br>±7.85 |
| <i>Phvul.009G225300</i> | Protein TIFY 10a-related                                                          | 12.66<br>±1.22           | 10.84<br>±1.71 | 15.8<br>±0.98  | 16.3<br>±2.94   | 14.84<br>±2.53  | 11.56<br>±0.76 | 24.67<br>±5.2  | 81.37<br>±35.7  |
| <i>Phvul.009G227001</i> | SER/THR protein kinase ACIK1B                                                     | 0.04<br>±0.02            | 0.06<br>±0.02  | 0.14<br>±0.06  | 0.24<br>±0.03   | 0.06<br>±0.04   | 0.06<br>±0.03  | 0.2<br>±0.06   | 1.15<br>±0.36   |
| <i>Phvul.009G231600</i> | Sterol regulatory element-binding protein                                         | 0.69<br>±0.17            | 0.65<br>±0.12  | 0.47<br>±0.13  | 0.75<br>±0.11   | 0.53<br>±0.15   | 0.68<br>±0.03  | 0.86<br>±0.2   | 4.5<br>±0.37    |

Table S5 continued

| Gene ID                 | Gene Annotation                                | Transcript levels (FPKM) |                |                |                |                        |                 |                |                   |
|-------------------------|------------------------------------------------|--------------------------|----------------|----------------|----------------|------------------------|-----------------|----------------|-------------------|
|                         |                                                | Mock inoculation         |                |                |                | <i>Xap</i> inoculation |                 |                |                   |
|                         |                                                | 0 h PI                   | 8 h PI         | 24 h PI        | 48 h PI        | 0 h PI                 | 8 h PI          | 24 h PI        | 48 h PI           |
| <i>Phvul.009G235700</i> | Helix-loop-helix DNA-binding domain (HLH)      | 1.43<br>±0.06            | 2.14<br>±0.93  | 1.77<br>±0.2   | 1.15<br>±0.2   | 1.47<br>±0.24          | 1.44<br>±0.05   | 2.86<br>±0.91  | 17.83<br>±7.19    |
| <i>Phvul.009G240750</i> | No functional annotation                       | 2.92<br>±1.07            | 2.23<br>±1.6   | 1.89<br>±0.53  | 4.46<br>±1.91  | 1.83<br>±1.19          | 3.33<br>±0.44   | 3.58<br>±1.81  | 30.01<br>±9.09    |
| <i>Phvul.009G241900</i> | VQ motif                                       | 1.19<br>±0.33            | 1.41<br>±0.23  | 1.61<br>±0.32  | 1.66<br>±0.14  | 0.69<br>±0.14          | 1.56<br>±0.47   | 2.84<br>±0.86  | 14.82<br>±1.78    |
| <i>Phvul.009G244200</i> | Isoflavone 2'-hydroxylase                      | 0.28<br>±0.14            | 0.17<br>±0.11  | 0.67<br>±0.13  | 0.86<br>±0.06  | 0.08<br>±0.05          | 0.21<br>±0.09   | 0.83<br>±0.06  | 4.4<br>±0.16      |
| <i>Phvul.009G256400</i> | Glucan endo-1,3-β-d-glucosidase / Laminarinase | 49.3<br>±24.32           | 72.4<br>±26.75 | 43.1<br>±13.16 | 104.6<br>±6.97 | 25.95<br>±6.85         | 70.12<br>±23.73 | 76.07<br>±23.3 | 547.25<br>±144.34 |
| <i>Phvul.009G258600</i> | Anthranilate N-methyltransferase               | 3.94<br>±1.39            | 4.01<br>±0.37  | 4.55<br>±1.18  | 4.52<br>±0.91  | 1.8<br>±0.19           | 4.02<br>±0.91   | 6.81<br>±1.25  | 64.16<br>±2.2     |
| <i>Phvul.009G262300</i> | GDSL esterase/lipase 5-related                 | 0.33<br>±0.05            | 1.03<br>±0.5   | 0.36<br>±0.1   | 0.68<br>±0.17  | 0.82<br>±0.21          | 0.67<br>±0.01   | 0.69<br>±0.06  | 3.23<br>±0.36     |
| <i>Phvul.009G262900</i> | Lipoxygenase 3, chloroplastic-related          | 0.19<br>±0.08            | 0.13<br>±0.02  | 0.24<br>±0.09  | 0.15<br>±0.05  | 0.07<br>±0.02          | 0.27<br>±0.1    | 0.25<br>±0.03  | 2.01<br>±0.09     |
| <i>Phvul.010G000300</i> | Leucocyanidin oxygenase                        | 1.43<br>±0.48            | 2.2<br>±0.79   | 1.89<br>±0.61  | 1.43<br>±0.13  | 1<br>±0.43             | 1.49<br>±0.4    | 3.34<br>±1.5   | 6.66<br>±2.77     |
| <i>Phvul.010G003400</i> | No functional annotation                       | 0.08<br>±0.08            | 0.13<br>±0.08  | 0.11<br>±0.08  | 0.16<br>±0.05  | 0.09<br>±0.05          | 0.03<br>±0.02   | 0.41<br>±0.24  | 2.75<br>±0.45     |
| <i>Phvul.010G005900</i> | Laccase-7-related                              | 0.15<br>±0.05            | 0.02<br>±0.02  | 0.17<br>±0.15  | 0.16<br>±0.08  | 0.02<br>±0.02          | 0.13<br>±0.13   | 0.18<br>±0.14  | 1.25<br>±0.29     |
| <i>Phvul.010G006000</i> | PAR1 protein                                   | 4.12<br>±0.98            | 3.47<br>±1.28  | 2.88<br>±0.4   | 3.33<br>±1.43  | 3.59<br>±0.52          | 3.49<br>±0.57   | 5.89<br>±1.82  | 33.94<br>±11.78   |
| <i>Phvul.010G007400</i> | O-Fucosyltransferase family protein            | 0.13<br>±0.04            | 0.07<br>±0.05  | 0.1<br>±0.06   | 0.1<br>±0.06   | 0.42<br>±0.05          | 0.18<br>±0.06   | 0.21<br>±0.07  | 0.88<br>±0.51     |
| <i>Phvul.010G008800</i> | Glyceollin synthase                            | 0.17<br>±0.09            | 0.12<br>±0.06  | 0.2<br>±0.16   | 0.19<br>±0.11  | 0.03<br>±0.03          | 0.17<br>±0.09   | 0.39<br>±0.2   | 2.14<br>±0.68     |

Table S5 continued

| Gene ID                                                                           | Gene Annotation                                                                  | Transcript levels (FPKM) |                |               |               |                        |                |                |                 |
|-----------------------------------------------------------------------------------|----------------------------------------------------------------------------------|--------------------------|----------------|---------------|---------------|------------------------|----------------|----------------|-----------------|
|                                                                                   |                                                                                  | Mock inoculation         |                |               |               | <i>Xap</i> inoculation |                |                |                 |
|                                                                                   |                                                                                  | 0 h PI                   | 8 h PI         | 24 h PI       | 48 h PI       | 0 h PI                 | 8 h PI         | 24 h PI        | 48 h PI         |
| <i>Phvul.010G016200</i>                                                           | Domain of unknown function                                                       | 0.3<br>±0.09             | 0.21<br>±0.1   | 0.27<br>±0.06 | 0.35<br>±0.13 | 0.35<br>±0.14          | 0.21<br>±0.1   | 0.36<br>±0.06  | 2.19<br>±1.31   |
| <i>Phvul.010G021001</i>                                                           | GDSL esterase/lipase 5-related                                                   | 0.38<br>±0.17            | 0.32<br>±0.08  | 0.69<br>±0.36 | 1.16<br>±0.39 | 0.08<br>±0.05          | 0.27<br>±0.02  | 0.83<br>±0.38  | 33.9<br>±1.49   |
| <i>Phvul.010G021700</i>                                                           | Membrane protein of ER body 2                                                    | 0.23<br>±0.18            | 0.17<br>±0.06  | 0.44<br>±0.16 | 0.33<br>±0.21 | 0.12<br>±0.1           | 0.42<br>±0.12  | 0.51<br>±0.06  | 2.35<br>±0.25   |
| <i>Phvul.010G032000</i>                                                           | Protein kinase domain //D-mannose binding lectin                                 | 0.2<br>±0.04             | 0.16<br>±0.05  | 0.1<br>±0.03  | 0.12<br>±0.03 | 0.45<br>±0.07          | 0.31<br>±0.04  | 0.11<br>±0.01  | 0.58<br>±0.31   |
| <i>Phvul.010G044900</i> ,<br><i>Phvul.010G045200</i>                              | No functional annotation                                                         | 2.49<br>±0.24            | 2.75<br>±1.06  | 2.12<br>±0.53 | 2.54<br>±0.1  | 2.11<br>±0.42          | 2.15<br>±0.05  | 3.14<br>±0.6   | 17.96<br>±4.46  |
| <i>Phvul.010G045000</i>                                                           | No functional annotation                                                         | 0.65<br>±0.15            | 0.97<br>±0.43  | 0.86<br>±0.14 | 1.13<br>±0.1  | 0.48<br>±0.18          | 0.96<br>±0.18  | 1.1<br>±0.1    | 10.69<br>±1.16  |
| <i>Phvul.010G057300</i> ,<br><i>Phvul.010G057500</i> ,<br><i>Phvul.010G057600</i> | Protein kinase domain // S-locus glycoprotein domain // D-mannose binding lectin | 0.51<br>±0.13            | 0.6<br>±0.07   | 0.5<br>±0.03  | 0.35<br>±0.03 | 0.37<br>±0.1           | 0.56<br>±0.06  | 0.48<br>±0.07  | 1.56<br>±0.14   |
| <i>Phvul.010G059000</i>                                                           | Had superfamily, subfamily IIIB acid phosphatase                                 | 3.91<br>±0.69            | 4.22<br>±1.85  | 2.39<br>±0.2  | 3.57<br>±0.7  | 4.05<br>±0.49          | 4.4<br>±0.79   | 5.18<br>±0.59  | 19.85<br>±4.32  |
| <i>Phvul.010G063600</i>                                                           | Dirigent protein 19                                                              | 7.14<br>±3.78            | 12.75<br>±2.53 | 4.9<br>±0.14  | 5.27<br>±0.63 | 5.03<br>±1.29          | 12.92<br>±3.38 | 12.42<br>±1.7  | 28.7<br>±2.59   |
| <i>Phvul.010G063800</i>                                                           | Dirigent protein 19                                                              | 6.7<br>±2.04             | 8.83<br>±1.09  | 9<br>±2.14    | 7.37<br>±2.08 | 3.43<br>±0.16          | 10.32<br>±3.47 | 15.47<br>±3.89 | 72.32<br>±13.91 |
| <i>Phvul.010G070250</i>                                                           | PTHR36766:SF1 - HR3                                                              | 1.28<br>±0.18            | 1.11<br>±0.32  | 0.68<br>±0.24 | 1.27<br>±0.27 | 1.41<br>±0.59          | 1.53<br>±0.19  | 1.63<br>±0.11  | 5.34<br>±2.45   |
| <i>Phvul.010G073500</i>                                                           | Uncharacterized protein                                                          | 0.19<br>±0.1             | 0.14<br>±0.08  | 0.35<br>±0.21 | 0.28<br>±0.14 | 0.13<br>±0.07          | 0.09<br>±0.03  | 0.32<br>±0.06  | 5.43<br>±4.42   |
| <i>Phvul.010G075400</i>                                                           | Glutathione S-transferase U1-related                                             | 2.85<br>±0.55            | 3.9<br>±0.35   | 3.16<br>±0.39 | 3.92<br>±0.61 | 2.98<br>±0.31          | 3.53<br>±0.73  | 4.4<br>±0.77   | 15.93<br>±0.44  |
| <i>Phvul.010G079900</i>                                                           | Pectinesterase/pectinesterase inhibitor 17-related                               | 0.76<br>±0.1             | 0.54<br>±0.13  | 1<br>±0.33    | 0.93<br>±0.12 | 0.36<br>±0.13          | 0.69<br>±0.15  | 1<br>±0.27     | 12.4<br>±0.65   |



Table S5 continued

| Gene ID                                              | Gene Annotation                                          | Transcript levels (FPKM) |                |                |                |                 |                |                |                  |
|------------------------------------------------------|----------------------------------------------------------|--------------------------|----------------|----------------|----------------|-----------------|----------------|----------------|------------------|
|                                                      |                                                          | Mock inoculation         |                |                |                | Xap inoculation |                |                |                  |
|                                                      |                                                          | 0 h PI                   | 8 h PI         | 24 h PI        | 48 h PI        | 0 h PI          | 8 h PI         | 24 h PI        | 48 h PI          |
| <i>Phvul.010G089900</i>                              | BON1-associated protein 1-related                        | 0.49<br>±0.03            | 0.24<br>±0.07  | 0.39<br>±0.14  | 0.51<br>±0.1   | 0.75<br>±0.25   | 0.37<br>±0.19  | 0.67<br>±0.13  | 6.76<br>±1.87    |
| <i>Phvul.010G090000</i>                              | BON1-associated protein 1-related                        | 0.74<br>±0.39            | 1.02<br>±0.62  | 1.03<br>±0.07  | 1.79<br>±1.22  | 0.95<br>±0.38   | 0.78<br>±0.24  | 3.08<br>±0.98  | 19.25<br>±10.07  |
| <i>Phvul.010G093400</i>                              | BON1-associated protein 1-related                        | 0.21<br>±0.12            | 0.17<br>±0.13  | 0.06<br>±0.06  | 0.2<br>±0.03   | 0.33<br>±0.08   | 0.03<br>±0.03  | 0.51<br>±0.26  | 3.53<br>±1.04    |
| <i>Phvul.010G112600</i>                              | CGI-141-related/lipase containing protein                | 0<br>±0                  | 0.01<br>±0.01  | 0.07<br>±0.07  | 0.16<br>±0.06  | 0<br>±0         | 0.01<br>±0.01  | 0.04<br>±0.02  | 0.82<br>±0.42    |
| <i>Phvul.010G117200</i>                              | Homeobox-leucine zipper protein ATHB-12-related          | 1.58<br>±0.79            | 1.09<br>±0.23  | 1.47<br>±0.42  | 2.89<br>±1.64  | 0.57<br>±0.09   | 1.13<br>±0.24  | 2.34<br>±0.42  | 23.02<br>±15.06  |
| <i>Phvul.010G120200</i>                              | Anthranilate N-methyltransferase                         | 0.14<br>±0.09            | 0.22<br>±0.08  | 0.18<br>±0.11  | 0.14<br>±0.09  | 0.02<br>±0.02   | 0.22<br>±0.11  | 0.37<br>±0.2   | 6.33<br>±0.9     |
| <i>Phvul.010G128900</i>                              | Flavonoid 3'-monooxygenase / Flavonoid 3'-hydroxylase    | 39.67<br>±9              | 51.76<br>±5.85 | 21.25<br>±1.94 | 21.35<br>±2.09 | 33.68<br>±3.12  | 54.42<br>±6.47 | 33.76<br>±7.48 | 100.49<br>±31.46 |
| <i>Phvul.010G134000</i>                              | Domain of unknown function                               | 5.37<br>±2.59            | 23.37<br>±5.46 | 10.82<br>±2.23 | 15.82<br>±5.67 | 2.14<br>±0.96   | 9.29<br>±1.68  | 23.52<br>±8.48 | 107<br>±20.35    |
| <i>Phvul.010G137300</i>                              | Calmodulin-binding protein                               | 0.08<br>±0.03            | 0.09<br>±0.05  | 0.1<br>±0.01   | 0.14<br>±0.06  | 0.2<br>±0.08    | 0.11<br>±0.05  | 0.14<br>±0.04  | 0.79<br>±0.4     |
| <i>Phvul.010G137800</i> ,<br><i>Phvul.010G137900</i> | β-Fructofuranosidase, insoluble isoenzyme CWINV1-related | 1.42<br>±0.04            | 1.48<br>±0.44  | 1.8<br>±0.36   | 1.77<br>±0.28  | 1.25<br>±0.16   | 1.45<br>±0.23  | 2.94<br>±0.31  | 43.53<br>±3.94   |
| <i>Phvul.010G155100</i>                              | No functional annotation                                 | 2.05<br>±0.48            | 1.91<br>±0.55  | 1.7<br>±0.21   | 2.35<br>±1.02  | 2.32<br>±0.92   | 2.15<br>±0.51  | 3.83<br>±1.22  | 12.2<br>±4.05    |
| <i>Phvul.011G013600</i>                              | α-Farnesene synthase                                     | 0.79<br>±0.39            | 0.73<br>±0.73  | 1.28<br>±0.22  | 0.59<br>±0.13  | 1.18<br>±0.09   | 0.24<br>±0.24  | 1.11<br>±0.12  | 2.38<br>±1.73    |
| <i>Phvul.011G025100</i>                              | Amino acid transporter                                   | 9.22<br>±1.37            | 8.98<br>±4.61  | 8.45<br>±0.62  | 9.36<br>±3.17  | 13.18<br>±2.28  | 8.37<br>±2.73  | 15.19<br>±3.24 | 41.28<br>±9.45   |
| <i>Phvul.011G034800</i>                              | Senescence-associated protein                            | 1.22<br>±0.21            | 0.72<br>±0.06  | 0.88<br>±0.05  | 0.99<br>±0.33  | 0.6<br>±0.06    | 0.89<br>±0.28  | 3.38<br>±1.43  | 4.47<br>±2.71    |

Table S5 continued

| Gene ID                 | Gene Annotation                                                                    | Transcript levels (FPKM) |                       |                      |                      |                      |                       |                       |                       |
|-------------------------|------------------------------------------------------------------------------------|--------------------------|-----------------------|----------------------|----------------------|----------------------|-----------------------|-----------------------|-----------------------|
|                         |                                                                                    | Mock inoculation         |                       |                      |                      | Xap inoculation      |                       |                       |                       |
|                         |                                                                                    | 0 h PI                   | 8 h PI                | 24 h PI              | 48 h PI              | 0 h PI               | 8 h PI                | 24 h PI               | 48 h PI               |
| <i>Phvul.011G035600</i> | Adenine nucleotide $\alpha$ -hydrolases-domain containing protein kinase-related   | 0.16<br>$\pm 0.14$       | 0.16<br>$\pm 0.05$    | 0.14<br>$\pm 0.06$   | 0.16<br>$\pm 0.05$   | 0.03<br>$\pm 0.03$   | 0.22<br>$\pm 0.16$    | 0.21<br>$\pm 0.09$    | 1.24<br>$\pm 0.21$    |
| <i>Phvul.011G041400</i> | S-locus glycoprotein domain // D-mannose binding lectin // protein tyrosine kinase | 0.26<br>$\pm 0.03$       | 0.54<br>$\pm 0.16$    | 0.15<br>$\pm 0.02$   | 0.25<br>$\pm 0.09$   | 0.28<br>$\pm 0.03$   | 0.46<br>$\pm 0.08$    | 0.3<br>$\pm 0.06$     | 1.61<br>$\pm 0.47$    |
| <i>Phvul.011G043100</i> | BCS1 AAA-type ATPase                                                               | 5.84<br>$\pm 0.29$       | 6.62<br>$\pm 1.64$    | 3.59<br>$\pm 0.23$   | 4.8<br>$\pm 0.83$    | 5.81<br>$\pm 0.18$   | 5.74<br>$\pm 0.38$    | 6.73<br>$\pm 1.49$    | 23.38<br>$\pm 7.74$   |
| <i>Phvul.011G044500</i> | NAD dependent epimerase/dehydratase                                                | 0.28<br>$\pm 0.02$       | 0.31<br>$\pm 0.12$    | 0.79<br>$\pm 0.38$   | 0.26<br>$\pm 0.2$    | 0.29<br>$\pm 0.02$   | 0.46<br>$\pm 0.09$    | 0.78<br>$\pm 0.51$    | 4.68<br>$\pm 0.76$    |
| <i>Phvul.011G051600</i> | No functional annotation                                                           | 0.18<br>$\pm 0.09$       | 0.25<br>$\pm 0.09$    | 0.25<br>$\pm 0.12$   | 0.64<br>$\pm 0.64$   | 0<br>$\pm 0$         | 0.15<br>$\pm 0.08$    | 0.45<br>$\pm 0.31$    | 5.6<br>$\pm 1.43$     |
| <i>Phvul.011G060300</i> | Glucosyltransferase-like protein-related                                           | 0.06<br>$\pm 0.06$       | 0.06<br>$\pm 0.02$    | 0.14<br>$\pm 0.08$   | 0.17<br>$\pm 0.05$   | 0.03<br>$\pm 0.01$   | 0.05<br>$\pm 0.03$    | 0.21<br>$\pm 0.08$    | 1.67<br>$\pm 0.4$     |
| <i>Phvul.011G062900</i> | Putative hydrolase of the HAD superfamily                                          | 0.45<br>$\pm 0.18$       | 0.53<br>$\pm 0.25$    | 0.51<br>$\pm 0.1$    | 0.18<br>$\pm 0.03$   | 0.35<br>$\pm 0.03$   | 0.36<br>$\pm 0.03$    | 0.5<br>$\pm 0.17$     | 1.46<br>$\pm 0.54$    |
| <i>Phvul.011G072200</i> | Lob domain-containing protein 1-related                                            | 0.85<br>$\pm 0.36$       | 1.31<br>$\pm 0.28$    | 1.33<br>$\pm 0.17$   | 1.51<br>$\pm 0.4$    | 0.45<br>$\pm 0.08$   | 1.74<br>$\pm 0.79$    | 1.62<br>$\pm 0.27$    | 8.54<br>$\pm 3.1$     |
| <i>Phvul.011G077900</i> | Glucan endo-1,3- $\beta$ -D-glucosidase / Laminarinase                             | 113.58<br>$\pm 47.26$    | 113.85<br>$\pm 21.75$ | 89.63<br>$\pm 16.63$ | 80.81<br>$\pm 21.81$ | 78.16<br>$\pm 23.53$ | 134.92<br>$\pm 24.91$ | 115.59<br>$\pm 21.84$ | 671.13<br>$\pm 21.22$ |
| <i>Phvul.011G089500</i> | $\gamma$ -Aminobutyrate transporter 1                                              | 0.32<br>$\pm 0.12$       | 0.33<br>$\pm 0.15$    | 0.38<br>$\pm 0.15$   | 0.27<br>$\pm 0.1$    | 0.15<br>$\pm 0.02$   | 0.37<br>$\pm 0.08$    | 0.41<br>$\pm 0.13$    | 3.6<br>$\pm 0.44$     |
| <i>Phvul.011G096300</i> | F-box-like                                                                         | 0.4<br>$\pm 0.17$        | 0.78<br>$\pm 0.15$    | 0.4<br>$\pm 0.12$    | 0.49<br>$\pm 0.18$   | 0.33<br>$\pm 0.06$   | 0.67<br>$\pm 0.17$    | 0.87<br>$\pm 0.38$    | 3<br>$\pm 0.43$       |
| <i>Phvul.011G108600</i> | EF-hand calcium-binding domain containing protein                                  | 2.2<br>$\pm 0.22$        | 2.25<br>$\pm 0.94$    | 1.67<br>$\pm 0.52$   | 3.33<br>$\pm 0.51$   | 3.27<br>$\pm 0.86$   | 4.21<br>$\pm 1.83$    | 3.66<br>$\pm 1.05$    | 18.08<br>$\pm 2.4$    |

Table S5 continued

| Gene ID                                        | Gene Annotation                                       | Transcript levels (FPKM) |                 |                |                |                        |                |                |                 |
|------------------------------------------------|-------------------------------------------------------|--------------------------|-----------------|----------------|----------------|------------------------|----------------|----------------|-----------------|
|                                                |                                                       | Mock inoculation         |                 |                |                | <i>Xap</i> inoculation |                |                |                 |
|                                                |                                                       | 0 h PI                   | 8 h PI          | 24 h PI        | 48 h PI        | 0 h PI                 | 8 h PI         | 24 h PI        | 48 h PI         |
| <i>Phvul.011G109600</i>                        | MYB-like DNA-binding protein                          | 0.18<br>±0.13            | 0.22<br>±0.12   | 0.13<br>±0.06  | 0.2<br>±0.2    | 0.02<br>±0.02          | 0.09<br>±0.05  | 0.12<br>±0.03  | 3.84<br>±1.86   |
| <i>Phvul.011G147800</i>                        | NAC domain-containing protein 19-related              | 0.05<br>±0.03            | 0.08<br>±0.06   | 0.02<br>±0.01  | 0.58<br>±0.28  | 0.03<br>±0.03          | 0.11<br>±0.04  | 0.33<br>±0.14  | 6.47<br>±3.31   |
| <i>Phvul.011G148500</i>                        | No functional annotation                              | 0.09<br>±0.09            | 0.03<br>±0.03   | 0.03<br>±0.03  | 0.61<br>±0.54  | 0<br>±0                | 0.13<br>±0.13  | 0.59<br>±0.28  | 3.13<br>±1.81   |
| <i>Phvul.011G150400</i>                        | Cysteine-rich receptor-like protein kinase 27-related | 0.34<br>±0.09            | 0.59<br>±0.09   | 0.28<br>±0.05  | 0.17<br>±0.05  | 0.37<br>±0.03          | 0.5<br>±0.02   | 0.38<br>±0.12  | 1.55<br>±0.4    |
| <i>Phvul.011G166500</i>                        | Trypsin and protease inhibitor                        | 0.95<br>±0.23            | 0.64<br>±0.13   | 1.99<br>±0.68  | 1.18<br>±0.07  | 1.09<br>±0.44          | 0.83<br>±0.21  | 1.53<br>±0.55  | 41.53<br>±2.24  |
| <i>Phvul.011G167300</i>                        | Chitinase                                             | 13.43<br>±4.41           | 15.61<br>±2.15  | 13.54<br>±2.48 | 12.81<br>±2.57 | 10.54<br>±1.62         | 16.53<br>±1.38 | 16.43<br>±2.67 | 199.32<br>±2.61 |
| <i>Phvul.011G169900</i>                        | Trypsin and protease inhibitor                        | 0.38<br>±0.19            | 0.3<br>±0.11    | 0.5<br>±0.04   | 0.53<br>±0.04  | 0.43<br>±0.08          | 0.15<br>±0.06  | 0.28<br>±0.12  | 14.3<br>±0.89   |
| <i>Phvul.011G176950</i>                        | Glucan endo-1,3-β-D-glucosidase / Laminarinase        | 41.53<br>±3.63           | 57.12<br>±29.51 | 23.69<br>±0.25 | 24.91<br>±6.13 | 45.91<br>±14.23        | 55.25<br>±7.93 | 37.77<br>±9.5  | 295.71<br>±30.8 |
| <i>Phvul.011G179600</i>                        | Caspase regulator, RING finger domain-containing      | 0.4<br>±0.08             | 0.62<br>±0.1    | 0.42<br>±0.06  | 0.37<br>±0.1   | 0.61<br>±0.03          | 0.45<br>±0     | 0.51<br>±0.12  | 2.92<br>±0.28   |
| <i>Phvul.011G211600</i>                        | No functional annotation                              | 0<br>±0                  | 0<br>±0         | 0<br>±0        | 0<br>±0        | 0.12<br>±0.06          | 0<br>±0        | 0<br>±0        | 0.87<br>±0.79   |
| <i>Phvul.011G214400</i>                        | Protein kinase domain /D-mannose binding lectin       | 0.06<br>±0.03            | 0.05<br>±0.02   | 0.06<br>±0.03  | 0.11<br>±0.06  | 0.06<br>±0.02          | 0.04<br>±0.02  | 0.09<br>±0.02  | 1.17<br>±0.15   |
| <i>Phvul.L000770</i> ,<br><i>Phvul.L001078</i> | No functional annotation                              | 1.06<br>±0.45            | 1.39<br>±0.65   | 1.53<br>±0.54  | 3.2<br>±0.16   | 1.29<br>±0.14          | 2.01<br>±0.73  | 3.62<br>±0.87  | 28.35<br>±15.29 |
| <i>Phvul.L003043</i>                           | C2H2-type zinc finger family protein-related          | 0.6<br>±0.29             | 0.7<br>±0.2     | 0.3<br>±0.11   | 0.68<br>±0.14  | 1.18<br>±0.34          | 0.79<br>±0.43  | 0.74<br>±0.26  | 7.24<br>±3.97   |
| XLOC_016664                                    | No functional annotation                              | 0.25<br>±0.18            | 0.24<br>±0.09   | 0.22<br>±0.03  | 0.41<br>±0.08  | 0.02<br>±0.02          | 0.28<br>±0.14  | 0.56<br>±0.02  | 2.89<br>±0.2    |

**Table S5 continued**

| Gene ID     | Gene Annotation          | Transcript levels (FPKM) |               |               |               |                        |               |               |               |
|-------------|--------------------------|--------------------------|---------------|---------------|---------------|------------------------|---------------|---------------|---------------|
|             |                          | Mock inoculation         |               |               |               | <i>Xap</i> inoculation |               |               |               |
|             |                          | 0 h PI                   | 8 h PI        | 24 h PI       | 48 h PI       | 0 h PI                 | 8 h PI        | 24 h PI       | 48 h PI       |
| XLOC_023524 | No functional annotation | 0<br>±0                  | 1.29<br>±1.29 | 2.03<br>±1.3  | 2<br>±0.28    | 0.71<br>±0.71          | 1.03<br>±0.52 | 1.83<br>±1.17 | 36.2<br>±3.05 |
| XLOC_027462 | No functional annotation | 0<br>±0                  | 0<br>±0       | 0.32<br>±0.32 | 0.57<br>±0.14 | 0<br>±0                | 0<br>±0       | 0.24<br>±0.08 | 5.03<br>±0.74 |
| XLOC_027490 | No functional annotation | 0.32<br>±0.1             | 0.52<br>±0.09 | 0.14<br>±0.1  | 0.4<br>±0.05  | 0.13<br>±0.01          | 0.32<br>±0.17 | 0.47<br>±0.08 | 2.75<br>±0.54 |

**Table S6. Transcript abundance for genes upregulated in the CBB-susceptible RIL at 0 h post-inoculation (PI) with *Xanthomonas axonopodis* (Xap).** Transcript levels for individual genes corresponding to each RIL/ inoculation treatment/ sampling time PI are represented as FPKM  $\pm$  SE of three experimental replicates.

| Gene ID                 | Gene Annotation                                               | Transcript levels (FPKM) |                    |                    |                      |                      |                     |                     |                      |
|-------------------------|---------------------------------------------------------------|--------------------------|--------------------|--------------------|----------------------|----------------------|---------------------|---------------------|----------------------|
|                         |                                                               | Mock inoculation         |                    |                    |                      | Xap inoculation      |                     |                     |                      |
|                         |                                                               | 0 h PI                   | 8 h PI             | 24 h PI            | 48 h PI              | 0 h PI               | 8 h PI              | 24 h PI             | 48 h PI              |
| <i>Phvul.002G076200</i> | F3I6.5 protein                                                | 4.98<br>$\pm 1.36$       | 2.76<br>$\pm 0.2$  | 5.19<br>$\pm 1.14$ | 8.5<br>$\pm 3.05$    | 20.63<br>$\pm 3.59$  | 2.44<br>$\pm 0.25$  | 6.21<br>$\pm 1.04$  | 9<br>$\pm 3.26$      |
| <i>Phvul.002G165800</i> | BCS1 AAA-type ATPase                                          | 0.47<br>$\pm 0.16$       | 0.1<br>$\pm 0.06$  | 0.2<br>$\pm 0.04$  | 0.29<br>$\pm 0.14$   | 1.88<br>$\pm 0.17$   | 0.04<br>$\pm 0.04$  | 0.25<br>$\pm 0.02$  | 0.27<br>$\pm 0.16$   |
| <i>Phvul.003G075300</i> | No functional annotation                                      | 11<br>$\pm 2.47$         | 8.96<br>$\pm 0.18$ | 7.68<br>$\pm 1.25$ | 4.46<br>$\pm 0.76$   | 48.57<br>$\pm 4.26$  | 9.46<br>$\pm 1.71$  | 6.03<br>$\pm 0.65$  | 6.39<br>$\pm 2.14$   |
| <i>Phvul.003G079900</i> | Glucan endo-1,3- $\beta$ -glucosidase 1                       | 4.37<br>$\pm 1.08$       | 2.21<br>$\pm 0.09$ | 2.25<br>$\pm 0.23$ | 1.04<br>$\pm 0.09$   | 20.32<br>$\pm 8.19$  | 2.26<br>$\pm 0.44$  | 1.42<br>$\pm 0.34$  | 2.11<br>$\pm 0.84$   |
| <i>Phvul.003G110200</i> | COBRA-like protein 7-related                                  | 3.71<br>$\pm 0.57$       | 2.83<br>$\pm 0.32$ | 1.66<br>$\pm 0.25$ | 5.29<br>$\pm 3.48$   | 16.3<br>$\pm 2.63$   | 2.52<br>$\pm 0.07$  | 1.87<br>$\pm 0.17$  | 7.14<br>$\pm 4.73$   |
| <i>Phvul.003G138226</i> | Very-long-chain 3-oxoacyl-CoA synthase                        | 3.19<br>$\pm 0.69$       | 2.07<br>$\pm 0.39$ | 3.49<br>$\pm 0.69$ | 3.36<br>$\pm 0.51$   | 17.13<br>$\pm 6.83$  | 1.9<br>$\pm 0.28$   | 2.82<br>$\pm 0.77$  | 3.31<br>$\pm 0.52$   |
| <i>Phvul.003G140426</i> | No functional annotation                                      | 5.51<br>$\pm 1.18$       | 4.37<br>$\pm 0.35$ | 5.65<br>$\pm 0.4$  | 5.11<br>$\pm 0.62$   | 23.1<br>$\pm 4.88$   | 3.91<br>$\pm 0.78$  | 5.08<br>$\pm 0.33$  | 4.87<br>$\pm 1.09$   |
| <i>Phvul.003G147300</i> | Xyloglucan endotransglucosylase/ Hydrolase protein 21-related | 0.15<br>$\pm 0.08$       | 0.01<br>$\pm 0.01$ | 0.1<br>$\pm 0.03$  | 0.21<br>$\pm 0.13$   | 1.14<br>$\pm 0.67$   | 0<br>$\pm 0$        | 0.03<br>$\pm 0.03$  | 0.04<br>$\pm 0.03$   |
| <i>Phvul.003G152300</i> | NAD dependent epimerase/dehydratase                           | 36.19<br>$\pm 4.07$      | 27.86<br>$\pm 0.9$ | 31.2<br>$\pm 3.91$ | 39.41<br>$\pm 18.99$ | 146.5<br>$\pm 30.89$ | 27.39<br>$\pm 1.24$ | 29.13<br>$\pm 5.24$ | 57.35<br>$\pm 23.34$ |

Table S6 continued

| Gene ID                 | Gene Annotation                                       | Transcript levels (FPKM) |                |                |                 |                  |                |               |                 |
|-------------------------|-------------------------------------------------------|--------------------------|----------------|----------------|-----------------|------------------|----------------|---------------|-----------------|
|                         |                                                       | Mock inoculation         |                |                |                 | Xap inoculation  |                |               |                 |
|                         |                                                       | 0 h PI                   | 8 h PI         | 24 h PI        | 48 h PI         | 0 h PI           | 8 h PI         | 24 h PI       | 48 h PI         |
| <i>Phvul.004G019600</i> | Xyloglucan glycosyltransferase 4                      | 1.97<br>±0.31            | 1.33<br>±0.12  | 1.3<br>±0.09   | 1.12<br>±0.21   | 8.95<br>±2.21    | 1.41<br>±0.1   | 1.5<br>±0.17  | 1.88<br>±0.58   |
| <i>Phvul.004G132000</i> | Peroxidase 47                                         | 8.04<br>±3.45            | 3.82<br>±0.96  | 4.13<br>±0.81  | 1.45<br>±0.2    | 54.64<br>±19.76  | 2.98<br>±1.06  | 5.9<br>±0.94  | 5.52<br>±1.89   |
| <i>Phvul.004G173101</i> | Protein of unknown function                           | 4.65<br>±0.16            | 5.01<br>±0.25  | 2.71<br>±0.65  | 6.11<br>±1.85   | 24.27<br>±7.84   | 3.73<br>±0.63  | 2.3<br>±0.17  | 5.12<br>±2.11   |
| <i>Phvul.005G068500</i> | Basic helix-loop-helix domain-containing protein      | 3.16<br>±1.09            | 3.18<br>±0.69  | 0.45<br>±0.24  | 0.18<br>±0.02   | 20.23<br>±11.99  | 3.54<br>±1.13  | 0.63<br>±0.18 | 0.51<br>±0.23   |
| <i>Phvul.005G111300</i> | Xyloglucan endotransglucosylase / Hydrolase protein 9 | 22.23<br>±6.44           | 17.23<br>±0.46 | 11.41<br>±2.32 | 7.29<br>±1.71   | 139.23<br>±91.53 | 17.06<br>±1.01 | 10.8<br>±0.95 | 10.14<br>±2.29  |
| <i>Phvul.006G023000</i> | Zinc finger FYVE domain containing protein            | 0.39<br>±0.2             | 0.21<br>±0.09  | 0.2<br>±0.05   | 0.05<br>±0.05   | 1.63<br>±0.16    | 0.18<br>±0.04  | 0.09<br>±0.07 | 0.07<br>±0.02   |
| <i>Phvul.006G167400</i> | BCL2-associated athanogene                            | 4.63<br>±0.58            | 5.25<br>±0.5   | 3.41<br>±0.72  | 1.47<br>±0.19   | 19.39<br>±6.03   | 4.5<br>±0.48   | 3.01<br>±1.1  | 3.81<br>±1.06   |
| <i>Phvul.006G204100</i> | No functional annotation                              | 7.81<br>±1.87            | 4.93<br>±0.98  | 4.05<br>±0.24  | 30.76<br>±20.77 | 35.96<br>±8.97   | 3.86<br>±0.95  | 3.54<br>±0.69 | 20.34<br>±12.31 |
| <i>Phvul.007G021700</i> | Cupin domain (Cupin_2)                                | 0.69<br>±0.39            | 0.53<br>±0.01  | 0.56<br>±0.08  | 0.49<br>±0.06   | 3.28<br>±0.44    | 1.37<br>±0.03  | 0.53<br>±0.16 | 0.64<br>±0.17   |
| <i>Phvul.007G198400</i> | F-Box protein PP2-B13-related                         | 2.42<br>±0.76            | 0.57<br>±0.29  | 2.85<br>±0.48  | 3.51<br>±0.21   | 10.94<br>±1.91   | 0.92<br>±0.11  | 2.98<br>±0.18 | 3.42<br>±0.49   |
| <i>Phvul.008G049600</i> | Cyclin-U4-1                                           | 1.46<br>±0.79            | 0.5<br>±0.28   | 1.94<br>±0.47  | 0.52<br>±0.23   | 8.44<br>±3.88    | 0.47<br>±0.03  | 1.16<br>±0.28 | 1.38<br>±0.53   |
| <i>Phvul.008G081000</i> | Receptor-like protein kinase feronia                  | 5.86<br>±0.52            | 3.11<br>±1.56  | 4.14<br>±0.45  | 3.73<br>±0.44   | 25.19<br>±7.19   | 4.96<br>±0.4   | 3.89<br>±0.29 | 5.67<br>±1.64   |

Table S6 continued

| Gene ID                 | Gene Annotation                                      | Transcript levels (FPKM) |                  |                 |                 |                    |                  |                  |                  |
|-------------------------|------------------------------------------------------|--------------------------|------------------|-----------------|-----------------|--------------------|------------------|------------------|------------------|
|                         |                                                      | Mock inoculation         |                  |                 |                 | Xap inoculation    |                  |                  |                  |
|                         |                                                      | 0 h PI                   | 8 h PI           | 24 h PI         | 48 h PI         | 0 h PI             | 8 h PI           | 24 h PI          | 48 h PI          |
| <i>Phvul.008G174100</i> | Predicted RNA-binding protein SEB4 (RRM superfamily) | 0.23<br>±0.05            | 0.02<br>±0.02    | 0.09<br>±0.05   | 0.01<br>±0.01   | 1.01<br>±0.85      | 0.04<br>±0.02    | 0<br>±0          | 0<br>±0          |
| <i>Phvul.008G237500</i> | Glutamine synthetase                                 | 0.67<br>±0.05            | 0.68<br>±0.4     | 0.22<br>±0.03   | 0.14<br>±0.05   | 4.21<br>±2.71      | 1.02<br>±0.23    | 0.14<br>±0.05    | 0.13<br>±0.08    |
| <i>Phvul.009G074400</i> | Xyloglucan glycosyltransferase 12-related            | 4.36<br>±0.39            | 2.48<br>±1.24    | 2.21<br>±0.36   | 2.03<br>±0.44   | 18.13<br>±6.41     | 4.07<br>±0.45    | 1.81<br>±0.35    | 3.17<br>±1.52    |
| <i>Phvul.009G075801</i> | No functional annotation                             | 683.63<br>±56.18         | 443.46<br>±225.4 | 356.53<br>±73.1 | 206.74<br>±7.14 | 2865.96<br>±646.99 | 590.81<br>±71.25 | 241.43<br>±24.29 | 337.75<br>±80.59 |
| <i>Phvul.009G113400</i> | F2J10.8 protein-related                              | 12.99<br>±2.38           | 6.95<br>±3.48    | 9.59<br>±1.77   | 6.11<br>±1.24   | 62.11<br>±7.73     | 11.94<br>±0.96   | 9.04<br>±0.85    | 9.19<br>±2.68    |
| <i>Phvul.009G234900</i> | No functional annotation                             | 0<br>±0                  | 0.55<br>±0.55    | 3.09<br>±0.47   | 1.97<br>±1.13   | 10.23<br>±1.86     | 0.66<br>±0.66    | 1.61<br>±1.61    | 2.44<br>±1.29    |
| <i>Phvul.010G061500</i> | Wound-induced protein WI12                           | 1.03<br>±0.53            | 0.25<br>±0.13    | 2.33<br>±1.25   | 0.79<br>±0.12   | 6.65<br>±2.15      | 0.17<br>±0.11    | 1.17<br>±0.4     | 1.24<br>±0.51    |
| <i>Phvul.010G152200</i> | Gibberellin 3-β-dioxygenase 1-related                | 0.38<br>±0.05            | 0.39<br>±0.21    | 0.35<br>±0.08   | 0.18<br>±0.13   | 2.52<br>±1.43      | 0.39<br>±0.07    | 0.39<br>±0.13    | 0.44<br>±0.13    |
| <i>Phvul.011G054100</i> | Calmodulin-like protein 6-related                    | 7.02<br>±1.93            | 2.55<br>±1.39    | 7.15<br>±0.92   | 14.32<br>±4.38  | 37.3<br>±4.83      | 4.14<br>±0.66    | 7.14<br>±0.37    | 14.26<br>±4.21   |
| <i>Phvul.011G107000</i> | Xyloglucan endotransglucosylase/ Hydrolase protein 9 | 5.15<br>±2.12            | 5.36<br>±2.8     | 2.17<br>±0.29   | 1.97<br>±0.39   | 34.64<br>±27.35    | 7.76<br>±1.44    | 2.29<br>±0.66    | 2.69<br>±0.68    |
| XLOC_027363             | No functional annotation                             | 1.67<br>±0.76            | 0.76<br>±0.38    | 1.44<br>±0.16   | 1.06<br>±0.55   | 7.44<br>±0.65      | 1.66<br>±0.31    | 1.28<br>±0.32    | 1.1<br>±0.28     |

**Table S7. Transcript abundance for genes upregulated in the CBB-susceptible RIL at 8 h post-inoculation (PI) with *Xanthomonas axonopodis* (Xap).** Transcript levels for individual genes corresponding to each RIL/ inoculation treatment/ sampling time PI are represented as FPKM  $\pm$  SE of three experimental replicates.

| Gene ID                 | Gene Annotation                     | Transcript levels (FPKM) |                    |                    |                    |                    |                    |                    |                    |
|-------------------------|-------------------------------------|--------------------------|--------------------|--------------------|--------------------|--------------------|--------------------|--------------------|--------------------|
|                         |                                     | Mock inoculation         |                    |                    |                    | Xap inoculation    |                    |                    |                    |
|                         |                                     | 0 h PI                   | 8 h PI             | 24 h PI            | 48 h PI            | 0 h PI             | 8 h PI             | 24 h PI            | 48 h PI            |
| <i>Phvul.011G127300</i> | Cysteine protease family C1-related | 0.48<br>$\pm 0.46$       | 0.32<br>$\pm 0.18$ | 0.14<br>$\pm 0.11$ | 0.05<br>$\pm 0.01$ | 0.06<br>$\pm 0.03$ | 1.42<br>$\pm 0.73$ | 0.22<br>$\pm 0.04$ | 0.11<br>$\pm 0.03$ |
| XLOC_001894             | No functional annotation            | 0.09<br>$\pm 0.05$       | 0<br>$\pm 0$       | 0<br>$\pm 0$       | 0.03<br>$\pm 0.03$ | 0.08<br>$\pm 0.08$ | 1.07<br>$\pm 0.57$ | 0.18<br>$\pm 0.1$  | 0.08<br>$\pm 0.08$ |



**Table S8. Transcript abundance for genes upregulated in the CBB-susceptible RIL at 24 h post-inoculation (PI) with *Xanthomonas axonopodis* (Xap).** Transcript levels for individual genes corresponding to each RIL/ inoculation treatment/ sampling time PI are represented as FPKM  $\pm$  SE of three experimental replicates.

| Gene ID                 | Gene Annotation                        | Transcript levels (FPKM) |                    |                    |                     |                    |                    |                     |                     |
|-------------------------|----------------------------------------|--------------------------|--------------------|--------------------|---------------------|--------------------|--------------------|---------------------|---------------------|
|                         |                                        | Mock inoculation         |                    |                    |                     | Xap inoculation    |                    |                     |                     |
|                         |                                        | 0 h PI                   | 8 h PI             | 24 h PI            | 48 h PI             | 0 h PI             | 8 h PI             | 24 h PI             | 48 h PI             |
| <i>Phvul.003G012600</i> | Auxin response factor 30-related       | 0.18<br>$\pm 0.02$       | 0.18<br>$\pm 0.03$ | 0<br>$\pm 0$       | 0.08<br>$\pm 0.04$  | 0.06<br>$\pm 0.06$ | 0.82<br>$\pm 0.49$ | 0.56<br>$\pm 0.15$  | 0.31<br>$\pm 0.23$  |
| <i>Phvul.003G143400</i> | Peroxidase 16-related                  | 0<br>$\pm 0$             | 0<br>$\pm 0$       | 0<br>$\pm 0$       | 0.13<br>$\pm 0.07$  | 0<br>$\pm 0$       | 0<br>$\pm 0$       | 0.6<br>$\pm 0.55$   | 0.26<br>$\pm 0.25$  |
| <i>Phvul.004G059200</i> | Pectate lyase 11-related               | 1.27<br>$\pm 0.46$       | 2 $\pm 0.11$       | 3.17<br>$\pm 0.47$ | 3.75<br>$\pm 0.87$  | 0.73<br>$\pm 0.31$ | 1.67<br>$\pm 0.13$ | 13.34<br>$\pm 7.33$ | 11.84<br>$\pm 7.47$ |
| <i>Phvul.007G021300</i> | Protein trichome birefringence-like 36 | 0.33<br>$\pm 0.05$       | 0.49<br>$\pm 0.1$  | 0.19<br>$\pm 0.05$ | 0.22<br>$\pm 0.06$  | 0.24<br>$\pm 0.03$ | 0.4<br>$\pm 0.05$  | 0.97<br>$\pm 0.5$   | 0.77<br>$\pm 0.42$  |
| <i>Phvul.009G108300</i> | Adenosylhomocysteine nucleosidase      | 1.61<br>$\pm 0.97$       | 1.82<br>$\pm 1.02$ | 2.45<br>$\pm 0.49$ | 13.17<br>$\pm 2.83$ | 0.53<br>$\pm 0.29$ | 1.82<br>$\pm 0.4$  | 10.65<br>$\pm 6.96$ | 6.96<br>$\pm 2.74$  |

**Table S9. Transcript abundance for genes upregulated in the CBB-susceptible RIL at 48 h post-inoculation (PI) with *Xanthomonas axonopodis* (Xap).** Transcript levels for individual genes corresponding to each RIL/ inoculation treatment/ sampling time PI are represented as FPKM  $\pm$  SE of three experimental replicates.

| Gene ID                 | Gene Annotation                                                            | Transcript levels (FPKM) |                      |                     |                    |                     |                      |                      |                      |
|-------------------------|----------------------------------------------------------------------------|--------------------------|----------------------|---------------------|--------------------|---------------------|----------------------|----------------------|----------------------|
|                         |                                                                            | Mock inoculation         |                      |                     |                    | Xap inoculation     |                      |                      |                      |
|                         |                                                                            | 0 h PI                   | 8 h PI               | 24 h PI             | 48 h PI            | 0 h PI              | 8 h PI               | 24 h PI              | 48 h PI              |
| <i>Phvul.001G001500</i> | Multi-copper oxidase type I family protein-related                         | 6.48<br>$\pm 0.72$       | 5.54<br>$\pm 0.94$   | 1.46<br>$\pm 0.79$  | 0.42<br>$\pm 0.09$ | 8.77<br>$\pm 3.13$  | 5.11<br>$\pm 1.6$    | 2.13<br>$\pm 0.39$   | 1.71<br>$\pm 0.16$   |
| <i>Phvul.001G146800</i> | Receptor-like cytoplasmic kinase VIA5                                      | 6.06<br>$\pm 0.7$        | 5.74<br>$\pm 0.27$   | 1.17<br>$\pm 0.24$  | 0.2<br>$\pm 0.06$  | 10.6<br>$\pm 0.43$  | 4.62<br>$\pm 0.68$   | 1<br>$\pm 0.52$      | 1.23<br>$\pm 0.35$   |
| <i>Phvul.002G000900</i> | Taxadien-5- $\alpha$ -ol O-acetyltransferase                               | 5.1<br>$\pm 1.86$        | 1.59<br>$\pm 0.21$   | 4.1<br>$\pm 0.18$   | 0.62<br>$\pm 0.19$ | 6.69<br>$\pm 1.06$  | 1.48<br>$\pm 0.14$   | 2.72<br>$\pm 1.25$   | 2.59<br>$\pm 1.25$   |
| <i>Phvul.002G083600</i> | Pollen allergen /Rare lipoprotein A (RlpA)-like double-psi $\beta$ -barrel | 68.8<br>$\pm 11.82$      | 57.44<br>$\pm 14.71$ | 16.78<br>$\pm 6.39$ | 3.84<br>$\pm 1.61$ | 38.81<br>$\pm 4.27$ | 70.09<br>$\pm 4.12$  | 9.09<br>$\pm 4.43$   | 18.04<br>$\pm 8.05$  |
| <i>Phvul.002G153900</i> | Dehydration-responsive element-binding protein 1E-related                  | 0<br>$\pm 0$             | 0<br>$\pm 0$         | 0<br>$\pm 0$        | 0<br>$\pm 0$       | 0.39<br>$\pm 0.24$  | 0<br>$\pm 0$         | 0.05<br>$\pm 0.05$   | 0.84<br>$\pm 0.84$   |
| <i>Phvul.003G080100</i> | Multi-copper oxidase                                                       | 3.6<br>$\pm 0.81$        | 2.1<br>$\pm 0.59$    | 1.24<br>$\pm 0.25$  | 0.22<br>$\pm 0.05$ | 5.94<br>$\pm 2.17$  | 1.51<br>$\pm 0.2$    | 0.54<br>$\pm 0.23$   | 0.87<br>$\pm 0.4$    |
| <i>Phvul.004G093200</i> | Light-harvesting complex II chlorophyll a/b binding protein 1 (LHCB1)      | 53.17<br>$\pm 21.56$     | 11.06<br>$\pm 3.83$  | 19.7<br>$\pm 5.46$  | 2.23<br>$\pm 0.29$ | 80.64<br>$\pm 3.96$ | 5.44<br>$\pm 2.44$   | 26.74<br>$\pm 13.12$ | 21.01<br>$\pm 16.71$ |
| <i>Phvul.006G207900</i> | Copper transport protein ATOX1-related                                     | 12.05<br>$\pm 2.66$      | 12.74<br>$\pm 1.92$  | 4.47<br>$\pm 1.33$  | 0.35<br>$\pm 0.03$ | 13.46<br>$\pm 2.35$ | 13.77<br>$\pm 1.21$  | 2.36<br>$\pm 1.18$   | 3.92<br>$\pm 1.71$   |
| <i>Phvul.007G196500</i> | No functional annotation                                                   | 0.38<br>$\pm 0.39$       | 0<br>$\pm 0$         | 0<br>$\pm 0$        | 0<br>$\pm 0$       | 0.54<br>$\pm 0.27$  | 0.16<br>$\pm 0.16$   | 0.12<br>$\pm 0.12$   | 0.87<br>$\pm 0.28$   |
| <i>Phvul.008G030300</i> | No functional annotation                                                   | 45.29<br>$\pm 8.15$      | 37.29<br>$\pm 19.56$ | 11.61<br>$\pm 2.29$ | 1.02<br>$\pm 0.7$  | 45.75<br>$\pm 8.17$ | 52.63<br>$\pm 12.53$ | 6.67<br>$\pm 3.44$   | 7.41<br>$\pm 3.81$   |
| <i>Phvul.008G100300</i> | Embryo-specific protein 3                                                  | 3.4<br>$\pm 0.17$        | 1.62<br>$\pm 0.92$   | 4.27<br>$\pm 0.51$  | 0.5<br>$\pm 0.04$  | 3.13<br>$\pm 0.06$  | 2.57<br>$\pm 0.4$    | 2.46<br>$\pm 0.98$   | 2.42<br>$\pm 0.73$   |

Table S9 continued

| Gene ID                 | Gene Annotation                            | Transcript levels (FPKM) |                       |                     |                   |                       |                       |                       |                     |
|-------------------------|--------------------------------------------|--------------------------|-----------------------|---------------------|-------------------|-----------------------|-----------------------|-----------------------|---------------------|
|                         |                                            | Mock inoculation         |                       |                     |                   | Xap inoculation       |                       |                       |                     |
|                         |                                            | 0 h PI                   | 8 h PI                | 24 h PI             | 48 h PI           | 0 h PI                | 8 h PI                | 24 h PI               | 48 h PI             |
| <i>Phvul.008G137700</i> | Epidermal patterning factor-like protein 9 | 11.38<br>±2.52           | 9.36<br>±5.91         | 3.18<br>±1.5        | 0.67<br>±0.25     | 12.41<br>±3.56        | 11.44<br>±1.81        | 1.83<br>±0.8          | 2.8<br>±1.45        |
| <i>Phvul.008G248000</i> | Expansin-A8                                | 1.66<br>±0.45            | 1.06<br>±0.57         | 0.49<br>±0.09       | 0<br>±0           | 2.45<br>±0.81         | 1.69<br>±0.46         | 0.71<br>±0.52         | 0.63<br>±0.32       |
| <i>Phvul.008G261200</i> | Protein ELF4-like 1                        | 24.67<br>±24.54          | 47.59<br>±24.03       | 0.37<br>±0.25       | 0<br>±0           | 0.34<br>±0.07         | 73.97<br>±1.7         | 0.06<br>±0.06         | 0.69<br>±0.15       |
| <i>Phvul.009G187400</i> | Gibberellin-regulated protein 4            | 161.56<br>±64.34         | 193.6<br>±96.9        | 15.6<br>±7.07       | 2.03<br>±0.92     | 104.6<br>±4.81        | 269.09<br>±42.92      | 8.67<br>±4.82         | 9.62<br>±3.6        |
| <i>Phvul.010G129900</i> | Germin-like protein subfamily 3            | 634.04<br>±<br>469.3     | 977.85<br>±<br>497.08 | 51.89<br>±<br>22.68 | 7.28<br>±<br>1.77 | 441.73<br>±<br>150.71 | 1701.17<br>±<br>159.9 | 24.56<br>±<br>10.55   | 34.04<br>±<br>13.51 |
| <i>Phvul.011G063800</i> | Expansin-A6                                | 50.07<br>±20.99          | 8.09<br>±4.22         | 9.72<br>±2.7        | 2.26<br>±0.35     | 28.96<br>±1.33        | 9.69<br>±2.32         | 7.71<br>±4.27         | 10.23<br>±4.41      |
| <i>Phvul.011G209600</i> | Zinc finger protein-related                | 585.72<br>±142.6<br>8    | 250.2<br>±134.0<br>6  | 600.85<br>±34.67    | 91.94<br>±4.43    | 835.51<br>±40.86      | 365.09<br>±78.45      | 437.27<br>±209.5<br>4 | 407.22<br>±167.51   |
| XLOC_009121             | No functional annotation                   | 0<br>±0                  | 0.68<br>±0.57         | 0.15<br>±0.15       | 0.06<br>±0.06     | 0.97<br>±0.68         | 0.09<br>±0.09         | 0.58<br>±0.2          | 0.33<br>±0.17       |
| XLOC_020711             | No functional annotation                   | 0<br>±0                  | 0.54<br>±0.54         | 1.13<br>±0.57       | 0<br>±0           | 0<br>±0               | 0.46<br>±0.46         | 1.21<br>±0.62         | 1.89<br>±0.99       |

**Table S10. Transcript abundance for genes downregulated in the CBB-resistant RIL at 0 h post-inoculation (PI) with *Xanthomonas axonopodis* (Xap).** Transcript levels for individual genes corresponding to each RIL/ inoculation treatment/ sampling time PI are represented as FPKM  $\pm$  SE of three experimental replicates.

| Gene ID                                              | Gene Annotation                                  | Transcript levels (FPKM) |                       |                      |                     |                      |                      |                    |                      |
|------------------------------------------------------|--------------------------------------------------|--------------------------|-----------------------|----------------------|---------------------|----------------------|----------------------|--------------------|----------------------|
|                                                      |                                                  | Mock inoculation         |                       |                      |                     | Xap inoculation      |                      |                    |                      |
|                                                      |                                                  | 0 h PI                   | 8 h PI                | 24 h PI              | 48 h PI             | 0 h PI               | 8 h PI               | 24 h PI            | 48 h PI              |
| <i>Phvul.001G020100</i>                              | Galactolipase                                    | 31.65<br>$\pm$ 23.06     | 51.76<br>$\pm$ 20.87  | 5.26<br>$\pm$ 0.63   | 5.38<br>$\pm$ 0.67  | 7.79<br>$\pm$ 0.84   | 51.22<br>$\pm$ 22.05 | 7.29<br>$\pm$ 1.51 | 11.57<br>$\pm$ 5.4   |
| <i>Phvul.001G033700</i>                              | Cytosolic resiniferatoxin binding protein RBP-26 | 4.12<br>$\pm$ 3.04       | 10.22<br>$\pm$ 5.15   | 1.41<br>$\pm$ 0.28   | 1.29<br>$\pm$ 0.08  | 0.85<br>$\pm$ 0.19   | 8.2<br>$\pm$ 3.82    | 1.29<br>$\pm$ 0.5  | 0.86<br>$\pm$ 0.06   |
| <i>Phvul.001G087300</i>                              | Zinc finger protein<br>CONSTANS-like 14-related  | 2.03<br>$\pm$ 1.89       | 3.22<br>$\pm$ 1.54    | 0.1<br>$\pm$ 0.03    | 0.12<br>$\pm$ 0.04  | 0.42<br>$\pm$ 0.03   | 3.2<br>$\pm$ 1.35    | 0.24<br>$\pm$ 0.06 | 0.16<br>$\pm$ 0.04   |
| <i>Phvul.001G154400</i>                              | Auxin canalisation                               | 0.8<br>$\pm$ 0.61        | 1.45<br>$\pm$ 0.63    | 0.06<br>$\pm$ 0.02   | 0.11<br>$\pm$ 0.03  | 0.16<br>$\pm$ 0.02   | 1.17<br>$\pm$ 0.48   | 0.12<br>$\pm$ 0.02 | 0.08<br>$\pm$ 0.01   |
| <i>Phvul.001G156900</i>                              | Galactolipase /<br>Triacylglycerol lipase        | 108.88<br>$\pm$ 83.07    | 117.59<br>$\pm$ 73.13 | 73.66<br>$\pm$ 28.83 | 41.58<br>$\pm$ 25.8 | 21.21<br>$\pm$ 11.89 | 85.58<br>$\pm$ 41.27 | 72.25<br>$\pm$ 9.1 | 61.64<br>$\pm$ 29.15 |
| <i>Phvul.001G255400</i>                              | SufE-like protein 2,<br>chloroplastic            | 0.9<br>$\pm$ 0.36        | 0.67<br>$\pm$ 0.24    | 1.27<br>$\pm$ 0.35   | 2.38<br>$\pm$ 1.39  | 0<br>$\pm$ 0         | 0.59<br>$\pm$ 0.28   | 0.81<br>$\pm$ 0.31 | 5.63<br>$\pm$ 0.23   |
| <i>Phvul.001G263300</i>                              | No functional annotation                         | 4.52<br>$\pm$ 3.74       | 7.79<br>$\pm$ 3.06    | 4.82<br>$\pm$ 1.1    | 11.37<br>$\pm$ 4.4  | 0.9<br>$\pm$ 0.18    | 7.98<br>$\pm$ 4.1    | 6.57<br>$\pm$ 0.99 | 10.46<br>$\pm$ 1.76  |
| <i>Phvul.001G234700</i> ,<br><i>Phvul.001G234800</i> | Tropinone reductase I                            | 8.84<br>$\pm$ 7.03       | 11.74<br>$\pm$ 4.92   | 2.83<br>$\pm$ 0.29   | 2.53<br>$\pm$ 0.14  | 2.12<br>$\pm$ 0.42   | 12.97<br>$\pm$ 5.55  | 2.68<br>$\pm$ 0.25 | 2.59<br>$\pm$ 0.62   |
| <i>Phvul.002G028500</i>                              | Polyol transporter 3-related                     | 5.23<br>$\pm$ 4.13       | 5.11<br>$\pm$ 1.61    | 0.43<br>$\pm$ 0.1    | 0.66<br>$\pm$ 0.2   | 0.82<br>$\pm$ 0.39   | 5.82<br>$\pm$ 2.42   | 0.72<br>$\pm$ 0.16 | 1.03<br>$\pm$ 0.11   |
| <i>Phvul.002G100501</i>                              | LOB domain-containing<br>protein 4               | 1.14<br>$\pm$ 0.69       | 1.25<br>$\pm$ 0.51    | 0.73<br>$\pm$ 0.1    | 0.62<br>$\pm$ 0.28  | 0.18<br>$\pm$ 0.08   | 1.7<br>$\pm$ 0.9     | 2.31<br>$\pm$ 0.69 | 0.94<br>$\pm$ 0.2    |
| <i>Phvul.002G168400</i>                              | Glycogen phosphorylase                           | 9.21<br>$\pm$ 7.78       | 17.11<br>$\pm$ 8.79   | 0.74<br>$\pm$ 0.13   | 0.59<br>$\pm$ 0.1   | 1.39<br>$\pm$ 0.16   | 13.5<br>$\pm$ 6.21   | 0.83<br>$\pm$ 0.08 | 0.74<br>$\pm$ 0.1    |
| <i>Phvul.002G240900</i>                              | WRKY transcription factor<br>65-related          | 0.68<br>$\pm$ 0.57       | 1.18<br>$\pm$ 0.52    | 0.12<br>$\pm$ 0.02   | 0.19<br>$\pm$ 0.09  | 0<br>$\pm$ 0         | 1.11<br>$\pm$ 0.51   | 0.1<br>$\pm$ 0.03  | 0.51<br>$\pm$ 0.1    |
| <i>Phvul.002G303700</i>                              | SAUR family protein                              | 9.69<br>$\pm$ 4.23       | 15.36<br>$\pm$ 5.16   | 7.97<br>$\pm$ 1.7    | 8.44<br>$\pm$ 0.97  | 1.71<br>$\pm$ 0.19   | 12.66<br>$\pm$ 5.37  | 6.84<br>$\pm$ 0.98 | 7.44<br>$\pm$ 1.37   |

Table S10 continued

| Gene ID                 | Gene Annotation                                                                            | Transcript levels (FPKM) |                 |                 |                 |                 |                 |                 |                |
|-------------------------|--------------------------------------------------------------------------------------------|--------------------------|-----------------|-----------------|-----------------|-----------------|-----------------|-----------------|----------------|
|                         |                                                                                            | Mock inoculation         |                 |                 |                 | Xap inoculation |                 |                 |                |
|                         |                                                                                            | 0 h PI                   | 8 h PI          | 24 h PI         | 48 h PI         | 0 h PI          | 8 h PI          | 24 h PI         | 48 h PI        |
| <i>Phvul.002G044500</i> | PPR repeat (PPR) // PPR repeat family (PPR_2) // DYW family of nucleic acid deaminases     | 0.74<br>±0.59            | 0.79<br>±0.35   | 0.3<br>±0.06    | 0.45<br>±0.12   | 0.12<br>±0.02   | 0.98<br>±0.44   | 0.35<br>±0.08   | 0.55<br>±0.16  |
| <i>Phvul.003G157900</i> | No functional annotation                                                                   | 4.41<br>±1.61            | 1.53<br>±0.79   | 9.26<br>±2.11   | 0.75<br>±0.74   | 0<br>±0         | 3.77<br>±1.44   | 5.92<br>±4.83   | 2.48<br>±0.05  |
| <i>Phvul.003G206400</i> | Cytochrome P450 CYP2 subfamily                                                             | 1.67<br>±1.45            | 4.84<br>±2.48   | 0.19<br>±0.13   | 0.24<br>±0.07   | 0.14<br>±0.05   | 3.96<br>±1.95   | 0.23<br>±0.08   | 0.28<br>±0.02  |
| <i>Phvul.003G255700</i> | No functional annotation                                                                   | 9.62<br>±8.27            | 11.72<br>±5.87  | 1.07<br>±0.49   | 2.04<br>±0.57   | 1.32<br>±0.47   | 12.58<br>±5.67  | 1.49<br>±0.43   | 1.18<br>±0.4   |
| <i>Phvul.003G047100</i> | Glucosyl/glucuronosyl transferases                                                         | 4.06<br>±3.06            | 4.05<br>±2.33   | 14.77<br>±4.93  | 5.3<br>±3.07    | 0.46<br>±0.17   | 4.44<br>±2.47   | 13.2<br>±2.74   | 3.05<br>±1.29  |
| <i>Phvul.003G162800</i> | Aspartate racemase                                                                         | 0.7<br>±0.44             | 0.56<br>±0.39   | 0.55<br>±0.06   | 0.42<br>±0.19   | 0.17<br>±0.06   | 0.87<br>±0.38   | 0.33<br>±0.18   | 0.41<br>±0.08  |
| <i>Phvul.003G219200</i> | Bifunctional inhibitor/ Lipid-transfer protein/seed storage 2S albumin superfamily protein | 1.28<br>±1.02            | 1.57<br>±0.61   | 1.48<br>±0.78   | 1.44<br>±0.3    | 0.23<br>±0.07   | 2.45<br>±1.11   | 3.03<br>±0.32   | 0.91<br>±0.48  |
| <i>Phvul.004G137600</i> | DR4 protein-related                                                                        | 22.04<br>±18.58          | 23.79<br>±14.25 | 54.85<br>±16.75 | 20.05<br>±10.36 | 2.78<br>±1.15   | 22.39<br>±12.29 | 59.21<br>±15.85 | 13.59<br>±5.68 |
| <i>Phvul.004G135700</i> | PPR repeat (PPR) // PPR repeat family (PPR_2)                                              | 1.3<br>±0.87             | 1.51<br>±0.61   | 0.46<br>±0.05   | 0.49<br>±0.07   | 0.18<br>±0.02   | 1.4<br>±0.5     | 0.61<br>±0.13   | 0.93<br>±0.11  |
| <i>Phvul.004G160800</i> | α/β Hydrolase fold-containing protein                                                      | 36.74<br>±30.46          | 57.75<br>±26.56 | 11.51<br>±1.43  | 9.38<br>±1.94   | 5.65<br>±1.08   | 58.1<br>±27.15  | 9.1<br>±1.1     | 5.43<br>±0.7   |
| <i>Phvul.005G001000</i> | X-Box transcription factor-related                                                         | 7.39<br>±5.89            | 6.66<br>±3.98   | 21.15<br>±7.97  | 9.03<br>±5.16   | 1.7<br>±0.96    | 7.93<br>±4.38   | 20.28<br>±4.91  | 5.37<br>±1.61  |
| <i>Phvul.005G032600</i> | Dirigent protein 20-related                                                                | 7.52<br>±5.04            | 6.84<br>±3.62   | 31.04<br>±9.23  | 14.7<br>±6.08   | 1.4<br>±0.72    | 7.16<br>±3.01   | 32.1<br>±6.03   | 6.91<br>±2.71  |

Table S10 continued

| Gene ID                                              | Gene Annotation                                                                          | Transcript levels (FPKM) |                        |                        |                       |                     |                       |                       |                      |
|------------------------------------------------------|------------------------------------------------------------------------------------------|--------------------------|------------------------|------------------------|-----------------------|---------------------|-----------------------|-----------------------|----------------------|
|                                                      |                                                                                          | Mock inoculation         |                        |                        |                       | Xap inoculation     |                       |                       |                      |
|                                                      |                                                                                          | 0 h PI                   | 8 h PI                 | 24 h PI                | 48 h PI               | 0 h PI              | 8 h PI                | 24 h PI               | 48 h PI              |
| <i>Phvul.005G075200</i>                              | Cathepsin H / N-benzoylarginine- $\beta$ -naphthylamide hydrolase                        | 0.85<br>$\pm 0.22$       | 0.66<br>$\pm 0.16$     | 0.82<br>$\pm 0.23$     | 0.76<br>$\pm 0.21$    | 0.16<br>$\pm 0.05$  | 0.43<br>$\pm 0.12$    | 0.66<br>$\pm 0.16$    | 0.85<br>$\pm 0.11$   |
| <i>Phvul.005G120400</i>                              | PPR repeat (PPR) // PPR repeat (PPR_1)                                                   | 0.88<br>$\pm 0.79$       | 1.26<br>$\pm 0.61$     | 0.38<br>$\pm 0.08$     | 0.45<br>$\pm 0.14$    | 0.2<br>$\pm 0.07$   | 1.24<br>$\pm 0.59$    | 0.56<br>$\pm 0.09$    | 0.7<br>$\pm 0.14$    |
| <i>Phvul.005G156900</i>                              | Linoleate 9S-lipoxygenase                                                                | 181.7<br>$\pm 141.39$    | 207.98<br>$\pm 119.73$ | 290.11<br>$\pm 136.69$ | 112.24<br>$\pm 69.14$ | 39.2<br>$\pm 15.97$ | 233.48<br>$\pm 113.2$ | 288.57<br>$\pm 71.01$ | 59.56<br>$\pm 27.01$ |
| <i>Phvul.005G080600</i>                              | $\gamma$ -Glutamyl hydrolase                                                             | 15.27<br>$\pm 13.03$     | 16.13<br>$\pm 10.37$   | 6.19<br>$\pm 3.51$     | 1.4<br>$\pm 0.29$     | 1.86<br>$\pm 0.33$  | 14.45<br>$\pm 8.2$    | 4.02<br>$\pm 0.96$    | 1.24<br>$\pm 0.22$   |
| <i>Phvul.005G156800</i>                              | Linoleate 9S-lipoxygenase                                                                | 76.8<br>$\pm 65.79$      | 79.03<br>$\pm 49.09$   | 140.86<br>$\pm 44.72$  | 76.64<br>$\pm 38.7$   | 9.12<br>$\pm 5.13$  | 97.09<br>$\pm 49.93$  | 167.41<br>$\pm 43.87$ | 68.4<br>$\pm 15.99$  |
| <i>Phvul.003G188300</i> ,<br><i>Phvul.003G188400</i> | PPR repeat (PPR) // PPR repeat family (PPR_2) // Pentatricopeptide repeat domain (PPR_3) | 11.17<br>$\pm 9.38$      | 17.67<br>$\pm 8.12$    | 1.55<br>$\pm 0.18$     | 1.94<br>$\pm 0.08$    | 2.06<br>$\pm 0.29$  | 21.38<br>$\pm 9.73$   | 1.82<br>$\pm 0.12$    | 1.51<br>$\pm 0.04$   |
| <i>Phvul.006G034000</i>                              | UDP-glucose 4,6-dehydratase                                                              | 1.88<br>$\pm 1.52$       | 1.54<br>$\pm 1.04$     | 5.05<br>$\pm 1.76$     | 2.19<br>$\pm 1.28$    | 0.17<br>$\pm 0.08$  | 1.71<br>$\pm 1.11$    | 5.31<br>$\pm 0.87$    | 2.15<br>$\pm 1.26$   |
| <i>Phvul.006G146400</i>                              | Chitin elicitor receptor kinase 1                                                        | 1.17<br>$\pm 0.88$       | 2.32<br>$\pm 1.11$     | 0.27<br>$\pm 0.09$     | 0.21<br>$\pm 0.05$    | 0.21<br>$\pm 0.05$  | 1.83<br>$\pm 0.87$    | 0.33<br>$\pm 0.03$    | 0.25<br>$\pm 0.05$   |
| <i>Phvul.007G017600</i>                              | No functional annotation                                                                 | 1.15<br>$\pm 0.48$       | 0.97<br>$\pm 0.57$     | 0.19<br>$\pm 0.1$      | 0.14<br>$\pm 0.08$    | 0.24<br>$\pm 0.08$  | 0.66<br>$\pm 0.27$    | 0.16<br>$\pm 0.05$    | 0.02<br>$\pm 0.02$   |
| <i>Phvul.007G135800</i>                              | Glucosyl/glucuronosyl transferases                                                       | 1.39<br>$\pm 1.24$       | 2.98<br>$\pm 1.57$     | 0.17<br>$\pm 0.06$     | 0.1<br>$\pm 0.02$     | 0.2<br>$\pm 0.03$   | 1.91<br>$\pm 0.81$    | 0.24<br>$\pm 0.05$    | 0.09<br>$\pm 0.03$   |
| <i>Phvul.007G050900</i>                              | Cysteine-rich receptor-like protein kinase 9-related                                     | 7.55<br>$\pm 6.18$       | 12.15<br>$\pm 5.03$    | 1.78<br>$\pm 0.15$     | 3.24<br>$\pm 0.39$    | 1.38<br>$\pm 0.22$  | 10<br>$\pm 4.33$      | 3<br>$\pm 0.32$       | 3.74<br>$\pm 0.5$    |

Table S10 continued

| Gene ID                 | Gene Annotation                                                                                                            | Transcript levels (FPKM) |                  |                 |                  |                 |                  |                |                  |
|-------------------------|----------------------------------------------------------------------------------------------------------------------------|--------------------------|------------------|-----------------|------------------|-----------------|------------------|----------------|------------------|
|                         |                                                                                                                            | Mock inoculation         |                  |                 |                  | Xap inoculation |                  |                |                  |
|                         |                                                                                                                            | 0 h PI                   | 8 h PI           | 24 h PI         | 48 h PI          | 0 h PI          | 8 h PI           | 24 h PI        | 48 h PI          |
| <i>Phvul.008G257300</i> | CCT motif                                                                                                                  | 17.09<br>±16.99          | 38.71<br>±19.34  | 0.06<br>±0.04   | 0.06<br>±0.03    | 0.23<br>±0.04   | 34.57<br>±17.25  | 0.09<br>±0.09  | 0.05<br>±0.03    |
| <i>Phvul.008G079600</i> | PPR repeat (PPR) // PPR repeat (PPR_1) // Pentatricopeptide repeat domain (PPR_3) // DYW family of nucleic acid deaminases | 0.66<br>±0.44            | 1.11<br>±0.55    | 0.4<br>±0.08    | 0.44<br>±0.13    | 0.08<br>±0.02   | 0.95<br>±0.43    | 0.34<br>±0.06  | 0.67<br>±0.02    |
| <i>Phvul.008G128700</i> | β-Amyrin 24-hydroxylase / Sophoradiol 24-hydroxylase                                                                       | 9.04<br>±7.5             | 8.51<br>±5.32    | 30.75<br>±11.85 | 8.9<br>±4.92     | 1.61<br>±1.01   | 10.02<br>±5.48   | 27.86<br>±5.24 | 3.63<br>±1.55    |
| <i>Phvul.008G152900</i> | Permease of the drug/metabolite transporter (DMT) superfamily                                                              | 18.65<br>±10.57          | 28.74<br>±10.17  | 8.74<br>±1.15   | 9.11<br>±0.7     | 4.58<br>±0.68   | 29.19<br>±11.31  | 9.85<br>±0.08  | 8.38<br>±1.52    |
| <i>Phvul.008G211800</i> | Niemann pick type C2 protein NPC2-related                                                                                  | 5.22<br>±5.01            | 5.73<br>±4.5     | 7.79<br>±4.61   | 3.5<br>±1.74     | 0.23<br>±0.13   | 5.22<br>±3.03    | 8.87<br>±1.16  | 1.07<br>±0.6     |
| <i>Phvul.009G002200</i> | Amidophosphoribosyl-transferase / Phosphoribosyldiphosphate 5-amidotransferase                                             | 39.43<br>±28.42          | 68.34<br>±28.52  | 13.52<br>±1.68  | 21.89<br>±1.18   | 8.53<br>±1.25   | 69.99<br>±31.74  | 16.67<br>±1.44 | 27.26<br>±1.09   |
| <i>Phvul.009G146800</i> | Alginate lyase                                                                                                             | 20.59<br>±17.51          | 45.57<br>±20.52  | 6.15<br>±0.98   | 9.23<br>±3.94    | 2.62<br>±0.43   | 43.42<br>±20.38  | 6.53<br>±0.28  | 14.43<br>±6.4    |
| <i>Phvul.010G143100</i> | Leucine-rich repeat protein kinase-related                                                                                 | 0.97<br>±0.81            | 1.95<br>±0.96    | 0.13<br>±0.01   | 0.2<br>±0.03     | 0.12<br>±0.04   | 1.67<br>±0.74    | 0.15<br>±0.02  | 0.3<br>±0.03     |
| <i>Phvul.010G162600</i> | DnaJ homolog subfamily C member                                                                                            | 64.65<br>±41.73          | 129.07<br>±52.28 | 71.22<br>±19.4  | 121.05<br>±17.36 | 10.17<br>±1.37  | 100.59<br>±52.37 | 95.07<br>±3.44 | 128.38<br>±26.56 |
| <i>Phvul.011G085200</i> | Xyloglucan:xyloglucosyl transferase                                                                                        | 18.66<br>±11.69          | 16.01<br>±5.57   | 17.56<br>±2.86  | 8.62<br>±3.06    | 3.29<br>±0.8    | 18.32<br>±6.81   | 23.96<br>±2.08 | 2.99<br>±0.95    |
| <i>Phvul.011G125700</i> | E3 ubiquitin-protein ligase RNF1/2                                                                                         | 26.3<br>±21.83           | 39.01<br>±18.63  | 6.07<br>±0.47   | 5.65<br>±0.45    | 4.23<br>±0.21   | 37.29<br>±18.37  | 5.82<br>±0.19  | 7.15<br>±0.28    |

Table S10 continued

| Gene ID                                                                                                                                     | Gene Annotation                            | Transcript levels (FPKM) |                 |                  |                 |                        |                 |                  |                 |
|---------------------------------------------------------------------------------------------------------------------------------------------|--------------------------------------------|--------------------------|-----------------|------------------|-----------------|------------------------|-----------------|------------------|-----------------|
|                                                                                                                                             |                                            | Mock inoculation         |                 |                  |                 | <i>Xap</i> inoculation |                 |                  |                 |
|                                                                                                                                             |                                            | 0 h PI                   | 8 h PI          | 24 h PI          | 48 h PI         | 0 h PI                 | 8 h PI          | 24 h PI          | 48 h PI         |
| <i>Phvul.011G167000</i>                                                                                                                     | Chitinase                                  | 7.32<br>±7.06            | 6.03<br>±4.42   | 14<br>±9.98      | 2.99<br>±2.23   | 0.17<br>±0.1           | 3.48<br>±1.85   | 9.19<br>±1.77    | 2.54<br>±0.46   |
| <i>Phvul.011G018000</i>                                                                                                                     | Alcohol dehydrogenase related              | 7<br>±5.46               | 15.56<br>±7.1   | 0.77<br>±0.05    | 0.89<br>±0.13   | 1.61<br>±0.31          | 12.43<br>±5.21  | 0.93<br>±0.28    | 0.7<br>±0.16    |
| <i>Phvul.007G276500</i> ,<br><i>Phvul.007G276600</i>                                                                                        | No functional annotation                   | 89.3<br>±73.34           | 75.74<br>±47.75 | 151.45<br>±91.16 | 39.43<br>±23.99 | 15.6<br>±6.73          | 70.5<br>±46.32  | 119.51<br>±51.52 | 137.18<br>±62.5 |
| <i>Phvul.004G129600</i> ,<br><i>Phvul.004G129700</i> ,<br><i>Phvul.004G129800</i> ,<br><i>Phvul.004G129900</i> ,<br><i>Phvul.004G130000</i> | DR4 protein-related                        | 25.05<br>±21.45          | 17.98<br>±9.37  | 28.58<br>±11.88  | 12.56<br>±7.33  | 1.81<br>±0.96          | 18.56<br>±9.14  | 32.63<br>±7.77   | 14.44<br>±6.13  |
| <i>Phvul.010G134900</i> ,<br><i>Phvul.010G135000</i>                                                                                        | Linoleate 13S-lipoxygenase /<br>Lipoxidase | 84.61<br>±73.62          | 77.78<br>±49.63 | 123.84<br>±40.64 | 60.48<br>±35.79 | 12.28<br>±6.45         | 99.21<br>±50.37 | 141.3<br>±44.79  | 45.94<br>±19.79 |
| <i>Phvul.008G228814</i> ,<br><i>Phvul.008G229000</i> ,<br><i>Phvul.008G229400</i>                                                           | Proprotein convertase<br>subtilisin/ Kexin | 16.57<br>±14.8           | 20.03<br>±14.98 | 9.97<br>±6.51    | 2.08<br>±0.1    | 1.7<br>±0.47           | 10.76<br>±5.29  | 7.67<br>±0.57    | 0.94<br>±0.23   |
| XLOC_015034                                                                                                                                 | No functional annotation                   | 0.83<br>±0.53            | 0.76<br>±0.39   | 1.25<br>±0.44    | 1.06<br>±0.96   | 0<br>±0                | 0.27<br>±0.17   | 2.48<br>±0.31    | 2.03<br>±0.28   |
| XLOC_025196                                                                                                                                 | No functional annotation                   | 1.1<br>±0.79             | 1.88<br>±1.14   | 1.36<br>±0.69    | 3.55<br>±2.4    | 0<br>±0                | 1.19<br>±0.79   | 4.04<br>±1.3     | 6.81<br>±0.39   |



**Table S11. Transcript abundance for genes downregulated in the CBB-resistant RIL at 8 h post-inoculation (PI) with *Xanthomonas axonopodis* (Xap).** Transcript levels for individual genes corresponding to each RIL/ inoculation treatment/ sampling time PI are represented as FPKM  $\pm$  SE of three experimental replicates.

| Gene ID                                                                           | Gene Annotation                                                                                                             | Transcript levels (FPKM) |                    |                    |                   |                    |                    |                    |                    |
|-----------------------------------------------------------------------------------|-----------------------------------------------------------------------------------------------------------------------------|--------------------------|--------------------|--------------------|-------------------|--------------------|--------------------|--------------------|--------------------|
|                                                                                   |                                                                                                                             | Mock inoculation         |                    |                    |                   | Xap inoculation    |                    |                    |                    |
|                                                                                   |                                                                                                                             | 0 h PI                   | 8 h PI             | 24 h PI            | 48 h PI           | 0 h PI             | 8 h PI             | 24 h PI            | 48 h PI            |
| <i>Phvul.004G142500</i> ,<br><i>Phvul.004G142600</i> ,<br><i>Phvul.004G142700</i> | Protein phosphatase 1, regulatory subunit, and related proteins; Leucine Rich Repeat (LRR_1) // Leucine rich repeat (LRR_8) | 1.38<br>$\pm 0.89$       | 0.72<br>$\pm 0.25$ | 1.01<br>$\pm 0.24$ | 0.57<br>$\pm 0.3$ | 0.23<br>$\pm 0.18$ | 0.16<br>$\pm 0.06$ | 0.64<br>$\pm 0.47$ | 1.39<br>$\pm 0.45$ |
| XLOC_015051                                                                       | No functional annotation                                                                                                    | 1.63<br>$\pm 0.84$       | 0.84<br>$\pm 0.42$ | 1.91<br>$\pm 0.23$ | 2.8<br>$\pm 0.41$ | 0.41<br>$\pm 0.21$ | 0<br>$\pm 0$       | 2.78<br>$\pm 0.35$ | 1.78<br>$\pm 0.95$ |
| XLOC_011019                                                                       | No functional annotation                                                                                                    | 0.35<br>$\pm 0.35$       | 1.41<br>$\pm 1.15$ | 0.71<br>$\pm 0.4$  | 0<br>$\pm 0$      | 0.78<br>$\pm 0.39$ | 0<br>$\pm 0$       | 0.58<br>$\pm 0.58$ | 0.23<br>$\pm 0.24$ |

**Table S12. Transcript abundance for genes downregulated in the CBB-resistant RIL at 24 h post-inoculation (PI) with *Xanthomonas axonopodis* (Xap).** Transcript levels for individual genes corresponding to each RIL/ inoculation treatment/ sampling time PI are represented as FPKM  $\pm$  SE of three experimental replicates.

| Gene ID                 | Gene Annotation                | Transcript levels (FPKM) |                    |                    |                    |                    |                    |                    |                    |
|-------------------------|--------------------------------|--------------------------|--------------------|--------------------|--------------------|--------------------|--------------------|--------------------|--------------------|
|                         |                                | Mock inoculation         |                    |                    |                    | Xap inoculation    |                    |                    |                    |
|                         |                                | 0 h PI                   | 8 h PI             | 24 h PI            | 48 h PI            | 0 h PI             | 8 h PI             | 24 h PI            | 48 h PI            |
| <i>Phvul.003G281200</i> | Strictosidine synthase-related | 2.87<br>$\pm 1.24$       | 4.35<br>$\pm 1.85$ | 0.83<br>$\pm 0.54$ | 0.12<br>$\pm 0.05$ | 5.01<br>$\pm 2.16$ | 3.38<br>$\pm 0.62$ | 0.21<br>$\pm 0.07$ | 0.07<br>$\pm 0.02$ |
| XLOC_002678             | No functional annotation       | 0.51<br>$\pm 0.26$       | 0.67<br>$\pm 0.43$ | 2.07<br>$\pm 1.72$ | 0.34<br>$\pm 0.33$ | 0.35<br>$\pm 0.35$ | 0.81<br>$\pm 0.54$ | 0<br>$\pm 0$       | 0.45<br>$\pm 0.23$ |

**Table S13. Transcript abundance for genes downregulated in the CBB-resistant RIL at 48 h post-inoculation (PI) with *Xanthomonas axonopodis* (Xap).** Transcript levels for individual genes corresponding to each RIL/ inoculation treatment/ sampling time PI are represented as FPKM  $\pm$  SE of three experimental replicates.

| Gene ID                 | Gene Annotation                                                             | Transcript levels (FPKM)  |                       |                       |                       |                            |                      |                      |                      |
|-------------------------|-----------------------------------------------------------------------------|---------------------------|-----------------------|-----------------------|-----------------------|----------------------------|----------------------|----------------------|----------------------|
|                         |                                                                             | Mock inoculation          |                       |                       |                       | Xap inoculation            |                      |                      |                      |
|                         |                                                                             | 0 h PI                    | 8 h PI                | 24 h PI               | 48 h PI               | 0 h PI                     | 8 h PI               | 24 h PI              | 48 h PI              |
| <i>Phvul.002G296700</i> | Upstream-binding transcription factor                                       | 0.57<br>$\pm 0.1$         | 0.52<br>$\pm 0.15$    | 0.5<br>$\pm 0.04$     | 0.64<br>$\pm 0.11$    | 0.51<br>$\pm 0.09$         | 0.52<br>$\pm 0.05$   | 0.49<br>$\pm 0.07$   | 0.12<br>$\pm 0.04$   |
| <i>Phvul.005G113800</i> | Peroxidase 3-related                                                        | 4.79<br>$\pm 1.66$        | 3.25<br>$\pm 0.92$    | 2.31<br>$\pm 0.97$    | 2.22<br>$\pm 0.66$    | 7.45<br>$\pm 0.64$         | 3.56<br>$\pm 1.58$   | 1.74<br>$\pm 0.28$   | 0.46<br>$\pm 0.18$   |
| <i>Phvul.006G202700</i> | No functional annotation                                                    | 912.7<br>$\pm 153.9$<br>4 | 873.97<br>$\pm 58.41$ | 211.87<br>$\pm 86.13$ | 128.81<br>$\pm 29.43$ | 993.88<br>$\pm 101.2$<br>6 | 788.51<br>$\pm 36.1$ | 120.08<br>$\pm 5.05$ | 31.84<br>$\pm 23.56$ |
| <i>Phvul.008G037500</i> | Pollen allergen / Rare lipoprotein A (RlpA)-like double-psi $\beta$ -barrel | 3.34<br>$\pm 1.28$        | 3.41<br>$\pm 0.81$    | 2.78<br>$\pm 0.5$     | 1.49<br>$\pm 0.14$    | 6.68<br>$\pm 2.04$         | 3.52<br>$\pm 0.52$   | 1.59<br>$\pm 0.2$    | 0.31<br>$\pm 0.07$   |
| <i>Phvul.008G174800</i> | No functional annotation                                                    | 0.98<br>$\pm 0.4$         | 0.69<br>$\pm 0.25$    | 0.31<br>$\pm 0.05$    | 1.44<br>$\pm 0.62$    | 1.56<br>$\pm 1.26$         | 1.19<br>$\pm 0.16$   | 0.76<br>$\pm 0.16$   | 0.17<br>$\pm 0.06$   |
| <i>Phvul.008G218500</i> | Peroxidase 52                                                               | 0.4<br>$\pm 0.15$         | 0.23<br>$\pm 0.16$    | 1.74<br>$\pm 0.51$    | 2.2<br>$\pm 1.18$     | 0.46<br>$\pm 0.04$         | 0.23<br>$\pm 0.13$   | 1.41<br>$\pm 0.46$   | 0.32<br>$\pm 0.15$   |

**Table S14. Transcript abundance for genes downregulated in the CBB-susceptible RIL at 0 h post-inoculation (PI) with *Xanthomonas axonopodis* (Xap).** Transcript levels for individual genes corresponding to each RIL/ inoculation treatment/ sampling time PI are represented as FPKM  $\pm$  SE of three experimental replicates.

| Gene ID                 | Gene Annotation                                                                                | Transcript levels (FPKM) |                     |                    |                    |                    |                     |                    |                    |
|-------------------------|------------------------------------------------------------------------------------------------|--------------------------|---------------------|--------------------|--------------------|--------------------|---------------------|--------------------|--------------------|
|                         |                                                                                                | Mock inoculation         |                     |                    |                    | Xap inoculation    |                     |                    |                    |
|                         |                                                                                                | 0 h PI                   | 8 h PI              | 24 h PI            | 48 h PI            | 0 h PI             | 8 h PI              | 24 h PI            | 48 h PI            |
| <i>Phvul.001G022200</i> | Cold regulated protein 27                                                                      | 17.31<br>$\pm 17.05$     | 40.72<br>$\pm 2.78$ | 0.09<br>$\pm 0.06$ | 0.05<br>$\pm 0.03$ | 0.1<br>$\pm 0.02$  | 55.98<br>$\pm 4.99$ | 0.08<br>$\pm 0.08$ | 0.09<br>$\pm 0.03$ |
| <i>Phvul.001G124300</i> | Pyrroline-5-carboxylate reductase                                                              | 9.89<br>$\pm 7.92$       | 27.61<br>$\pm 0.72$ | 1.77<br>$\pm 0.4$  | 1.35<br>$\pm 0.17$ | 1.9<br>$\pm 0.04$  | 26.29<br>$\pm 0.28$ | 1.92<br>$\pm 0.32$ | 1.59<br>$\pm 0.39$ |
| <i>Phvul.001G130900</i> | ATP-binding cassette transporter                                                               | 2.65<br>$\pm 1.63$       | 6.01<br>$\pm 0.35$  | 1.84<br>$\pm 0.14$ | 3<br>$\pm 0.69$    | 0.56<br>$\pm 0.17$ | 5.87<br>$\pm 0.73$  | 2.29<br>$\pm 0.92$ | 2.43<br>$\pm 1.11$ |
| <i>Phvul.001G162800</i> | Long-chain-alcohol oxidase                                                                     | 7.22<br>$\pm 6.35$       | 20.9<br>$\pm 1.26$  | 0.87<br>$\pm 0.21$ | 0.71<br>$\pm 0.1$  | 0.92<br>$\pm 0.18$ | 23.25<br>$\pm 0.98$ | 0.93<br>$\pm 0.14$ | 1.1<br>$\pm 0.25$  |
| <i>Phvul.001G221600</i> | PPR repeat (PPR) / DYW family of nucleic acid deaminases                                       | 0.82<br>$\pm 0.57$       | 1.51<br>$\pm 0.12$  | 0.42<br>$\pm 0.05$ | 0.55<br>$\pm 0.14$ | 0.11<br>$\pm 0.05$ | 1.83<br>$\pm 0.18$  | 0.48<br>$\pm 0.19$ | 0.59<br>$\pm 0.24$ |
| <i>Phvul.001G227500</i> | PPR repeat (PPR) / DYW family of nucleic acid deaminases                                       | 0.79<br>$\pm 0.65$       | 1.92<br>$\pm 0.06$  | 0.29<br>$\pm 0.06$ | 0.53<br>$\pm 0.13$ | 0.15<br>$\pm 0.02$ | 2.58<br>$\pm 0.41$  | 0.57<br>$\pm 0.11$ | 0.62<br>$\pm 0.11$ |
| <i>Phvul.001G247500</i> | SEL1 repeat                                                                                    | 7.09<br>$\pm 5.66$       | 18.62<br>$\pm 1.01$ | 0.71<br>$\pm 0.2$  | 0.93<br>$\pm 0.21$ | 1.4<br>$\pm 0.27$  | 19.47<br>$\pm 0.29$ | 1.01<br>$\pm 0.17$ | 1.17<br>$\pm 0.16$ |
| <i>Phvul.002G211500</i> | Oxidoreductase, 2-oxoglutarate-Fe II oxygenase family protein                                  | 1.08<br>$\pm 0.39$       | 1.2<br>$\pm 0.06$   | 0.73<br>$\pm 0.05$ | 3.54<br>$\pm 1.07$ | 0.23<br>$\pm 0.01$ | 1.02<br>$\pm 0.23$  | 2.38<br>$\pm 1.19$ | 2.58<br>$\pm 1.5$  |
| <i>Phvul.002G283000</i> | Polynucleotide adenylyltransferase domain and RNA recognition motif-containing protein-related | 8.21<br>$\pm 6.48$       | 18.62<br>$\pm 1.51$ | 4.43<br>$\pm 0.27$ | 4.74<br>$\pm 0.79$ | 1.99<br>$\pm 0.14$ | 20.95<br>$\pm 1.97$ | 4.66<br>$\pm 0.3$  | 5.62<br>$\pm 1.28$ |
| <i>Phvul.003G004400</i> | Nicotinamidase 3                                                                               | 8.07<br>$\pm 5.91$       | 22.42<br>$\pm 0.76$ | 2.56<br>$\pm 0.34$ | 2.52<br>$\pm 0.21$ | 1.84<br>$\pm 0.15$ | 28.23<br>$\pm 3.21$ | 2.37<br>$\pm 0.17$ | 2.05<br>$\pm 0.28$ |

Table S14 continued

| Gene ID                 | Gene Annotation                                                                                              | Transcript levels (FPKM) |                |               |                |                 |                 |                |               |
|-------------------------|--------------------------------------------------------------------------------------------------------------|--------------------------|----------------|---------------|----------------|-----------------|-----------------|----------------|---------------|
|                         |                                                                                                              | Mock inoculation         |                |               |                | Xap inoculation |                 |                |               |
|                         |                                                                                                              | 0 h PI                   | 8 h PI         | 24 h PI       | 48 h PI        | 0 h PI          | 8 h PI          | 24 h PI        | 48 h PI       |
| <i>Phvul.003G101100</i> | Nitrate, formate, iron dehydrogenase                                                                         | 3.15<br>±1.93            | 7.36<br>±1.09  | 2.72<br>±0.92 | 8.34<br>±1.74  | 0.55<br>±0.16   | 5.49<br>±1.45   | 8.82<br>±6.33  | 7.69<br>±4.1  |
| <i>Phvul.003G157500</i> | PPR repeat (PPR) / DYW family of nucleic acid deaminases                                                     | 0.57<br>±0.36            | 1.25<br>±0.12  | 0.3<br>±0.03  | 0.54<br>±0.04  | 0.13<br>±0.08   | 1.25<br>±0.18   | 0.35<br>±0.1   | 0.31<br>±0.06 |
| <i>Phvul.003G162300</i> | PPR repeat (PPR) // PPR repeat (PPR_1) // PPR repeat family (PPR_2) // DYW family of nucleic acid deaminases | 4.23<br>±3.14            | 10.52<br>±0.34 | 0.88<br>±0.3  | 0.75<br>±0.18  | 0.89<br>±0.13   | 11.33<br>±0.48  | 1<br>±0.17     | 1.01<br>±0.22 |
| <i>Phvul.003G189800</i> | PPR repeat (PPR) // PPR repeat family (PPR_2) // DYW family of nucleic acid deaminases                       | 1.09<br>±0.77            | 2.27<br>±0.08  | 0.46<br>±0.07 | 0.81<br>±0.21  | 0.19<br>±0.03   | 2.29<br>±0.46   | 0.62<br>±0.2   | 0.52<br>±0.09 |
| <i>Phvul.003G229500</i> | PPR repeat (PPR) // PPR repeat family (PPR_2)                                                                | 36.46<br>±29.38          | 98.5<br>±3.26  | 9.24<br>±1.4  | 11.13<br>±2.66 | 8.84<br>±0.23   | 104.06<br>±2.37 | 12.29<br>±2.55 | 11.2<br>±1.32 |
| <i>Phvul.004G047900</i> | Proline dehydrogenase                                                                                        | 1.12<br>±0.8             | 2.47<br>±0.38  | 0.57<br>±0.23 | 1.01<br>±0.46  | 0.24<br>±0.03   | 2.88<br>±0.1    | 1.11<br>±0.39  | 0.9<br>±0.13  |
| <i>Phvul.004G083200</i> | Acyl-CoA N-acyltransferases superfamily protein                                                              | 13.38<br>±10.01          | 32.92<br>±0.55 | 1.26<br>±0.1  | 1.4<br>±0.25   | 2.85<br>±0.32   | 33.55<br>±0.61  | 1.28<br>±0.18  | 1.14<br>±0.19 |
| <i>Phvul.004G128500</i> | APO protein 1, chloroplastic                                                                                 | 5.26<br>±4.21            | 13.62<br>±1.02 | 1.29<br>±0.16 | 2.13<br>±0.21  | 0.94<br>±0.08   | 14.85<br>±0.66  | 1.22<br>±0.23  | 1.51<br>±0.21 |
| <i>Phvul.004G133300</i> | No functional annotation                                                                                     | 1.27<br>±1.11            | 2.8<br>±0.25   | 0.44<br>±0.04 | 0.6<br>±0.16   | 0.26<br>±0.01   | 3.38<br>±0.4    | 0.61<br>±0.22  | 0.65<br>±0.21 |
| <i>Phvul.004G151100</i> | Zinc finger protein                                                                                          | 4.66<br>±3.97            | 9.81<br>±1.46  | 2.94<br>±0.62 | 4<br>±0.3      | 1.06<br>±0.22   | 11.69<br>±2.02  | 2.43<br>±0.51  | 3.87<br>±0.88 |
| <i>Phvul.004G151525</i> | EF-hand calcium-binding domain containing protein                                                            | 15.77<br>±11.48          | 34.1<br>±2.7   | 3.12<br>±0.58 | 1.81<br>±0.42  | 3.35<br>±0.8    | 31.25<br>±1.19  | 3.31<br>±0.29  | 1.11<br>±0.43 |

Table S14 continued

| Gene ID                 | Gene Annotation                                          | Transcript levels (FPKM) |                      |                    |                     |                     |                      |                     |                    |
|-------------------------|----------------------------------------------------------|--------------------------|----------------------|--------------------|---------------------|---------------------|----------------------|---------------------|--------------------|
|                         |                                                          | Mock inoculation         |                      |                    |                     | Xap inoculation     |                      |                     |                    |
|                         |                                                          | 0 h PI                   | 8 h PI               | 24 h PI            | 48 h PI             | 0 h PI              | 8 h PI               | 24 h PI             | 48 h PI            |
| <i>Phvul.005G039200</i> | Vicianin $\beta$ -glucosidase                            | 39.58<br>$\pm 32.27$     | 95.77<br>$\pm 12.14$ | 2.5<br>$\pm 0.26$  | 1.64<br>$\pm 0.21$  | 8.95<br>$\pm 1.64$  | 91.11<br>$\pm 3.44$  | 2.38<br>$\pm 0.2$   | 2.18<br>$\pm 0.57$ |
| <i>Phvul.005G124400</i> | PPR repeat (PPR) / DYW family of nucleic acid deaminases | 2.66<br>$\pm 1.97$       | 6.26<br>$\pm 0.55$   | 0.76<br>$\pm 0.22$ | 0.82<br>$\pm 0.21$  | 0.46<br>$\pm 0.1$   | 6.75<br>$\pm 0.38$   | 0.75<br>$\pm 0.24$  | 0.94<br>$\pm 0.08$ |
| <i>Phvul.005G159300</i> | PPR repeat (PPR) // PPR repeat family (PPR_2)            | 1.02<br>$\pm 0.83$       | 2.16<br>$\pm 0.14$   | 0.37<br>$\pm 0.02$ | 0.64<br>$\pm 0.18$  | 0.24<br>$\pm 0.08$  | 2.07<br>$\pm 0.19$   | 0.48<br>$\pm 0.08$  | 0.53<br>$\pm 0.13$ |
| <i>Phvul.005G174500</i> | Protein of unknown function                              | 1.85<br>$\pm 1.32$       | 3.34<br>$\pm 1.22$   | 0.22<br>$\pm 0.07$ | 0<br>$\pm 0$        | 0.23<br>$\pm 0.07$  | 1.67<br>$\pm 0.35$   | 0.03<br>$\pm 0.01$  | 0.16<br>$\pm 0.09$ |
| <i>Phvul.006G036400</i> | PPR repeat (PPR) /DYW family of nucleic acid deaminases  | 0.54<br>$\pm 0.46$       | 0.97<br>$\pm 0.15$   | 0.18<br>$\pm 0.03$ | 0.35<br>$\pm 0.04$  | 0.09<br>$\pm 0.02$  | 1.13<br>$\pm 0.17$   | 0.29<br>$\pm 0.02$  | 0.3<br>$\pm 0.09$  |
| <i>Phvul.007G093600</i> | MLO-like protein 12-related                              | 40.43<br>$\pm 28.57$     | 98.75<br>$\pm 9.36$  | 7.09<br>$\pm 1.42$ | 29.97<br>$\pm 8.76$ | 10.04<br>$\pm 0.54$ | 107.29<br>$\pm 2.22$ | 10.96<br>$\pm 2.32$ | 19.69<br>$\pm 5.5$ |
| <i>Phvul.007G125500</i> | Potato inhibitor I family                                | 1.94<br>$\pm 1.94$       | 5.7<br>$\pm 0.98$    | 5.74<br>$\pm 1.54$ | 2.48<br>$\pm 0.94$  | 0<br>$\pm 0$        | 6.01<br>$\pm 0.27$   | 5.77<br>$\pm 2.23$  | 6.06<br>$\pm 2.6$  |
| <i>Phvul.007G161300</i> | PPR repeat (PPR) // PPR repeat family (PPR_2)            | 0.87<br>$\pm 0.7$        | 1.09<br>$\pm 0.59$   | 0.39<br>$\pm 0.03$ | 0.63<br>$\pm 0.06$  | 0.22<br>$\pm 0.08$  | 1.71<br>$\pm 0.01$   | 0.47<br>$\pm 0.16$  | 0.57<br>$\pm 0.05$ |
| <i>Phvul.007G169400</i> | No functional annotation                                 | 8.21<br>$\pm 6.19$       | 13.04<br>$\pm 6.55$  | 5.07<br>$\pm 0.31$ | 7.92<br>$\pm 0.62$  | 1.27<br>$\pm 0.3$   | 20.88<br>$\pm 4.23$  | 5.91<br>$\pm 1.35$  | 6.75<br>$\pm 1.26$ |
| <i>Phvul.007G216700</i> | No functional annotation                                 | 16.46<br>$\pm 15.17$     | 26.93<br>$\pm 13.87$ | 0.16<br>$\pm 0.08$ | 0.03<br>$\pm 0.03$  | 3.38<br>$\pm 1.11$  | 39.89<br>$\pm 5.24$  | 0.11<br>$\pm 0.06$  | 0.04<br>$\pm 0.04$ |
| <i>Phvul.007G278100</i> | Chlorophyllase                                           | 27.09<br>$\pm 23.72$     | 57.23<br>$\pm 28.8$  | 3.33<br>$\pm 0.57$ | 3.46<br>$\pm 0.4$   | 4.32<br>$\pm 0.35$  | 84.81<br>$\pm 3.71$  | 4.39<br>$\pm 0.51$  | 2.97<br>$\pm 0.39$ |
| <i>Phvul.008G025900</i> | PPR repeat (PPR) / DYW family of nucleic acid deaminases | 4.5<br>$\pm 4$           | 9.64<br>$\pm 4.88$   | 0.62<br>$\pm 0.05$ | 0.72<br>$\pm 0.03$  | 0.45<br>$\pm 0.13$  | 13.46<br>$\pm 0.95$  | 0.65<br>$\pm 0.13$  | 0.94<br>$\pm 0.09$ |

Table S14 continued

| Gene ID                 | Gene Annotation                                                     | Transcript levels (FPKM) |                |               |               |                 |                |               |               |
|-------------------------|---------------------------------------------------------------------|--------------------------|----------------|---------------|---------------|-----------------|----------------|---------------|---------------|
|                         |                                                                     | Mock inoculation         |                |               |               | Xap inoculation |                |               |               |
|                         |                                                                     | 0 h PI                   | 8 h PI         | 24 h PI       | 48 h PI       | 0 h PI          | 8 h PI         | 24 h PI       | 48 h PI       |
| <i>Phvul.008G046100</i> | PPR repeat (PPR) // PPR repeat (PPR_1) // PPR repeat family (PPR_2) | 1.05<br>±0.76            | 1.73<br>±0.88  | 0.71<br>±0.04 | 1.12<br>±0.19 | 0.24<br>±0.07   | 2.68<br>±0.28  | 0.89<br>±0.3  | 0.72<br>±0.17 |
| <i>Phvul.008G103900</i> | Cis-zeatin O-glucosyltransferase                                    | 0.84<br>±0.7             | 1.07<br>±0.55  | 0.15<br>±0.03 | 0.1<br>±0.03  | 0.06<br>±0.02   | 1.8<br>±0.41   | 0.11<br>±0.03 | 0.13<br>±0.06 |
| <i>Phvul.008G105000</i> | Mitochondrial inner membrane protease subunit 2                     | 2.67<br>±1.4             | 3.87<br>±1.95  | 1.25<br>±0.35 | 2.42<br>±0.32 | 0.54<br>±0.16   | 6.02<br>±0.91  | 1.83<br>±0.4  | 1.82<br>±0.49 |
| <i>Phvul.008G201000</i> | No functional annotation                                            | 0.9<br>±0.26             | 0.15<br>±0.15  | 0.24<br>±0.12 | 0.38<br>±0.19 | 0 ±0            | 0.26<br>±0.15  | 0.45<br>±0.14 | 0.3<br>±0.17  |
| <i>Phvul.008G279800</i> | X-box transcription factor-related                                  | 12.28<br>±9.2            | 23.37<br>±11.8 | 4.37<br>±0.32 | 5.16<br>±0.47 | 2.58<br>±0.39   | 38.63<br>±2.42 | 6.81<br>±1.62 | 4.25<br>±0.32 |
| <i>Phvul.009G004200</i> | B-box zinc finger                                                   | 1.16<br>±1.02            | 2.37<br>±1.22  | 0.02<br>±0.02 | 0.02<br>±0.02 | 0<br>±0         | 4.36<br>±0.65  | 0<br>±0       | 0<br>±0       |
| <i>Phvul.009G081600</i> | No functional annotation                                            | 1.07<br>±0.82            | 1.6<br>±0.83   | 0.24<br>±0.12 | 0<br>±0       | 0.16<br>±0.08   | 2.35<br>±0.09  | 0.08<br>±0.02 | 0.23<br>±0.1  |
| <i>Phvul.009G159500</i> | PPR repeat (PPR) / DYW family of nucleic acid deaminases            | 0.85<br>±0.5             | 1.36<br>±0.69  | 0.37<br>±0.1  | 0.6<br>±0.03  | 0.19<br>±0.03   | 1.66<br>±0.15  | 0.51<br>±0.19 | 0.65<br>±0.11 |
| <i>Phvul.009G169000</i> | Coproporphyrinogen dehydrogenase                                    | 3.46<br>±2.89            | 7<br>±3.56     | 0.74<br>±0.13 | 1.35<br>±0.24 | 0.58<br>±0.09   | 10.32<br>±1.08 | 0.93<br>±0.16 | 0.84<br>±0.21 |
| <i>Phvul.010G077634</i> | SCY1-like protein 1                                                 | 11.07<br>±8.8            | 19.06<br>±9.69 | 2.67<br>±0.39 | 2.23<br>±0.23 | 2.18<br>±0.16   | 29.56<br>±0.83 | 2.79<br>±0.29 | 2.34<br>±0.42 |
| <i>Phvul.010G093200</i> | PPR repeat (PPR) // PPR repeat (PPR_1) // PPR repeat family (PPR_2) | 0.71<br>±0.44            | 1.05<br>±0.53  | 0.35<br>±0.12 | 0.5<br>±0.09  | 0.14<br>±0.05   | 1.47<br>±0.06  | 0.34<br>±0.13 | 0.44<br>±0.12 |
| <i>Phvul.010G102700</i> | Domain of unknown function                                          | 5.13<br>±4.51            | 10.01<br>±5.06 | 0.35<br>±0.09 | 1.21<br>±0.27 | 0.76<br>±0.23   | 14.42<br>±0.24 | 0.88<br>±0.18 | 0.67<br>±0.06 |
| <i>Phvul.010G159900</i> | Complement component 1                                              | 1.71<br>±0.47            | 1.57<br>±0.79  | 1.61<br>±0.13 | 2.86<br>±0.12 | 0.38<br>±0.14   | 2.71<br>±0.31  | 2.24<br>±0.63 | 2.56<br>±0.23 |

Table S14 continued

| Gene ID                 | Gene Annotation                                                                   | Transcript levels (FPKM) |                 |               |               |                 |                |               |               |
|-------------------------|-----------------------------------------------------------------------------------|--------------------------|-----------------|---------------|---------------|-----------------|----------------|---------------|---------------|
|                         |                                                                                   | Mock inoculation         |                 |               |               | Xap inoculation |                |               |               |
|                         |                                                                                   | 0 h PI                   | 8 h PI          | 24 h PI       | 48 h PI       | 0 h PI          | 8 h PI         | 24 h PI       | 48 h PI       |
| <i>Phvul.011G006400</i> | PPR repeat (PPR) // PPR repeat (PPR_1) // Pentatricopeptide repeat domain (PPR_3) | 0.76<br>±0.61            | 1.22<br>±0.63   | 0.35<br>±0.1  | 0.3<br>±0.09  | 0.09<br>±0.05   | 1.89<br>±0.47  | 0.43<br>±0.17 | 0.31<br>±0.16 |
| <i>Phvul.011G033200</i> | Uncharacterized conserved protein                                                 | 17.33<br>±14.86          | 31.63<br>±15.82 | 2.14<br>±0.33 | 3.34<br>±0.43 | 3.89<br>±0.36   | 50.7<br>±2.9   | 2.49<br>±0.5  | 2.87<br>±0.54 |
| <i>Phvul.011G060800</i> | PPR repeat (PPR) // Pentatricopeptide repeat domain (PPR_3)                       | 4.09<br>±3.06            | 6.84<br>±3.45   | 0.81<br>±0.14 | 1.69<br>±0.33 | 0.74<br>±0.14   | 11.46<br>±2.01 | 1.29<br>±0.63 | 1.8<br>±0.37  |
| <i>Phvul.011G096800</i> | (+)-Borneol dehydrogenase                                                         | 6.71<br>±6.67            | 14.44<br>±7.22  | 0.06<br>±0.03 | 0.24<br>±0.14 | 0<br>±0         | 26.75<br>±6.91 | 0.38<br>±0.38 | 0.04<br>±0.04 |
| XLOC_012819             | No functional annotation                                                          | 1.01<br>±0.25            | 1.85<br>±1.09   | 0.65<br>±0.07 | 2.14<br>±1.07 | 0<br>±0         | 1.63<br>±0.96  | 0.68<br>±0.39 | 0.72<br>±0.46 |
| XLOC_012875             | No functional annotation                                                          | 2.38<br>±1.9             | 3.95<br>±0.7    | 2.25<br>±0.93 | 2.51<br>±0.06 | 0.17<br>±0.08   | 2.93<br>±0.66  | 2.66<br>±1.19 | 2.6<br>±0.38  |
| XLOC_022362             | No functional annotation                                                          | 1.08<br>±0.37            | 1.1<br>±0.55    | 0.39<br>±0.06 | 0.35<br>±0.14 | 0.12<br>±0.04   | 2.49<br>±0.26  | 0.61<br>±0.02 | 0.42<br>±0.17 |
| XLOC_027366             | No functional annotation                                                          | 1.5<br>±1.5              | 2.44<br>±1.28   | 0<br>±0       | 0<br>±0       | 0<br>±0         | 4.6<br>±1.28   | 0<br>±0       | 0<br>±0       |



**Table S15. Transcript abundance for genes downregulated in the CBB-susceptible RIL at 8 h post-inoculation (PI) with *Xanthomonas axonopodis* (Xap).** Transcript levels for individual genes corresponding to each RIL/ inoculation treatment/ sampling time PI are represented as FPKM  $\pm$  SE of three experimental replicates.

|                                                      |                          | Transcript levels (FPKM) |                    |                    |                    |                    |              |                    |                    |
|------------------------------------------------------|--------------------------|--------------------------|--------------------|--------------------|--------------------|--------------------|--------------|--------------------|--------------------|
|                                                      |                          | Mock inoculation         |                    |                    |                    | Xap inoculation    |              |                    |                    |
| Gene ID                                              | Gene Annotation          | 0 h PI                   | 8 h PI             | 24 h PI            | 48 h PI            | 0 h PI             | 8 h PI       | 24 h PI            | 48 h PI            |
| <i>Phvul.005G026900</i> ,<br><i>Phvul.005G026966</i> | No functional annotation | 0<br>$\pm 0$             | 0.69<br>$\pm 0.25$ | 0<br>$\pm 0$       | 0.23<br>$\pm 0.12$ | 0<br>$\pm 0$       | 0<br>$\pm 0$ | 0.25<br>$\pm 0.13$ | 0.72<br>$\pm 0.39$ |
| <i>Phvul.005G038300</i>                              | No functional annotation | 2.33<br>$\pm 1.57$       | 0.76<br>$\pm 0.14$ | 0.63<br>$\pm 0.63$ | 1.26<br>$\pm 0.63$ | 1.21<br>$\pm 0.61$ | 0<br>$\pm 0$ | 0.69<br>$\pm 0.37$ | 0.46<br>$\pm 0.46$ |
| <i>Phvul.005G071400</i>                              | $\gamma$ -Thionin family | 0.15<br>$\pm 0.15$       | 0.84<br>$\pm 0.46$ | 0<br>$\pm 0$       | 0.22<br>$\pm 0.14$ | 0.16<br>$\pm 0.08$ | 0<br>$\pm 0$ | 0.05<br>$\pm 0.05$ | 0.3<br>$\pm 0.22$  |

**Table S16. Transcript abundance for genes downregulated in the CBB-susceptible RIL at 24 h post-inoculation (PI) with *Xanthomonas axonopodis* (Xap).** Transcript levels for individual genes corresponding to each RIL/ inoculation treatment/ sampling time PI are represented as FPKM  $\pm$  SE of three experimental replicates.

|                         |                                  | Transcript levels (FPKM) |                    |                    |                    |                    |                    |                    |                    |
|-------------------------|----------------------------------|--------------------------|--------------------|--------------------|--------------------|--------------------|--------------------|--------------------|--------------------|
|                         |                                  | Mock inoculation         |                    |                    |                    | Xap inoculation    |                    |                    |                    |
| Gene ID                 | Gene Annotation                  | 0 h PI                   | 8 h PI             | 24 h PI            | 48 h PI            | 0 h PI             | 8 h PI             | 24 h PI            | 48 h PI            |
| <i>Phvul.006G070100</i> | RING-H2 finger protein           | 0.18                     | 0                  | 0.76               | 0.63               | 0.34               | 0.21               | 0                  | 0.73               |
|                         | ATL66                            | $\pm 0.1$                | $\pm 0$            | $\pm 0.47$         | $\pm 0.21$         | $\pm 0.19$         | $\pm 0.12$         | $\pm 0$            | $\pm 0.3$          |
| <i>Phvul.008G028100</i> | Hyoscyamine (6S)-<br>dioxygenase | 0.11<br>$\pm 0.08$       | 0.02<br>$\pm 0.02$ | 1.32<br>$\pm 0.26$ | 0.58<br>$\pm 0.11$ | 0.19<br>$\pm 0.12$ | 0.17<br>$\pm 0.09$ | 0.28<br>$\pm 0.16$ | 0.82<br>$\pm 0.12$ |

**Table S17. Transcript abundance for genes downregulated in the CBB-susceptible RIL at 48 h post-inoculation (PI) with *Xanthomonas axonopodis* (Xap).** Transcript levels for individual genes corresponding to each RIL/ inoculation treatment/ sampling time PI are represented as FPKM  $\pm$  SE of three experimental replicates.

| Gene ID                 | Gene Annotation                                                                                             | Transcript levels (FPKM) |                    |                    |                    |                    |                    |                    |                    |
|-------------------------|-------------------------------------------------------------------------------------------------------------|--------------------------|--------------------|--------------------|--------------------|--------------------|--------------------|--------------------|--------------------|
|                         |                                                                                                             | Mock inoculation         |                    |                    |                    | Xap inoculation    |                    |                    |                    |
|                         |                                                                                                             | 0 h PI                   | 8 h PI             | 24 h PI            | 48 h PI            | 0 h PI             | 8 h PI             | 24 h PI            | 48 h PI            |
| <i>Phvul.001G246300</i> | Absciscic acid receptor PYL5                                                                                | 0.02<br>$\pm 0.02$       | 0.27<br>$\pm 0.27$ | 0.83<br>$\pm 0.39$ | 2.15<br>$\pm 2.01$ | 0<br>$\pm 0$       | 0.14<br>$\pm 0.05$ | 2.12<br>$\pm 1.55$ | 0.3<br>$\pm 0.12$  |
| <i>Phvul.003G030000</i> | Protein kinase-like protein                                                                                 | 2.29<br>$\pm 0.91$       | 0.56<br>$\pm 0.06$ | 1.02<br>$\pm 0.1$  | 8.16<br>$\pm 3.2$  | 1.35<br>$\pm 0.12$ | 0.63<br>$\pm 0.12$ | 1.81<br>$\pm 0.51$ | 2<br>$\pm 0.73$    |
| <i>Phvul.006G001500</i> | Leucine Rich Repeat (LRR_1) / Leucine rich repeat N-terminal domain (LRRNT_2) / Leucine rich repeat (LRR_8) | 2.14<br>$\pm 0.87$       | 0.86<br>$\pm 0.2$  | 0.74<br>$\pm 0.03$ | 4.48<br>$\pm 2.45$ | 1.81<br>$\pm 0.1$  | 0.86<br>$\pm 0.03$ | 0.85<br>$\pm 0.18$ | 1.1<br>$\pm 0.55$  |
| <i>Phvul.006G151500</i> | Glucose-6-phosphate/phosphate translocator 1, chloroplastic-related                                         | 0.57<br>$\pm 0.24$       | 0.48<br>$\pm 0.26$ | 0.64<br>$\pm 0.06$ | 5.74<br>$\pm 4.98$ | 1.62<br>$\pm 0.46$ | 0.36<br>$\pm 0.08$ | 0.59<br>$\pm 0.14$ | 1.13<br>$\pm 0.47$ |
| <i>Phvul.007G049900</i> | Cysteine-rich receptor-like protein kinase 28-related                                                       | 0.44<br>$\pm 0.06$       | 0.3<br>$\pm 0.06$  | 0.12<br>$\pm 0.04$ | 1.53<br>$\pm 0.94$ | 0.3<br>$\pm 0.08$  | 0.2<br>$\pm 0.08$  | 0.23<br>$\pm 0.1$  | 0.26<br>$\pm 0.06$ |
| <i>Phvul.009G133500</i> | Expressed protein                                                                                           | 6.4<br>$\pm 2.13$        | 4.3<br>$\pm 2.19$  | 1.48<br>$\pm 0.2$  | 12.9<br>$\pm 6.97$ | 2.25<br>$\pm 0.48$ | 5.3<br>$\pm 0.45$  | 2.49<br>$\pm 1.52$ | 2.53<br>$\pm 1.18$ |
| XLOC_020687             | No functional annotation                                                                                    | 0.26<br>$\pm 0.2$        | 0.1<br>$\pm 0.1$   | 0.03<br>$\pm 0.03$ | 0.61<br>$\pm 0.61$ | 0.02<br>$\pm 0.02$ | 0.01<br>$\pm 0.01$ | 0<br>$\pm 0$       | 0<br>$\pm 0$       |

**Table S18. Transcript abundance for genes downregulated in the CBB-resistant RIL and the CBB-susceptible RIL at 0 h post-inoculation (PI) with *Xanthomonas axonopodis* (Xap).** Transcript levels for individual genes corresponding to each RIL/treatment/sampling time PI are represented as FPKM  $\pm$  SE of three experimental replicates.

|                   |                                                                       | Transcript levels (FPKM) |                    |                 |                  |                 |                    |                |                 |
|-------------------|-----------------------------------------------------------------------|--------------------------|--------------------|-----------------|------------------|-----------------|--------------------|----------------|-----------------|
|                   |                                                                       | Mock inoculation         |                    |                 |                  | Xap inoculation |                    |                |                 |
| Gene ID           | Gene Annotation                                                       | 0 h PI                   | 8 h PI             | 24 h PI         | 48 h PI          | 0 h PI          | 8 h PI             | 24 h PI        | 48 h PI         |
| CBB-resistant RIL |                                                                       |                          |                    |                 |                  |                 |                    |                |                 |
| Phvul.001G085200  | A. thaliana mRNA (ORF19) from chromosome 3                            | 673.81<br>±649.02        | 1421.87<br>±692.45 | 50.54<br>±7.56  | 102.02<br>±31.39 | 25.22<br>±3.08  | 1127.76<br>±565.04 | 89.94<br>±7.03 | 76.61<br>±34.87 |
| Phvul.001G220100  | Cathepsin B / Cathepsin B1                                            | 38.09<br>±30.52          | 72.69<br>±32.65    | 8.44<br>±0.7    | 11.63<br>±1.79   | 7.81<br>±0.54   | 64.64<br>±29.19    | 10.46<br>±0.36 | 14.33<br>±1.88  |
| Phvul.001G226300  | DnaJ homolog subfamily C member                                       | 35.58<br>±34.81          | 67.28<br>±32.78    | 1.72<br>±0.07   | 2.06<br>±0.2     | 1<br>±0.16      | 62.46<br>±30.26    | 1.99<br>±0.2   | 1.97<br>±0.1    |
| Phvul.001G242900  | Protein early flowering 4                                             | 129.46<br>±127.77        | 197.2<br>±103.54   | 2.89<br>±0.8    | 2.92<br>±0.65    | 3.13<br>±0.16   | 255.71<br>±130.32  | 3.07<br>±0.18  | 5.29<br>±0.5    |
| Phvul.002G018400  | CGI-141-related/lipase containing protein                             | 17.92<br>±14.52          | 30.68<br>±14.25    | 2.79<br>±0.1    | 2.49<br>±0.33    | 3.23<br>±0.11   | 33.13<br>±15.32    | 2.75<br>±0.51  | 4.05<br>±0.96   |
| Phvul.002G060000  | F5O11.5                                                               | 1.6<br>±1.26             | 3.46<br>±1.2       | 0.62<br>±0.09   | 1.02<br>±0.06    | 0.28<br>±0.17   | 3.07<br>±0.98      | 0.88<br>±0.06  | 0.8<br>±0.17    |
| Phvul.002G084700  | PPR repeat (PPR) / DYW family of nucleic acid deaminases              | 1.25<br>±0.98            | 1.97<br>±0.99      | 0.49<br>±0.08   | 0.7<br>±0.17     | 0.3<br>±0.03    | 2.44<br>±0.89      | 0.78<br>±0.18  | 0.75<br>±0.03   |
| Phvul.002G093000  | DnaJ homolog subfamily C member                                       | 11.35<br>±10.95          | 24.98<br>±12.45    | 0.27<br>±0.14   | 0.42<br>±0.06    | 1.11<br>±0.36   | 25.82<br>±12.51    | 0.26<br>±0.04  | 0.46<br>±0.15   |
| Phvul.002G096000  | Phosphoglucosyltransferase (α-D-glucose-1,6-bisphosphate-dependent) / | 51.69<br>±47.49          | 106.02<br>±50.3    | 3.51<br>±1.21   | 2.7<br>±0.66     | 5.14<br>±1.47   | 92.61<br>±43.17    | 4.52<br>±0.29  | 1.96<br>±0.79   |
| Phvul.002G110800  | Histone H1                                                            | 54.71<br>±36.73          | 96.22<br>±40.15    | 44.42<br>±12.82 | 75.18<br>±8.01   | 13.22<br>±2.49  | 72.9<br>±27.52     | 54.05<br>±6.75 | 66.25<br>±0.73  |

Table S18 continued

| Gene ID                                              | Gene Annotation                                                                           | Transcript levels (FPKM) |                   |               |                |                 |                  |                |                |
|------------------------------------------------------|-------------------------------------------------------------------------------------------|--------------------------|-------------------|---------------|----------------|-----------------|------------------|----------------|----------------|
|                                                      |                                                                                           | Mock inoculation         |                   |               |                | Xap inoculation |                  |                |                |
|                                                      |                                                                                           | 0 h PI                   | 8 h PI            | 24 h PI       | 48 h PI        | 0 h PI          | 8 h PI           | 24 h PI        | 48 h PI        |
| <i>Phvul.002G111900</i>                              | Ferulate-5-hydroxylase                                                                    | 6.47<br>±5.44            | 10.98<br>±4.94    | 2.43<br>±0.27 | 2.72<br>±0.43  | 1.16<br>±0.23   | 10.15<br>±4.24   | 3.11<br>±0.42  | 3.21<br>±0.74  |
| <i>Phvul.002G120500</i>                              | Pentatricopeptide repeat-containing protein                                               | 3.3<br>±3.04             | 4.93<br>±2.51     | 0.98<br>±0.2  | 1.63<br>±0.54  | 0.45<br>±0.05   | 4.87<br>±2.48    | 1.18<br>±0.14  | 2.11<br>±0.5   |
| <i>Phvul.002G213300</i>                              | Nicotinamidase                                                                            | 25.61<br>±22.74          | 50.22<br>±24.07   | 5.53<br>±0.87 | 12.77<br>±3.23 | 2.87<br>±0.59   | 38.29<br>±17.51  | 10.34<br>±1.3  | 14.05<br>±4.65 |
| <i>Phvul.002G234400</i>                              | Bifunctional inhibitor/lipid-transfer protein/seed storage 2S albumin superfamily protein | 22.73<br>±19.38          | 45.78<br>±21.63   | 5.09<br>±0.89 | 5.31<br>±0.48  | 4.8<br>±0.55    | 44.88<br>±20.41  | 6.37<br>±1.03  | 9.32<br>±1.41  |
| <i>Phvul.002G263100</i>                              | No functional annotation                                                                  | 22.45<br>±21.56          | 59.19<br>±29.5    | 1.22<br>±0.55 | 2.14<br>±0.96  | 1.82<br>±0.8    | 56.76<br>±29.67  | 1.26<br>±0.18  | 1.04<br>±0.32  |
| <i>Phvul.002G309600</i>                              | NADP-dependent malic enzyme 1                                                             | 38.45<br>±30.51          | 68.07<br>±29.46   | 3.79<br>±0.2  | 3.8<br>±0.32   | 7.35<br>±0.61   | 66.17<br>±28.94  | 4.03<br>±0.05  | 5.45<br>±0.91  |
| <i>Phvul.002G314000</i> ,<br><i>Phvul.002G314100</i> | Aldehyde dehydrogenase (NAD(P) <sup>(+)</sup> )                                           | 21.06<br>±16.07          | 30.24<br>±11.82   | 6.98<br>±1.49 | 12.96<br>±2.09 | 4.39<br>±1.17   | 27.98<br>±11.11  | 10.36<br>±0.42 | 20.64<br>±3.49 |
| <i>Phvul.002G321800</i>                              | Flavin-binding Kelch repeat F-box protein 1 (FKF1)                                        | 15.55<br>±15.12          | 33.39<br>±16.58   | 0.31<br>±0.09 | 0.43<br>±0.12  | 0.55<br>±0.08   | 28.49<br>±14.03  | 0.26<br>±0.03  | 0.35<br>±0.05  |
| <i>Phvul.002G326700</i>                              | Multidrug resistance protein                                                              | 36.15<br>±33.95          | 70.22<br>±34.17   | 1.4<br>±0.07  | 0.81<br>±0.31  | 2.62<br>±0.7    | 66.33<br>±32.06  | 1.69<br>±0.17  | 1.08<br>±0.18  |
| <i>Phvul.003G004300</i>                              | Molecular chaperone (DnaJ superfamily)                                                    | 155.73<br>±154.2         | 300.71<br>±151.93 | 0.57<br>±0.25 | 0.56<br>±0.08  | 1.04<br>±0.25   | 292.06<br>±145.9 | 0.51<br>±0.05  | 0.62<br>±0.12  |
| <i>Phvul.003G022000</i>                              | Clathrin assembly protein                                                                 | 11.24<br>±9.98           | 21.32<br>±10.28   | 1.34<br>±0.18 | 1.56<br>±0.24  | 1.2<br>±0.24    | 21<br>±9.95      | 1.59<br>±0.13  | 3.83<br>±0.33  |

Table S18 continued

| Gene ID                 | Gene Annotation                                  | Transcript levels (FPKM) |                   |               |               |                        |                   |               |               |
|-------------------------|--------------------------------------------------|--------------------------|-------------------|---------------|---------------|------------------------|-------------------|---------------|---------------|
|                         |                                                  | Mock inoculation         |                   |               |               | <i>Xap</i> inoculation |                   |               |               |
|                         |                                                  | 0 h PI                   | 8 h PI            | 24 h PI       | 48 h PI       | 0 h PI                 | 8 h PI            | 24 h PI       | 48 h PI       |
| <i>Phvul.003G044600</i> | Glutamate formimidoyltransferase                 | 5.56<br>±4.72            | 10.78<br>±4.86    | 0.43<br>±0.1  | 0.52<br>±0.04 | 0.83<br>±0.14          | 9.2<br>±4.27      | 0.55<br>±0.2  | 1.32<br>±0.55 |
| <i>Phvul.003G124400</i> | Genomic DNA, chromosome 3, P1 clone: MKP6        | 6.95<br>±3.91            | 13.64<br>±3.91    | 2.45<br>±0.21 | 3.94<br>±0.61 | 1.19<br>±0.46          | 10.09<br>±4.73    | 3.87<br>±1.01 | 5.04<br>±1.56 |
| <i>Phvul.003G131400</i> | Germin-like protein subfamily 3                  | 99.16<br>±73.9           | 170.39<br>±71.85  | 0.63<br>±0.22 | 0.35<br>±0.08 | 22.87<br>±4.83         | 222.61<br>±104.5  | 0.41<br>±0.13 | 0.17<br>±0.1  |
| <i>Phvul.003G142200</i> | Delta(4)-3-oxosteroid 5-β-reductase              | 10.54<br>±8.09           | 11.41<br>±5.17    | 1.06<br>±0.61 | 0.72<br>±0.46 | 2.52<br>±0.16          | 13.57<br>±6.2     | 0.76<br>±0.18 | 0.23<br>±0.17 |
| <i>Phvul.003G148400</i> | Allergen V5/TPX-1-related family protein-related | 23.87<br>±20.45          | 47.11<br>±21.25   | 2.29<br>±0.15 | 2.19<br>±0.63 | 3.26<br>±0.52          | 39.94<br>±20.03   | 4.28<br>±0.82 | 1.29<br>±0.25 |
| <i>Phvul.003G198500</i> | RNA-dependent RNA polymerase 2                   | 1.54<br>±1.22            | 2.64<br>±1.06     | 0.8<br>±0.02  | 0.69<br>±0.14 | 0.34<br>±0.03          | 2.03<br>±0.79     | 0.68<br>±0.04 | 0.81<br>±0.06 |
| <i>Phvul.003G209600</i> | β-Lactamase / Penicillinase                      | 14.18<br>±11.8           | 24.69<br>±11.56   | 2.38<br>±0.48 | 2.44<br>±0.4  | 3.14<br>±0.35          | 24.46<br>±10.62   | 2.91<br>±0.35 | 2.54<br>±0.15 |
| <i>Phvul.003G249200</i> | No functional annotation                         | 4.39<br>±3.43            | 8.39<br>±3.65     | 2.02<br>±0.18 | 2.15<br>±0.5  | 0.92<br>±0.22          | 7.58<br>±3.01     | 2.14<br>±0.2  | 2.38<br>±0.49 |
| <i>Phvul.003G295900</i> | No functional annotation                         | 17.81 ±<br>116.61        | 266.35<br>±133    | 1.88<br>±0.23 | 3.69<br>±1.03 | 1.73<br>±0.19          | 224.45<br>±116.72 | 2.91<br>±0.94 | 2.76<br>±1    |
| <i>Phvul.004G079500</i> | NDH-dependent cyclic electron flow 5             | 79.39<br>±78.23          | 165.6<br>±81.94   | 1.85<br>±0.36 | 1.69<br>±0.33 | 2.66<br>±0.75          | 151.29<br>±73.91  | 1.94<br>±0.2  | 1.12<br>±0.23 |
| <i>Phvul.004G082300</i> | Tyrosine-specific transport protein              | 11.46<br>±9.73           | 22.22<br>±9.87    | 1.22<br>±0.13 | 1.42<br>±0.31 | 2.61<br>±0.51          | 20.69<br>±9.15    | 1.31<br>±0.16 | 0.97<br>±0.18 |
| <i>Phvul.004G088300</i> | Gigantea                                         | 23.93<br>±23.16          | 47.96<br>±23.68   | 0.67<br>±0.12 | 0.74<br>±0.13 | 0.67<br>±0.12          | 43.8<br>±21.39    | 0.59<br>±0.06 | 0.61<br>±0.09 |
| <i>Phvul.004G106700</i> | Protein of unknown function                      | 171.12<br>±161.43        | 346.79<br>±168.52 | 2.44<br>±0.42 | 2.47<br>±0.59 | 11.26<br>±2.33         | 328.87<br>±158.55 | 2.72<br>±0.28 | 1.78<br>±0.51 |

Table S18 continued

| Gene ID                 | Gene Annotation                                                                | Transcript levels (FPKM) |                   |               |               |                 |                   |               |               |
|-------------------------|--------------------------------------------------------------------------------|--------------------------|-------------------|---------------|---------------|-----------------|-------------------|---------------|---------------|
|                         |                                                                                | Mock inoculation         |                   |               |               | Xap inoculation |                   |               |               |
|                         |                                                                                | 0 h PI                   | 8 h PI            | 24 h PI       | 48 h PI       | 0 h PI          | 8 h PI            | 24 h PI       | 48 h PI       |
| <i>Phvul.004G114700</i> | Leucine Rich Repeat (LRR_1) // Leucine rich repeat N-terminal domain (LRRNT_2) | 1.92<br>±1.77            | 4.08<br>±1.98     | 0.12<br>±0.02 | 0.36<br>±0.16 | 0.18<br>±0.04   | 4.03<br>±1.97     | 0.19<br>±0.07 | 1.06<br>±0.28 |
| <i>Phvul.004G119400</i> | No functional annotation                                                       | 5.11<br>±5.11            | 6.71<br>±3.87     | 0.06<br>±0.06 | 0.03<br>±0.03 | 0<br>±0         | 7.63<br>±4        | 0<br>±0       | 0.03<br>±0.03 |
| <i>Phvul.004G133000</i> | Member of 'GDYG' family of lipolytic enzymes                                   | 5.21<br>±4.28            | 9.2<br>±4.02      | 0.5<br>±0.06  | 0.82<br>±0.3  | 0.63<br>±0.06   | 8.65<br>±3.94     | 0.5<br>±0.11  | 0.37<br>±0.09 |
| <i>Phvul.005G032700</i> | Dirigent protein 20-related                                                    | 4.95<br>±4.02            | 6.82<br>±3.51     | 4.28<br>±0.99 | 2.44<br>±1.24 | 0.88<br>±0.41   | 6.83<br>±2.72     | 4.83<br>±0.65 | 2.5<br>±0.5   |
| <i>Phvul.005G104600</i> | Expansin-B1-related                                                            | 19.78<br>±12.81          | 30.7<br>±11.32    | 1.64<br>±0.81 | 0.83<br>±0.21 | 4.88<br>±0.44   | 30.78<br>±13.32   | 1.27<br>±0.29 | 0.43<br>±0.13 |
| <i>Phvul.005G174000</i> | ATP:ADP antiporter, AAA family                                                 | 75.56<br>±68.63          | 148.25<br>±69.69  | 4.85<br>±0.7  | 9.78<br>±4.25 | 8.3<br>±0.88    | 151.45<br>±71.25  | 6.78<br>±1.08 | 5.7<br>±2.98  |
| <i>Phvul.006G063800</i> | No functional annotation                                                       | 127.94<br>±127.13        | 259.59<br>±130.39 | 0.38<br>±0.05 | 0.5<br>±0.02  | 0.81<br>±0.23   | 243.41<br>±121.35 | 0.67<br>±0.2  | 0.46<br>±0.08 |
| <i>Phvul.006G064100</i> | α-Glucan phosphorylase 2, cytosolic                                            | 63.6<br>±58.48           | 130.93<br>±62.67  | 4.14<br>±0.18 | 4.04<br>±0.31 | 5.38<br>±0.32   | 124.56<br>±59.83  | 4.41<br>±0.11 | 3.42<br>±0.16 |
| <i>Phvul.006G065300</i> | Phosphomethyl-pyrimidine synthase                                              | 420.23<br>±409.6         | 791.06<br>±401.32 | 8.43<br>±1.11 | 7.22<br>±0.52 | 11.08<br>±1.84  | 735.82<br>±363.26 | 9.17<br>±0.79 | 5.64<br>±0.85 |
| <i>Phvul.006G067600</i> | Ring finger protein 41, 151                                                    | 6.45<br>±4.79            | 12.46<br>±5.42    | 2.38<br>±0.77 | 3.97<br>±0.85 | 1.6<br>±0.12    | 10.3<br>±4.77     | 3.14<br>±0.62 | 3.39<br>±1.3  |
| <i>Phvul.006G117800</i> | Pre-mRNA 3'-end-processing factor FIP1                                         | 0.85<br>±0.8             | 1.4<br>±0.66      | 0.26<br>±0.03 | 0.29<br>±0.02 | 0.2<br>±0.06    | 1.19<br>±0.5      | 0.34<br>±0.04 | 0.39<br>±0.12 |
| <i>Phvul.006G146300</i> | Chaperonin-like RBCX protein                                                   | 74.85<br>±73.93          | 157.04<br>±78.76  | 0.09<br>±0.05 | 0<br>±0       | 0.5<br>±0.2     | 134.64<br>±67.26  | 0.26<br>±0.11 | 0.14<br>±0.08 |

Table S18 continued

| Gene ID                                              | Gene Annotation                                     | Transcript levels (FPKM) |                         |                       |                       |                      |                         |                       |                        |
|------------------------------------------------------|-----------------------------------------------------|--------------------------|-------------------------|-----------------------|-----------------------|----------------------|-------------------------|-----------------------|------------------------|
|                                                      |                                                     | Mock inoculation         |                         |                       |                       | Xap inoculation      |                         |                       |                        |
|                                                      |                                                     | 0 h PI                   | 8 h PI                  | 24 h PI               | 48 h PI               | 0 h PI               | 8 h PI                  | 24 h PI               | 48 h PI                |
| <i>Phvul.006G151300</i> ,<br><i>Phvul.006G151400</i> | $\beta$ -Glucosidase 45-related                     | 2.2<br>$\pm 1.96$        | 3.76<br>$\pm 1.71$      | 0.77<br>$\pm 0.23$    | 0.98<br>$\pm 0.08$    | 0.31<br>$\pm 0.08$   | 3.72<br>$\pm 1.62$      | 0.86<br>$\pm 0.09$    | 1.5<br>$\pm 0.11$      |
| <i>Phvul.006G168800</i>                              | Proprotein convertase subtilisin/Kexin              | 2.32<br>$\pm 2.19$       | 4.33<br>$\pm 2$         | 0.28<br>$\pm 0.03$    | 0.26<br>$\pm 0.01$    | 0.16<br>$\pm 0.05$   | 4.2<br>$\pm 1.99$       | 0.32<br>$\pm 0.03$    | 0.37<br>$\pm 0.02$     |
| <i>Phvul.006G183600</i>                              | Dormancy/auxin associated protein (Auxin repressed) | 747.6<br>$\pm 677.17$    | 1359.88<br>$\pm 644.52$ | 178.44<br>$\pm 28.08$ | 371.03<br>$\pm 80.11$ | 70.19<br>$\pm 14.64$ | 1089.32<br>$\pm 506.99$ | 334.91<br>$\pm 43.67$ | 414.93<br>$\pm 126.65$ |
| <i>Phvul.006G207600</i>                              | DnaJ homolog subfamily C member                     | 6.39<br>$\pm 6.23$       | 13.67<br>$\pm 6.84$     | 0.08<br>$\pm 0.08$    | 0.21<br>$\pm 0.12$    | 0.32<br>$\pm 0.15$   | 12.22<br>$\pm 6.8$      | 0.18<br>$\pm 0.04$    | 0.14<br>$\pm 0.06$     |
| <i>Phvul.007G017500</i>                              | Major facilitator protein                           | 37.19<br>$\pm 33.19$     | 64.76<br>$\pm 31.02$    | 2.9<br>$\pm 0.68$     | 2.29<br>$\pm 0.22$    | 3.78<br>$\pm 0.12$   | 66.54<br>$\pm 31.23$    | 2.93<br>$\pm 0.16$    | 3.36<br>$\pm 0.35$     |
| <i>Phvul.007G021100</i>                              | PPR repeat (PPR) // PPR repeat family (PPR_2)       | 26.08<br>$\pm 26.02$     | 54.9<br>$\pm 27.38$     | 0.02<br>$\pm 0.01$    | 0.03<br>$\pm 0.02$    | 0.15<br>$\pm 0.02$   | 50.46<br>$\pm 25.12$    | 0.04<br>$\pm 0.02$    | 0.04<br>$\pm 0.02$     |
| <i>Phvul.007G027200</i>                              | B-box zinc finger (ZF-B_box) // CCT motif (CCT)     | 15.39<br>$\pm 15.36$     | 30.91<br>$\pm 15.39$    | 0.05<br>$\pm 0.01$    | 0.06<br>$\pm 0.01$    | 0.07<br>$\pm 0.03$   | 34.99<br>$\pm 18.43$    | 0.04<br>$\pm 0.01$    | 0.05<br>$\pm 0.02$     |
| <i>Phvul.007G042100</i>                              | PPR repeat (PPR) // PPR repeat family (PPR_2)       | 0.76<br>$\pm 0.72$       | 1.01<br>$\pm 0.5$       | 0.31<br>$\pm 0.02$    | 0.46<br>$\pm 0.12$    | 0.11<br>$\pm 0.03$   | 1.01<br>$\pm 0.46$      | 0.26<br>$\pm 0.13$    | 0.51<br>$\pm 0.1$      |
| <i>Phvul.007G074500</i>                              | Protein REVEILLE 3-related                          | 0.9<br>$\pm 0.66$        | 2.52<br>$\pm 1.18$      | 0.33<br>$\pm 0.06$    | 0.27<br>$\pm 0.09$    | 0.1<br>$\pm 0.01$    | 1.74<br>$\pm 0.62$      | 0.2<br>$\pm 0.03$     | 0.14<br>$\pm 0.03$     |
| <i>Phvul.007G090100</i>                              | Isoliquiritigenin 2'-O-methyltransferase            | 3.97<br>$\pm 3.54$       | 10.8<br>$\pm 4.91$      | 0.59<br>$\pm 0.03$    | 0.53<br>$\pm 0.16$    | 0.79<br>$\pm 0.27$   | 8.71<br>$\pm 3.83$      | 0.72<br>$\pm 0.07$    | 0.48<br>$\pm 0.23$     |
| <i>Phvul.007G091400</i>                              | No functional annotation                            | 26.15<br>$\pm 21.24$     | 48.38<br>$\pm 22.07$    | 3.42<br>$\pm 0.33$    | 2.15<br>$\pm 0.55$    | 5.11<br>$\pm 0.86$   | 44.15<br>$\pm 18.28$    | 2.75<br>$\pm 0.18$    | 1.81<br>$\pm 0.61$     |

Table S18 continued

| Gene ID                 | Gene Annotation                                          | Transcript levels (FPKM) |                   |                 |                |                  |                    |                |                |
|-------------------------|----------------------------------------------------------|--------------------------|-------------------|-----------------|----------------|------------------|--------------------|----------------|----------------|
|                         |                                                          | Mock inoculation         |                   |                 |                | Xap inoculation  |                    |                |                |
|                         |                                                          | 0 h PI                   | 8 h PI            | 24 h PI         | 48 h PI        | 0 h PI           | 8 h PI             | 24 h PI        | 48 h PI        |
| <i>Phvul.007G135000</i> | PPR repeat (PPR) // PPR repeat family (PPR_2)            | 2.08<br>±1.67            | 3.24<br>±1.52     | 0.69<br>±0.1    | 1<br>±0.16     | 0.41<br>±0.1     | 2.9<br>±1.24       | 0.86<br>±0.12  | 0.95<br>±0.17  |
| <i>Phvul.007G146900</i> | PPR repeat (PPR) / DYW family of nucleic acid deaminases | 0.7<br>±0.55             | 0.96<br>±0.51     | 0.23<br>±0.03   | 0.67<br>±0.24  | 0.09<br>±0.07    | 0.91<br>±0.42      | 0.46<br>±0.13  | 0.65<br>±0.14  |
| <i>Phvul.007G150700</i> | Nucleolin                                                | 659.01<br>±522.58        | 1095.81<br>±480.8 | 52.02<br>±15.09 | 49.85<br>±9.26 | 147.75<br>±23.13 | 1188.61<br>±518.24 | 45.37<br>±6.63 | 37.61<br>±4.16 |
| <i>Phvul.007G214800</i> | Drought responsive ATP-binding motif containing protein  | 132.58<br>±130.8         | 227.74<br>±114.62 | 0.63<br>±0.14   | 0.83<br>±0.16  | 1.82<br>±0.19    | 248.29<br>±123.38  | 0.6<br>±0.11   | 0.39<br>±0.09  |
| <i>Phvul.008G003500</i> | Protein NRT1/ PTR family 6.1                             | 43.52<br>±31.97          | 82.4<br>±35.48    | 2.49<br>±0.76   | 1.98<br>±0.18  | 10.37<br>±0.43   | 76<br>±32.89       | 2.6<br>±0.32   | 1.56<br>±0.49  |
| <i>Phvul.008G048400</i> | PPR repeat (PPR) // PPR repeat family (PPR_2)            | 3.89<br>±3.7             | 8.92<br>±4.36     | 0.58<br>±0.03   | 0.73<br>±0.18  | 0.22<br>±0.06    | 7.6<br>±3.69       | 0.6<br>±0.11   | 0.98<br>±0.27  |
| <i>Phvul.008G148100</i> | F-box associated                                         | 9.18<br>±7.01            | 19.85<br>±8.64    | 2.08<br>±0.59   | 4.26<br>±0.73  | 1.4<br>±0.47     | 17.56<br>±8.07     | 3.49<br>±0.41  | 4.89<br>±1.21  |
| <i>Phvul.008G222000</i> | Outer membrane protein insertion porin family            | 3.95<br>±3.5             | 8.5<br>±4.12      | 0.34<br>±0.04   | 0.46<br>±0.12  | 0.69<br>±0.18    | 8.15<br>±3.87      | 0.35<br>±0.02  | 0.52<br>±0.16  |
| <i>Phvul.008G225600</i> | No functional annotation                                 | 11.27<br>±10.94          | 24.89<br>±12.45   | 0.32<br>±0.05   | 0.52<br>±0.23  | 0.43<br>±0.08    | 23.28<br>±12.34    | 0.46<br>±0.03  | 0.31<br>±0.08  |
| <i>Phvul.008G264700</i> | Heat shock protein 42                                    | 377.21<br>±375.45        | 755.61<br>±381.03 | 3.84<br>±0.14   | 4.27<br>±0.64  | 2.27<br>±0.57    | 632.39<br>±314.98  | 3.17<br>±0.51  | 3.35<br>±0.4   |
| <i>Phvul.009G013600</i> | Cathepsin L                                              | 319.35<br>±293.42        | 620.61<br>±296.82 | 35.85<br>±2.68  | 45.18<br>±3.62 | 25.05<br>±3.35   | 520.06<br>±244.94  | 43.82<br>±2.85 | 75.51<br>±7.52 |



Table S18 continued

| Gene ID                 | Gene Annotation                                             | Transcript levels (FPKM) |                   |                |                |                 |                  |                |                 |
|-------------------------|-------------------------------------------------------------|--------------------------|-------------------|----------------|----------------|-----------------|------------------|----------------|-----------------|
|                         |                                                             | Mock inoculation         |                   |                |                | Xap inoculation |                  |                |                 |
|                         |                                                             | 0 h PI                   | 8 h PI            | 24 h PI        | 48 h PI        | 0 h PI          | 8 h PI           | 24 h PI        | 48 h PI         |
| <i>Phvul.009G023700</i> | RNA recognition motif                                       | 337.38 ± 258.23          | 632.93 ± 273.95   | 102.56 ± 4.8   | 119.21 ± 2     | 71.38 ± 5.34    | 570.89 ± 248.86  | 96.69 ± 1.24   | 108.65 ± 0.56   |
| <i>Phvul.009G045000</i> | Pseudo-response regulator 5                                 | 38.36 ± 36.7             | 78.8 ± 38.74      | 2.48 ± 0.31    | 2.54 ± 0.73    | 1.73 ± 0.25     | 64.07 ± 31.22    | 2.22 ± 0.25    | 1.76 ± 0.35     |
| <i>Phvul.009G090600</i> | No functional annotation                                    | 4.16 ± 4.16              | 11.68 ± 5.84      | 0 ± 0          | 0.19 ± 0.11    | 0.21 ± 0.16     | 9.58 ± 4.63      | 0.14 ± 0.07    | 0.24 ± 0.04     |
| <i>Phvul.009G152200</i> | Filament-like plant protein 3                               | 15.39 ± 12.56            | 30.53 ± 13.61     | 3.18 ± 0.51    | 4.2 ± 1.07     | 3.68 ± 0.49     | 27.16 ± 11.82    | 4.75 ± 0.24    | 3.89 ± 1.27     |
| <i>Phvul.009G200900</i> | Protein CHUP1, chloroplastic                                | 13.33 ± 12.42            | 29.49 ± 14.06     | 0.67 ± 0.21    | 0.62 ± 0.2     | 1.69 ± 0.36     | 26.17 ± 12.42    | 0.73 ± 0.08    | 0.41 ± 0.1      |
| <i>Phvul.009G227100</i> | Cathepsin H                                                 | 1199.97 ± 1047.1         | 2176.12 ± 1000.87 | 382.64 ± 59.87 | 527.25 ± 40.82 | 185 ± 36.4      | 1957.83 ± 870.98 | 530.82 ± 39.68 | 786.79 ± 103.79 |
| <i>Phvul.009G227800</i> | Germin-like protein subfamily 3                             | 305.85 ± 284.5           | 675.53 ± 330.61   | 0.81 ± 0.15    | 0.73 ± 0.32    | 26.41 ± 5.02    | 656.26 ± 314.65  | 0.67 ± 0.11    | 0.34 ± 0.07     |
| <i>Phvul.009G257000</i> | Serine/threonine kinase                                     | 1.16 ± 0.71              | 0.82 ± 0.34       | 0.32 ± 0.09    | 0.5 ± 0.06     | 0.2 ± 0.08      | 1.32 ± 0.53      | 0.17 ± 0.05    | 0.54 ± 0.24     |
| <i>Phvul.010G023700</i> | F21O3.2 protein-related                                     | 122.77 ± 114.18          | 258.19 ± 123.99   | 10.51 ± 2.75   | 16.12 ± 3.97   | 9.41 ± 1.45     | 228.36 ± 109.62  | 12.77 ± 2.29   | 13.68 ± 4.26    |
| <i>Phvul.010G097300</i> | Bestrophin, RFP-TM, chloride channel                        | 8.25 ± 6.43              | 16.59 ± 7.81      | 2.56 ± 0.33    | 2.97 ± 0.23    | 1.36 ± 0.14     | 13.53 ± 6.21     | 2.68 ± 0.35    | 2.81 ± 0.35     |
| <i>Phvul.010G142600</i> | IAA-amino acid hydrolase ILR1-like 1-related                | 14.47 ± 12.34            | 25.98 ± 11.34     | 3.45 ± 0.36    | 3.19 ± 0.37    | 2.34 ± 0.43     | 27.24 ± 12.42    | 3.67 ± 0.78    | 3.89 ± 0.41     |
| <i>Phvul.010G156300</i> | Post-illumination chlorophyll fluorescence increase protein | 436.85 ± 403.16          | 856.03 ± 411.4    | 28.36 ± 4.08   | 21.94 ± 0.68   | 38.45 ± 6.62    | 769.96 ± 365.62  | 25.71 ± 3.02   | 16.25 ± 2.07    |

Table S18 continued

|                         |                                                                        | Transcript levels (FPKM) |                    |                 |                 |                 |                   |                 |                 |
|-------------------------|------------------------------------------------------------------------|--------------------------|--------------------|-----------------|-----------------|-----------------|-------------------|-----------------|-----------------|
| Gene ID                 | Gene Annotation                                                        | Mock inoculation         |                    |                 |                 | Xap inoculation |                   |                 |                 |
|                         |                                                                        | 0 h PI                   | 8 h PI             | 24 h PI         | 48 h PI         | 0 h PI          | 8 h PI            | 24 h PI         | 48 h PI         |
| <i>Phvul.010G164200</i> | Bactericidal permeability-increasing BPI protein-related               | 8.72<br>±7.08            | 17.53<br>±7.85     | 1.88<br>±0.12   | 2.32<br>±0.17   | 1.47<br>±0.13   | 15.58<br>±7.05    | 1.87<br>±0.18   | 2.66<br>±0.35   |
| <i>Phvul.011G045100</i> | Transcription termination factor family protein                        | 9.7<br>±8.15             | 17.84<br>±8.09     | 2.26<br>±0.39   | 1.92<br>±0.25   | 2.28<br>±0.05   | 16.48<br>±6.95    | 2.01<br>±0.35   | 1.47<br>±0.17   |
| <i>Phvul.011G050000</i> | Expressed protein                                                      | 117.31<br>±113.92        | 236.62<br>±116.38  | 3.4<br>±0.53    | 5.45<br>±0.84   | 2.13<br>±0.62   | 197.02<br>±97.47  | 5.4<br>±0.91    | 4.97<br>±0.93   |
| <i>Phvul.011G056500</i> | Protein C13C4.7                                                        | 854.87<br>±748.9         | 1685.46<br>±856.19 | 61.81<br>±30.64 | 30.85<br>±13.61 | 95.55<br>±12.36 | 1542.9<br>±722.81 | 85.04<br>±30.12 | 100.18<br>±47.3 |
| <i>Phvul.011G056900</i> | Lysine-specific demethylase 8                                          | 11.31<br>±11.18          | 21.71<br>±10.78    | 0.24<br>±0.02   | 0.36<br>±0.22   | 0.28<br>±0.12   | 17.73<br>±8.81    | 0.19<br>±0.02   | 0.27<br>±0.08   |
| <i>Phvul.011G062100</i> | MYB-like DNA-binding domain                                            | 7.93<br>±7.79            | 13.6<br>±6.74      | 0.31<br>±0.1    | 0.13<br>±0.05   | 0.19<br>±0.07   | 14.21<br>±6.84    | 0.41<br>±0.11   | 0.48<br>±0.1    |
| <i>Phvul.011G090500</i> | Nucleobase-ascorbate transporter 12                                    | 4.02<br>±3.41            | 9.53<br>±4.49      | 0.53<br>±0.05   | 0.45<br>±0.03   | 0.9<br>±0.24    | 8.59<br>±3.97     | 0.49<br>±0.1    | 0.37<br>±0.04   |
| <i>Phvul.011G138600</i> | Anthocyanidin 3- <i>O</i> -glucoside 2"- <i>O</i> -glucosyltransferase | 9.51<br>±9.13            | 20.42<br>±10.01    | 0.08<br>±0.05   | 0.2<br>±0.05    | 0.52<br>±0.1    | 17.17<br>±8.19    | 0.28<br>±0.12   | 0.1<br>±0.01    |
| <i>Phvul.011G163100</i> | Methyltransferase-like protein 20                                      | 3.23<br>±2.74            | 5.06<br>±2.64      | 0.46<br>±0.09   | 0.62<br>±0.19   | 0.44<br>±0.04   | 6.71<br>±3.04     | 0.52<br>±0.08   | 0.54<br>±0.07   |
| XLOC_006186             | No functional annotation                                               | 1.22<br>±0.45            | 1.13<br>±0.21      | 1.16<br>±0.55   | 1.25<br>±0.14   | 0<br>±0         | 2.92<br>±2        | 2.86<br>±1.25   | 4.6<br>±2.78    |

Table S18 continued

|                     |                                                               | Transcript levels (FPKM) |                    |                |                 |                 |                   |                  |                |
|---------------------|---------------------------------------------------------------|--------------------------|--------------------|----------------|-----------------|-----------------|-------------------|------------------|----------------|
| Gene ID             | Gene Annotation                                               | Mock inoculation         |                    |                |                 | Xap inoculation |                   |                  |                |
|                     |                                                               | 0 h PI                   | 8 h PI             | 24 h PI        | 48 h PI         | 0 h PI          | 8 h PI            | 24 h PI          | 48 h PI        |
| CBB-susceptible RIL |                                                               |                          |                    |                |                 |                 |                   |                  |                |
| Phvul.001G085200    | A. thaliana mRNA (ORF19) from chromosome iii                  | 935.03<br>±885.18        | 2944.13<br>±182.69 | 63.59<br>±7.86 | 55.38<br>±27.46 | 52.52<br>±13.07 | 3098.13<br>±77.18 | 132.07<br>±33.56 | 70.5<br>±13.14 |
| Phvul.001G220100    | Cathepsin B /<br>Cathepsin B1                                 | 41.42<br>±32.81          | 122.34<br>±9.35    | 8.51<br>±0.59  | 8.9<br>±0.96    | 7.48<br>±0.93   | 122.03<br>±5.12   | 9.93<br>±1.44    | 7.81<br>±0.7   |
| Phvul.001G226300    | DnaJ homolog<br>subfamily C member                            | 24.86<br>±23.39          | 76.17<br>±4        | 0.56<br>±0.18  | 0.77<br>±0.16   | 0.55<br>±0.16   | 77.9<br>±2.37     | 0.67<br>±0.04    | 0.56<br>±0.1   |
| Phvul.001G242900    | Protein early flowering<br>4                                  | 122.31<br>±116.77        | 311.07<br>±17.44   | 5.13<br>±0.46  | 4.99<br>±1.16   | 2.32<br>±0.42   | 389.03<br>±43.28  | 5.36<br>±0.39    | 3.96<br>±0.5   |
| Phvul.002G018400    | CGI-141-related/lipase<br>containing protein                  | 20.13<br>±17.49          | 54.52<br>±1.13     | 2.3<br>±0.3    | 2.17<br>±0.18   | 3.05<br>±0.17   | 60.75<br>±1.07    | 2.51<br>±0.29    | 2.28<br>±0.21  |
| Phvul.002G060000    | F5O11.5                                                       | 1.74<br>±1.25            | 3.73<br>±0.29      | 0.7<br>±0.18   | 0.66<br>±0.03   | 0.37<br>±0.27   | 4.09<br>±0.75     | 0.97<br>±0.1     | 0.86<br>±0.16  |
| Phvul.002G084700    | PPR repeat (PPR)/<br>DYW family of nucleic<br>acid deaminases | 1<br>±0.88               | 2.37<br>±0.25      | 0.43<br>±0.11  | 0.63<br>±0.06   | 0.19<br>±0.03   | 3.08<br>±0.32     | 0.63<br>±0.14    | 0.55<br>±0.28  |
| Phvul.002G093000    | DnaJ homolog<br>subfamily C member                            | 11.38<br>±11.18          | 34.68<br>±0.51     | 0.2<br>±0.06   | 0.11<br>±0.03   | 0.27<br>±0.08   | 37.1<br>±1.66     | 0.14<br>±0.08    | 0.2<br>±0.06   |
| Phvul.002G096000    | Phosphoglucumutase                                            | 45.04<br>±42.34          | 146.65<br>±9.64    | 1.07<br>±0.23  | 1.25<br>±0.32   | 3.91<br>±1.02   | 147.06<br>±4.52   | 1.91<br>±0.47    | 1.76<br>±0.05  |
| Phvul.002G110800    | Histone H1                                                    | 75.93<br>±58.69          | 200.11<br>±8.89    | 25.55<br>±1.65 | 47.53<br>±9.6   | 11.28<br>±2.69  | 186.45<br>±8.46   | 43.79<br>±13.25  | 33.29<br>±8.39 |
| Phvul.002G111900    | Ferulate-5-hydroxylase                                        | 6.78<br>±5.76            | 17.19<br>±0.53     | 2.77<br>±0.49  | 3.14<br>±0.35   | 1.25<br>±0.38   | 19.06<br>±1.25    | 3.11<br>±0.22    | 2.98<br>±0.25  |
| Phvul.002G120500    | Pentatricopeptide<br>repeat-containing<br>protein             | 2.91<br>±2.67            | 8.16<br>±0.49      | 0.84<br>±0.14  | 1.5<br>±0.18    | 0.38<br>±0.07   | 9.4<br>±0.8       | 1.27<br>±0.35    | 1.07<br>±0.44  |

Table S18 continued

|                                                      |                                                                                                       | Transcript levels (FPKM) |                  |               |                |                 |                  |                |               |
|------------------------------------------------------|-------------------------------------------------------------------------------------------------------|--------------------------|------------------|---------------|----------------|-----------------|------------------|----------------|---------------|
| Gene ID                                              | Gene Annotation                                                                                       | Mock inoculation         |                  |               |                | Xap inoculation |                  |                |               |
|                                                      |                                                                                                       | 0 h PI                   | 8 h PI           | 24 h PI       | 48 h PI        | 0 h PI          | 8 h PI           | 24 h PI        | 48 h PI       |
| <i>Phvul.002G213300</i>                              | Nicotinamidase /<br>Nicotine deamidase                                                                | 29.79<br>±27.15          | 88.23<br>±14.82  | 3.22<br>±0.36 | 7.44<br>±1.72  | 1.97<br>±0.6    | 93.3<br>±1.99    | 10.02<br>±3.72 | 5.93<br>±0.82 |
| <i>Phvul.002G234400</i>                              | Bifunctional<br>inhibitor/lipid-transfer<br>protein/seed storage 2S<br>albumin superfamily<br>protein | 21.53<br>±18.42          | 65<br>±4.38      | 3.33<br>±0.58 | 5.42<br>±1.4   | 4.28<br>±0.37   | 65.04<br>±2.89   | 5.71<br>±1.48  | 5.46<br>±0.79 |
| <i>Phvul.002G263100</i>                              | No functional<br>annotation                                                                           | 23.71<br>±22             | 69.17<br>±2.63   | 1.31<br>±0.43 | 1.17<br>±0.24  | 1.4<br>±0.19    | 80.84<br>±3.27   | 0.85<br>±0.02  | 0.72<br>±0.23 |
| <i>Phvul.002G309600</i>                              | NADP-dependent<br>malic enzyme 1                                                                      | 36.83<br>±29.7           | 96.67<br>±3.23   | 3.74<br>±0.25 | 3.35<br>±0.18  | 8.48<br>±0.54   | 99.21<br>±1.24   | 3.97<br>±0.64  | 3.42<br>±0.28 |
| <i>Phvul.002G314000</i> ,<br><i>Phvul.002G314100</i> | Aldehyde<br>dehydrogenase<br>(NAD(P) <sup>(+)</sup> )                                                 | 17.27<br>±12.96          | 43.69<br>±2.83   | 5.03<br>±0.38 | 11.72<br>±0.33 | 2.86<br>±0.41   | 41.69<br>±3.94   | 11.09<br>±4.89 | 7.69<br>±2.24 |
| <i>Phvul.002G321800</i>                              | Flavin-binding kelch<br>repeat F-box protein 1                                                        | 18.12<br>±17.59          | 51.53<br>±1.5    | 0.09<br>±0.02 | 0.14<br>±0.02  | 0.19<br>±0.06   | 51.07<br>±2.45   | 0.16<br>±0.06  | 0.08<br>±0.02 |
| <i>Phvul.002G326700</i>                              | Multidrug resistance<br>protein                                                                       | 32<br>±30.11             | 97.94<br>±7.52   | 0.89<br>±0.09 | 0.96<br>±0.31  | 1.65<br>±0.53   | 104.43<br>±4.41  | 0.86<br>±0.11  | 0.92<br>±0.12 |
| <i>Phvul.003G004300</i>                              | Molecular chaperone<br>(DnaJ superfamily)                                                             | 118.59<br>±115.54        | 353.86<br>±14.75 | 0.81<br>±0.22 | 1.3<br>±0.39   | 1.59<br>±0.24   | 436.85<br>±38.77 | 0.65<br>±0.05  | 0.81<br>±0.14 |
| <i>Phvul.003G022000</i>                              | Clathrin assembly<br>protein                                                                          | 10.92<br>±9.31           | 29.33<br>±1.26   | 0.97<br>±0.21 | 2.52<br>±0.68  | 1.61<br>±0.2    | 32.74<br>±4.51   | 1.35<br>±0.31  | 1.3<br>±0.05  |
| <i>Phvul.003G044600</i>                              | Glutamate<br>formimidoyltransferase                                                                   | 3.63<br>±2.64            | 8.6<br>±0.38     | 0.41<br>±0.15 | 0.28<br>±0.05  | 0.61<br>±0.05   | 9.15<br>±0.98    | 0.25<br>±0.14  | 0.53<br>±0.06 |
| <i>Phvul.003G124400</i>                              | Genomic DNA,<br>chromosome 3, P1<br>clone: MKP6                                                       | 8.81<br>±5.68            | 18.75<br>±1.07   | 1.87<br>±0.45 | 2.9<br>±0.8    | 1.23<br>±0.41   | 18.06<br>±1.14   | 3.41<br>±0.52  | 3.48<br>±1.18 |

Table S18 continued

|                         |                                                                                | Transcript levels (FPKM) |                  |               |               |                 |                  |               |               |
|-------------------------|--------------------------------------------------------------------------------|--------------------------|------------------|---------------|---------------|-----------------|------------------|---------------|---------------|
| Gene ID                 | Gene Annotation                                                                | Mock inoculation         |                  |               |               | Xap inoculation |                  |               |               |
|                         |                                                                                | 0 h PI                   | 8 h PI           | 24 h PI       | 48 h PI       | 0 h PI          | 8 h PI           | 24 h PI       | 48 h PI       |
| <i>Phvul.003G131400</i> | Germin-like protein subfamily 3                                                | 76.08<br>±69.28          | 149.08<br>±34.8  | 0.54<br>±0.03 | 0.05<br>±0.02 | 7.82<br>±1.52   | 158.5<br>±17.37  | 0.35<br>±0.05 | 0.44<br>±0.19 |
| <i>Phvul.003G142200</i> | Δ(4)-3-oxosteroid 5-β-reductase                                                | 4.83<br>±3.78            | 14.48<br>±3.75   | 0.7<br>±0.09  | 0.43<br>±0.16 | 1.2<br>±0.42    | 16.2<br>±3.53    | 0.96<br>±0.07 | 0.94<br>±0.47 |
| <i>Phvul.003G148400</i> | Allergen V5/TPX-1-related family protein-related                               | 15.43<br>±11.05          | 32.42<br>±5.55   | 2.18<br>±0.57 | 1.5<br>±0.33  | 2.76<br>±0.69   | 37.27<br>±5.54   | 6.97<br>±4.72 | 5.84<br>±3.94 |
| <i>Phvul.003G198500</i> | RNA-dependent RNA polymerase 2                                                 | 1.21<br>±0.83            | 3.15<br>±0.27    | 0.64<br>±0.05 | 0.8<br>±0.13  | 0.28<br>±0.03   | 3.2<br>±0.13     | 0.63<br>±0.16 | 0.46<br>±0.05 |
| <i>Phvul.003G209600</i> | β-lactamase / Penicillinase                                                    | 12.49<br>±10.61          | 33.23<br>±1.48   | 1.78<br>±0.21 | 2.01<br>±0.38 | 2.18<br>±0.3    | 36.52<br>±1.72   | 2.21<br>±0.53 | 1.85<br>±0.16 |
| <i>Phvul.003G249200</i> | No functional annotation                                                       | 4.46<br>±3.66            | 12.45<br>±0.5    | 1.5<br>±0.16  | 2.03<br>±0.42 | 0.7<br>±0.27    | 11.53<br>±0.97   | 1.99<br>±0.63 | 1.89<br>±0.33 |
| <i>Phvul.003G295900</i> | No functional annotation                                                       | 115.33<br>±112.76        | 383.84<br>±30.19 | 1.77<br>±0.31 | 1.62<br>±0.08 | 1.72<br>±0.35   | 453.7<br>±20.73  | 1.78<br>±0.5  | 1.5<br>±0.15  |
| <i>Phvul.004G079500</i> | NDH-dependent cyclic electron flow 5                                           | 71.39<br>±70             | 218<br>±0.83     | 0.81<br>±0.14 | 0.73<br>±0.02 | 1<br>±0.08      | 232.96<br>±2.38  | 0.88<br>±0.13 | 0.84<br>±0.29 |
| <i>Phvul.004G082300</i> | Tyrosine-specific transport protein                                            | 12.24<br>±9.34           | 32.77<br>±2.32   | 1.47<br>±0.28 | 1.32<br>±0.23 | 2.39<br>±0.22   | 34.58<br>±0.8    | 1.3<br>±0.22  | 1.34<br>±0.15 |
| <i>Phvul.004G088300</i> | Gigantea (GI)                                                                  | 24.15<br>±23.04          | 71.62<br>±1.96   | 0.6<br>±0.04  | 0.8<br>±0.29  | 1.06<br>±0.1    | 76.31<br>±0.81   | 0.5<br>±0.05  | 0.65<br>±0.06 |
| <i>Phvul.004G106700</i> | Protein of unknown function                                                    | 148.43<br>±139.46        | 446.06<br>±4.75  | 2.88<br>±0.27 | 2.24<br>±0.08 | 9.12<br>±0.33   | 486.81<br>±17.67 | 3.08<br>±0.24 | 2.99<br>±0.38 |
| <i>Phvul.004G114700</i> | Leucine Rich Repeat (LRR_1) // Leucine rich repeat N-terminal domain (LRRNT_2) | 1.77<br>±1.5             | 4.69<br>±0.51    | 0.13<br>±0.02 | 0.99<br>±0.64 | 0.12<br>±0.05   | 5.47<br>±0.38    | 0.23<br>±0.09 | 0.38<br>±0.2  |
| <i>Phvul.004G119400</i> | No functional annotation                                                       | 2.5<br>±2.51             | 8.97<br>±1.2     | 0<br>±0       | 0<br>±0       | 0<br>±0         | 11.53<br>±1.18   | 0<br>±0       | 0<br>±0       |

Table S18 continued

| Gene ID                                              | Gene Annotation                                       | Transcript levels (FPKM) |                  |               |               |                 |                   |               |               |
|------------------------------------------------------|-------------------------------------------------------|--------------------------|------------------|---------------|---------------|-----------------|-------------------|---------------|---------------|
|                                                      |                                                       | Mock inoculation         |                  |               |               | Xap inoculation |                   |               |               |
|                                                      |                                                       | 0 h PI                   | 8 h PI           | 24 h PI       | 48 h PI       | 0 h PI          | 8 h PI            | 24 h PI       | 48 h PI       |
| <i>Phvul.004G133000</i>                              | Member of 'GDYG' family of lipolytic enzymes          | 5.72<br>±5.39            | 19.11<br>±1      | 0.39<br>±0.06 | 0.31<br>±0.12 | 0.51<br>±0.25   | 18.09<br>±1.38    | 0.17<br>±0.07 | 0.59<br>±0.13 |
| <i>Phvul.005G032700</i>                              | Dirigent protein 20-related                           | 2.73<br>±1.73            | 5.94<br>±0.34    | 0.91<br>±0.08 | 0.59<br>±0.05 | 0.6<br>±0.15    | 5.58<br>±0.52     | 1<br>±0.12    | 0.65<br>±0.09 |
| <i>Phvul.005G104600</i>                              | Expansin-B1-related                                   | 20.15<br>±15.15          | 31.57<br>±6.85   | 2.43<br>±0.46 | 0.66<br>±0.21 | 4.39<br>±0.59   | 24.97<br>±4.26    | 1.77<br>±0.2  | 1.65<br>±0.4  |
| <i>Phvul.005G174000</i>                              | ATP:ADP antiporter, AAA family                        | 72.19<br>±62.22          | 193.57<br>±6.07  | 4.81<br>±0.94 | 5.43<br>±2.78 | 10.28<br>±1.03  | 210.12<br>±4.85   | 8.02<br>±1.94 | 4.36<br>±1.2  |
| <i>Phvul.006G063800</i>                              | No functional annotation                              | 109.07<br>±107.01        | 311.04<br>±14.3  | 0.63<br>±0.16 | 0.33<br>±0.13 | 1.21<br>±0.22   | 355.65<br>±6.16   | 0.47<br>±0.01 | 0.46<br>±0.03 |
| <i>Phvul.006G064100</i>                              | α-Glucan phosphorylase 2, cytosolic                   | 51.9<br>±46.54           | 159.27<br>±7.81  | 4.3<br>±0.16  | 3.99<br>±0.56 | 5.2<br>±0.24    | 171.81<br>±1.85   | 4.05<br>±0.23 | 3.72<br>±0.38 |
| <i>Phvul.006G065300</i>                              | Phosphomethyl-pyrimidine synthase                     | 335.18<br>±321.36        | 990.33<br>±18.39 | 5.27<br>±0.53 | 4.79<br>±0.69 | 9.7<br>±0.35    | 1117.41<br>±41.12 | 6.23<br>±0.31 | 5.54<br>±0.4  |
| <i>Phvul.006G067600</i>                              | Ring finger protein 41, 151                           | 8.21<br>±6.93            | 23.81<br>±2.98   | 2.07<br>±0.4  | 2.04<br>±0.67 | 1.65<br>±0.12   | 26.18<br>±1.59    | 2.55<br>±1.05 | 1.93<br>±0.2  |
| <i>Phvul.006G117800</i>                              | Pre-mRNA 3'-end-processing factor FIP1 (FIP1L1, FIP1) | 0.88<br>±0.72            | 1.98<br>±0.23    | 0.24<br>±0.08 | 0.18<br>±0.03 | 0.08<br>±0.02   | 2.31<br>±0.25     | 0.27<br>±0.01 | 0.3<br>±0.05  |
| <i>Phvul.006G146300</i>                              | Chaperonin-like RBCX protein                          | 60.05<br>±57.54          | 188.11<br>±1.23  | 0.19<br>±0.05 | 0.21<br>±0.03 | 0.89<br>±0.13   | 220.61<br>±17.82  | 0.03<br>±0.03 | 0.12<br>±0.08 |
| <i>Phvul.006G151300</i> ,<br><i>Phvul.006G151400</i> | β-glucosidase 45-related                              | 3.22<br>±2.72            | 9.85<br>±0.6     | 0.9<br>±0.17  | 0.94<br>±0.17 | 0.49<br>±0.1    | 10.06<br>±1.37    | 1.32<br>±0.39 | 1.18<br>±0.38 |
| <i>Phvul.006G168800</i>                              | Proprotein convertase subtilisin/kexin                | 2.94<br>±2.68            | 8.19<br>±0.17    | 0.37<br>±0.02 | 0.35<br>±0.01 | 0.22<br>±0.09   | 8.08<br>±0.13     | 0.26<br>±0.04 | 0.37<br>±0.07 |

Table S18 continued

| Gene ID                 | Gene Annotation                                     | Transcript levels (FPKM) |                    |                  |                 |                 |                    |                   |                  |
|-------------------------|-----------------------------------------------------|--------------------------|--------------------|------------------|-----------------|-----------------|--------------------|-------------------|------------------|
|                         |                                                     | Mock inoculation         |                    |                  |                 | Xap inoculation |                    |                   |                  |
|                         |                                                     | 0 h PI                   | 8 h PI             | 24 h PI          | 48 h PI         | 0 h PI          | 8 h PI             | 24 h PI           | 48 h PI          |
| <i>Phvul.006G183600</i> | Dormancy/auxin associated protein (Auxin repressed) | 858.7<br>±781.6          | 2585.37<br>±142.81 | 142.07<br>±27.12 | 174.1<br>±54.63 | 72.73<br>±11.27 | 2563.23<br>±122.83 | 283.78<br>±117.96 | 176.72<br>±22.55 |
| <i>Phvul.006G207600</i> | DnaJ homolog subfamily C member                     | 6.94<br>±6.69            | 19.4<br>±1.46      | 0.1<br>±0.01     | 0.24<br>±0.24   | 0.22<br>±0.12   | 20.76<br>±1.44     | 0.17<br>±0.09     | 0.36<br>±0.13    |
| <i>Phvul.007G017500</i> | Major facilitator protein                           | 35.33<br>±29.92          | 98.92<br>±6.14     | 3.73<br>±0.3     | 3.15<br>±0.8    | 4.93<br>±0.46   | 116.81<br>±10.78   | 2.97<br>±0.27     | 3.02<br>±0.26    |
| <i>Phvul.007G021100</i> | PPR repeat (PPR) // PPR repeat family (PPR 2)       | 24.51<br>±24.12          | 72.7<br>±3.14      | 0.07<br>±0.03    | 0.04<br>±0.02   | 0.1<br>±0.05    | 78.12<br>±3.04     | 0.01<br>±0.01     | 0.04<br>±0.02    |
| <i>Phvul.007G027200</i> | B-box zinc finger (ZF-B box) // CCT motif           | 15.47<br>±15.33          | 44<br>±1.93        | 0.06<br>±0.03    | 0.06<br>±0.03   | 0.14<br>±0.09   | 60.23<br>±4.64     | 0.13<br>±0.05     | 0.03<br>±0.01    |
| <i>Phvul.007G042100</i> | PPR repeat (PPR) // PPR repeat family (PPR 2)       | 0.71<br>±0.61            | 1.33<br>±0.16      | 0.22<br>±0.1     | 0.49<br>±0.13   | 0.11<br>±0.03   | 1.62<br>±0.31      | 0.17<br>±0.11     | 0.41<br>±0.14    |
| <i>Phvul.007G074500</i> | Protein REVEILLE 3-related                          | 1.23<br>±1.07            | 3.29<br>±0.61      | 0.26<br>±0.08    | 0.23<br>±0.03   | 0.16<br>±0.07   | 3.14<br>±0.21      | 0.27<br>±0.05     | 0.18<br>±0.03    |
| <i>Phvul.007G090100</i> | Isoliquiritigenin 2'-O-methyltransferase            | 2.91<br>±2.46            | 11.69<br>±1.48     | 0.28<br>±0.02    | 0.1<br>±0.02    | 0.42<br>±0.16   | 11.41<br>±1.57     | 0.39<br>±0.13     | 0.27<br>±0.09    |
| <i>Phvul.007G091400</i> | No functional annotation                            | 19.85<br>±13.38          | 47.64<br>±1.25     | 3.48<br>±0.45    | 2.51<br>±0.49   | 4.96<br>±1.06   | 57.18<br>±8.72     | 2.22<br>±0.45     | 3.1<br>±0.55     |
| <i>Phvul.007G135000</i> | PPR repeat (PPR) // PPR repeat family (PPR 2)       | 1.68<br>±1.41            | 4.79<br>±0.26      | 0.61<br>±0.11    | 0.74<br>±0.15   | 0.29<br>±0.01   | 5.15<br>±0.55      | 0.56<br>±0.17     | 0.76<br>±0.24    |
| <i>Phvul.007G146900</i> | PPR repeat (PPR) / (DYW deaminase)                  | 0.75<br>±0.35            | 1.18<br>±0.59      | 0.21<br>±0.12    | 0.66<br>±0.2    | 0.1<br>±0.04    | 1.61<br>±0.27      | 0.32<br>±0.01     | 0.35<br>±0.14    |
| <i>Phvul.007G150700</i> | Nucleolin (NCL, NSR1)                               | 509.71<br>±447.24        | 923.43<br>±461.93  | 35.49<br>±4.77   | 35.08<br>±7.33  | 92.09<br>±3.71  | 1462.25<br>±49.26  | 34.6<br>±4.82     | 39.54<br>±8.43   |

Table S18 continued

| Gene ID                 | Gene Annotation                                                    | Transcript levels (FPKM) |                   |                |                |                 |                   |                |                |
|-------------------------|--------------------------------------------------------------------|--------------------------|-------------------|----------------|----------------|-----------------|-------------------|----------------|----------------|
|                         |                                                                    | Mock inoculation         |                   |                |                | Xap inoculation |                   |                |                |
|                         |                                                                    | 0 h PI                   | 8 h PI            | 24 h PI        | 48 h PI        | 0 h PI          | 8 h PI            | 24 h PI        | 48 h PI        |
| <i>Phvul.007G214800</i> | Drought responsive ATP-binding motif containing protein            | 81.55<br>±78.7           | 162.28<br>±81.17  | 0.75<br>±0.25  | 0.96<br>±0.15  | 1.48<br>±0.35   | 299.22<br>±21.15  | 0.75<br>±0.14  | 0.71<br>±0.12  |
| <i>Phvul.008G003500</i> | Protein NRT1/ PTR family 6.1                                       | 46.9<br>±37.25           | 86.77<br>±43.54   | 2.18<br>±0.16  | 1.54<br>±0.24  | 9.72<br>±0.21   | 133.09<br>±1.26   | 2.75<br>±0.29  | 2.19<br>±0.32  |
| <i>Phvul.008G048400</i> | PPR repeat (PPR) // PPR repeat family (PPR 2)                      | 4.67<br>±4.37            | 8.72<br>±4.36     | 0.32<br>±0.05  | 0.67<br>±0.2   | 0.22<br>±0.05   | 13.58<br>±0.68    | 0.39<br>±0.18  | 0.5<br>±0.16   |
| <i>Phvul.008G148100</i> | F-box associated (FBA 1) // F-box-like                             | 11.04<br>±9.08           | 20.6<br>±10.3     | 2.05<br>±0.15  | 2.57<br>±0.23  | 1.92<br>±0.43   | 32.6<br>±0.35     | 2.45<br>±0.57  | 3.13<br>±0.7   |
| <i>Phvul.008G222000</i> | Outer membrane protein insertion porin family (SAM50, TOB55, BamA) | 3.94<br>±3.55            | 8.36<br>±4.19     | 0.44<br>±0.06  | 0.41<br>±0.05  | 0.44<br>±0.01   | 13.35<br>±0.71    | 0.35<br>±0.08  | 0.36<br>±0.08  |
| <i>Phvul.008G225600</i> | No functional annotation                                           | 10.45<br>±9.95           | 19.35<br>±9.68    | 0.3<br>±0.05   | 0.33<br>±0.03  | 0.34<br>±0.13   | 37.37<br>±2.59    | 0.39<br>±0.09  | 0.39<br>±0.1   |
| <i>Phvul.008G264700</i> | Heat shock protein 42                                              | 328.92<br>±321.83        | 699.76<br>±350.95 | 1.31<br>±0.21  | 1.87<br>±0.1   | 3.26<br>±0.38   | 1194.12<br>±95.48 | 1.82<br>±0.51  | 1.79<br>±0.25  |
| <i>Phvul.009G013600</i> | Cathepsin L                                                        | 323.57<br>±288.69        | 654.49<br>±333.05 | 23.02<br>±2.99 | 32.49<br>±3.68 | 30.87<br>±5.55  | 1051.09<br>±36.36 | 33.45<br>±8.51 | 29.51<br>±6.9  |
| <i>Phvul.009G023700</i> | RNA recognition motif                                              | 299.87<br>±237.27        | 556.6<br>±278.53  | 70.22<br>±2.26 | 71.01<br>±2.57 | 61.72<br>±3.52  | 835.11<br>±9.23   | 74.65<br>±1.89 | 72.97<br>±3.57 |
| <i>Phvul.009G045000</i> | Pseudo-response regulator 5 (PRR5)                                 | 44.99<br>±41.6           | 81.96<br>±41.04   | 3.1<br>±0.41   | 2.53<br>±0.37  | 3.51<br>±0.41   | 131<br>±3.9       | 3.2<br>±0.09   | 2.61<br>±0.46  |
| <i>Phvul.009G090600</i> | No functional annotation                                           | 8.14<br>±7.85            | 16.29<br>±8.34    | 0.22<br>±0.12  | 0.26<br>±0.09  | 0.55<br>±0.09   | 28.75<br>±1.47    | 0.16<br>±0.05  | 0.49<br>±0.17  |



Table S18 continued

|                         |                                                             | Transcript levels (FPKM) |                   |                  |                  |                  |                    |                   |                   |
|-------------------------|-------------------------------------------------------------|--------------------------|-------------------|------------------|------------------|------------------|--------------------|-------------------|-------------------|
| Gene ID                 | Gene Annotation                                             | Mock inoculation         |                   |                  |                  | Xap inoculation  |                    |                   |                   |
|                         |                                                             | 0 h PI                   | 8 h PI            | 24 h PI          | 48 h PI          | 0 h PI           | 8 h PI             | 24 h PI           | 48 h PI           |
| <i>Phvul.009G152200</i> | Filament-like plant protein 3                               | 16.13<br>±13.48          | 28.43<br>±14.22   | 3.51<br>±0.19    | 3.18<br>±0.96    | 3.34<br>±0.41    | 45.77<br>±1.33     | 5.23<br>±0.88     | 3.71<br>±0.39     |
| <i>Phvul.009G200900</i> | Protein CHUP1, chloroplastic                                | 11.88<br>±11.37          | 23.27<br>±11.64   | 0.35<br>±0.03    | 0.22<br>±0.04    | 0.76<br>±0.14    | 37.34<br>±3.19     | 0.59<br>±0.06     | 0.55<br>±0.05     |
| <i>Phvul.009G227100</i> | Cathepsin H (CTSH)                                          | 1190.97<br>±1009.11      | 2332<br>±1176.28  | 270.03<br>±35.48 | 502.68<br>±85.24 | 213.99<br>±49.55 | 3821.31<br>±225.14 | 450.49<br>±139.55 | 437.93<br>±166.38 |
| <i>Phvul.009G227800</i> | Germin-like protein subfamily 3                             | 301.5<br>±287.71         | 565.99<br>±283.69 | 0.87<br>±0.3     | 0.51<br>±0.09    | 16.86<br>±3.38   | 876.11<br>±87      | 1.23<br>±0.68     | 0.99<br>±0.45     |
| <i>Phvul.009G257000</i> | Serine/threonine kinase                                     | 0.82<br>±0.47            | 1.07<br>±0.54     | 0.19<br>±0.09    | 0.31<br>±0.12    | 0.13<br>±0.03    | 1.51<br>±0.19      | 0.23<br>±0.08     | 0.22<br>±0.1      |
| <i>Phvul.010G023700</i> | F21O3.2 protein-related                                     | 126.49<br>±115.58        | 248.01<br>±124.1  | 10.49<br>±1.21   | 10.4<br>±3.37    | 12.9<br>±2.59    | 416.16<br>±10.84   | 14.67<br>±2.62    | 11.99<br>±0.75    |
| <i>Phvul.010G097300</i> | Bestrophin, RFP-TM, chloride channel                        | 7.87<br>±6.69            | 15.25<br>±7.75    | 2.23<br>±0.39    | 2.62<br>±0.24    | 1.41<br>±0.07    | 22.22<br>±1.2      | 1.84<br>±0.25     | 2.2<br>±0.42      |
| <i>Phvul.010G142600</i> | IAA-amino acid hydrolase ILR1-like 1-related                | 13.29<br>±9.9            | 23.02<br>±11.55   | 2.84<br>±0.21    | 3.06<br>±0.64    | 2.71<br>±0.42    | 34.53<br>±0.54     | 3.53<br>±0.23     | 3.01<br>±0.22     |
| <i>Phvul.010G156300</i> | Post-illumination chlorophyll fluorescence increase protein | 386.94<br>±348.79        | 777.68<br>±389.57 | 25.44<br>±1.6    | 23.7<br>±5.09    | 33.47<br>±4.72   | 1328.07<br>±70.19  | 24.09<br>±3.13    | 26.1<br>±2.39     |
| <i>Phvul.010G164200</i> | Bactericidal permeability-increasing BPI protein-related    | 9.01<br>±7.97            | 17.27<br>±8.69    | 0.77<br>±0.16    | 1.09<br>±0.3     | 1.29<br>±0.21    | 25.48<br>±0.66     | 1<br>±0.08        | 1.22<br>±0.05     |
| <i>Phvul.011G045100</i> | Transcription termination factor family protein             | 7.77<br>±6.36            | 14.17<br>±7.09    | 1.4<br>±0.13     | 1.63<br>±0.16    | 1.72<br>±0.1     | 22.9<br>±0.38      | 1.73<br>±0.23     | 1.63<br>±0.23     |

Table S18 continued

| Gene ID                 | Gene Annotation                                                        | Transcript levels (FPKM) |                    |                |               |                        |                    |                |               |
|-------------------------|------------------------------------------------------------------------|--------------------------|--------------------|----------------|---------------|------------------------|--------------------|----------------|---------------|
|                         |                                                                        | Mock inoculation         |                    |                |               | <i>Xap</i> inoculation |                    |                |               |
|                         |                                                                        | 0 h PI                   | 8 h PI             | 24 h PI        | 48 h PI       | 0 h PI                 | 8 h PI             | 24 h PI        | 48 h PI       |
| <i>Phvul.011G050000</i> | Expressed protein                                                      | 109.56 ±<br>105.68       | 229.68<br>±114.9   | 1.6<br>±0.44   | 2<br>±0.43    | 1.69<br>±0.21          | 414.39<br>±12.14   | 1.74<br>±0.62  | 1.87<br>±0.36 |
| <i>Phvul.011G056500</i> | Protein C13C4.7                                                        | 719.9<br>±634.74         | 1522.89<br>±785.77 | 26.43<br>±8.04 | 32.64<br>±6.7 | 97.19<br>±13.01        | 2329.47<br>±175.92 | 45.69<br>±2.36 | 52.99<br>±6.9 |
| <i>Phvul.011G056900</i> | Lysine-specific demethylase 8 (KDM8, JMJD5)                            | 8.53<br>±8.27            | 19.03<br>±9.64     | 0.16<br>±0.03  | 0.16<br>±0    | 0.2<br>±0.08           | 29.43<br>±2.03     | 0.34<br>±0.08  | 0.19<br>±0.03 |
| <i>Phvul.011G062100</i> | MYB-like DNA-binding domain                                            | 7.43<br>±7.07            | 12.79<br>±6.4      | 0.3<br>±0.1    | 0.24<br>±0.02 | 0.37<br>±0.03          | 21.99<br>±2.2      | 0.2<br>±0.06   | 0.39<br>±0.06 |
| <i>Phvul.011G090500</i> | Nucleobase-ascorbate transporter 12                                    | 4.25<br>±3.83            | 7.84<br>±3.96      | 0.23<br>±0.01  | 0.37<br>±0.1  | 0.56<br>±0.1           | 12.39<br>±0.68     | 0.35<br>±0.1   | 0.37<br>±0.02 |
| <i>Phvul.011G138600</i> | Anthocyanidin 3- <i>O</i> -glucoside 2"- <i>O</i> -glucosyltransferase | 9.09<br>±8.57            | 22.87<br>±12.41    | 0.09<br>±0.05  | 0.1<br>±0     | 0.55<br>±0.08          | 35.3<br>±2.56      | 0.23<br>±0.06  | 0.14<br>±0    |
| <i>Phvul.011G163100</i> | Methyltransferase-like protein 20                                      | 3.19<br>±2.89            | 4.79<br>±2.41      | 0.49<br>±0.06  | 0.4<br>±0.08  | 0.37<br>±0.11          | 6.83<br>±2.1       | 0.34<br>±0.18  | 0.72<br>±0.25 |
| XLOC_006186             | No functional annotation                                               | 2.82<br>±2.62            | 7.26<br>±1.94      | 0<br>±0        | 0<br>±0       | 0<br>±0                | 10.03<br>±1.86     | 0<br>±0        | 0<br>±0       |

**Table S19. Transcript abundance for genes upregulated in the CBB-resistant RIL and the CBB-susceptible RIL at 0 h post-inoculation (PI) with *Xanthomonas axonopodis* (Xap).** Transcript levels for individual genes corresponding to each RIL/ inoculation treatment/ sampling time PI are represented as FPKM  $\pm$  SE of three experimental replicates.

|                   |                                                                | Transcript levels (FPKM) |             |            |            |                 |              |             |            |
|-------------------|----------------------------------------------------------------|--------------------------|-------------|------------|------------|-----------------|--------------|-------------|------------|
|                   |                                                                | Mock inoculation         |             |            |            | Xap inoculation |              |             |            |
| Gene ID           | Gene Annotation                                                | 0 h PI                   | 8 h PI      | 24 h PI    | 48 h PI    | 0 h PI          | 8 h PI       | 24 h PI     | 48 h PI    |
| CBB-resistant RIL |                                                                |                          |             |            |            |                 |              |             |            |
| Phvul.001G157500  | Prenylated RAB acceptor 1-related                              | 4.13 ± 1.36              | 4.92 ±1.11  | 0.8 ±0.12  | 0.42 ±0.05 | 17.7 ±4.15      | 6.11 ±3.13   | 0.59 ±0.03  | 0.4 ±0.05  |
| Phvul.002G077400  | Glycosyltransferase 8 domain-containing protein                | 18.37 ± 3.15             | 16.06 ±2.06 | 11.62 ±1.2 | 9.79 ±0.6  | 79.39 ±4.49     | 35.96 ±21.52 | 13.35 ±2.01 | 12.71 ±4.3 |
| Phvul.002G142600  | No functional annotation                                       | 0.5 ± 0.16               | 0.53 ±0.06  | 0.63 ±0.1  | 0.71 ±0.14 | 2.62 ±0.98      | 0.79 ±0.47   | 0.68 ±0.17  | 0.68 ±0.16 |
| Phvul.003G052400  | Xyloglucan endotransglucosylase/ Hydrolase protein 33-related  | 1.8 ± 0.48               | 1.83 ±0.42  | 0.9 ±0.64  | 0.8 ±0.13  | 9.76 ±1.8       | 3.5 ±1.46    | 1.28 ±0.62  | 0.58 ±0.24 |
| Phvul.003G053700  | No functional annotation                                       | 15.23 ± 7.28             | 10.02 ±6.14 | 4.7 ±2.22  | 3.65 ±2.41 | 77.08 ±15.07    | 17.73 ±14.67 | 4.21 ±1.63  | 2.13 ±1.2  |
| Phvul.003G137600  | Xyloglucan:xyloglucosyl transferase                            | 5.41 ± 2.91              | 5.45 ±2.22  | 8.27 ±5.31 | 6.26 ±1.05 | 32.13 ±6.5      | 9.41 ±5.78   | 7.95 ±2.12  | 8.15 ±0.85 |
| Phvul.003G147600  | Xyloglucan endotransglucosylase / Hydrolase protein 25-related | 0.8 ± 0.06               | 1.13 ±0.42  | 0.52 ±0.25 | 0.47 ±0.15 | 11.91 ±4.18     | 4.17 ±2.98   | 0.96 ±0.44  | 1.03 ±0.83 |
| Phvul.003G147700  | Xyloglucan endotransglucosylase/ hydrolase protein 25-related  | 7.13 ± 3.17              | 15.38 ±5.48 | 6.94 ±6.66 | 0.67 ±0.21 | 68.16 ±9.84     | 25.49 ±10.15 | 2.37 ±1.37  | 1.07 ±0.4  |
| Phvul.003G205700  | Plant protein of unknown function                              | 1.14 ± 0.31              | 1.11 ±0.36  | 1.11 ±0.21 | 1.06 ±0.18 | 5.45 ±0.78      | 1.95 ±1.11   | 1.14 ±0.08  | 0.59 ±0.21 |

Table S19 continued

| Gene ID                 | Gene Annotation                                       | Transcript levels (FPKM) |                 |                 |                |                  |                  |                |                |
|-------------------------|-------------------------------------------------------|--------------------------|-----------------|-----------------|----------------|------------------|------------------|----------------|----------------|
|                         |                                                       | Mock inoculation         |                 |                 |                | Xap inoculation  |                  |                |                |
|                         |                                                       | 0 h PI                   | 8 h PI          | 24 h PI         | 48 h PI        | 0 h PI           | 8 h PI           | 24 h PI        | 48 h PI        |
| <i>Phvul.003G238200</i> | Lysine-rich arabinogalactan protein 17-related        | 119.22<br>±42.68         | 94.18<br>±35.61 | 38.48<br>±10.12 | 28.2<br>±4.76  | 477.75<br>±77.64 | 165.36<br>±97.56 | 47.37<br>±8.63 | 14.72<br>±2.98 |
| <i>Phvul.005G084800</i> | No functional annotation                              | 8.36 ±<br>1.96           | 6.65<br>±0.95   | 5.89<br>±0.54   | 8.47<br>±0.97  | 36.09<br>±2.68   | 15.69<br>±10.9   | 8.54<br>±0.48  | 8.79<br>±2.52  |
| <i>Phvul.005G099500</i> | Fasciclin-like arabinogalactan protein 13-related     | 31.25<br>±15.62          | 25.2<br>±8.07   | 9.81<br>±6.34   | 3.75<br>±0.75  | 152.7<br>±18.65  | 53.35<br>±33.94  | 6.03<br>±2.16  | 2.25<br>±0.54  |
| <i>Phvul.007G110600</i> | Phosphate-induced protein 1 conserved region          | 24.39<br>± 6.67          | 24.71<br>±3.24  | 10.77<br>±4.52  | 8.86<br>±1.25  | 129.74<br>±24.32 | 48.91<br>±26.67  | 10.04<br>±1.69 | 5.77<br>±1.59  |
| <i>Phvul.007G186500</i> | Protein NDRG1                                         | 12.49<br>± 6.91          | 11.65<br>±4.1   | 5.58<br>±3.73   | 2.76<br>±0.59  | 56.73<br>±8.97   | 15.46<br>±9.08   | 3.38<br>±1.03  | 1.56<br>±0.52  |
| <i>Phvul.007G215200</i> | T14P4.7 Protein                                       | 5.58 ±<br>0.96           | 6.66<br>±0.66   | 2.57<br>±0.36   | 2.26<br>±0.12  | 36.17<br>±9.53   | 11.07<br>±5.4    | 2.57<br>±0.46  | 2.66<br>±0.57  |
| <i>Phvul.008G175700</i> | Phosphate-induced protein 1 protein, putative-related | 1.11 ±<br>0.42           | 0.95<br>±0.28   | 0.58<br>±0.21   | 0.92<br>±0.2   | 7.23<br>±1.61    | 3.67<br>±2.93    | 1.17<br>±0.42  | 0.95<br>±0.7   |
| <i>Phvul.009G032100</i> | Phosphate-induced protein 1 protein, putative-related | 6.63 ±<br>1.36           | 10.4<br>±2.92   | 5.56<br>±2.36   | 6.44<br>±1.02  | 39.58<br>±10.76  | 15.06<br>±5.11   | 6.64<br>±2.47  | 6.48<br>±0.31  |
| <i>Phvul.009G173000</i> | Plant protein of unknown function                     | 1.52 ±<br>0.37           | 1.98<br>±0.35   | 1<br>±0.26      | 0.65<br>±0.16  | 6.96<br>±1.42    | 2.9<br>±1.02     | 0.89<br>±0.12  | 0.55<br>±0.23  |
| <i>Phvul.009G180401</i> | No functional annotation                              | 24.48<br>± 5.81          | 28.35<br>±3.88  | 10.49<br>±5.7   | 13.65<br>±1.87 | 118.55<br>±13.45 | 55.15<br>±27.47  | 13.86<br>±2.94 | 11.76<br>±0.96 |
| <i>Phvul.011G024801</i> | Expansin-like A1-related                              | 12.74<br>± 2.3           | 14.6<br>±1.08   | 7.36<br>±2.22   | 8.12<br>±0.57  | 90.05<br>±9.32   | 37.46<br>±22.68  | 16.41<br>±5.03 | 15.99<br>±6.32 |
| <i>Phvul.011G055600</i> | No functional annotation                              | 3.7<br>± 1.33            | 2.11<br>±0.57   | 4.04<br>±0.5    | 4.4<br>±0.35   | 16.08<br>±3.42   | 4.51<br>±2.81    | 6.76<br>±1.88  | 3.9<br>±1.13   |
| <i>Phvul.011G214200</i> | AXI 1 protein-like protein                            | 1.22<br>± 0.45           | 1.13<br>±0.21   | 1.16<br>±0.55   | 1.25<br>±0.14  | 8.41<br>±1.14    | 2.92<br>±2       | 2.86<br>±1.25  | 4.6<br>±2.78   |

Table S19 continued

Table S13 continued

| Gene ID             | Gene Annotation                                                       | Transcript levels (FPKM) |                |                 |                |                   |                |                |                |
|---------------------|-----------------------------------------------------------------------|--------------------------|----------------|-----------------|----------------|-------------------|----------------|----------------|----------------|
|                     |                                                                       | Mock inoculation         |                |                 |                | Xap inoculation   |                |                |                |
|                     |                                                                       | 0 h PI                   | 8 h PI         | 24 h PI         | 48 h PI        | 0 h PI            | 8 h PI         | 24 h PI        | 48 h PI        |
| CBB-susceptible RIL |                                                                       |                          |                |                 |                |                   |                |                |                |
| Phvul.001G157500    | Prenylated RAB acceptor 1-related                                     | 1.59<br>±0.38            | 3.17<br>±0.29  | 0.59<br>±0.05   | 0.48<br>±0.15  | 7.08<br>±3.18     | 2.64<br>±0.32  | 0.49<br>±0.25  | 0.98<br>±0.46  |
| Phvul.002G077400    | Glycosyltransferase 8 domain-containing protein                       | 14.98<br>±1.7            | 13.44<br>±0.69 | 11.34<br>±0.62  | 10.22<br>±1.4  | 78.62<br>±9.1     | 14.98<br>±1.61 | 10.08<br>±1.33 | 13.56<br>±3.01 |
| Phvul.002G142600    | No functional annotation                                              | 0.67<br>±0.15            | 0.58<br>±0.06  | 0.54<br>±0.19   | 0.58<br>±0.16  | 4.38<br>±1.88     | 0.46<br>±0.05  | 0.86<br>±0.1   | 0.71<br>±0.29  |
| Phvul.003G052400    | Xyloglucan endotransglucosylase/ Hydrolase protein 33-related         | 1.28<br>±0.18            | 1<br>±0.02     | 1.05<br>±0.42   | 0.52<br>±0.2   | 14.05<br>±6.65    | 1.33<br>±0.22  | 0.99<br>±0.28  | 1.58<br>±1     |
| Phvul.003G053700    | No functional annotation                                              | 6.85<br>±2.68            | 3.72<br>±0.4   | 3.56<br>±1.15   | 3.08<br>±1.82  | 55.77<br>±16.33   | 1.59<br>±0.59  | 2.07<br>±0.69  | 6.55<br>±2.48  |
| Phvul.003G137600    | Xyloglucan:xyloglucosyl transferase / Xyloglucan endotransglycosylase | 4.49<br>±1.44            | 3.04<br>±0.66  | 5.42<br>±1.81   | 4.69<br>±1.11  | 29.24<br>±12.62   | 2.8<br>±0.12   | 4.32<br>±0.64  | 6.07<br>±2.86  |
| Phvul.003G147600    | Xyloglucan endotransglucosylase/hydr olase protein 25-related         | 0.48<br>±0.36            | 0.94<br>±0.08  | 0.27<br>±0.1    | 0.39<br>±0.23  | 9.75<br>±3.41     | 0.83<br>±0.2   | 0.13<br>±0.03  | 1.23<br>±1.03  |
| Phvul.003G147700    | Xyloglucan endotransglucosylase/hydr olase protein 25-related         | 4.87<br>±3.89            | 14.79<br>±2.47 | 1.02<br>±0.63   | 0.78<br>±0.35  | 60.41<br>±32.59   | 19.46<br>±4.54 | 0.33<br>±0.08  | 1.55<br>±1.22  |
| Phvul.003G205700    | Plant protein of unknown function                                     | 1.21<br>±0.35            | 0.67<br>±0.09  | 1.66<br>±0.22   | 1.11<br>±0.09  | 5.43<br>±0.58     | 0.8<br>±0.1    | 1.71<br>±0.1   | 1.03<br>±0.33  |
| Phvul.003G238200    | Lysine-rich arabinogalactan protein 17-related                        | 81.15<br>±12.66          | 52.32<br>±5.65 | 50.42<br>±15.18 | 16.49<br>±2.31 | 448.18<br>±162.03 | 45.52<br>±4.8  | 41.58<br>±4.47 | 48.26<br>±15.5 |
| Phvul.005G084800    | No functional annotation                                              | 6.87<br>±0.57            | 5.76<br>±0.65  | 5.88<br>±0.77   | 7.44<br>±0.62  | 29.93<br>±4.77    | 5.81<br>±0.14  | 5.9<br>±0.33   | 8.61<br>±2.42  |

Table S19 continued

| Gene ID                 | Gene Annotation                                       | Transcript levels (FPKM) |                |               |               |                        |                |               |                |
|-------------------------|-------------------------------------------------------|--------------------------|----------------|---------------|---------------|------------------------|----------------|---------------|----------------|
|                         |                                                       | Mock inoculation         |                |               |               | <i>Xap</i> inoculation |                |               |                |
|                         |                                                       | 0 h PI                   | 8 h PI         | 24 h PI       | 48 h PI       | 0 h PI                 | 8 h PI         | 24 h PI       | 48 h PI        |
| <i>Phvul.005G099500</i> | Fasciclin-like arabinogalactan protein 13-related     | 11.68<br>±2.78           | 10.84<br>±1.84 | 5.88<br>±3.34 | 1.67<br>±0.45 | 121.41<br>±56.13       | 10.32<br>±1.85 | 3.91<br>±0.99 | 4.95<br>±1.87  |
| <i>Phvul.007G110600</i> | Phosphate-induced protein 1 conserved region          | 16.55<br>±2.49           | 20.82<br>±0.91 | 7.69<br>±1.12 | 6.4<br>±1.15  | 129.75<br>±29.88       | 20.2<br>±2.74  | 8.63<br>±1.64 | 8.68<br>±3.13  |
| <i>Phvul.007G186500</i> | Protein NDRG1                                         | 5.69<br>±0.99            | 3.63<br>±1.85  | 3.4<br>±1.56  | 1.43<br>±0.31 | 55.95<br>±30.64        | 5.54<br>±0.43  | 2.35<br>±0.13 | 2.55<br>±0.78  |
| <i>Phvul.007G215200</i> | T14P4.7 Protein                                       | 4.36<br>±0.46            | 3.21<br>±1.63  | 2.67<br>±0.62 | 2.19<br>±0.46 | 46.18<br>±25.34        | 5.11<br>±0.44  | 2.28<br>±0.48 | 2.49<br>±0.28  |
| <i>Phvul.008G175700</i> | Phosphate-induced protein 1 protein, putative-related | 0.54<br>±0.23            | 0.4<br>±0.23   | 0.38<br>±0.17 | 0.81<br>±0.34 | 5.16<br>±1.26          | 0.64<br>±0.18  | 0.31<br>±0.1  | 1.41<br>±0.83  |
| <i>Phvul.009G032100</i> | Phosphate-induced protein 1 protein, putative-related | 6.13<br>±2.57            | 8.84<br>±4.42  | 3.79<br>±1.3  | 2.2<br>±0.43  | 44.35<br>±14.54        | 14.04<br>±1.14 | 3.69<br>±0.43 | 4.62<br>±1.17  |
| <i>Phvul.009G173000</i> | Plant protein of unknown function                     | 1.21<br>±0.35            | 0.94<br>±0.48  | 0.73<br>±0.17 | 0.63<br>±0.18 | 7.26<br>±1.45          | 1.82<br>±0.19  | 0.8<br>±0.09  | 0.66<br>±0.25  |
| <i>Phvul.009G180401</i> | No functional annotation                              | 14.72<br>±5.68           | 17.23<br>±8.63 | 6.6<br>±1.76  | 7.88<br>±1.11 | 101.24<br>±16.05       | 32.66<br>±3.07 | 9.12<br>±1.47 | 9.86<br>±1.52  |
| <i>Phvul.011G024801</i> | Expansin-like A1-related                              | 8.57<br>±1.7             | 8.74<br>±4.63  | 7.46<br>±1.13 | 9.51<br>±3.99 | 78.03<br>±18.75        | 13.97<br>±0.5  | 7.28<br>±0.73 | 15.43<br>±8.07 |
| <i>Phvul.011G055600</i> | No functional annotation                              | 2.46<br>±0.62            | 1.08<br>±0.55  | 2.3<br>±0.17  | 2.11<br>±0.4  | 14.09<br>±5.1          | 1.54<br>±0.21  | 2.27<br>±0.13 | 5.84<br>±3.59  |
| <i>Phvul.011G214200</i> | AXI 1 protein-like protein                            | 0.91<br>±0.12            | 0.48<br>±0.25  | 0.81<br>±0.13 | 1.99<br>±1.13 | 7.93<br>±3.03          | 0.76<br>±0.07  | 0.86<br>±0.18 | 2.36<br>±1.41  |

**Table S20. Transcript abundance for a gene upregulated in the CBB-resistant RIL at 0 h post-inoculation (PI) with *Xanthomonas axonopodis* (Xap) and 8 h thereafter.** Transcript levels for individual genes corresponding to each RIL/ inoculation treatment/ sampling time PI are represented as FPKM  $\pm$  SE of three experimental replicates.

|                         |                                                               | Transcript levels (FPKM) |                    |                    |                    |                    |                    |                    |                    |
|-------------------------|---------------------------------------------------------------|--------------------------|--------------------|--------------------|--------------------|--------------------|--------------------|--------------------|--------------------|
| Gene ID                 | Gene Annotation                                               | Mock inoculation         |                    |                    |                    | Xap inoculation    |                    |                    |                    |
|                         |                                                               | 0 h PI                   | 8 h PI             | 24 h PI            | 48 h PI            | 0 h PI             | 8 h PI             | 24 h PI            | 48 h PI            |
| <i>Phvul.003G147400</i> | Xyloglucan endotransglucosylase/ Hydrolase protein 25-related | 1.06<br>$\pm 0.5$        | 0.12<br>$\pm 0.07$ | 0.12<br>$\pm 0.07$ | 0.33<br>$\pm 0.09$ | 4.94<br>$\pm 0.83$ | 2.38<br>$\pm 1.98$ | 0.48<br>$\pm 0.27$ | 0.91<br>$\pm 0.55$ |

**Table S21. Transcript abundance for a gene downregulated in the CBB-resistant RIL at 0 h post-inoculation (PI) with *Xanthomonas axonopodis* (Xap) and upregulated 24 h thereafter.**

Transcript levels for individual genes corresponding to each RIL/ inoculation treatment/ sampling time PI are represented as FPKM  $\pm$  SE of three experimental replicates.

|                         |                          | Transcript levels (FPKM) |           |           |                 |                 |           |                |                 |
|-------------------------|--------------------------|--------------------------|-----------|-----------|-----------------|-----------------|-----------|----------------|-----------------|
| Gene ID                 | Gene Annotation          | Mock inoculation         |           |           |                 | Xap inoculation |           |                |                 |
|                         |                          | 0 h PI                   | 8 h PI    | 24 h PI   | 48 h PI         | 0 h PI          | 8 h PI    | 24 h PI        | 48 h PI         |
| <i>Phvul.001G158300</i> | No functional annotation | 6.37 $\pm$ 1.84          | 0 $\pm$ 0 | 0 $\pm$ 0 | 6.18 $\pm$ 2.15 | 0 $\pm$ 0       | 0 $\pm$ 0 | 7.3 $\pm$ 4.25 | 19.4 $\pm$ 9.54 |

**Table S22. Transcript abundance for genes downregulated in the CBB-resistant RIL at 0 h post-inoculation (PI) with *Xanthomonas axonopodis* (Xap) and upregulated 48 h PI.** Transcript levels for individual genes corresponding to each RIL/ inoculation treatment/ sampling time PI are represented as FPKM  $\pm$  SE of three experimental replicates.

| Gene ID                 | Gene Annotation                                              | Transcript levels (FPKM) |                     |                    |                    |                    |                     |                     |                       |
|-------------------------|--------------------------------------------------------------|--------------------------|---------------------|--------------------|--------------------|--------------------|---------------------|---------------------|-----------------------|
|                         |                                                              | Mock inoculation         |                     |                    |                    | Xap inoculation    |                     |                     |                       |
|                         |                                                              | 0 h PI                   | 8 h PI              | 24 h PI            | 48 h PI            | 0 h PI             | 8 h PI              | 24 h PI             | 48 h PI               |
| <i>Phvul.001G040300</i> | L-type lectin-domain containing receptor kinase ix.1-related | 2.8<br>$\pm 2.21$        | 2.97<br>$\pm 1.09$  | 0.65<br>$\pm 0.05$ | 0.9<br>$\pm 0.23$  | 0.55<br>$\pm 0.24$ | 2.9<br>$\pm 1$      | 1.32<br>$\pm 0.31$  | 6.13<br>$\pm 1.44$    |
| <i>Phvul.001G075400</i> | Protein phosphatase 2                                        | 13.09<br>$\pm 5.61$      | 10.89<br>$\pm 5.63$ | 3.93<br>$\pm 1.8$  | 4.9<br>$\pm 4.31$  | 3.02<br>$\pm 0.79$ | 10.75<br>$\pm 3.13$ | 3.23<br>$\pm 0.77$  | 54.08<br>$\pm 36.1$   |
| <i>Phvul.001G145900</i> | Dirigent protein 1-related                                   | 1.32<br>$\pm 0.9$        | 1.71<br>$\pm 0.85$  | 1.54<br>$\pm 0.62$ | 2.09<br>$\pm 0.57$ | 0<br>$\pm 0$       | 1.69<br>$\pm 0.71$  | 2.98<br>$\pm 1.12$  | 34.15<br>$\pm 2.4$    |
| <i>Phvul.003G009200</i> | Cytochrome P450                                              | 0.66<br>$\pm 0.39$       | 0.91<br>$\pm 0.33$  | 0.19<br>$\pm 0.05$ | 0.24<br>$\pm 0.06$ | 0.11<br>$\pm 0.02$ | 0.89<br>$\pm 0.28$  | 0.34<br>$\pm 0.05$  | 3.91<br>$\pm 0.63$    |
| <i>Phvul.004G138500</i> | Trypsin and protease inhibitor                               | 7.43<br>$\pm 5.58$       | 10.07<br>$\pm 3.69$ | 2.1<br>$\pm 0.55$  | 0.87<br>$\pm 0.38$ | 1.56<br>$\pm 0.36$ | 8.03<br>$\pm 3.35$  | 3.85<br>$\pm 1.67$  | 8.75<br>$\pm 4.77$    |
| <i>Phvul.010G063900</i> | Dirigent protein 19                                          | 10.25<br>$\pm 5.71$      | 9.19<br>$\pm 1.45$  | 9.47<br>$\pm 3.86$ | 11.81<br>$\pm 2.6$ | 1.74<br>$\pm 0.35$ | 10.74<br>$\pm 3.74$ | 19.77<br>$\pm 3.45$ | 198.38<br>$\pm 17.65$ |
| <i>Phvul.011G203450</i> | VQ motif                                                     | 1.13<br>$\pm 0.31$       | 0.43<br>$\pm 0.12$  | 0.77<br>$\pm 0.25$ | 1.2<br>$\pm 0.71$  | 0<br>$\pm 0$       | 1.38<br>$\pm 0.38$  | 3.33<br>$\pm 2.22$  | 31.48<br>$\pm 4.47$   |



**Table S23. Transcript abundance for a gene downregulated in the CBB-resistant RIL at 0 h post-inoculation (PI) with *Xanthomonas axonopodis* (Xap) and upregulated in the CBB-susceptible RIL 24 h PI.** Transcript levels for individual genes corresponding to each RIL/ inoculation treatment/ sampling time PI are represented as FPKM  $\pm$  SE of three experimental replicates.

|                     |                             | Transcript levels (FPKM) |                  |                |                |                 |                  |                 |                |
|---------------------|-----------------------------|--------------------------|------------------|----------------|----------------|-----------------|------------------|-----------------|----------------|
|                     |                             | Mock inoculation         |                  |                |                | Xap inoculation |                  |                 |                |
| Gene ID             | Gene Annotation             | 0 h PI                   | 8 h PI           | 24 h PI        | 48 h PI        | 0 h PI          | 8 h PI           | 24 h PI         | 48 h PI        |
| CBB-resistant RIL   |                             |                          |                  |                |                |                 |                  |                 |                |
| Phvul.003G295200    | Carboxylesterase 12-related | 78.58<br>±66.05          | 112.75<br>±44.92 | 13.62<br>±0.54 | 26.22<br>±5.24 | 13.97<br>±1.39  | 105.44<br>±45.14 | 21.94<br>±3.37  | 70.05<br>±16.1 |
| CBB-susceptible RIL |                             |                          |                  |                |                |                 |                  |                 |                |
| Phvul.003G295200    | Carboxylesterase 12-related | 28.9<br>±11.37           | 81.91<br>±18.31  | 5.2<br>±1.15   | 53.37<br>±7.86 | 8.12<br>±2.33   | 69.48<br>±6.99   | 28.54<br>±18.45 | 16.14<br>±6.84 |

**Table S24. Transcript abundance for a gene downregulated in the CBB-resistant RIL at 0 h post-inoculation (PI) with *Xanthomonas axonopodis* (Xap) and upregulated in the CBB-susceptible RIL 48 h PI.** Transcript levels for individual genes corresponding to each RIL/ inoculation treatment/ sampling time PI are represented as FPKM  $\pm$  SE of three experimental replicates.

|                     |                          | Transcript levels (FPKM) |                   |                   |                 |                 |                  |                  |                |
|---------------------|--------------------------|--------------------------|-------------------|-------------------|-----------------|-----------------|------------------|------------------|----------------|
|                     |                          | Mock inoculation         |                   |                   |                 | Xap inoculation |                  |                  |                |
| Gene ID             | Gene Annotation          | 0 h PI                   | 8 h PI            | 24 h PI           | 48 h PI         | 0 h PI          | 8 h PI           | 24 h PI          | 48 h PI        |
| CBB-resistant RIL   |                          |                          |                   |                   |                 |                 |                  |                  |                |
| Phvul.010G144300    | Acid phosphatase-related | 139.23<br>±138.44        | 131.59<br>±106.68 | 381.59<br>±225.37 | 79.13<br>±69.37 | 0.6<br>±0.32    | 123.69<br>±92.98 | 249.52<br>±63.65 | 20.73<br>±5.36 |
| CBB-susceptible RIL |                          |                          |                   |                   |                 |                 |                  |                  |                |
| Phvul.010G144300    | Acid phosphatase-related | 6.62<br>±3.61            | 20.28<br>±13.99   | 25.84<br>±17.65   | 3.17<br>±2.33   | 2.82<br>±2.34   | 39.78<br>±3.48   | 16.64<br>±7.63   | 20.68<br>±2.73 |

**Table S25. Transcript abundance for a gene downregulated in the CBB-resistant RIL at 0 h post-inoculation (PI) with *Xanthomonas axonopodis* (Xap) and upregulated 24 and 48 h PI.** Transcript levels for individual genes corresponding to each RIL/ inoculation treatment/ sampling time PI are represented as FPKM  $\pm$  SE of three experimental replicates.

| Gene ID                                              | Gene Annotation           | Transcript levels (FPKM) |                    |                   |                |                        |                    |                    |                     |
|------------------------------------------------------|---------------------------|--------------------------|--------------------|-------------------|----------------|------------------------|--------------------|--------------------|---------------------|
|                                                      |                           | Mock inoculation         |                    |                   |                | <i>Xap</i> inoculation |                    |                    |                     |
|                                                      |                           | 0 h PI                   | 8 h PI             | 24 h PI           | 48 h PI        | 0 h PI                 | 8 h PI             | 24 h PI            | 48 h PI             |
| <i>Phvul.008G287200</i> ,<br><i>Phvul.008G287300</i> | 6'-Deoxychalcone synthase | 1.24 $\pm$<br>1.15       | 1.65 $\pm$<br>0.35 | 0.5 $\pm$<br>0.18 | 1<br>$\pm$ 0.4 | 0.2 $\pm$<br>0.07      | 1.95 $\pm$<br>0.94 | 2.49 $\pm$<br>1.14 | 27.17 $\pm$<br>2.45 |

**Table S26. Transcript abundance for genes upregulated in both RILs at 0 h post-inoculation (PI) with *Xanthomonas axonopodis* (Xap), and 8 h PI in the CBB-resistant RIL.** Transcript levels for individual genes corresponding to each RIL/ inoculation treatment/ sampling time PI are represented as FPKM  $\pm$  SE of three experimental replicates.

|                                                            |                                                                  | Transcript levels (FPKM) |                |               |               |                 |                  |                 |                 |
|------------------------------------------------------------|------------------------------------------------------------------|--------------------------|----------------|---------------|---------------|-----------------|------------------|-----------------|-----------------|
|                                                            |                                                                  | Mock inoculation         |                |               |               | Xap inoculation |                  |                 |                 |
| Gene ID                                                    | Gene Annotation                                                  | 0 h PI                   | 8 h PI         | 24 h PI       | 48 h PI       | 0 h PI          | 8 h PI           | 24 h PI         | 48 h PI         |
| CBB-resistant RIL                                          |                                                                  |                          |                |               |               |                 |                  |                 |                 |
| Phvul.002G122200                                           | Absciscic acid 8'-hydroxylase 1-related                          | 5.74<br>±3.05            | 2.31<br>±1.51  | 3.34<br>±0.74 | 4.18<br>±1.4  | 53.7<br>±10.28  | 16.42<br>±15.09  | 8.61<br>±3.63   | 8.53<br>±4.9    |
| Phvul.002G231500,<br>Phvul.002G231700                      | 17.6 kDa class I heat shock protein 1-related                    | 7.13<br>±1.33            | 5.7<br>±0.7    | 8.83<br>±1.2  | 8.82<br>±1.52 | 71.49<br>±40.11 | 27.17<br>±20.85  | 9.87<br>±0.62   | 14.06<br>±4.53  |
| Phvul.002G049700                                           | F2J10.8 protein-related                                          | 13.14<br>±3.58           | 9.96<br>±2.55  | 5.84<br>±1.51 | 5.35<br>±0.57 | 189.17<br>±29.9 | 70.09<br>±63.58  | 7.07<br>±1.81   | 6.1<br>±2.72    |
| Phvul.003G147500                                           | Xyloglucan endotransglucosylase/<br>Hydrolase protein 25-related | 1.23<br>±0.54            | 0.44<br>±0.31  | 0.13<br>±0.06 | 0.31<br>±0.24 | 18.75<br>±4.31  | 6.79<br>±6.55    | 1.22<br>±0.44   | 1.35<br>±0.87   |
| Phvul.004G044100                                           | ATP-dependent CLP protease<br>ATP-binding subunit CLPB           | 1.07<br>±0.28            | 0.64<br>±0.06  | 1.97<br>±0.14 | 2.55<br>±0.35 | 11.99<br>±6.6   | 4.15<br>±3.54    | 2.51<br>±0.28   | 2.29<br>±0.49   |
| Phvul.005G111100                                           | No functional annotation                                         | 9.27<br>±4.19            | 5.48<br>±3.76  | 4.37<br>±0.83 | 2.77<br>±0.11 | 87.19<br>±6.85  | 25.68<br>±24.16  | 4.88<br>±0.5    | 2.16<br>±0.17   |
| Phvul.008G016500,<br>Phvul.008G016600                      | IQ calmodulin-binding motif<br>/ BAG domain                      | 3.67<br>±1.84            | 1.41<br>±0.5   | 4.02<br>±0.34 | 4.6<br>±0.98  | 60.8<br>±31.89  | 21.84<br>±20.7   | 5.08<br>±0.76   | 5.43<br>±0.96   |
| Phvul.008G175800,<br>Phvul.008G175900,<br>Phvul.008G176000 | Cysteine-rich receptor-like<br>protein kinase 28-related         | 28.97<br>±11.9           | 12.23<br>±4.77 | 8.62<br>±2.74 | 9.86<br>±4.05 | 260.69<br>±43.9 | 109.18<br>±101.5 | 23.08<br>±10.42 | 28.77<br>±21.06 |
| Phvul.009G152500                                           | 17.6 kDa class I heat shock<br>protein 1-related                 | 1.96<br>±0.76            | 0.59<br>±0.21  | 2.02<br>±0.4  | 1.25<br>±0.15 | 17.66<br>±8.45  | 5.56<br>±5.25    | 2.84<br>±0.99   | 2.95<br>±0.62   |
| Phvul.010G125400                                           | Auxin responsive protein                                         | 0.6<br>±0.22             | 0.5<br>±0.16   | 0.22<br>±0.09 | 0.29<br>±0.06 | 11.99<br>±3.85  | 3.84<br>±3.39    | 0.23<br>±0.06   | 0.24<br>±0.12   |

Table S26 continued

|                                                            |                                                               | Transcript levels (FPKM) |                |                |                 |                   |                |                |                  |
|------------------------------------------------------------|---------------------------------------------------------------|--------------------------|----------------|----------------|-----------------|-------------------|----------------|----------------|------------------|
|                                                            |                                                               | Mock inoculation         |                |                |                 | Xap inoculation   |                |                |                  |
| Gene ID                                                    | Gene Annotation                                               | 0 h PI                   | 8 h PI         | 24 h PI        | 48 h PI         | 0 h PI            | 8 h PI         | 24 h PI        | 48 h PI          |
| CBB-susceptible RIL                                        |                                                               |                          |                |                |                 |                   |                |                |                  |
| Phvul.002G122200                                           | Abscisic acid 8'-hydroxylase 1-related                        | 3.08<br>± 1.15           | 0.74<br>± 0.06 | 3.45<br>± 0.52 | 7.89<br>± 4.41  | 58.93<br>± 13.59  | 1.1<br>± 0.12  | 3.34<br>± 0.28 | 11.08<br>± 7     |
| Phvul.002G231500,<br>Phvul.002G231700                      | 17.6 kDa class I heat shock protein 1-related                 | 6.16<br>± 0.33           | 6.15<br>± 0.62 | 5.8<br>± 0.91  | 5.9<br>± 0.12   | 36.48<br>± 27.78  | 7.38<br>± 0.5  | 4.99<br>± 0.64 | 5.62<br>± 0.38   |
| Phvul.002G049700                                           | F2J10.8 protein-related                                       | 8.19<br>± 0.41           | 6.53<br>± 0.35 | 5.29<br>± 0.72 | 4.64<br>± 1.28  | 186.16<br>± 24.66 | 6.39<br>± 0.45 | 4.56<br>± 0.95 | 9.73<br>± 5.59   |
| Phvul.003G147500                                           | Xyloglucan endotransglucosylase/ Hydrolase protein 25-related | 0.15<br>± 0.15           | 0.06<br>± 0.03 | 0.11<br>± 0.04 | 0.52<br>± 0.39  | 12.67<br>± 3.09   | 0.08<br>± 0.04 | 0.08<br>± 0.08 | 1.5<br>± 1.11    |
| Phvul.004G044100                                           | ATP-dependent CLP protease ATP-binding subunit CLPB           | 0.9<br>± 0.17            | 0.62<br>± 0.05 | 1.58<br>± 0.18 | 1.5<br>± 0.08   | 6.42<br>± 4.12    | 0.75<br>± 0.05 | 1.49<br>± 0.16 | 1.51<br>± 0.08   |
| Phvul.005G111100                                           | No functional annotation                                      | 5.53<br>± 1.68           | 3.15<br>± 0.23 | 4.08<br>± 0.7  | 3.51<br>± 0.49  | 70.33<br>± 7.1    | 2.67<br>± 0.47 | 4.23<br>± 0.54 | 5.48<br>± 1.11   |
| Phvul.008G016500,<br>Phvul.008G016600                      | IQ calmodulin-binding motif /BAG domain                       | 3.55<br>± 0.91           | 0.97<br>± 0.49 | 3.33<br>± 0.08 | 3.16<br>± 0.33  | 34.26<br>± 20.21  | 1.3<br>± 0.14  | 3.19<br>± 0.66 | 3.65<br>± 0.5    |
| Phvul.008G175800,<br>Phvul.008G175900,<br>Phvul.008G176000 | Cysteine-rich receptor-like protein kinase 28-related         | 18.23<br>± 5.77          | 4.08<br>± 2.04 | 4.97<br>± 1.21 | 13.69<br>± 8.38 | 253.89<br>± 20.92 | 7.23<br>± 1.04 | 5.54<br>± 0.4  | 30.58<br>± 21.82 |
| Phvul.009G152500                                           | 17.6 kDa class I heat shock protein 1-related                 | 1.16<br>± 0.6            | 0.2<br>± 0.12  | 2.08<br>± 0.37 | 1.98<br>± 0.23  | 7.82<br>± 4.9     | 0.71<br>± 0.23 | 2.07<br>± 0.02 | 2.92<br>± 0.66   |
| Phvul.010G125400                                           | Auxin responsive protein                                      | 0.57<br>± 0.33           | 0.46<br>± 0.24 | 0.28<br>± 0.12 | 0.27<br>± 0.09  | 10.87<br>± 0.99   | 0.42<br>± 0.14 | 0.27<br>± 0.08 | 0.31<br>± 0.12   |

**Table S27. Transcript abundance for genes downregulated at 0 h post-inoculation (PI) with *Xanthomonas axonopodis* (Xap) in both RILs and upregulated 48 h PI in the CBB-resistant RIL.** Transcript levels for individual genes corresponding to each RIL/ inoculation treatment/ sampling time PI are represented as FPKM  $\pm$  SE of three experimental replicates.

|                     |                                                | Transcript levels (FPKM) |                   |                  |                  |                 |                  |                  |                   |
|---------------------|------------------------------------------------|--------------------------|-------------------|------------------|------------------|-----------------|------------------|------------------|-------------------|
|                     |                                                | Mock inoculation         |                   |                  |                  | Xap inoculation |                  |                  |                   |
| Gene ID             | Gene Annotation                                | 0 h PI                   | 8 h PI            | 24 h PI          | 48 h PI          | 0 h PI          | 8 h PI           | 24 h PI          | 48 h PI           |
| CBB-resistant RIL   |                                                |                          |                   |                  |                  |                 |                  |                  |                   |
| Phvul.001G145800    | Dirigent protein 1-related                     | 1.91<br>±1.37            | 3.16<br>±1.28     | 2.45<br>±0.53    | 3.06<br>±0.64    | 0.23<br>±0.14   | 3.08<br>±1.3     | 3.81<br>±0.72    | 28.96<br>±2.86    |
| Phvul.002G032866    | Isoflavone reductase                           | 1.2<br>±0.72             | 1.12<br>±0.47     | 1.39<br>±0.7     | 1.55<br>±0.5     | 0.29<br>±0.1    | 1.79<br>±0.85    | 2.9<br>±0.23     | 30.4<br>±2.74     |
| Phvul.003G051700    | Isoflavone synthase                            | 2.28<br>±1.44            | 2.45<br>±0.87     | 3.12<br>±1.45    | 3.09<br>±1.13    | 0.33<br>±0.12   | 3.07<br>±1.42    | 5.66<br>±2.34    | 102.17<br>±4.19   |
| Phvul.003G109100    | Pathogenesis-related protein<br>Bet V I family | 248.26<br>±196.46        | 397.11<br>±159.63 | 117.07<br>±25.98 | 143.12<br>±17.85 | 53.8<br>±13.12  | 500.28<br>±241.6 | 235.87<br>±63.19 | 736.34<br>±116.98 |
| Phvul.006G069300    | Glutamine-dependent<br>asparagine synthetase   | 3.54<br>±2.56            | 5.52<br>±2.42     | 2.08<br>±0.89    | 2.24<br>±0.86    | 0.59<br>±0.27   | 3.51<br>±2.14    | 3.14<br>±1.65    | 17.76<br>±4.93    |
| CBB-susceptible RIL |                                                |                          |                   |                  |                  |                 |                  |                  |                   |
| Phvul.001G145800    | Dirigent protein 1-related                     | 1.76<br>±1.44            | 3.69<br>±0.7      | 1.48<br>±0.15    | 1.79<br>±0.47    | 0.23<br>±0.14   | 3.19<br>±0.3     | 3.11<br>±1.09    | 3.84<br>±0.56     |
| Phvul.002G032866    | Isoflavone reductase                           | 2.35<br>±1.34            | 2.92<br>±0.72     | 0.57<br>±0.17    | 1.08<br>±0.19    | 0.35<br>±0.16   | 2.53<br>±1.13    | 1.21<br>±0.6     | 2.11<br>±0.91     |
| Phvul.003G051700    | Isoflavone synthase                            | 2.62<br>±1.39            | 5<br>±1.15        | 0.63<br>±0.1     | 1.38<br>±0.48    | 0.59<br>±0.23   | 2.01<br>±0.8     | 2.15<br>±1.13    | 3.97<br>±2.03     |
| Phvul.003G109100    | Pathogenesis-related protein<br>Bet V I family | 208.02<br>±164.91        | 498.09<br>±37.11  | 94.87<br>±14.26  | 145.84<br>±70.05 | 46.96<br>±3.04  | 390.61<br>±56.52 | 130.24<br>±33.47 | 153.47<br>±49.16  |
| Phvul.006G069300    | Glutamine-dependent<br>asparagine synthetase   | 22.4<br>±15.7            | 47.09<br>±8.23    | 3.68<br>±1.47    | 2.77<br>±1       | 2.4<br>±0.66    | 33.35<br>±16     | 4.03<br>±1.44    | 4.92<br>±1.93     |

**Table S28. Transcript abundance for a gene upregulated in the CBB-resistant and CBB-susceptible RIL at 0 h post-inoculation (PI) with *Xanthomonas axonopodis* (Xap) and downregulated in the CBB-resistant RIL at 24 and 48 h PI.**

Transcript levels for individual genes corresponding to each RIL/ inoculation treatment/ sampling time PI are represented as FPKM  $\pm$  SE of three experimental replicates.

|                     |                                                 | Transcript levels (FPKM) |                |                |                |                 |                |                |                |
|---------------------|-------------------------------------------------|--------------------------|----------------|----------------|----------------|-----------------|----------------|----------------|----------------|
|                     |                                                 | Mock inoculation         |                |                |                | Xap inoculation |                |                |                |
| Gene ID             | Gene Annotation                                 | 0 h PI                   | 8 h PI         | 24 h PI        | 48 h PI        | 0 h PI          | 8 h PI         | 24 h PI        | 48 h PI        |
| CBB-resistant RIL   |                                                 |                          |                |                |                |                 |                |                |                |
| Phvul.009G089300    | Ethylene-responsive transcription factor ERF003 | 3.99<br>± 2.11           | 2.82<br>± 2.17 | 5.67<br>± 4.49 | 1.02<br>± 0.24 | 18.84<br>± 4.02 | 5.28<br>± 4.42 | 1.33<br>± 0.23 | 0.25<br>± 0.13 |
| CBB-susceptible RIL |                                                 |                          |                |                |                |                 |                |                |                |
| Phvul.009G089300    | Ethylene-responsive transcription factor ERF003 | 2.65<br>± 1.14           | 0.89<br>± 0.44 | 5.21<br>± 1.54 | 1.84<br>± 0.57 | 24.52<br>± 6.14 | 1.2<br>± 0.36  | 2.65<br>± 0.51 | 5.29<br>± 2.53 |

**Table S29. Transcript abundance for a gene downregulated in the CBB-resistant RIL at 0 h post-inoculation (PI) with *Xanthomonas axonopodis* (Xap) and upregulated 48 h PI, and downregulated in the CBB-susceptible RIL at 0 h PI and upregulated 24 h PI.** Transcript levels for individual genes corresponding to each RIL/ inoculation treatment/ sampling time PI are represented as FPKM  $\pm$  SE of three experimental replicates.

|                     |                          | Transcript levels (FPKM) |                  |                |                 |                 |                  |                  |                  |
|---------------------|--------------------------|--------------------------|------------------|----------------|-----------------|-----------------|------------------|------------------|------------------|
|                     |                          | Mock inoculation         |                  |                |                 | Xap inoculation |                  |                  |                  |
| Gene ID             | Gene Annotation          | 0 h PI                   | 8 h PI           | 24 h PI        | 48 h PI         | 0 h PI          | 8 h PI           | 24 h PI          | 48 h PI          |
| CBB-resistant RIL   |                          |                          |                  |                |                 |                 |                  |                  |                  |
| Phvul.006G078400    | No functional annotation | 43.71<br>± 41.03         | 43.73<br>± 19.76 | 9.36<br>± 3.59 | 11.85<br>± 2.07 | 3.33<br>± 0.77  | 47.71<br>± 22.29 | 10.49<br>± 2.18  | 69.64<br>± 10.65 |
| CBB-susceptible RIL |                          |                          |                  |                |                 |                 |                  |                  |                  |
| Phvul.006G078400    | No functional annotation | 18.58<br>± 14.84         | 76.27<br>± 27.64 | 3.27<br>± 0.57 | 45.25<br>± 7.56 | 1.99<br>± 0.52  | 43.85<br>± 9.98  | 19.35<br>± 14.73 | 14.14<br>± 9.16  |

**Table S30. Transcript abundance for a gene upregulated in the CBB-resistant RIL at 0 h post-inoculation (PI) with *Xanthomonas axonopodis* (Xap) and at all sampling times thereafter, and upregulated in the CBB-susceptible RIL at 0 h PI.** Transcript levels for individual genes corresponding to each RIL/ inoculation treatment/ sampling time PI are represented as FPKM  $\pm$  SE of three experimental replicates.

|                     |                                                              | Transcript levels (FPKM) |               |               |                 |                 |                |                |                 |
|---------------------|--------------------------------------------------------------|--------------------------|---------------|---------------|-----------------|-----------------|----------------|----------------|-----------------|
|                     |                                                              | Mock inoculation         |               |               |                 | Xap inoculation |                |                |                 |
| Gene ID             | Gene Annotation                                              | 0 h PI                   | 8 h PI        | 24 h PI       | 48 h PI         | 0 h PI          | 8 h PI         | 24 h PI        | 48 h PI         |
| CBB-resistant RIL   |                                                              |                          |               |               |                 |                 |                |                |                 |
| Phvul.008G207300    | Late embryogenesis abundant hydroxyproline-rich glycoprotein | 14.63<br>±4.78           | 6.79<br>±2.11 | 3.51<br>±0.14 | 14.08<br>±10.15 | 58.94<br>±12.31 | 28.52<br>±22.4 | 33.76<br>±16.6 | 61.88<br>±45.85 |
| CBB-susceptible RIL |                                                              |                          |               |               |                 |                 |                |                |                 |
| Phvul.008G207300    | Late embryogenesis abundant hydroxyproline-rich glycoprotein | 7.6<br>±2.92             | 2.2<br>±1.14  | 2.37<br>±1.17 | 33.92<br>±20.27 | 53.87<br>±10.22 | 3.97<br>±0.16  | 2.76<br>±0.37  | 31.96±<br>19.49 |

**Table S31. Transcript abundance for a gene upregulated in the CBB-resistant RIL at 8 h and 48 h post-inoculation (PI) with *Xanthomonas axonopodis* (Xap).** Transcript levels for individual genes corresponding to each RIL/ inoculation treatment/ sampling time PI are represented as FPKM  $\pm$  SE of three experimental replicates.

| Gene ID                 | Gene Annotation              | Transcript levels (FPKM) |                   |                    |                    |                    |                    |                    |                    |
|-------------------------|------------------------------|--------------------------|-------------------|--------------------|--------------------|--------------------|--------------------|--------------------|--------------------|
|                         |                              | Mock inoculation         |                   |                    |                    | Xap inoculation    |                    |                    |                    |
|                         |                              | 0 h PI                   | 8 h PI            | 24 h PI            | 48 h PI            | 0 h PI             | 8 h PI             | 24 h PI            | 48 h PI            |
| <i>Phvul.008G249900</i> | Peroxidase / Lactoperoxidase | 0.41<br>$\pm 0.37$       | 0.24<br>$\pm 0.1$ | 0.43<br>$\pm 0.24$ | 0.27<br>$\pm 0.05$ | 0.14<br>$\pm 0.11$ | 1.07<br>$\pm 0.66$ | 0.93<br>$\pm 0.42$ | 3.85<br>$\pm 0.92$ |

**Table S32. Transcript abundance for a gene downregulated in the CBB-resistant RIL at 8 h post-inoculation (PI) with *Xanthomonas axonopodis* (Xap) and upregulated at 48 h PI.** Transcript levels for individual genes corresponding to each RIL/ inoculation treatment/ sampling time PI are represented as FPKM  $\pm$  SE of three experimental replicates.

| Gene ID                                              | Gene Annotation                                                                                 | Transcript levels (FPKM) |                    |                    |                    |                    |                    |                    |                    |
|------------------------------------------------------|-------------------------------------------------------------------------------------------------|--------------------------|--------------------|--------------------|--------------------|--------------------|--------------------|--------------------|--------------------|
|                                                      |                                                                                                 | Mock inoculation         |                    |                    |                    | Xap inoculation    |                    |                    |                    |
|                                                      |                                                                                                 | 0 h PI                   | 8 h PI             | 24 h PI            | 48 h PI            | 0 h PI             | 8 h PI             | 24 h PI            | 48 h PI            |
| <i>Phvul.009G158300</i> ,<br><i>Phvul.009G158400</i> | Calcium/Calmodulin-<br>dependent protein kinase /<br>Microtubule-associated<br>protein 2 kinase | 4.41<br>$\pm 2.29$       | 4.98<br>$\pm 2.17$ | 0.85<br>$\pm 0.15$ | 0.85<br>$\pm 0.16$ | 4.97<br>$\pm 2.93$ | 1.16<br>$\pm 0.41$ | 2.42<br>$\pm 1.62$ | 3.58<br>$\pm 3.13$ |

**Table S33. Transcript abundance for a gene upregulated in the CBB-resistant RIL at 8 and 48 h post-inoculation (PI) with *Xanthomonas axonopodis* (Xap) and upregulated in the CBB-susceptible RIL at 0 h post-inoculation (PI).** Transcript levels for individual genes corresponding to each RIL/ inoculation treatment/ sampling time PI are represented as FPKM  $\pm$  SE of three experimental replicates.

|                     |                                                           | Transcript levels (FPKM) |               |               |               |                 |               |               |               |
|---------------------|-----------------------------------------------------------|--------------------------|---------------|---------------|---------------|-----------------|---------------|---------------|---------------|
|                     |                                                           | Mock inoculation         |               |               |               | Xap inoculation |               |               |               |
| Gene ID             | Gene Annotation                                           | 0 h PI                   | 8 h PI        | 24 h PI       | 48 h PI       | 0 h PI          | 8 h PI        | 24 h PI       | 48 h PI       |
| CBB-resistant RIL   |                                                           |                          |               |               |               |                 |               |               |               |
| Phvul.004G122000    | Dehydration-responsive element-binding protein 1a-related | 1.42<br>±0.88            | 0.16<br>±0.08 | 0.06<br>±0.06 | 1.65<br>±1.54 | 5.1<br>±2.04    | 2.71<br>±2.64 | 3.57<br>±1.99 | 7.01<br>±5.72 |
| CBB-susceptible RIL |                                                           |                          |               |               |               |                 |               |               |               |
| Phvul.004G122000    | Dehydration-responsive element-binding protein 1a-related | 0.27<br>±0.22            | 0.04<br>±0.03 | 0.04<br>±0.02 | 5.95<br>±4.04 | 5.92<br>±2.74   | 0.07<br>±0.03 | 0.04<br>±0.02 | 4.9<br>±3.52  |



**Table S34. Transcript abundance for genes respectively upregulated and downregulated in the CBB-resistant RIL at 24 and 48 h post-inoculation (PI) with *Xanthomonas axonopodis* (Xap).** Transcript levels for individual genes corresponding to each RIL/ inoculation treatment/ sampling time PI are represented as FPKM  $\pm$  SE of three experimental replicates.

|                                    |                                                                       | Transcript levels (FPKM) |                |                |                 |                 |                 |                |                   |
|------------------------------------|-----------------------------------------------------------------------|--------------------------|----------------|----------------|-----------------|-----------------|-----------------|----------------|-------------------|
| Gene ID                            | Gene Annotation                                                       | Mock inoculation         |                |                |                 | Xap inoculation |                 |                |                   |
|                                    |                                                                       | 0 h PI                   | 8 h PI         | 24 h PI        | 48 h PI         | 0 h PI          | 8 h PI          | 24 h PI        | 48 h PI           |
| Upregulated                        |                                                                       |                          |                |                |                 |                 |                 |                |                   |
| Phvul.001G087100                   | GRAM domain                                                           | 4.89<br>±1.11            | 3.49<br>±1.08  | 3.4<br>±0.14   | 6.09<br>±2.62   | 9.86<br>±1.76   | 5.46<br>±2.11   | 17.87<br>±6.66 | 35.55<br>±22.66   |
| Phvul.001G067400                   | EF-hand calcium-binding domain containing protein                     | 1.61<br>±0.87            | 0.88<br>±0.03  | 0.7<br>±0.16   | 2.57<br>±1.74   | 3.25<br>±0.62   | 2.05<br>±1.13   | 5.26<br>±2.13  | 15.98<br>±9.76    |
| Phvul.001G194700, Phvul.001G194900 | Harpin-induced protein-like-related                                   | 31.28<br>±7.01           | 18.72<br>±6.25 | 11.56<br>±1.56 | 45.65<br>±33.12 | 36.48<br>±5.38  | 30.28<br>±10.12 | 85.5<br>±36.2  | 220.26<br>±116.56 |
| Phvul.002G293000                   | 1-Aminocyclopropane-1-carboxylate synthase 2-related                  | 3.23<br>±0.5             | 2.2<br>±0.62   | 1.42<br>±0.27  | 3.07<br>±2.27   | 3<br>±0.42      | 2.71<br>±0.75   | 7<br>±3.33     | 14.69<br>±7.89    |
| Phvul.005G115200                   | No functional annotation                                              | 2.62<br>±0.29            | 3.77<br>±0.95  | 0.68<br>±0.15  | 1.77<br>±0.48   | 4.16<br>±0.43   | 4.8<br>±0.65    | 3.15<br>±1.11  | 7.59<br>±1.1      |
| Phvul.007G029800                   | Core-2/I-branching β-1,6-N-acetylglucosaminyltransferase-like protein | 0.29<br>±0.08            | 0.14<br>±0.02  | 0.1<br>±0.03   | 0.35<br>±0.2    | 0.08<br>±0.06   | 0.07<br>±0.05   | 0.75<br>±0.33  | 3.05<br>±1.34     |
| Phvul.009G167200                   | No functional annotation                                              | 1.79<br>±0.51            | 0.85<br>±0.19  | 0.83<br>±0.17  | 1.85<br>±1.21   | 0.56<br>±0.24   | 0.86<br>±0.21   | 4.76<br>±2.24  | 9.05<br>±6.09     |
| Phvul.010G090100                   | BON1-associated protein 1-related                                     | 0.52<br>±0.24            | 0.41<br>±0.27  | 2.82<br>±0.71  | 4.02<br>±0.7    | 0.29<br>±0.09   | 0.38<br>±0.09   | 3.89<br>±1.62  | 10.24<br>±5.81    |
| Phvul.010G111900                   | WRKY DNA -binding domain                                              | 11.23<br>±1.74           | 13.44<br>±1.39 | 6.85<br>±2.6   | 11.89<br>±7.04  | 9.7<br>±2.04    | 13.99<br>±1.54  | 20.41<br>±7.32 | 39.81<br>±24.09   |
| XLOC_023351                        | No functional annotation                                              | 5.32<br>±1.92            | 4.22<br>±1.93  | 0.24<br>±0.1   | 0.48<br>±0.2    | 7.24<br>±0.76   | 5.46<br>±1.64   | 12.23<br>±3.35 | 24.96<br>±15.32   |
| XLOC_023352                        | No functional annotation                                              | 20.69<br>±9.43           | 14.41<br>±5.68 | 3.85<br>±0.52  | 9.44<br>±5.06   | 18.01<br>±5.3   | 15.74<br>±4.82  | 34.27<br>±9.71 | 74.15<br>±47.64   |

**Table S34 continued**

|                         |                              | Transcript levels (FPKM) |        |         |         |                        |        |         |         |
|-------------------------|------------------------------|--------------------------|--------|---------|---------|------------------------|--------|---------|---------|
|                         |                              | Mock inoculation         |        |         |         | <i>Xap</i> inoculation |        |         |         |
| Gene ID                 | Gene Annotation              | 0 h PI                   | 8 h PI | 24 h PI | 48 h PI | 0 h PI                 | 8 h PI | 24 h PI | 48 h PI |
|                         |                              |                          |        |         |         |                        |        |         |         |
| Downregulated           |                              |                          |        |         |         |                        |        |         |         |
| <i>Phvul.008G003200</i> | Pollen proteins Ole e I like | 0.02                     | 0.04   | 0.86    | 0.95    | 0.03                   | 0.08   | 0.21    | 0.14    |
|                         |                              | ±0.02                    | ±0.03  | ±0.46   | ±0.46   | ±0.03                  | ±0.05  | ±0.03   | ±0.03   |

**Table S35. Transcript abundance for genes upregulated in the CBB-resistant RIL at 24 h post-inoculation (PI) with *Xanthomonas axonopodis* (Xap) and at 0 h PI in the CBB-susceptible RIL.** Transcript levels for individual genes corresponding to each RIL/ inoculation treatment/ sampling time PI are represented as FPKM  $\pm$  SE of three experimental replicates.

|                     |                            | Transcript levels (FPKM) |                |               |                 |                 |                 |                 |                 |
|---------------------|----------------------------|--------------------------|----------------|---------------|-----------------|-----------------|-----------------|-----------------|-----------------|
|                     |                            | Mock inoculation         |                |               |                 | Xap inoculation |                 |                 |                 |
| Gene ID             | Gene Annotation            | 0 h PI                   | 8 h PI         | 24 h PI       | 48 h PI         | 0 h PI          | 8 h PI          | 24 h PI         | 48 h PI         |
| CBB-resistant RIL   |                            |                          |                |               |                 |                 |                 |                 |                 |
| Phvul.001G212300    | Domain of unknown function | 5.39<br>±2.92            | 1.12<br>±0.44  | 1.42<br>±0.1  | 6.01<br>±4.53   | 6.05<br>±1.16   | 2.62<br>±2.2    | 6.46<br>±3.49   | 12.52<br>±7.42  |
| Phvul.003G066700    | No functional annotation   | 3.34<br>±1.68            | 1.11<br>±0.42  | 0.49<br>±0.3  | 4.35<br>±4.12   | 5.6<br>±1.24    | 4.05<br>±3.09   | 7.08<br>±3.65   | 13.66<br>±9.72  |
| Phvul.005G088600    | Calcium binding protein    | 28.33<br>±9.98           | 13.32<br>±2.59 | 7.18<br>±1.3  | 31.49<br>±25.79 | 67.07<br>±25.89 | 43.22<br>±31.75 | 46.24<br>±21.93 | 95.93<br>±53.37 |
| Phvul.010G062900    | Methyltransferase          | 5.95<br>±2.15            | 3.05<br>±0.7   | 3.69<br>±0.46 | 7.44<br>±3.33   | 21.3<br>±2.99   | 10.71<br>±8.26  | 15.73<br>±6.67  | 22.11<br>±14.65 |
| CBB-susceptible RIL |                            |                          |                |               |                 |                 |                 |                 |                 |
| Phvul.001G212300    | Domain of unknown function | 2.33<br>±0.8             | 0.56<br>±0.28  | 0.97<br>±0.13 | 5.84<br>±4.65   | 9.82<br>±4.09   | 0.56<br>±0.2    | 0.85<br>±0.36   | 9.06<br>±4.82   |
| Phvul.003G066700    | No functional annotation   | 0.7<br>±0.42             | 0.72<br>±0.19  | 0.76<br>±0.13 | 7.4<br>±6.48    | 3.71<br>±0.91   | 0.61<br>±0.04   | 0.55<br>±0.25   | 5.62<br>±2.6    |
| Phvul.005G088600    | Calcium binding protein    | 10.6<br>±4.46            | 7.01<br>±0.48  | 3.89<br>±1.05 | 57.68<br>±36.25 | 64.87<br>±19.05 | 7.99<br>±0.95   | 5.5<br>±1.48    | 43.4<br>±20.55  |
| Phvul.010G062900    | Methyltransferase          | 4.32<br>±1.23            | 1.53<br>±0.8   | 4.04<br>±0.06 | 11.82<br>±7.31  | 23.72<br>±4.99  | 2.64<br>±0.37   | 3.76<br>±0.36   | 18.5<br>±10.78  |

**Table S36. Transcript abundance for genes upregulated in the CBB-resistant RIL at 24 h post-inoculation (PI) with *Xanthomonas axonopodis* (Xap) and in the CBB-susceptible RIL at 48 h PI.** Transcript levels for individual genes corresponding to RIL/ inoculation treatment/ sampling time PI are represented as FPKM  $\pm$  SE of three experimental replicates.

|                     |                                       | Transcript levels (FPKM) |               |               |               |                 |               |               |               |
|---------------------|---------------------------------------|--------------------------|---------------|---------------|---------------|-----------------|---------------|---------------|---------------|
|                     |                                       | Mock inoculation         |               |               |               | Xap inoculation |               |               |               |
| Gene ID             | Gene Annotation                       | 0 h PI                   | 8 h PI        | 24 h PI       | 48 h PI       | 0 h PI          | 8 h PI        | 24 h PI       | 48 h PI       |
| CBB-resistant RIL   |                                       |                          |               |               |               |                 |               |               |               |
| Phvul.003G212700    | AP2 domain                            | 0.12<br>±0.12            | 0<br>±0       | 0<br>±0       | 0<br>±0       | 0<br>±0         | 0.05<br>±0.05 | 0.78<br>±0.47 | 0<br>±0       |
| Phvul.004G011800    | Pectin lyase-like superfamily protein | 0<br>±0                  | 0<br>±0       | 0<br>±0       | 0<br>±0       | 0<br>±0         | 0<br>±0       | 1.48<br>±0.46 | 0.15<br>±0.03 |
| Phvul.007G066520    | AP2 domain                            | 1.67<br>±0.39            | 1.06<br>±0.17 | 0.4<br>±0.16  | 0.5<br>±0.11  | 0.97<br>±0.2    | 0.96<br>±0.05 | 3.6<br>±1.91  | 1.35<br>±1.01 |
| CBB-susceptible RIL |                                       |                          |               |               |               |                 |               |               |               |
| Phvul.003G212700    | AP2 domain                            | 0<br>±0                  | 0.11<br>±0.05 | 0<br>±0       | 0<br>±0       | 0.44<br>±0.44   | 0.09<br>±0.09 | 0.13<br>±0.13 | 1.13<br>±1.13 |
| Phvul.004G011800    | Pectin lyase-like superfamily protein | 0.06<br>±0.03            | 0.02<br>±0.01 | 0.05<br>±0.03 | 0<br>±0       | 0.11<br>±0.11   | 0<br>±0       | 2.09<br>±1.62 | 1.73<br>±1.3  |
| Phvul.007G066520    | AP2 domain                            | 1.22<br>±0.25            | 1.05<br>±0.32 | 0.6<br>±0.14  | 0.63<br>±0.26 | 3.17<br>±2.26   | 0.86<br>±0.07 | 0.38<br>±0.07 | 4.35<br>±3.78 |

**Table S37. Transcript abundance for genes upregulated in the CBB-resistant RIL at 24 and 48 h post-inoculation (PI) with *Xanthomonas axonopodis* (Xap) and at 0 h PI in the CBB-susceptible RIL.** Transcript levels for individual genes corresponding to each RIL/ inoculation treatment/ sampling time PI are represented as FPKM  $\pm$  SE of three experimental replicates.

|                     |                                          | Transcript levels (FPKM) |               |               |                |                 |               |                |                 |
|---------------------|------------------------------------------|--------------------------|---------------|---------------|----------------|-----------------|---------------|----------------|-----------------|
|                     |                                          | Mock inoculation         |               |               |                | Xap inoculation |               |                |                 |
| Gene ID             | Gene Annotation                          | 0 h PI                   | 8 h PI        | 24 h PI       | 48 h PI        | 0 h PI          | 8 h PI        | 24 h PI        | 48 h PI         |
| CBB-resistant RIL   |                                          |                          |               |               |                |                 |               |                |                 |
| Phvul.004G022700    | Galacturonosyltransferase-like 8-related | 0.95<br>±0.33            | 0.35<br>±0.14 | 0.13<br>±0.02 | 0.82<br>±0.73  | 1.88<br>±0.1    | 1<br>±0.61    | 1.98<br>±1.28  | 4.04<br>±2.52   |
| XLOC_009124         | No functional annotation                 | 2<br>±0.88               | 0.79<br>±0.54 | 0.24<br>±0.02 | 4.36<br>±3.98  | 1.57<br>±0.36   | 0.99<br>±0.53 | 12.63<br>±6.81 | 30.37<br>±20.77 |
| XLOC_023518         | No functional annotation                 | 1.85<br>±0.6             | 0.52<br>±0.08 | 0.27<br>±0.09 | 1.14<br>±0.78  | 1.27<br>±0.36   | 1.59<br>±0.86 | 3.57<br>±1.95  | 10.64<br>±7.39  |
| CBB-susceptible RIL |                                          |                          |               |               |                |                 |               |                |                 |
| Phvul.004G022700    | Galacturonosyltransferase-like 8-related | 0.42<br>±0.14            | 0.23<br>±0.03 | 0.21<br>±0.07 | 1.57<br>±1.2   | 2.04<br>±1.13   | 0.17<br>±0.06 | 0.14<br>±0.01  | 1.37<br>±0.84   |
| XLOC_009124         | No functional annotation                 | 0.52<br>±0.21            | 0.27<br>±0.03 | 0.21<br>±0.09 | 15.41<br>±14.6 | 3.36<br>±2.38   | 0.14<br>±0.05 | 0.19<br>±0.05  | 13.3<br>±7.66   |
| XLOC_023518         | No functional annotation                 | 0.68<br>±0.11            | 0.31<br>±0.16 | 0.33<br>±0.02 | 5.11<br>±4.64  | 3.12<br>±1.47   | 0.49<br>±0.07 | 0.27<br>±0.05  | 5.22<br>±3.75   |

**Table S38. Transcript abundance for a gene upregulated in the CBB-resistant RIL at 24 and 48 h post-inoculation (PI) with *Xanthomonas axonopodis* (Xap) and downregulated at 48 h PI in the CBB-susceptible RIL.** Transcript levels for individual genes corresponding to each RIL/ inoculation treatment/ sampling time PI are represented as FPKM  $\pm$  SE of three experimental replicates.

|                     |                                          | Transcript levels (FPKM) |               |               |               |                 |               |               |               |
|---------------------|------------------------------------------|--------------------------|---------------|---------------|---------------|-----------------|---------------|---------------|---------------|
|                     |                                          | Mock inoculation         |               |               |               | Xap inoculation |               |               |               |
| Gene ID             | Gene Annotation                          | 0 h PI                   | 8 h PI        | 24 h PI       | 48 h PI       | 0 h PI          | 8 h PI        | 24 h PI       | 48 h PI       |
| CBB-resistant RIL   |                                          |                          |               |               |               |                 |               |               |               |
| Phvul.002G177900    | Galacturonosyltransferase-like 8-related | 0.1<br>±0.06             | 0.55<br>±0.33 | 0.11<br>±0.02 | 0.25<br>±0.05 | 0.24<br>±0.08   | 0.19<br>±0.1  | 0.62<br>±0.06 | 4.71<br>±1.74 |
| CBB-susceptible RIL |                                          |                          |               |               |               |                 |               |               |               |
| Phvul.002G177900    | Galacturonosyltransferase-like 8-related | 0.19<br>±0.02            | 0.07<br>±0.03 | 0.16<br>±0.04 | 0.68<br>±0.35 | 0.31<br>±0.14   | 0.09<br>±0.02 | 0.06<br>±0.03 | 0.12<br>±0.03 |

**Table S39. Transcript abundance for a gene upregulated in the CBB-resistant RIL at 24 h post-inoculation (PI) with *Xanthomonas axonopodis* (Xap) and in the CBB-susceptible RIL at 24 and 48 h PI.** Transcript levels for individual genes corresponding to each RIL/ inoculation treatment/ sampling time PI are represented as FPKM  $\pm$  SE of three experimental replicates.

|                     |                      | Transcript levels (FPKM) |               |               |               |                 |               |               |                |
|---------------------|----------------------|--------------------------|---------------|---------------|---------------|-----------------|---------------|---------------|----------------|
|                     |                      | Mock inoculation         |               |               |               | Xap inoculation |               |               |                |
| Gene ID             | Gene Annotation      | 0 h PI                   | 8 h PI        | 24 h PI       | 48 h PI       | 0 h PI          | 8 h PI        | 24 h PI       | 48 h PI        |
| CBB-resistant RIL   |                      |                          |               |               |               |                 |               |               |                |
| Phvul.008G144100    | β-expansin 6-related | 0.13<br>±0.13            | 0.02<br>±0.02 | 0.11<br>±0.06 | 0.16<br>±0.09 | 0<br>±0         | 0.08<br>±0.06 | 7.51<br>±1.55 | 0.96<br>±0.19  |
| CBB-susceptible RIL |                      |                          |               |               |               |                 |               |               |                |
| Phvul.008G144100    | β-expansin 6-related | 0.04<br>±0.02            | 0.03<br>±0.03 | 0.2<br>±0.05  | 0.18<br>±0.1  | 0.03<br>±0.02   | 0.05<br>±0.05 | 13.7<br>±9    | 12.07<br>±8.83 |

**Table S40. Transcript abundance for a gene upregulated in both RILs at 24 and 48 h post-inoculation (PI) with *Xanthomonas axonopodis* (Xap).** Transcript levels for individual genes corresponding to each RIL/ inoculation treatment/ sampling time PI are represented as FPKM  $\pm$  SE of three experimental replicates.

|                         |                          | Transcript levels (FPKM) |        |         |         |                        |        |         |         |
|-------------------------|--------------------------|--------------------------|--------|---------|---------|------------------------|--------|---------|---------|
|                         |                          | Mock inoculation         |        |         |         | <i>Xap</i> inoculation |        |         |         |
| Gene ID                 | Gene Annotation          | 0 h PI                   | 8 h PI | 24 h PI | 48 h PI | 0 h PI                 | 8 h PI | 24 h PI | 48 h PI |
| CBB-resistant RIL       |                          |                          |        |         |         |                        |        |         |         |
| <i>Phvul.007G099700</i> | No functional annotation | 0                        | 0.03   | 0.34    | 0.86    | 0.04                   | 0.05   | 17.6    | 22.03   |
|                         |                          | ±0                       | ±0.03  | ±0.12   | ±0.38   | ±0.03                  | ±0.05  | ±5.83   | ±3.6    |
| CBB-susceptible RIL     |                          |                          |        |         |         |                        |        |         |         |
| <i>Phvul.007G099700</i> | No functional annotation | 0                        | 0.05   | 0.32    | 0.16    | 0                      | 0.03   | 29.87   | 15.02   |
|                         |                          | ±0                       | ±0.02  | ±0.2    | ±0      | ±0                     | ±0.02  | ±25.63  | ±11.5   |

**Table S41. Transcript abundance for genes upregulated in the CBB-resistant RIL at 48 h post-inoculation (PI) *Xanthomonas axonopodis* (Xap) and downregulated in the CBB-susceptible RIL at 0 h PI.** Transcript levels for individual genes corresponding to each RIL/ inoculation treatment/ sampling time PI are represented as FPKM  $\pm$  SE of three experimental replicates.

|                                                                                                                           |                                                                      | Transcript levels (FPKM) |               |                |               |                 |                |                |                  |
|---------------------------------------------------------------------------------------------------------------------------|----------------------------------------------------------------------|--------------------------|---------------|----------------|---------------|-----------------|----------------|----------------|------------------|
|                                                                                                                           |                                                                      | Mock inoculation         |               |                |               | Xap inoculation |                |                |                  |
| Gene ID                                                                                                                   | Gene Annotation                                                      | 0 h PI                   | 8 h PI        | 24 h PI        | 48 h PI       | 0 h PI          | 8 h PI         | 24 h PI        | 48 h PI          |
| CBB-resistant RIL                                                                                                         |                                                                      |                          |               |                |               |                 |                |                |                  |
| Phvul.001G145600                                                                                                          | Dirigent protein 1-related                                           | 0.31<br>±0.13            | 0.2<br>±0.12  | 0.71<br>±0.33  | 0.26<br>±0.13 | 0.14<br>±0.1    | 0.32<br>±0.2   | 1.94<br>±1.4   | 8.73<br>±3.53    |
| Phvul.002G038600,<br>Phvul.002G038700,<br>Phvul.002G038800,<br>Phvul.002G038900,<br>Phvul.002G039000,<br>Phvul.002G039300 | Chalcone synthase                                                    | 1.28<br>±0.76            | 1.49<br>±0.14 | 1.8<br>±0.77   | 1.31<br>±0.46 | 0.34<br>±0.05   | 1.8<br>±0.69   | 4.12<br>±1.52  | 26.91<br>±2.34   |
| Phvul.004G085676                                                                                                          | Nudix hydrolase related                                              | 0.16<br>±0.04            | 0.39<br>±0.11 | 0.48<br>±0.14  | 0.67<br>±0.28 | 0.27<br>±0.1    | 0.31<br>±0.13  | 0.92<br>±0.23  | 13.39<br>±4.94   |
| Phvul.006G197100,<br>Phvul.006G197200,<br>Phvul.006G197300                                                                | Pathogenesis-related protein 1 (PR1)                                 | 11.29<br>±3.76           | 9.58<br>±2.62 | 13.91<br>±5.88 | 10<br>±4.91   | 7.08<br>±1.87   | 11.86<br>±1.67 | 11.94<br>±3.66 | 326.38<br>±17.06 |
| Phvul.008G032200                                                                                                          | Isoflavone-7- <i>O</i> -β-glucoside 6"- <i>O</i> -malonyltransferase | 4.05<br>±2.97            | 7.02<br>±2.62 | 0.71<br>±0.08  | 0.99<br>±0.3  | 1.27<br>±0.08   | 6.37<br>±2.71  | 1.01<br>±0.17  | 4.78<br>±1.68    |
| Phvul.009G043200                                                                                                          | WRKY transcription factor 38-related                                 | 0.32<br>±0.18            | 0.58<br>±0.28 | 0.42<br>±0.09  | 0.37<br>±0.14 | 0.21<br>±0.06   | 0.31<br>±0.05  | 0.33<br>±0.09  | 2.33<br>±1.29    |
| Phvul.010G042200                                                                                                          | Hydroquinone glucosyltransferase                                     | 1.61<br>±1.15            | 2.97<br>±1.2  | 0.87<br>±0.27  | 1.56<br>±0.5  | 0.64<br>±0.09   | 3.22<br>±1.59  | 1.67<br>±0.68  | 8.91<br>±2.7     |
| CBB-susceptible RIL                                                                                                       |                                                                      |                          |               |                |               |                 |                |                |                  |
| Phvul.001G145600                                                                                                          | Dirigent protein 1-related                                           | 0.55<br>±0.1             | 0.3<br>±0.2   | 0.04<br>±0.04  | 0.32<br>±0.06 | 0<br>±0         | 0.06<br>±0.06  | 0.03<br>±0.03  | 0.85<br>±0.82    |



Table S41 continued

| Gene ID                                                                                                                                                                  | Gene Annotation                                                         | Transcript levels (FPKM) |                |                 |                |                        |                |                 |                 |
|--------------------------------------------------------------------------------------------------------------------------------------------------------------------------|-------------------------------------------------------------------------|--------------------------|----------------|-----------------|----------------|------------------------|----------------|-----------------|-----------------|
|                                                                                                                                                                          |                                                                         | Mock inoculation         |                |                 |                | <i>Xap</i> inoculation |                |                 |                 |
|                                                                                                                                                                          |                                                                         | 0 h PI                   | 8 h PI         | 24 h PI         | 48 h PI        | 0 h PI                 | 8 h PI         | 24 h PI         | 48 h PI         |
| <i>Phvul.002G038600</i> ,<br><i>Phvul.002G038700</i> ,<br><i>Phvul.002G038800</i> ,<br><i>Phvul.002G038900</i> ,<br><i>Phvul.002G039000</i> ,<br><i>Phvul.002G039300</i> | Chalcone synthase                                                       | 1.18<br>±0.5             | 2.04<br>±0.31  | 0.64<br>±0.29   | 0.65<br>±0.04  | 0.16<br>±0.05          | 1.07<br>±0.28  | 0.77<br>±0.18   | 1.33<br>±0.67   |
| <i>Phvul.004G085676</i>                                                                                                                                                  | Nudix hydrolase related                                                 | 0.76<br>±0.58            | 0.4<br>±0.08   | 0.18<br>±0.03   | 3.2<br>±2      | 0.13<br>±0.04          | 0.18<br>±0.08  | 0.35<br>±0.24   | 0.89<br>±0.7    |
| <i>Phvul.006G197100</i> ,<br><i>Phvul.006G197200</i> ,<br><i>Phvul.006G197300</i>                                                                                        | Pathogenesis-related protein 1<br>(PR1)                                 | 29.26<br>±14.35          | 33.09<br>±9.95 | 16.54<br>±14.69 | 16.99<br>±5.87 | 7.23<br>±3.76          | 14.28<br>±5.12 | 17.66<br>±13.68 | 24.78<br>±13.82 |
| <i>Phvul.008G032200</i>                                                                                                                                                  | Isoflavone-7- <i>O</i> -β-glucoside<br>6"- <i>O</i> -malonyltransferase | 3.62<br>±2.75            | 7.59<br>±3.82  | 0.49<br>±0.04   | 0.84<br>±0.22  | 0.85<br>±0.18          | 9.19<br>±0.48  | 0.61<br>±0.11   | 1.02<br>±0.54   |
| <i>Phvul.009G043200</i>                                                                                                                                                  | WRKY transcription factor<br>38-related                                 | 0.61<br>±0.48            | 0.15<br>±0.08  | 0.14<br>±0.06   | 1.35<br>±0.61  | 0.1<br>±0.02           | 0.11<br>±0.02  | 0.13<br>±0.07   | 0.35<br>±0.23   |
| <i>Phvul.010G042200</i>                                                                                                                                                  | Hydroquinone<br>glucosyltransferase                                     | 2.37<br>±1.67            | 2.74<br>±1.51  | 0.3<br>±0.02    | 1.4<br>±0.6    | 0.4<br>±0.04           | 4.23<br>±0.33  | 0.96<br>±0.65   | 1.95<br>±1.39   |

**Table S42. Transcript abundance for genes upregulated in the CBB-resistant RIL at 48 h post-inoculation (PI) with *Xanthomonas axonopodis* (Xap) and downregulated in the CBB-susceptible RIL at 8 h PI.** Transcript levels for individual genes corresponding to each RIL/ inoculation treatment/ sampling time PI are represented as FPKM  $\pm$  SE of three experimental replicates.

|                     |                             | Transcript levels (FPKM) |                |                |                |                 |               |                 |                 |
|---------------------|-----------------------------|--------------------------|----------------|----------------|----------------|-----------------|---------------|-----------------|-----------------|
|                     |                             | Mock inoculation         |                |                |                | Xap inoculation |               |                 |                 |
| Gene ID             | Gene Annotation             | 0 h PI                   | 8 h PI         | 24 h PI        | 48 h PI        | 0 h PI          | 8 h PI        | 24 h PI         | 48 h PI         |
| CBB-resistant RIL   |                             |                          |                |                |                |                 |               |                 |                 |
| Phvul.002G200600    | Tetrahydroberberine oxidase | 0.28<br>±0.13            | 0.13<br>±0.06  | 1.72<br>±1.07  | 0.56<br>±0.13  | 0<br>±0         | 0.13<br>±0.05 | 1.06<br>±0.55   | 32.71<br>±1.73  |
| Phvul.004G098000    | Extensin-like region        | 6.02<br>±1.89            | 3.08<br>±1.23  | 16.74<br>±6.93 | 12.5<br>±1.31  | 3.17<br>±0.68   | 2.01<br>±0.5  | 11.5<br>±2.25   | 255.16<br>±7.49 |
| CBB-susceptible RIL |                             |                          |                |                |                |                 |               |                 |                 |
| Phvul.002G200600    | Tetrahydroberberine oxidase | 0.77<br>±0.36            | 1.28<br>±0.13  | 0.38<br>±0.33  | 0.54<br>±0.24  | 0.05<br>±0.05   | 0.28<br>±0.19 | 0.45<br>±0.32   | 1<br>±0.53      |
| Phvul.004G098000    | Extensin-like region        | 8.16<br>±1.69            | 15.51<br>±6.44 | 6.75<br>±5.26  | 13.13<br>±4.77 | 2.66<br>±0.82   | 3.7<br>±0.84  | 19.74<br>±15.14 | 16.31<br>±6.8   |

**Table S43. Transcript abundance for genes upregulated in the CBB-resistant RIL at 48 h post-inoculation (PI) with *Xanthomonas axonopodis* (Xap) and in the CBB-susceptible RIL at 24 h PI.** Transcript levels for individual genes corresponding to each RIL/ inoculation treatment/ sampling time PI are represented as FPKM  $\pm$  SE of three experimental replicates.

|                                       |                                              | Transcript levels (FPKM) |                |                 |                  |                 |                 |                 |                   |
|---------------------------------------|----------------------------------------------|--------------------------|----------------|-----------------|------------------|-----------------|-----------------|-----------------|-------------------|
|                                       |                                              | Mock inoculation         |                |                 |                  | Xap inoculation |                 |                 |                   |
| Gene ID                               | Gene Annotation                              | 0 h PI                   | 8 h PI         | 24 h PI         | 48 h PI          | 0 h PI          | 8 h PI          | 24 h PI         | 48 h PI           |
| CBB-resistant RIL                     |                                              |                          |                |                 |                  |                 |                 |                 |                   |
| Phvul.006G196900                      | Pathogenesis-related protein 1 (PR1)         | 3.93<br>±2.54            | 7.62<br>±2.2   | 1.99<br>±0.42   | 2.32<br>±0.19    | 1.79<br>±0.72   | 9.2<br>±2.49    | 2.75<br>±1.06   | 33.99<br>±7.53    |
| Phvul.006G124600,<br>Phvul.006G124700 | FAD-binding berberine family protein-related | 0.11<br>±0.11            | 0.08<br>±0.01  | 0.33<br>±0.13   | 0.22<br>±0.05    | 0.08<br>±0.06   | 0.12<br>±0.03   | 0.35<br>±0.16   | 1.67<br>±0.32     |
| Phvul.001G128500                      | β-1,3-glucanase 1-related                    | 32.88<br>±25.47          | 40.37<br>±14.4 | 41.76<br>±14.98 | 126.99<br>±13.57 | 8.31<br>±2.77   | 35.24<br>±16.65 | 89.48<br>±27.66 | 559.47<br>±136.63 |
| CBB-susceptible RIL                   |                                              |                          |                |                 |                  |                 |                 |                 |                   |
| Phvul.006G196900                      | Pathogenesis-related protein 1 (PR1)         | 1.44<br>±0.8             | 1.76<br>±0.83  | 0.66<br>±0.25   | 7.51<br>±3.5     | 0.89<br>±0.21   | 1.35<br>±0.36   | 3.58<br>±2.06   | 2.4<br>±1.18      |
| Phvul.006G124600,<br>Phvul.006G124700 | FAD-binding berberine family protein-related | 0.15<br>±0.08            | 0.16<br>±0.04  | 0.27<br>±0.05   | 1.56<br>±0.57    | 0.02<br>±0.02   | 0.14<br>±0.06   | 1.16<br>±0.99   | 0.49<br>±0.28     |
| Phvul.001G128500                      | β-1,3-glucanase 1-related                    | 22.22<br>±13.78          | 53.86<br>±14.8 | 15.37<br>±1.13  | 110.11<br>±54.43 | 6.18<br>±1.02   | 45.09<br>±17.01 | 96.64<br>±74.85 | 85.44<br>±57.83   |

**Table S44. Transcript abundance for genes that were adversely regulated across both RILs at 48 h post-inoculation (PI) with *Xanthomonas axonopodis* (Xap).** Transcript levels for individual genes corresponding to each RIL/ inoculation treatment/ sampling time PI are represented as FPKM  $\pm$  SE of three experimental replicates.

|                               |                                                 | Transcript levels (FPKM) |                    |                    |                    |                    |                    |                    |                      |
|-------------------------------|-------------------------------------------------|--------------------------|--------------------|--------------------|--------------------|--------------------|--------------------|--------------------|----------------------|
|                               |                                                 | Mock inoculation         |                    |                    |                    | Xap inoculation    |                    |                    |                      |
| Gene ID                       | Gene Annotation                                 | 0 h PI                   | 8 h PI             | 24 h PI            | 48 h PI            | 0 h PI             | 8 h PI             | 24 h PI            | 48 h PI              |
| CBB-resistant RIL upregulated |                                                 |                          |                    |                    |                    |                    |                    |                    |                      |
| Phvul.001G036600              | Fructan $\beta$ -(2,1)-fructosidase / Inulinase | 0.08<br>$\pm 0.01$       | 0.11<br>$\pm 0.06$ | 0.09<br>$\pm 0.02$ | 0.06<br>$\pm 0.04$ | 0.15<br>$\pm 0.08$ | 0.08<br>$\pm 0.03$ | 0.08<br>$\pm 0.05$ | 0.7<br>$\pm 0.29$    |
| Phvul.001G205900              | Protein C41G7.9, isoform B                      | 0.24<br>$\pm 0.09$       | 0.1<br>$\pm 0.05$  | 0.13<br>$\pm 0.02$ | 0.18<br>$\pm 0.13$ | 0.18<br>$\pm 0.12$ | 0.09<br>$\pm 0.09$ | 0.18<br>$\pm 0.05$ | 8.93<br>$\pm 8.64$   |
| Phvul.001G255200              | RING/U-box domain-containing protein            | 0.93<br>$\pm 0.77$       | 0.1<br>$\pm 0.06$  | 0.45<br>$\pm 0.25$ | 1.41<br>$\pm 1.35$ | 0.85<br>$\pm 0.09$ | 0.25<br>$\pm 0.18$ | 1.08<br>$\pm 0.54$ | 20.25<br>$\pm 18.02$ |
| Phvul.002G155400              | Thaumatococin family                            | 0.64<br>$\pm 0.3$        | 0.17<br>$\pm 0.04$ | 1.88<br>$\pm 0.57$ | 0.75<br>$\pm 0.39$ | 0.08<br>$\pm 0.04$ | 0.09<br>$\pm 0.05$ | 1.35<br>$\pm 0.68$ | 21.48<br>$\pm 1.55$  |
| Phvul.002G309300              | Ring zinc finger protein                        | 0.3<br>$\pm 0.15$        | 0.23<br>$\pm 0.06$ | 0.28<br>$\pm 0.14$ | 0<br>$\pm 0$       | 0.14<br>$\pm 0.07$ | 0.32<br>$\pm 0.16$ | 0.06<br>$\pm 0.06$ | 0.63<br>$\pm 0.27$   |
| Phvul.003G128133              | Flavin-containing monooxygenase 1-related       | 0<br>$\pm 0$             | 0.08<br>$\pm 0.04$ | 0.4<br>$\pm 0.3$   | 0.36<br>$\pm 0.15$ | 0<br>$\pm 0$       | 0.11<br>$\pm 0.03$ | 0.41<br>$\pm 0.36$ | 5.26<br>$\pm 0.34$   |
| Phvul.003G131500              | 12-Oxophytodienoate reductase 3                 | 0.58<br>$\pm 0.1$        | 1.55<br>$\pm 0.2$  | 0.42<br>$\pm 0.08$ | 0.12<br>$\pm 0.06$ | 0.64<br>$\pm 0.07$ | 0.85<br>$\pm 0.08$ | 0.74<br>$\pm 0.44$ | 2.59<br>$\pm 0.84$   |
| Phvul.005G053100              | Glutathione S-transferase U21-related           | 0.64<br>$\pm 0.09$       | 0.67<br>$\pm 0.21$ | 0.32<br>$\pm 0.18$ | 0.55<br>$\pm 0.14$ | 0.74<br>$\pm 0.13$ | 0.68<br>$\pm 0.17$ | 1.21<br>$\pm 0.43$ | 5.35<br>$\pm 3.44$   |
| Phvul.005G108900              | Transferase family                              | 1.18<br>$\pm 0.16$       | 1.52<br>$\pm 0.78$ | 0.58<br>$\pm 0.12$ | 1.23<br>$\pm 0.14$ | 1.46<br>$\pm 0.24$ | 1.16<br>$\pm 0.16$ | 0.9<br>$\pm 0.16$  | 5.63<br>$\pm 1.8$    |
| Phvul.007G066300              | No functional annotation                        | 0.43<br>$\pm 0.25$       | 0.39<br>$\pm 0.2$  | 0.29<br>$\pm 0.17$ | 1.27<br>$\pm 0.31$ | 0.46<br>$\pm 0.14$ | 0.44<br>$\pm 0.25$ | 0.7<br>$\pm 0.27$  | 9.07<br>$\pm 4$      |
| Phvul.007G111200              | Calcium binding protein                         | 1.83<br>$\pm 0.37$       | 1.62<br>$\pm 0.77$ | 1.14<br>$\pm 0.05$ | 1.4<br>$\pm 0.24$  | 2.16<br>$\pm 0.65$ | 1.52<br>$\pm 0.9$  | 1.79<br>$\pm 0.47$ | 7.84<br>$\pm 4.72$   |
| Phvul.010G093500              | BON1-associated protein 1-related               | 0.75<br>$\pm 0.14$       | 1.09<br>$\pm 0.1$  | 1.02<br>$\pm 0.45$ | 0.35<br>$\pm 0.31$ | 0.58<br>$\pm 0.16$ | 1.1<br>$\pm 0.44$  | 2<br>$\pm 0.58$    | 3.77<br>$\pm 0.51$   |

Table S44 continued

Table S11 continued

| Gene ID                                  | Gene Annotation                                                | Transcript levels (FPKM) |                   |                  |                  |                    |                   |                   |                  |
|------------------------------------------|----------------------------------------------------------------|--------------------------|-------------------|------------------|------------------|--------------------|-------------------|-------------------|------------------|
|                                          |                                                                | Mock inoculation         |                   |                  |                  | Xap inoculation    |                   |                   |                  |
|                                          |                                                                | 0 h PI                   | 8 h PI            | 24 h PI          | 48 h PI          | 0 h PI             | 8 h PI            | 24 h PI           | 48 h PI          |
| <b>CBB-resistant RIL downregulated</b>   |                                                                |                          |                   |                  |                  |                    |                   |                   |                  |
| <i>Phvul.003G169100</i>                  | Hydrophobic seed protein                                       | 40.5<br>±15.84           | 36.23<br>±2.21    | 38.49<br>±23.19  | 17.51<br>±4.98   | 49.37<br>±15.77    | 39.43<br>±1.84    | 23.64<br>±3.52    | 3.65<br>±1.59    |
| <i>Phvul.008G076300</i>                  | 4,4-dimethyl-9β,19-cyclopropylsterol-4-α-methyl oxidase (SMO1) | 9.38<br>±0.39            | 10.9<br>±1.32     | 3.67<br>±1.65    | 1.82<br>±0.84    | 9.39<br>±1.02      | 11.39<br>±0.81    | 5.63<br>±0.57     | 0.41<br>±0.25    |
| <i>Phvul.011G026700</i>                  | Proline-rich protein 4                                         | 1087.49<br>±125.66       | 1139.65<br>±82.56 | 366.15<br>±245.7 | 118.78<br>±68.29 | 1146.18<br>±146.68 | 1076.04<br>±33.82 | 258.72<br>±64.09  | 21.66<br>±5.21   |
| <b>CBB-susceptible RIL upregulated</b>   |                                                                |                          |                   |                  |                  |                    |                   |                   |                  |
| <i>Phvul.002G155400</i>                  | Thaumatococin family                                           | 0.82<br>±0.37            | 1.11<br>±0.2      | 0.61<br>±0.47    | 0.38<br>±0.13    | 0.25<br>±0.15      | 0.4<br>±0.22      | 0.35<br>±0.18     | 1.83<br>±1.2     |
| <i>Phvul.003G131500</i>                  | 12-Oxophytodienoate reductase 3                                | 0.49<br>±0.1             | 0.61<br>±0.12     | 0.2<br>±0.02     | 0.11<br>±0.05    | 0.96<br>±0.13      | 1.01<br>±0.27     | 0.36<br>±0.07     | 0.66<br>±0.22    |
| <i>Phvul.003G169100</i>                  | Hydrophobic seed protein                                       | 29.92<br>±3.01           | 29.26<br>±4.95    | 37.43<br>±13.05  | 4.73<br>±1.89    | 36.37<br>±5.23     | 20.98<br>±1.5     | 19.28<br>±9.7     | 21.51<br>±9.65   |
| <i>Phvul.008G076300</i>                  | 4,4-dimethyl-9β,19-cyclopropylsterol-4α-methyl oxidase (SMO1)  | 7.21<br>±2.32            | 7.16<br>±3.66     | 6.54<br>±2.22    | 0.38<br>±0.09    | 6.59<br>±1.01      | 7.39<br>±1.52     | 2.91<br>±1.36     | 3.59<br>±1.75    |
| <i>Phvul.010G093500</i>                  | BON1-associated protein 1-related                              | 0.75<br>±0.51            | 0.72<br>±0.39     | 0.74<br>±0.24    | 0.15<br>±0.03    | 0.45<br>±0.13      | 1.1<br>±0.33      | 0.61<br>±0.19     | 1.57<br>±0.58    |
| <i>Phvul.011G026700</i>                  | Proline-rich protein 4                                         | 1004.13<br>±58.08        | 662.57<br>±331.68 | 404.29<br>±72.89 | 24.11<br>±4.45   | 1109.66<br>±120.05 | 863.29<br>±204.69 | 235.91<br>±130.63 | 245.5<br>±131.52 |
| <b>CBB-susceptible RIL downregulated</b> |                                                                |                          |                   |                  |                  |                    |                   |                   |                  |
| <i>Phvul.001G036600</i>                  | Fructan β-(2,1)-fructosidase / Inulinase                       | 0.31<br>±0.16            | 0.18<br>±0.12     | 0.15<br>±0.02    | 1.19<br>±0.73    | 0.13<br>±0.05      | 0.09<br>±0.02     | 0.12<br>±0.08     | 0.3<br>±0.17     |

Table S44 continued

| Gene ID                 | Gene Annotation                           | Transcript levels (FPKM) |               |               |                 |                        |               |               |               |
|-------------------------|-------------------------------------------|--------------------------|---------------|---------------|-----------------|------------------------|---------------|---------------|---------------|
|                         |                                           | Mock inoculation         |               |               |                 | <i>Xap</i> inoculation |               |               |               |
|                         |                                           | 0 h PI                   | 8 h PI        | 24 h PI       | 48 h PI         | 0 h PI                 | 8 h PI        | 24 h PI       | 48 h PI       |
| <i>Phvul.001G205900</i> | Protein C41G7.9, isoform B                | 0.46<br>±0.25            | 0<br>±0       | 0.29<br>±0.07 | 3.35<br>±3.09   | 0.42<br>±0.01          | 0<br>±0       | 0.14<br>±0.03 | 0.52<br>±0.53 |
| <i>Phvul.001G255200</i> | RING/U-box domain-containing protein      | 0.54<br>±0.38            | 0.05<br>±0.03 | 0.39<br>±0.18 | 14.56<br>±10.89 | 0.96<br>±0.81          | 0.03<br>±0.02 | 0.12<br>±0.08 | 1.97<br>±1.45 |
| <i>Phvul.002G309300</i> | Ring zinc finger protein                  | 0.14<br>±0.14            | 0.36<br>±0.12 | 0.12<br>±0.06 | 0.61<br>±0.24   | 0.07<br>±0.08          | 0.48<br>±0.25 | 0.2<br>±0.2   | 0<br>±0       |
| <i>Phvul.003G128133</i> | Flavin-containing monooxygenase 1-related | 0.02<br>±0.02            | 0.01<br>±0.01 | 0.06<br>±0.05 | 1.7<br>±1.1     | 0.05<br>±0.03          | 0.14<br>±0.13 | 0.29<br>±0.18 | 0.34<br>±0.23 |
| <i>Phvul.005G053100</i> | Glutathione S-transferase U21-related     | 0.73<br>±0.18            | 0.15<br>±0.02 | 0.11<br>±0.03 | 2.32<br>±1.53   | 0.44<br>±0.09          | 0.21<br>±0.03 | 0.12<br>±0.09 | 0.29<br>±0.1  |
| <i>Phvul.005G108900</i> | Transferase family                        | 1.86<br>±1.15            | 0.53<br>±0.07 | 0.33<br>±0.08 | 3.28<br>±1.97   | 0.75<br>±0.27          | 0.43<br>±0.03 | 0.57<br>±0.29 | 0.57<br>±0.32 |
| <i>Phvul.007G066300</i> | No functional annotation                  | 0.75<br>±0.4             | 0.44<br>±0.14 | 0.06<br>±0.06 | 7.59<br>±5.42   | 0.07<br>±0.07          | 0.04<br>±0.04 | 0.73<br>±0.38 | 1.29<br>±0.92 |
| <i>Phvul.007G111200</i> | Calcium binding protein                   | 1.25<br>±0.48            | 0.71<br>±0.07 | 0.83<br>±0.13 | 6.86<br>±4.51   | 1.1<br>±0.16           | 0.53<br>±0.14 | 0.59<br>±0.22 | 1.16<br>±0.44 |

**Table S45. Transcript abundance for a gene upregulated in the CBB-resistant RIL at 48 h post-inoculation (PI) with *Xanthomonas axonopodis* (Xap) and downregulated at 0 h PI and upregulated at 24 h PI in the CBB-susceptible RIL.**  
Transcript levels for individual genes corresponding to each RIL/ inoculation treatment/ sampling time PI are represented as FPKM  $\pm$  SE of three experimental replicates.

|                     |                            | Transcript levels (FPKM) |               |               |               |                 |               |               |                  |
|---------------------|----------------------------|--------------------------|---------------|---------------|---------------|-----------------|---------------|---------------|------------------|
|                     |                            | Mock inoculation         |               |               |               | Xap inoculation |               |               |                  |
| Gene ID             | Gene Annotation            | 0 h PI                   | 8 h PI        | 24 h PI       | 48 h PI       | 0 h PI          | 8 h PI        | 24 h PI       | 48 h PI          |
| CBB-resistant RIL   |                            |                          |               |               |               |                 |               |               |                  |
| Phvul.001G145700    | Dirigent protein 1-related | 0.64<br>±0.42            | 0.29<br>±0.14 | 0.8<br>±0.33  | 1.13<br>±0.33 | 0.14<br>±0.14   | 0.15<br>±0.12 | 0.25<br>±0.11 | 102.18<br>±10.58 |
| CBB-susceptible RIL |                            |                          |               |               |               |                 |               |               |                  |
| Phvul.001G145700    | Dirigent protein 1-related | 0.53<br>±0.2             | 0.94<br>±0.74 | 0.27<br>±0.12 | 1.43<br>±0.81 | 0<br>±0         | 0.29<br>±0.23 | 1.38<br>±0.96 | 1.07<br>±0.64    |

**Table S46. Transcript abundance for a gene upregulated in the CBB-resistant RIL at 48 h post-inoculation (PI) with *Xanthomonas axonopodis* (Xap) and downregulated at 0 h PI and upregulated at 48 h PI in the CBB-susceptible RIL.**  
Transcript levels for individual genes corresponding to each RIL/ inoculation treatment/ sampling time PI are represented as FPKM  $\pm$  SE of three experimental replicates.

|                     |                           | Transcript levels (FPKM) |               |              |               |                 |               |               |                |
|---------------------|---------------------------|--------------------------|---------------|--------------|---------------|-----------------|---------------|---------------|----------------|
|                     |                           | Mock inoculation         |               |              |               | Xap inoculation |               |               |                |
| Gene ID             | Gene Annotation           | 0 h PI                   | 8 h PI        | 24 h PI      | 48 h PI       | 0 h PI          | 8 h PI        | 24 h PI       | 48 h PI        |
| CBB-resistant RIL   |                           |                          |               |              |               |                 |               |               |                |
| Phvul.009G244100    | Isoflavone 2'-hydroxylase | 1.6<br>±1.35             | 1.09<br>±0.47 | 1.2<br>±0.22 | 1.13<br>±0.24 | 0.02<br>±0.02   | 1.66<br>±0.82 | 2.04<br>±0.53 | 10.51<br>±1.19 |
| CBB-susceptible RIL |                           |                          |               |              |               |                 |               |               |                |
| Phvul.009G244100    | Isoflavone 2'-hydroxylase | 1.34<br>±1.28            | 1.33<br>±0.76 | 0.5<br>±0.13 | 0.21<br>±0.08 | 0.12<br>±0.08   | 1.16<br>±0.2  | 0.87<br>±0.2  | 1.52<br>±0.47  |

**Table S47. Transcript abundance for a gene downregulated in the CBB-resistant RIL at 48 h post-inoculation (PI) with *Xanthomonas axonopodis* (Xap) and downregulated at 24 h PI and upregulated at 48 h PI in the CBB-susceptible RIL.** Transcript levels for individual genes corresponding to each RIL/ inoculation treatment/ sampling time PI are represented as FPKM  $\pm$  SE of three experimental replicates.

|                     |                          | Transcript levels (FPKM) |        |         |         |                 |        |         |         |
|---------------------|--------------------------|--------------------------|--------|---------|---------|-----------------|--------|---------|---------|
|                     |                          | Mock inoculation         |        |         |         | Xap inoculation |        |         |         |
| Gene ID             | Gene Annotation          | 0 h PI                   | 8 h PI | 24 h PI | 48 h PI | 0 h PI          | 8 h PI | 24 h PI | 48 h PI |
| CBB-resistant RIL   |                          |                          |        |         |         |                 |        |         |         |
| Phvul.006G035050,   | No functional annotation | 0.85                     | 1.09   | 0.64    | 3.14    | 3.11            | 3.64   | 0.62    | 0.52    |
| Phvul.006G035100    |                          | ±0.16                    | ±0.23  | ±0.06   | ±2.29   | ±2.53           | ±1.48  | ±0.04   | ±0.08   |
| CBB-susceptible RIL |                          |                          |        |         |         |                 |        |         |         |
| Phvul.006G035050,   | No functional annotation | 0.87                     | 2.66   | 7.26    | 0.55    | 0.61            | 1.36   | 0.72    | 2.59    |
| Phvul.006G035100    |                          | ±0.1                     | ±1.14  | ±4.39   | ±0.09   | ±0.01           | ±0.16  | ±0.05   | ±1.82   |

**Table S48. Transcript abundance for a gene downregulated in the CBB-susceptible RIL at 0 h post-inoculation (PI) with *Xanthomonas axonopodis* (Xap) and upregulated at 8 h PI.** Transcript levels for individual genes corresponding to each RIL/ inoculation treatment/ sampling time PI are represented as FPKM  $\pm$  SE of three experimental replicates.

| Gene ID     | Gene Annotation          | Transcript levels (FPKM) |         |         |            |                 |            |            |         |
|-------------|--------------------------|--------------------------|---------|---------|------------|-----------------|------------|------------|---------|
|             |                          | Mock inoculation         |         |         |            | Xap inoculation |            |            |         |
|             |                          | 0 h PI                   | 8 h PI  | 24 h PI | 48 h PI    | 0 h PI          | 8 h PI     | 24 h PI    | 48 h PI |
| XLOC_008103 | No functional annotation | 0.66                     | 0       | 0       | 0.38       | 0               | 0.97       | 0.41       | 0       |
|             |                          | $\pm 0.66$               | $\pm 0$ | $\pm 0$ | $\pm 0.32$ | $\pm 0$         | $\pm 0.54$ | $\pm 0.41$ | $\pm 0$ |



**Table S49. Transcript abundance for a gene upregulated in the CBB-susceptible RIL at 0 h and 48 h post-inoculation (PI) with *Xanthomonas axonopodis* (Xap).** Transcript levels for individual genes corresponding to each RIL/ inoculation treatment/ sampling time PI are represented as FPKM  $\pm$  SE of three experimental replicates.

| Gene ID                 | Gene Annotation          | Transcript levels (FPKM) |                    |                   |                    |                    |                    |                    |                    |
|-------------------------|--------------------------|--------------------------|--------------------|-------------------|--------------------|--------------------|--------------------|--------------------|--------------------|
|                         |                          | Mock inoculation         |                    |                   |                    | Xap inoculation    |                    |                    |                    |
|                         |                          | 0 h PI                   | 8 h PI             | 24 h PI           | 48 h PI            | 0 h PI             | 8 h PI             | 24 h PI            | 48 h PI            |
| <i>Phvul.003G268200</i> | No functional annotation | 0.42<br>$\pm 0.08$       | 0.11<br>$\pm 0.01$ | 0.2<br>$\pm 0.12$ | 0.28<br>$\pm 0.18$ | 2.33<br>$\pm 1.13$ | 0.12<br>$\pm 0.07$ | 0.07<br>$\pm 0.02$ | 1.25<br>$\pm 0.94$ |

**Table S50. Transcript abundance for a gene upregulated in the CBB-susceptible RIL at 0 h post-inoculation (PI) with *Xanthomonas axonopodis* (Xap) and at 8 and 24 h PI and downregulated at 48 h PI.** Transcript levels for individual genes corresponding to each RIL/ inoculation treatment/ sampling time PI are represented as FPKM  $\pm$  SE of three experimental replicates.

| Gene ID     | Gene Annotation          | Transcript levels (FPKM) |              |              |                  |                  |                  |                   |              |
|-------------|--------------------------|--------------------------|--------------|--------------|------------------|------------------|------------------|-------------------|--------------|
|             |                          | Mock inoculation         |              |              |                  | Xap inoculation  |                  |                   |              |
|             |                          | 0 h PI                   | 8 h PI       | 24 h PI      | 48 h PI          | 0 h PI           | 8 h PI           | 24 h PI           | 48 h PI      |
| XLOC_015635 | No functional annotation | 0<br>$\pm 0$             | 0<br>$\pm 0$ | 0<br>$\pm 0$ | 1.8<br>$\pm 1.8$ | 2.2<br>$\pm 1.1$ | 0.8<br>$\pm 0.8$ | 1.09<br>$\pm 1.1$ | 0<br>$\pm 0$ |

**Table S51. Transcript abundance for genes adversely regulated (up or up and down) in the CBB-susceptible RIL at 8 h and 24 h post-inoculation (PI) with *Xanthomonas axonopodis* (Xap).** Transcript levels for individual genes corresponding to each RIL/ inoculation treatment/ sampling time PI are represented as FPKM  $\pm$  SE of three experimental replicates.

|                                              |                                                                       | Transcript levels (FPKM) |               |               |               |                 |               |               |               |
|----------------------------------------------|-----------------------------------------------------------------------|--------------------------|---------------|---------------|---------------|-----------------|---------------|---------------|---------------|
|                                              |                                                                       | Mock inoculation         |               |               |               | Xap inoculation |               |               |               |
| Gene ID                                      | Gene Annotation                                                       | 0 h PI                   | 8 h PI        | 24 h PI       | 48 h PI       | 0 h PI          | 8 h PI        | 24 h PI       | 48 h PI       |
| Upregulated                                  |                                                                       |                          |               |               |               |                 |               |               |               |
| XLOC_020701                                  | No functional annotation                                              | 0.7<br>±0.35             | 0<br>±0       | 0<br>±0       | 1.24<br>±0.25 | 0.39<br>±0.39   | 1.36<br>±0.39 | 2.8<br>±0.51  | 1.08<br>±0.54 |
| Downregulated 8 h PI and upregulated 24 h PI |                                                                       |                          |               |               |               |                 |               |               |               |
| Phvul.004G092694                             | Light-harvesting complex II chlorophyll a/b binding protein 1 (LHCB1) | 5.87<br>±3.49            | 0.66<br>±0.33 | 0.59<br>±0.52 | 0.5<br>±0.28  | 2.6<br>±2.03    | 0<br>±0       | 2.68<br>±1.94 | 1.26<br>±1.26 |

**Table S52. Gene ontology (GO) terms enriched across the differentially expressed genes of the CBB-susceptible RIL at 0 h post-inoculation with *Xanthomonas axonopodis* (Xap).**

| Gene ID                 | GO Term    | Description                                               |
|-------------------------|------------|-----------------------------------------------------------|
| <i>Phvul.001G124300</i> | GO:0004616 | Phosphogluconate dehydrogenase (decarboxylating) activity |
|                         | GO:0004735 | Pyrroline-5-carboxylate reductase activity                |
|                         | GO:0006098 | Pentose-phosphate shunt                                   |
|                         | GO:0006561 | Proline biosynthetic process                              |
|                         | GO:0016491 | Oxidoreductase activity                                   |
|                         | GO:0055114 | Oxidation-reduction process                               |
| <i>Phvul.002G038600</i> | GO:0004315 | 3-Oxoacyl-[acyl-carrier-protein] synthase activity        |
|                         | GO:0006633 | Fatty acid biosynthetic process                           |
|                         | GO:0008415 | Metabolic process                                         |
|                         | GO:0016020 | Membrane                                                  |
| <i>Phvul.002G038700</i> | GO:0004315 | 3-Oxoacyl-[acyl-carrier-protein] synthase activity        |
|                         | GO:0006633 | Fatty acid biosynthetic process                           |
|                         | GO:0008415 | Metabolic process                                         |
|                         | GO:0016020 | Membrane                                                  |
| <i>Phvul.002G038800</i> | GO:0008415 | Metabolic process                                         |
|                         | GO:0008610 | Lipid biosynthetic process                                |
| <i>Phvul.002G038900</i> | GO:0004315 | 3-Oxoacyl-[acyl-carrier-protein] synthase activity        |
|                         | GO:0006633 | Fatty acid biosynthetic process                           |
|                         | GO:0008415 | Metabolic process                                         |
|                         | GO:0016020 | Membrane                                                  |
|                         | GO:0008415 | Metabolic process                                         |
|                         | GO:0008610 | Lipid biosynthetic process                                |
| <i>Phvul.002G039300</i> | GO:0004315 | 3-Oxoacyl-[acyl-carrier-protein] synthase activity        |
|                         | GO:0006633 | Fatty acid biosynthetic process                           |
|                         | GO:0008415 | Metabolic process                                         |
|                         | GO:0016020 | Membrane                                                  |
| <i>Phvul.002G077400</i> | GO:0016757 | Transferase activity, transferring glycosyl groups        |
| <i>Phvul.002G096000</i> | GO:0005975 | Carbohydrate metabolic process                            |
|                         | GO:0016868 | Intramolecular transferase activity, phosphotransferases  |
| <i>Phvul.003G052400</i> | GO:0004553 | Hydrolase activity, hydrolyzing O-glycosyl compounds      |
|                         | GO:0005618 | Cell wall                                                 |
|                         | GO:0005975 | Carbohydrate metabolic process                            |
|                         | GO:0006073 | Cellular glucan metabolic process                         |
|                         | GO:0016762 | Xyloglucan:xyloglucosyl transferase activity              |
|                         | GO:0048046 | Apoplast                                                  |
| <i>Phvul.003G079900</i> | GO:0004553 | Hydrolase activity, hydrolyzing O-glycosyl compounds      |
|                         | GO:0005975 | Carbohydrate metabolic process                            |

**Table S52 continued**

| <b>Gene ID</b>          | <b>GO term</b> | <b>Description</b>                                             |
|-------------------------|----------------|----------------------------------------------------------------|
| <i>Phvul.003G137600</i> | GO:0004553     | Hydrolase activity, hydrolyzing <i>O</i> -glycosyl compounds   |
|                         | GO:0005618     | Cell wall                                                      |
|                         | GO:0005975     | Carbohydrate metabolic process                                 |
|                         | GO:0006073     | Cellular glucan metabolic process                              |
|                         | GO:0016762     | Xyloglucan:xyloglucosyl transferase activity                   |
|                         | GO:0048046     | Apoplast                                                       |
| <i>Phvul.003G147300</i> | GO:0004553     | Hydrolase activity, hydrolyzing <i>O</i> -glycosyl compounds   |
|                         | GO:0005618     | Cell wall                                                      |
|                         | GO:0005975     | Carbohydrate metabolic process                                 |
|                         | GO:0006073     | Cellular glucan metabolic process                              |
|                         | GO:0016762     | Xyloglucan:xyloglucosyl transferase activity                   |
|                         | GO:0048046     | Apoplast                                                       |
| <i>Phvul.003G147500</i> | GO:0004553     | Hydrolase activity, hydrolyzing <i>O</i> -glycosyl compounds   |
|                         | GO:0005618     | Cell wall                                                      |
|                         | GO:0005975     | Carbohydrate metabolic process                                 |
|                         | GO:0006073     | Cellular glucan metabolic process                              |
|                         | GO:0016762     | Xyloglucan:xyloglucosyl transferase activity                   |
|                         | GO:0048046     | Apoplast                                                       |
| <i>Phvul.003G147600</i> | GO:0004553     | Hydrolase activity, hydrolyzing <i>O</i> -glycosyl compounds   |
|                         | GO:0005618     | Cell wall                                                      |
|                         | GO:0005975     | Carbohydrate metabolic process                                 |
|                         | GO:0006073     | Cellular glucan metabolic process                              |
|                         | GO:0016762     | Xyloglucan:xyloglucosyl transferase activity                   |
|                         | GO:0048046     | Apoplast                                                       |
| <i>Phvul.003G147700</i> | GO:0004553     | Hydrolase activity, hydrolyzing <i>O</i> -glycosyl compounds   |
|                         | GO:0005618     | Cell wall                                                      |
|                         | GO:0005975     | Carbohydrate metabolic process                                 |
|                         | GO:0006073     | Cellular glucan metabolic process                              |
|                         | GO:0016762     | Xyloglucan:xyloglucosyl transferase activity                   |
|                         | GO:0048046     | Apoplast                                                       |
| <i>Phvul.003G152300</i> | GO:0003854     | 3- $\beta$ -hydroxy- $\Delta$ 5-steroid dehydrogenase activity |
|                         | GO:0006694     | Steroid biosynthetic process                                   |
|                         | GO:0008831     | dTDP-4-dehydrorhamnose reductase activity                      |
|                         | GO:0009058     | Biosynthetic process                                           |
|                         | GO:0016491     | Oxidoreductase activity                                        |
|                         | GO:0044237     | Cellular metabolic process                                     |
|                         | GO:0045226     | Extracellular polysaccharide biosynthetic process              |
|                         | GO:0050662     | Coenzyme binding                                               |
|                         | GO:0055114     | Oxidation-reduction process                                    |
| <i>Phvul.004G022700</i> | GO:0016757     | Transferase activity, transferring glycosyl groups             |

**Table S52 continued**

| <b>Gene ID</b>          | <b>GO term</b> | <b>Description</b>                                           |
|-------------------------|----------------|--------------------------------------------------------------|
| <i>Phvul.004G047900</i> | GO:0004657     | Proline dehydrogenase activity                               |
|                         | GO:0006537     | Glutamate biosynthetic process                               |
|                         | GO:0006562     | Proline catabolic process                                    |
|                         | GO:0055114     | Oxidation-reduction process                                  |
| <i>Phvul.004G083200</i> | GO:0008080     | N-Acetyltransferase activity                                 |
|                         | GO:0008152     | Metabolic process                                            |
| <i>Phvul.005G039200</i> | GO:0004553     | Hydrolase activity, hydrolyzing <i>O</i> -glycosyl compounds |
|                         | GO:0005975     | Carbohydrate metabolic process                               |
| <i>Phvul.005G111300</i> | GO:0004553     | Hydrolase activity, hydrolyzing <i>O</i> -glycosyl compounds |
|                         | GO:0005618     | Cell wall                                                    |
|                         | GO:0005975     | Carbohydrate metabolic process                               |
|                         | GO:0006073     | Cellular glucan metabolic process                            |
|                         | GO:0016762     | Xyloglucan:xyloglucosyl transferase activity                 |
|                         | GO:0048046     | Apoplast                                                     |
| <i>Phvul.006G064100</i> | GO:0004645     | 1,4- $\alpha$ -Oligoglucan phosphorylase activity            |
|                         | GO:0005975     | Carbohydrate metabolic process                               |
| <i>Phvul.006G065300</i> | GO:0009228     | Thiamine biosynthetic process                                |
| <i>Phvul.006G069300</i> | GO:0004066     | Asparagine synthase (glutamine-hydrolyzing) activity         |
|                         | GO:0006529     | Asparagine biosynthetic process                              |
| <i>Phvul.006G151300</i> | GO:0004553     | Hydrolase activity, hydrolyzing <i>O</i> -glycosyl compounds |
|                         | GO:0005975     | Carbohydrate metabolic process                               |
| <i>Phvul.006G151400</i> | GO:0004553     | Hydrolase activity, hydrolyzing <i>O</i> -glycosyl compounds |
|                         | GO:0005975     | Carbohydrate metabolic process                               |
| <i>Phvul.008G103900</i> | GO:0008152     | Metabolic process                                            |
|                         | GO:0016758     | Transferase activity, transferring hexosyl groups            |
| <i>Phvul.008G237500</i> | GO:0004356     | Glutamate-ammonia ligase activity                            |
|                         | GO:0006542     | Glutamine biosynthetic process                               |
|                         | GO:0006807     | Nitrogen compound metabolic process                          |
| <i>Phvul.008G279800</i> | GO:0016020     | Membrane                                                     |
|                         | GO:0016760     | Cellulose synthase (UDP-forming) activity                    |
|                         | GO:0030244     | Cellulose biosynthetic process                               |
| <i>Phvul.010G042200</i> | GO:0008152     | Metabolic process                                            |
|                         | GO:0016758     | Transferase activity, transferring hexosyl groups            |
| <i>Phvul.011G107000</i> | GO:0004553     | Hydrolase activity, hydrolyzing <i>O</i> -glycosyl compounds |
|                         | GO:0005618     | Cell wall                                                    |
|                         | GO:0005975     | Carbohydrate metabolic process                               |
|                         | GO:0006073     | Cellular glucan metabolic process                            |
|                         | GO:0016762     | Xyloglucan:xyloglucosyl transferase activity                 |
|                         | GO:0048046     | Apoplast                                                     |

**Table S52 continued**

| <b>Gene ID</b>          | <b>GO term</b> | <b>Description</b>                                |
|-------------------------|----------------|---------------------------------------------------|
| <i>Phvul.011G138600</i> | GO:0008152     | Metabolic process                                 |
|                         | GO:0016758     | Transferase activity, transferring hexosyl groups |

**Table S53. Gene ontology (GO) terms enriched across the differentially expressed genes of the CBB-resistant RIL at 0 h post-inoculation with *Xanthomonas axonopodis* (Xap)**

| Gene ID                 | GO term    | Description                                                  |
|-------------------------|------------|--------------------------------------------------------------|
| <i>Phvul.001G226300</i> | GO:0031072 | Heat shock protein binding                                   |
| <i>Phvul.002G077400</i> | GO:0016757 | Transferase activity, transferring glycosyl groups           |
| <i>Phvul.002G093000</i> | GO:0031072 | Heat shock protein binding                                   |
| <i>Phvul.002G096000</i> | GO:0005975 | Carbohydrate metabolic process                               |
|                         | GO:0016868 | Intramolecular transferase activity, phosphotransferases     |
| <i>Phvul.002G168400</i> | GO:0004645 | 1,4- $\alpha$ -Oligoglucan phosphorylase activity            |
|                         | GO:0005975 | Carbohydrate metabolic process                               |
| <i>Phvul.003G004300</i> | GO:0031072 | Heat shock protein binding                                   |
| <i>Phvul.003G047100</i> | GO:0008152 | Metabolic process                                            |
|                         | GO:0016758 | Transferase activity, transferring hexosyl groups            |
| <i>Phvul.003G052400</i> | GO:0004553 | Hydrolase activity, hydrolyzing <i>O</i> -glycosyl compounds |
|                         | GO:0005618 | Cell wall                                                    |
|                         | GO:0005975 | Carbohydrate metabolic process                               |
|                         | GO:0006073 | Cellular glucan metabolic process                            |
|                         | GO:0016762 | Xyloglucan:xyloglucosyl transferase activity                 |
|                         | GO:0048046 | Apoplast                                                     |
| <i>Phvul.003G137600</i> | GO:0004553 | Hydrolase activity, hydrolyzing <i>O</i> -glycosyl compounds |
|                         | GO:0005618 | Cell wall                                                    |
|                         | GO:0005975 | Carbohydrate metabolic process                               |
|                         | GO:0006073 | Cellular glucan metabolic process                            |
|                         | GO:0016762 | Xyloglucan:xyloglucosyl transferase activity                 |
|                         | GO:0048046 | Apoplast                                                     |
| <i>Phvul.003G147400</i> | GO:0004553 | Hydrolase activity, hydrolyzing <i>O</i> -glycosyl compounds |
|                         | GO:0005618 | Cell wall                                                    |
|                         | GO:0005975 | Carbohydrate metabolic process                               |
|                         | GO:0006073 | Cellular glucan metabolic process                            |
|                         | GO:0016762 | Xyloglucan:xyloglucosyl transferase activity                 |
|                         | GO:0048046 | Apoplast                                                     |
| <i>Phvul.003G147500</i> | GO:0004553 | Hydrolase activity, hydrolyzing <i>O</i> -glycosyl compounds |
|                         | GO:0005618 | Cell wall                                                    |
|                         | GO:0005975 | Carbohydrate metabolic process                               |
|                         | GO:0006073 | Cellular glucan metabolic process                            |
|                         | GO:0016762 | Xyloglucan:xyloglucosyl transferase activity                 |
|                         | GO:0048046 | Apoplast                                                     |
| <i>Phvul.003G147600</i> | GO:0004553 | Hydrolase activity, hydrolyzing <i>O</i> -glycosyl compounds |
|                         | GO:0005618 | Cell wall                                                    |
|                         | GO:0005975 | Carbohydrate metabolic process                               |

**Table S53 continued**

| <b>Gene ID</b>          | <b>GO term</b> | <b>Description</b>                                                                                                            |
|-------------------------|----------------|-------------------------------------------------------------------------------------------------------------------------------|
|                         | GO:0006073     | Cellular glucan metabolic process                                                                                             |
|                         | GO:0016762     | Xyloglucan:xyloglucosyl transferase activity                                                                                  |
|                         | GO:0048046     | Apoplast                                                                                                                      |
| <i>Phvul.003G147700</i> | GO:0004553     | Hydrolase activity, hydrolyzing <i>O</i> -glycosyl compounds                                                                  |
|                         | GO:0005618     | Cell wall                                                                                                                     |
|                         | GO:0005975     | Carbohydrate metabolic process                                                                                                |
|                         | GO:0006073     | Cellular glucan metabolic process                                                                                             |
|                         | GO:0016762     | Xyloglucan:xyloglucosyl transferase activity                                                                                  |
|                         | GO:0048046     | Apoplast                                                                                                                      |
| <i>Phvul.004G129600</i> | GO:0004866     | Endopeptidase inhibitor activity                                                                                              |
| <i>Phvul.004G129700</i> | GO:0004866     | Endopeptidase inhibitor activity                                                                                              |
| <i>Phvul.004G129800</i> | GO:0004866     | Endopeptidase inhibitor activity                                                                                              |
| <i>Phvul.004G129900</i> | GO:0004866     | Endopeptidase inhibitor activity                                                                                              |
| <i>Phvul.004G130000</i> | GO:0004866     | Endopeptidase inhibitor activity                                                                                              |
| <i>Phvul.004G137600</i> | GO:0004866     | Endopeptidase inhibitor activity                                                                                              |
| <i>Phvul.004G138500</i> | GO:0004866     | Endopeptidase inhibitor activity                                                                                              |
| <i>Phvul.005G001000</i> | GO:0016020     | Membrane                                                                                                                      |
|                         | GO:0016760     | Cellulose synthase (UDP-forming) activity                                                                                     |
|                         | GO:0030244     | Cellulose biosynthetic process                                                                                                |
| <i>Phvul.005G156800</i> | GO:0005515     | Protein binding                                                                                                               |
|                         | GO:0016702     | Oxidoreductase activity, acting on single donors with incorporation of molecular oxygen, incorporation of two atoms of oxygen |
|                         | GO:0046872     | Metal ion binding                                                                                                             |
|                         | GO:0055114     | Oxidation-reduction process                                                                                                   |
| <i>Phvul.005G156900</i> | GO:0005515     | Protein binding                                                                                                               |
|                         | GO:0016702     | Oxidoreductase activity, acting on single donors with incorporation of molecular oxygen, incorporation of two atoms of oxygen |
|                         | GO:0046872     | Metal ion binding                                                                                                             |
|                         | GO:0055114     | Oxidation-reduction process                                                                                                   |
| <i>Phvul.006G034000</i> | GO:0003824     | Catalytic activity                                                                                                            |
|                         | GO:0003854     | 3- $\beta$ -hydroxy- $\Delta$ 5-steroid dehydrogenase activity                                                                |
|                         | GO:0006694     | Steroid biosynthetic process                                                                                                  |
|                         | GO:0008831     | dTDP-4-dehydrorhamnose reductase activity                                                                                     |
|                         | GO:0009058     | Biosynthetic process                                                                                                          |
|                         | GO:0044237     | Cellular metabolic process                                                                                                    |
|                         | GO:0045226     | Extracellular polysaccharide biosynthetic process                                                                             |



**Table S53 continued**

| <b>Gene ID</b>          | <b>GO term</b> | <b>Description</b>                                                                                                            |
|-------------------------|----------------|-------------------------------------------------------------------------------------------------------------------------------|
|                         | GO:0050662     | Coenzyme binding                                                                                                              |
|                         | GO:0055114     | Oxidation-reduction process                                                                                                   |
| <i>Phvul.006G064100</i> | GO:0004645     | 1,4- $\alpha$ -Oligoglucan phosphorylase activity                                                                             |
|                         | GO:0005975     | Carbohydrate metabolic process                                                                                                |
| <i>Phvul.006G151300</i> | GO:0004553     | Hydrolase activity, hydrolyzing <i>O</i> -glycosyl compounds                                                                  |
|                         | GO:0005975     | Carbohydrate metabolic process                                                                                                |
| <i>Phvul.006G151400</i> | GO:0004553     | Hydrolase activity, hydrolyzing <i>O</i> -glycosyl compounds                                                                  |
|                         | GO:0005975     | Carbohydrate metabolic process                                                                                                |
| <i>Phvul.006G207600</i> | GO:0031072     | Heat shock protein binding                                                                                                    |
| <i>Phvul.007G135800</i> | GO:0008152     | Metabolic process                                                                                                             |
|                         | GO:0016758     | Transferase activity, transferring hexosyl groups                                                                             |
| <i>Phvul.009G002200</i> | GO:0004044     | Amidophosphoribosyltransferase activity                                                                                       |
|                         | GO:0008152     | Metabolic process                                                                                                             |
|                         | GO:0009113     | Purine nucleobase biosynthetic process                                                                                        |
|                         | GO:0009116     | Nucleoside metabolic process                                                                                                  |
| <i>Phvul.010G134900</i> | GO:0005515     | Protein binding                                                                                                               |
|                         | GO:0016702     | Oxidoreductase activity, acting on single donors with incorporation of molecular oxygen, incorporation of two atoms of oxygen |
|                         | GO:0046872     | Metal ion binding                                                                                                             |
|                         | GO:0055114     | Oxidation-reduction process                                                                                                   |
| <i>Phvul.010G135000</i> | GO:0005515     | Protein binding                                                                                                               |
|                         | GO:0016702     | Oxidoreductase activity, acting on single donors with incorporation of molecular oxygen, incorporation of two atoms of oxygen |
|                         | GO:0046872     | Metal ion binding                                                                                                             |
|                         | GO:0055114     | Oxidation-reduction process                                                                                                   |
| <i>Phvul.010G162600</i> | GO:0031072     | Heat shock protein binding                                                                                                    |
| <i>Phvul.011G056500</i> | GO:0005515     | Protein binding                                                                                                               |
|                         | GO:0016702     | Oxidoreductase activity, acting on single donors with incorporation of molecular oxygen, incorporation of two atoms of oxygen |
|                         | GO:0046872     | Metal ion binding                                                                                                             |
|                         | GO:0055114     | Oxidation-reduction process                                                                                                   |
| <i>Phvul.011G085200</i> | GO:0004553     | Hydrolase activity, hydrolyzing <i>O</i> -glycosyl compounds                                                                  |
|                         | GO:0005618     | Cell wall                                                                                                                     |
|                         | GO:0005975     | Carbohydrate metabolic process                                                                                                |
|                         | GO:0006073     | Cellular glucan metabolic process                                                                                             |
|                         | GO:0016762     | Xyloglucan:xyloglucosyl transferase activity                                                                                  |

**Table S53 continued**

| <b>Gene ID</b>          | <b>GO term</b> | <b>Description</b>                                           |
|-------------------------|----------------|--------------------------------------------------------------|
|                         | GO:0048046     | Apoplast                                                     |
| <i>Phvul.011G138600</i> | GO:0008152     | Metabolic process                                            |
|                         | GO:0016758     | Transferase activity, transferring hexosyl groups            |
| <i>Phvul.011G167000</i> | GO:0004553     | Hydrolase activity, hydrolyzing <i>O</i> -glycosyl compounds |
|                         | GO:0005975     | Carbohydrate metabolic process                               |

**Table S54. Gene ontology (GO) terms enriched across the differentially expressed genes of the CBB-resistant RIL at 24 h post-inoculation with *Xanthomonas axonopodis* (Xap)**

| Gene ID                 | GO term    | Description                                |
|-------------------------|------------|--------------------------------------------|
| <i>Phvul.001G203300</i> | GO:0009055 | Electron transfer activity                 |
|                         | GO:0015035 | Protein disulfide oxidoreductase activity  |
|                         | GO:0045454 | Cell redox homeostasis                     |
| <i>Phvul.002G275000</i> | GO:0003677 | DNA binding                                |
|                         | GO:0006355 | Regulation of transcription, DNA-templated |
| <i>Phvul.002G297100</i> | GO:0003700 | DNA-binding transcription factor activity  |
|                         | GO:0006355 | Regulation of transcription, DNA-templated |
|                         | GO:0043565 | Sequence-specific DNA binding              |
| <i>Phvul.003G212700</i> | GO:0003700 | DNA-binding transcription factor activity  |
|                         | GO:0006355 | Regulation of transcription, DNA-templated |
| <i>Phvul.003G292400</i> | GO:0003700 | DNA-binding transcription factor activity  |
|                         | GO:0006355 | Regulation of transcription, DNA-templated |
| <i>Phvul.006G111700</i> | GO:0003700 | DNA-binding transcription factor activity  |
|                         | GO:0006355 | Regulation of transcription, DNA-templated |
|                         | GO:0043565 | Sequence-specific DNA binding              |
| <i>Phvul.006G183100</i> | GO:0003700 | DNA-binding transcription factor activity  |
| <i>Phvul.007G066500</i> | GO:0003700 | DNA-binding transcription factor activity  |
|                         | GO:0006355 | Regulation of transcription, DNA-templated |
| <i>Phvul.007G273400</i> | GO:0003677 | DNA binding                                |
| <i>Phvul.008G235100</i> | GO:0005509 | Calcium ion binding                        |
|                         | GO:0005578 | Extracellular matrix                       |
|                         | GO:0007165 | Signal transduction                        |
| <i>Phvul.009G089300</i> | GO:0003700 | DNA-binding transcription factor activity  |
|                         | GO:0006355 | Regulation of transcription, DNA-templated |
| <i>Phvul.010G062500</i> | GO:0003700 | DNA-binding transcription factor activity  |
|                         | GO:0006355 | Regulation of transcription, DNA-templated |
|                         | GO:0043565 | Sequence-specific DNA binding              |
| <i>Phvul.010G111900</i> | GO:0003700 | DNA-binding transcription factor activity  |
|                         | GO:0006355 | Regulation of transcription, DNA-templated |
|                         | GO:0043565 | Sequence-specific DNA binding              |
| <i>Phvul.010G120700</i> | GO:0003677 | DNA binding                                |
|                         | GO:0006355 | Regulation of transcription, DNA-templated |
| <i>Phvul.011G095500</i> | GO:0003677 | DNA binding                                |
|                         | GO:0006355 | Regulation of transcription, DNA-templated |

**Table S55. Gene ontology (GO) terms enriched across the differentially expressed genes of the CBB-resistant RIL at 48 h post-inoculation with *Xanthomonas axonopodis* (Xap)**

| Gene ID                 | GO term    | Description                                                                 |
|-------------------------|------------|-----------------------------------------------------------------------------|
| <i>Phvul.001G039900</i> | GO:0003700 | DNA-binding transcription factor activity                                   |
|                         | GO:0006355 | Regulation of transcription, DNA-templated                                  |
|                         | GO:0043565 | Sequence-specific DNA binding                                               |
| <i>Phvul.001G040000</i> | GO:0004672 | Protein kinase activity                                                     |
|                         | GO:0005488 | Binding                                                                     |
|                         | GO:0005524 | ATP binding                                                                 |
|                         | GO:0006468 | Protein phosphorylation                                                     |
| <i>Phvul.001G040300</i> | GO:0004672 | Protein kinase activity                                                     |
|                         | GO:0005488 | Binding                                                                     |
|                         | GO:0005524 | ATP binding                                                                 |
|                         | GO:0006468 | Protein phosphorylation                                                     |
| <i>Phvul.001G040700</i> | GO:0004672 | Protein kinase activity                                                     |
|                         | GO:0005488 | Binding                                                                     |
|                         | GO:0005524 | ATP binding                                                                 |
|                         | GO:0006468 | Protein phosphorylation                                                     |
| <i>Phvul.001G042100</i> | GO:0003700 | DNA-binding transcription factor activity                                   |
|                         | GO:0006355 | Regulation of transcription, DNA-templated                                  |
|                         | GO:0043565 | Sequence-specific DNA binding                                               |
| <i>Phvul.001G042200</i> | GO:0003700 | DNA-binding transcription factor activity                                   |
|                         | GO:0006355 | Regulation of transcription, DNA-templated                                  |
|                         | GO:0043565 | Sequence-specific DNA binding                                               |
| <i>Phvul.001G088200</i> | GO:0003700 | DNA-binding transcription factor activity                                   |
|                         | GO:0006355 | Regulation of transcription, DNA-templated                                  |
|                         | GO:0043565 | Sequence-specific DNA binding                                               |
| <i>Phvul.001G112400</i> | GO:0016747 | Transferase activity, transferring acyl groups other than amino-acyl groups |
| <i>Phvul.001G131000</i> | GO:0003700 | DNA-binding transcription factor activity                                   |
|                         | GO:0005634 | Nucleus                                                                     |
|                         | GO:0006355 | Regulation of transcription, DNA-templated                                  |
|                         | GO:0043565 | Sequence-specific DNA binding                                               |
| <i>Phvul.001G142000</i> | GO:0009790 | Embryo development                                                          |
| <i>Phvul.001G160100</i> | GO:0003700 | DNA-binding transcription factor activity                                   |
|                         | GO:0006355 | Regulation of transcription, DNA-templated                                  |
| <i>Phvul.001G164900</i> | GO:0005634 | Nucleus                                                                     |
|                         | GO:0006355 | Regulation of transcription, DNA-templated                                  |
| <i>Phvul.001G192000</i> | GO:0003677 | DNA binding                                                                 |
|                         | GO:0006355 | Regulation of transcription, DNA-templated                                  |

**Table S55 continued**

| <b>Gene ID</b>          | <b>GO term</b> | <b>Description</b>                                                                                    |
|-------------------------|----------------|-------------------------------------------------------------------------------------------------------|
| <i>Phvul.002G014700</i> | GO:0009055     | Electron transfer activity                                                                            |
|                         | GO:0016705     | Oxidoreductase activity, acting on paired donors, with incorporation or reduction of molecular oxygen |
|                         | GO:0020037     | Heme binding                                                                                          |
|                         | GO:0055114     | Oxidation-reduction process                                                                           |
| <i>Phvul.002G019100</i> | GO:0003700     | DNA-binding transcription factor activity                                                             |
|                         | GO:0005634     | Nucleus                                                                                               |
|                         | GO:0006355     | Regulation of transcription, DNA-templated                                                            |
|                         | GO:0043565     | Sequence-specific DNA binding                                                                         |
| <i>Phvul.002G025000</i> | GO:0009055     | Electron transfer activity                                                                            |
|                         | GO:0016705     | Oxidoreductase activity, acting on paired donors, with incorporation or reduction of molecular oxygen |
|                         | GO:0020037     | Heme binding                                                                                          |
|                         | GO:0055114     | Oxidation-reduction process                                                                           |
| <i>Phvul.002G038600</i> | GO:0004315     | 3-Oxoacyl-[acyl-carrier-protein] synthase activity                                                    |
|                         | GO:0006633     | Fatty acid biosynthetic process                                                                       |
|                         | GO:0008415     | Transferase activity, transferring acyl groups                                                        |
|                         | GO:0016020     | Membrane                                                                                              |
| <i>Phvul.002G038700</i> | GO:0004315     | 3-Oxoacyl-[acyl-carrier-protein] synthase activity                                                    |
|                         | GO:0006633     | Fatty acid biosynthetic process                                                                       |
|                         | GO:0008415     | Transferase activity, transferring acyl groups                                                        |
|                         | GO:0016020     | Membrane                                                                                              |
| <i>Phvul.002G038800</i> | GO:0008415     | Transferase activity, transferring acyl groups                                                        |
|                         | GO:0008610     | Lipid biosynthetic process                                                                            |
| <i>Phvul.002G038900</i> | GO:0004315     | 3-Oxoacyl-[acyl-carrier-protein] synthase activity                                                    |
|                         | GO:0006633     | Fatty acid biosynthetic process                                                                       |
|                         | GO:0008415     | Transferase activity, transferring acyl groups                                                        |
|                         | GO:0016020     | Membrane                                                                                              |
| <i>Phvul.002G039000</i> | GO:0008415     | Transferase activity, transferring acyl groups                                                        |
|                         | GO:0008610     | Lipid biosynthetic process                                                                            |
| <i>Phvul.002G039100</i> | GO:0004315     | 3-Oxoacyl-[acyl-carrier-protein] synthase activity                                                    |
|                         | GO:0006633     | Fatty acid biosynthetic process                                                                       |
|                         | GO:0008415     | Transferase activity, transferring acyl groups                                                        |
|                         | GO:0016020     | Membrane                                                                                              |
| <i>Phvul.002G039300</i> | GO:0004315     | 3-Oxoacyl-[acyl-carrier-protein] synthase activity                                                    |
|                         | GO:0006633     | Fatty acid biosynthetic process                                                                       |
|                         | GO:0008415     | Transferase activity, transferring acyl groups                                                        |
|                         | GO:0016020     | Membrane                                                                                              |

**Table S55 continued**

| <b>Gene ID</b>          | <b>GO term</b> | <b>Description</b>                                                                    |
|-------------------------|----------------|---------------------------------------------------------------------------------------|
| <i>Phvul.002G044100</i> | GO:0008080     | N-Acetyltransferase activity                                                          |
|                         | GO:0008152     | Metabolic process                                                                     |
| <i>Phvul.002G046100</i> | GO:0004672     | Protein kinase activity                                                               |
|                         | GO:0005524     | ATP binding                                                                           |
|                         | GO:0005529     | Carbohydrate binding                                                                  |
|                         | GO:0006468     | Protein phosphorylation                                                               |
| <i>Phvul.002G046500</i> | GO:0004672     | Protein kinase activity                                                               |
|                         | GO:0005524     | ATP binding                                                                           |
|                         | GO:0005529     | Carbohydrate binding                                                                  |
|                         | GO:0006468     | Protein phosphorylation                                                               |
| <i>Phvul.002G076500</i> | GO:0004222     | Metalloendopeptidase activity                                                         |
|                         | GO:0006508     | Proteolysis                                                                           |
|                         | GO:0008152     | Metabolic process                                                                     |
|                         | GO:0008270     | Zinc ion binding                                                                      |
| <i>Phvul.002G076600</i> | GO:0004222     | Metalloendopeptidase activity                                                         |
|                         | GO:0006508     | Proteolysis                                                                           |
|                         | GO:0008152     | Metabolic process                                                                     |
|                         | GO:0008270     | Zinc ion binding                                                                      |
| <i>Phvul.002G144600</i> | GO:0008270     | Zinc ion binding                                                                      |
|                         | GO:0016616     | Oxidoreductase activity, acting on the CH-OH group of donors, NAD or NADP as acceptor |
|                         | GO:0048037     | Cofactor binding                                                                      |
|                         | GO:0055114     | Oxidation-reduction process                                                           |
| <i>Phvul.002G154600</i> | GO:0006855     | Drug transmembrane transport                                                          |
|                         | GO:0015238     | Xenobiotic transmembrane transporter activity                                         |
|                         | GO:0015297     | Antiporter activity                                                                   |
|                         | GO:0016020     | Membrane                                                                              |
| <i>Phvul.002G184300</i> | GO:0004315     | 3-Oxoacyl-[acyl-carrier-protein] synthase activity                                    |
|                         | GO:0006633     | Fatty acid biosynthetic process                                                       |
|                         | GO:0008415     | Transferase activity, transferring acyl groups                                        |
|                         | GO:0016020     | Membrane                                                                              |
| <i>Phvul.002G199800</i> | GO:0008762     | UDP-N-acetylmuramate dehydrogenase activity                                           |
|                         | GO:0016491     | Oxidoreductase activity                                                               |
|                         | GO:0050660     | Flavin adenine dinucleotide binding                                                   |
|                         | GO:0055114     | Oxidation-reduction process                                                           |
| <i>Phvul.002G200600</i> | GO:0008762     | UDP-N-acetylmuramate dehydrogenase activity                                           |
|                         | GO:0016491     | Oxidoreductase activity                                                               |
|                         | GO:0050660     | Flavin adenine dinucleotide binding                                                   |
|                         | GO:0055114     | Oxidation-reduction process                                                           |

**Table S55 continued**

| <b>Gene ID</b>          | <b>GO term</b> | <b>Description</b>                            |
|-------------------------|----------------|-----------------------------------------------|
| <i>Phvul.002G209400</i> | GO:0006952     | Defense response                              |
|                         | GO:0009607     | Response to biotic stimulus                   |
| <i>Phvul.002G209500</i> | GO:0006952     | Defense response                              |
|                         | GO:0009607     | Response to biotic stimulus                   |
| <i>Phvul.002G215000</i> | GO:0004672     | Protein kinase activity                       |
|                         | GO:0005488     | Binding                                       |
|                         | GO:0005524     | ATP binding                                   |
|                         | GO:0006468     | Protein phosphorylation                       |
| <i>Phvul.002G215100</i> | GO:0004672     | Protein kinase activity                       |
|                         | GO:0005515     | Protein binding                               |
|                         | GO:0005524     | ATP binding                                   |
|                         | GO:0006468     | Protein phosphorylation                       |
| <i>Phvul.002G217900</i> | GO:0004672     | Protein kinase activity                       |
|                         | GO:0005515     | Protein binding                               |
|                         | GO:0005524     | ATP binding                                   |
|                         | GO:0006468     | Protein phosphorylation                       |
| <i>Phvul.002G219300</i> | GO:0000287     | Magnesium ion binding                         |
|                         | GO:0008152     | Metabolic process                             |
|                         | GO:0010333     | Terpene synthase activity                     |
|                         | GO:0016829     | Lyase activity                                |
| <i>Phvul.002G223400</i> | GO:0016491     | Oxidoreductase activity                       |
|                         | GO:0050660     | Flavin adenine dinucleotide binding           |
|                         | GO:0055114     | Oxidation-reduction process                   |
|                         | GO:0004672     | Protein kinase activity                       |
|                         | GO:0005515     | Protein binding                               |
|                         | GO:0005524     | ATP binding                                   |
|                         | GO:0006468     | Protein phosphorylation                       |
| <i>Phvul.002G265400</i> | GO:0003700     | DNA-binding transcription factor activity     |
|                         | GO:0006355     | Regulation of transcription, DNA-templated    |
|                         | GO:0043565     | Sequence-specific DNA binding                 |
| <i>Phvul.002G285800</i> | GO:0003700     | DNA-binding transcription factor activity     |
|                         | GO:0006355     | Regulation of transcription, DNA-templated    |
|                         | GO:0043565     | Sequence-specific DNA binding                 |
| <i>Phvul.002G318200</i> | GO:0004672     | Protein kinase activity                       |
|                         | GO:0005524     | ATP binding                                   |
|                         | GO:0006468     | Protein phosphorylation                       |
| <i>Phvul.002G326600</i> | GO:0016491     | Oxidoreductase activity                       |
|                         | GO:0016706     | 2-Oxoglutarate-dependent dioxygenase activity |
|                         | GO:0055114     | Oxidation-reduction process                   |

**Table S55 continued**

| <b>Gene ID</b>          | <b>GO term</b> | <b>Description</b>                                                                                    |
|-------------------------|----------------|-------------------------------------------------------------------------------------------------------|
| <i>Phvul.003G009200</i> | GO:0009055     | Electron transfer activity                                                                            |
|                         | GO:0016705     | Oxidoreductase activity, acting on paired donors, with incorporation or reduction of molecular oxygen |
|                         | GO:0020037     | Heme binding                                                                                          |
|                         | GO:0055114     | Oxidation-reduction process                                                                           |
| <i>Phvul.003G022400</i> | GO:0030001     | Metal ion transport                                                                                   |
|                         | GO:0046872     | Metal ion binding                                                                                     |
| <i>Phvul.003G024200</i> | GO:0000166     | Nucleotide binding                                                                                    |
|                         | GO:0003824     | Catalytic activity                                                                                    |
|                         | GO:0008152     | Metabolic process                                                                                     |
|                         | GO:0046872     | Metal ion binding                                                                                     |
| <i>Phvul.003G051700</i> | GO:0009055     | Electron transfer activity                                                                            |
|                         | GO:0016705     | Oxidoreductase activity, acting on paired donors, with incorporation or reduction of molecular oxygen |
|                         | GO:0020037     | Heme binding                                                                                          |
|                         | GO:0055114     | Oxidation-reduction process                                                                           |
| <i>Phvul.003G051900</i> | GO:0005507     | Copper ion binding                                                                                    |
| <i>Phvul.003G074000</i> | GO:0009055     | Electron transfer activity                                                                            |
|                         | GO:0009055     | Electron transfer activity                                                                            |
|                         | GO:0016705     | Oxidoreductase activity, acting on paired donors, with incorporation or reduction of molecular oxygen |
|                         | GO:0020037     | Heme binding                                                                                          |
|                         | GO:0055114     | Oxidation-reduction process                                                                           |
| <i>Phvul.003G088000</i> | GO:0006950     | Response to stress                                                                                    |
| <i>Phvul.003G096700</i> | GO:0006950     | Response to stress                                                                                    |
| <i>Phvul.003G109000</i> | GO:0006952     | Defense response                                                                                      |
|                         | GO:0009607     | Response to biotic stimulus                                                                           |
| <i>Phvul.003G109100</i> | GO:0006952     | Defense response                                                                                      |
|                         | GO:0009607     | Response to biotic stimulus                                                                           |
| <i>Phvul.003G109200</i> | GO:0006952     | Defense response                                                                                      |
|                         | GO:0009607     | Response to biotic stimulus                                                                           |
| <i>Phvul.003G109300</i> | GO:0006952     | Defense response                                                                                      |
|                         | GO:0009607     | Response to biotic stimulus                                                                           |
| <i>Phvul.003G109600</i> | GO:0006952     | Defense response                                                                                      |
|                         | GO:0009607     | Response to biotic stimulus                                                                           |
| <i>Phvul.003G109800</i> | GO:0006952     | Defense response                                                                                      |
|                         | GO:0009607     | Response to biotic stimulus                                                                           |
| <i>Phvul.003G126300</i> | GO:0016491     | Oxidoreductase activity                                                                               |
|                         | GO:0055114     | Oxidation-reduction process                                                                           |



**Table S55 continued**

| <b>Gene ID</b>          | <b>GO term</b> | <b>Description</b>                                                                    |
|-------------------------|----------------|---------------------------------------------------------------------------------------|
| <i>Phvul.003G131500</i> | GO:0010181     | FMN binding                                                                           |
|                         | GO:0016491     | Oxidoreductase activity                                                               |
|                         | GO:0055114     | Oxidation-reduction process                                                           |
| <i>Phvul.003G136400</i> | GO:0008762     | UDP-N-acetylmuramate dehydrogenase activity                                           |
|                         | GO:0009690     | Cytokinin metabolic process                                                           |
|                         | GO:0016491     | Oxidoreductase activity                                                               |
|                         | GO:0050660     | Flavin adenine dinucleotide binding                                                   |
| <i>Phvul.003G140800</i> | GO:0006355     | Regulation of transcription, DNA-templated                                            |
|                         | GO:0030528     | Transcription regulator activity                                                      |
| <i>Phvul.003G154800</i> | GO:0000902     | Cell morphogenesis                                                                    |
|                         | GO:0005524     | ATP binding                                                                           |
| <i>Phvul.003G166700</i> | GO:0005507     | Copper ion binding                                                                    |
|                         | GO:0009055     | Electron transfer activity                                                            |
| <i>Phvul.003G166800</i> | GO:0005507     | Copper ion binding                                                                    |
|                         | GO:0009055     | Electron transfer activity                                                            |
| <i>Phvul.003G182600</i> | GO:0006950     | Response to stress                                                                    |
| <i>Phvul.003G187200</i> | GO:0004672     | Protein kinase activity                                                               |
|                         | GO:0005515     | Protein binding                                                                       |
|                         | GO:0005524     | ATP binding                                                                           |
|                         | GO:0006468     | Protein phosphorylation                                                               |
| <i>Phvul.003G212600</i> | GO:0006855     | Drug transmembrane transport                                                          |
|                         | GO:0015238     | Xenobiotic transmembrane transporter activity                                         |
|                         | GO:0015297     | Antiporter activity                                                                   |
|                         | GO:0016020     | Membrane                                                                              |
| <i>Phvul.003G272900</i> | GO:0003824     | Catalytic activity                                                                    |
|                         | GO:0016616     | Oxidoreductase activity, acting on the CH-OH group of donors, NAD or NADP as acceptor |
|                         | GO:0044237     | Cellular metabolic process                                                            |
|                         | GO:0050662     | Coenzyme binding                                                                      |
| <i>Phvul.003G287400</i> | GO:0008270     | Zinc ion binding                                                                      |
|                         | GO:0016491     | Oxidoreductase activity                                                               |
|                         | GO:0055114     | Oxidation-reduction process                                                           |
| <i>Phvul.003G287500</i> | GO:0008270     | Zinc ion binding                                                                      |
|                         | GO:0016491     | Oxidoreductase activity                                                               |
|                         | GO:0055114     | Oxidation-reduction process                                                           |
| <i>Phvul.004G018900</i> | GO:0004601     | Peroxidase activity                                                                   |
|                         | GO:0006979     | Response to oxidative stress                                                          |
|                         | GO:0020037     | Heme binding                                                                          |
|                         | GO:0055114     | Oxidation-reduction process                                                           |

**Table S55 continued**

| <b>Gene ID</b>          | <b>GO term</b> | <b>Description</b>                                                          |
|-------------------------|----------------|-----------------------------------------------------------------------------|
| <i>Phvul.004G077400</i> | GO:0003677     | DNA binding                                                                 |
|                         | GO:0006355     | Regulation of transcription, DNA-templated                                  |
| <i>Phvul.004G092100</i> | GO:0003700     | DNA-binding transcription factor activity                                   |
|                         | GO:0006355     | Regulation of transcription, DNA-templated                                  |
| <i>Phvul.004G122000</i> | GO:0003700     | DNA-binding transcription factor activity                                   |
|                         | GO:0006355     | Regulation of transcription, DNA-templated                                  |
| <i>Phvul.004G141200</i> | GO:0008060     | GTPase activator activity                                                   |
|                         | GO:0008270     | Zinc ion binding                                                            |
|                         | GO:0032312     | Transcription regulator activity                                            |
| <i>Phvul.005G011100</i> | GO:0000166     | Nucleotide binding                                                          |
|                         | GO:0003824     | Catalytic activity                                                          |
|                         | GO:0008152     | Metabolic process                                                           |
|                         | GO:0046872     | Metal ion binding                                                           |
| <i>Phvul.005G108900</i> | GO:0016747     | Transferase activity, transferring acyl groups other than amino-acyl groups |
| <i>Phvul.005G109000</i> | GO:0016747     | Transferase activity, transferring acyl groups other than amino-acyl groups |
| <i>Phvul.005G111500</i> | GO:0000287     | Magnesium ion binding                                                       |
|                         | GO:0008152     | Metabolic process                                                           |
|                         | GO:0010333     | Terpene synthase activity                                                   |
|                         | GO:0016829     | Lyase activity                                                              |
| <i>Phvul.005G113800</i> | GO:0004601     | Peroxidase activity                                                         |
|                         | GO:0006979     | Response to oxidative stress                                                |
|                         | GO:0020037     | Heme binding                                                                |
|                         | GO:0055114     | Oxidation-reduction process                                                 |
| <i>Phvul.005G155800</i> | GO:0004568     | Chitinase activity                                                          |
|                         | GO:0006032     | Chitin catabolic process                                                    |
|                         | GO:0008061     | Chitin binding                                                              |
|                         | GO:0016998     | Cell wall macromolecule catabolic process                                   |
| <i>Phvul.005G173000</i> | GO:0005634     | Nucleus                                                                     |
|                         | GO:0006355     | Regulation of transcription, DNA-templated                                  |
| <i>Phvul.006G020700</i> | GO:0004672     | Protein kinase activity                                                     |
|                         | GO:0005524     | ATP binding                                                                 |
|                         | GO:0006468     | Protein phosphorylation                                                     |
| <i>Phvul.006G074600</i> | GO:0003700     | DNA-binding transcription factor activity                                   |
|                         | GO:0006355     | Regulation of transcription, DNA-templated                                  |
|                         | GO:0043565     | Sequence-specific DNA binding                                               |

**Table S55 continued**

| <b>Gene ID</b>          | <b>GO term</b> | <b>Description</b>                                                                                                            |
|-------------------------|----------------|-------------------------------------------------------------------------------------------------------------------------------|
| <i>Phvul.006G079700</i> | GO:0009055     | Electron transfer activity                                                                                                    |
|                         | GO:0016705     | Oxidoreductase activity, acting on paired donors, with incorporation or reduction of molecular oxygen                         |
|                         | GO:0020037     | Heme binding                                                                                                                  |
|                         | GO:0055114     | Oxidation-reduction process                                                                                                   |
| <i>Phvul.006G090200</i> | GO:0005506     | Iron ion binding                                                                                                              |
|                         | GO:0016021     | Integral component of membrane                                                                                                |
|                         | GO:0050660     | Flavin adenine dinucleotide binding                                                                                           |
|                         | GO:0050664     | Oxidoreductase activity, acting on NAD(P)H, oxygen as acceptor                                                                |
| <i>Phvul.006G102200</i> | GO:0008061     | Chitin binding                                                                                                                |
|                         | GO:0042742     | Defense response to bacterium                                                                                                 |
|                         | GO:0050832     | Defense response to fungus                                                                                                    |
| <i>Phvul.006G102300</i> | GO:0042742     | Defense response to bacterium                                                                                                 |
|                         | GO:0050832     | Defense response to fungus                                                                                                    |
| <i>Phvul.006G124600</i> | GO:0008762     | UDP-N-acetylmuramate dehydrogenase activity                                                                                   |
|                         | GO:0016491     | Oxidoreductase activity                                                                                                       |
|                         | GO:0050660     | Flavin adenine dinucleotide binding                                                                                           |
|                         | GO:0055114     | Oxidation-reduction process                                                                                                   |
| <i>Phvul.006G124700</i> | GO:0008762     | UDP-N-acetylmuramate dehydrogenase activity                                                                                   |
|                         | GO:0016491     | Oxidoreductase activity                                                                                                       |
|                         | GO:0050660     | Flavin adenine dinucleotide binding                                                                                           |
|                         | GO:0055114     | Oxidation-reduction process                                                                                                   |
| <i>Phvul.006G129500</i> | GO:0004601     | Peroxidase activity                                                                                                           |
|                         | GO:0006979     | Response to oxidative stress                                                                                                  |
|                         | GO:0020037     | Heme binding                                                                                                                  |
|                         | GO:0055114     | Oxidation-reduction process                                                                                                   |
| <i>Phvul.006G135600</i> | GO:0030001     | Metal ion transport                                                                                                           |
|                         | GO:0046872     | Metal ion binding                                                                                                             |
| <i>Phvul.006G181300</i> | GO:0009055     | Electron transfer activity                                                                                                    |
|                         | GO:0015035     | Protein disulfide oxidoreductase activity                                                                                     |
|                         | GO:0045454     | Cell redox homeostasis                                                                                                        |
|                         | GO:0016702     | Oxidoreductase activity, acting on single donors with incorporation of molecular oxygen, incorporation of two atoms of oxygen |
|                         | GO:0046872     | Metal ion binding                                                                                                             |
|                         | GO:0055114     | Oxidation-reduction process                                                                                                   |
| <i>Phvul.006G188900</i> | GO:0003677     | DNA binding                                                                                                                   |
|                         | GO:0006355     | Regulation of transcription, DNA-templated                                                                                    |

**Table S55 continued**

| <b>Gene ID</b>          | <b>GO term</b> | <b>Description</b>                       |
|-------------------------|----------------|------------------------------------------|
| <i>Phvul.006G192400</i> | GO:0016491     | Oxidoreductase activity                  |
|                         | GO:0050660     | Flavin adenine dinucleotide binding      |
|                         | GO:0055114     | Oxidation-reduction process              |
| <i>Phvul.006G194600</i> | GO:0004674     | Protein serine/threonine kinase activity |
|                         | GO:0005524     | ATP binding                              |
|                         | GO:0005529     | Carbohydrate binding                     |
|                         | GO:0006468     | Protein phosphorylation                  |
| <i>Phvul.006G195600</i> | GO:0000287     | Magnesium ion binding                    |
|                         | GO:0008152     | Metabolic process                        |
|                         | GO:0010333     | Terpene synthase activity                |
|                         | GO:0016829     | Lyase activity                           |
| <i>Phvul.006G195700</i> | GO:0000287     | Magnesium ion binding                    |
|                         | GO:0008152     | Metabolic process                        |
|                         | GO:0010333     | Terpene synthase activity                |
|                         | GO:0016829     | Lyase activity                           |
| <i>Phvul.006G198200</i> | GO:0004672     | Protein kinase activity                  |
|                         | GO:0005515     | Protein binding                          |
|                         | GO:0005524     | ATP binding                              |
|                         | GO:0006468     | Protein phosphorylation                  |
| <i>Phvul.007G048500</i> | GO:0004672     | Protein kinase activity                  |
|                         | GO:0005524     | ATP binding                              |
|                         | GO:0006468     | Protein phosphorylation                  |
| <i>Phvul.007G048600</i> | GO:0004672     | Protein kinase activity                  |
|                         | GO:0005524     | ATP binding                              |
|                         | GO:0006468     | Protein phosphorylation                  |
| <i>Phvul.007G048800</i> | GO:0004672     | Protein kinase activity                  |
|                         | GO:0005524     | ATP binding                              |
|                         | GO:0006468     | Protein phosphorylation                  |
| <i>Phvul.007G048900</i> | GO:0004672     | Protein kinase activity                  |
|                         | GO:0005524     | ATP binding                              |
|                         | GO:0006468     | Protein phosphorylation                  |
| <i>Phvul.007G049100</i> | GO:0004672     | Protein kinase activity                  |
|                         | GO:0005524     | ATP binding                              |
|                         | GO:0006468     | Protein phosphorylation                  |
| <i>Phvul.007G052500</i> | GO:0004672     | Protein kinase activity                  |
|                         | GO:0005524     | ATP binding                              |
|                         | GO:0006468     | Protein phosphorylation                  |

**Table S55 continued**

| <b>Gene ID</b>          | <b>GO term</b> | <b>Description</b>                                                          |
|-------------------------|----------------|-----------------------------------------------------------------------------|
| <i>Phvul.007G222500</i> | GO:0003700     | DNA-binding transcription factor activity                                   |
|                         | GO:0006355     | Regulation of transcription, DNA-templated                                  |
|                         | GO:0004672     | Protein kinase activity                                                     |
|                         | GO:0005524     | ATP binding                                                                 |
|                         | GO:0006468     | Protein phosphorylation                                                     |
| <i>Phvul.007G259400</i> | GO:0009790     | Embryo development                                                          |
| <i>Phvul.007G260400</i> | GO:0004672     | Protein kinase activity                                                     |
|                         | GO:0005488     | Binding                                                                     |
|                         | GO:0005524     | ATP binding                                                                 |
|                         | GO:0006468     | Protein phosphorylation                                                     |
| <i>Phvul.007G273000</i> | GO:0003700     | DNA-binding transcription factor activity                                   |
|                         | GO:0006355     | Regulation of transcription, DNA-templated                                  |
| <i>Phvul.007G278900</i> | GO:0005509     | Calcium ion binding                                                         |
|                         | GO:0005578     | Carbohydrate binding                                                        |
|                         | GO:0007165     | Signal transduction                                                         |
| <i>Phvul.008G011400</i> | GO:0000902     | Cell morphogenesis                                                          |
|                         | GO:0005524     | ATP binding                                                                 |
| <i>Phvul.008G011500</i> | GO:0047134     | Protein-disulfide reductase activity                                        |
|                         | GO:0055114     | Oxidation-reduction process                                                 |
| <i>Phvul.008G011800</i> | GO:0047134     | Protein-disulfide reductase activity                                        |
|                         | GO:0055114     | Oxidation-reduction process                                                 |
| <i>Phvul.008G011900</i> | GO:0000902     | Cell morphogenesis                                                          |
|                         | GO:0005524     | ATP binding                                                                 |
| <i>Phvul.008G015800</i> | GO:0016491     | Oxidoreductase activity                                                     |
|                         | GO:0055114     | Oxidation-reduction process                                                 |
| <i>Phvul.008G032200</i> | GO:0016747     | Transferase activity, transferring acyl groups other than amino-acyl groups |
| <i>Phvul.008G037300</i> | GO:0005509     | Calcium ion binding                                                         |
|                         | GO:0005578     | Carbohydrate binding                                                        |
|                         | GO:0007165     | Signal transduction                                                         |
| <i>Phvul.008G040800</i> | GO:0004222     | Metalloendopeptidase activity                                               |
|                         | GO:0006508     | Proteolysis                                                                 |
|                         | GO:0008270     | Zinc ion binding                                                            |
|                         | GO:0016021     | Integral component of membrane                                              |
| <i>Phvul.008G076300</i> | GO:0005506     | Iron ion binding                                                            |
|                         | GO:0006633     | Fatty acid biosynthetic process                                             |
|                         | GO:0016491     | Oxidoreductase activity                                                     |
|                         | GO:0055114     | Oxidation-reduction process                                                 |

**Table S55 continued**

| <b>Gene ID</b>          | <b>GO term</b> | <b>Description</b>                                                                    |
|-------------------------|----------------|---------------------------------------------------------------------------------------|
| <i>Phvul.008G076500</i> | GO:0006694     | Steroid biosynthetic process                                                          |
|                         | GO:0016616     | Oxidoreductase activity, acting on the CH-OH group of donors, NAD or NADP as acceptor |
|                         | GO:0044237     | Cellular metabolic process                                                            |
|                         | GO:0050662     | Coenzyme binding                                                                      |
| <i>Phvul.008G076600</i> | GO:0006694     | Steroid biosynthetic process                                                          |
|                         | GO:0016616     | Oxidoreductase activity, acting on the CH-OH group of donors, NAD or NADP as acceptor |
|                         | GO:0044237     | Cellular metabolic process                                                            |
|                         | GO:0050662     | Coenzyme binding                                                                      |
| <i>Phvul.008G094500</i> | GO:0004672     | Protein kinase activity                                                               |
|                         | GO:0005488     | Binding                                                                               |
|                         | GO:0005524     | ATP binding                                                                           |
|                         | GO:0006468     | Protein phosphorylation                                                               |
| <i>Phvul.008G098500</i> | GO:0016491     | Oxidoreductase activity                                                               |
|                         | GO:0016706     | 2-Oxoglutarate-dependent dioxygenase activity                                         |
|                         | GO:0055114     | Oxidation-reduction process                                                           |
| <i>Phvul.008G112200</i> | GO:0005507     | Copper ion binding                                                                    |
|                         | GO:0016491     | Oxidoreductase activity                                                               |
|                         | GO:0055114     | Oxidation-reduction process                                                           |
| <i>Phvul.008G127200</i> | GO:0016491     | Oxidoreductase activity                                                               |
|                         | GO:0016706     | 2-Oxoglutarate-dependent dioxygenase activity                                         |
|                         | GO:0055114     | Oxidation-reduction process                                                           |
| <i>Phvul.008G194600</i> | GO:0003677     | DNA binding                                                                           |
|                         | GO:0006355     | Regulation of transcription, DNA-templated                                            |
| <i>Phvul.008G218500</i> | GO:0004601     | Peroxidase activity                                                                   |
|                         | GO:0006979     | Response to oxidative stress                                                          |
|                         | GO:0020037     | Heme binding                                                                          |
|                         | GO:0055114     | Oxidation-reduction process                                                           |
| <i>Phvul.008G223500</i> | GO:0016491     | Oxidoreductase activity                                                               |
|                         | GO:0016706     | 2-Oxoglutarate-dependent dioxygenase activity                                         |
|                         | GO:0055114     | Oxidation-reduction process                                                           |
| <i>Phvul.008G248900</i> | GO:0004672     | Protein kinase activity                                                               |
|                         | GO:0005524     | ATP binding                                                                           |
|                         | GO:0006468     | Protein phosphorylation                                                               |
|                         | GO:0007165     | Signal transduction                                                                   |
| <i>Phvul.008G249900</i> | GO:0004601     | Peroxidase activity                                                                   |
|                         | GO:0006979     | Response to oxidative stress                                                          |
|                         | GO:0020037     | Heme binding                                                                          |
|                         | GO:0055114     | Oxidation-reduction process                                                           |

**Table S55 Continued**

| <b>Gene ID</b>          | <b>GO term</b> | <b>Description</b>                                                                                    |
|-------------------------|----------------|-------------------------------------------------------------------------------------------------------|
| <i>Phvul.008G285000</i> | GO:0000166     | Nucleotide binding                                                                                    |
|                         | GO:0046872     | Metal ion binding                                                                                     |
| <i>Phvul.008G287200</i> | GO:0016491     | Oxidoreductase activity                                                                               |
|                         | GO:0055114     | Oxidation-reduction process                                                                           |
| <i>Phvul.008G287300</i> | GO:0016491     | Oxidoreductase activity                                                                               |
|                         | GO:0055114     | Oxidation-reduction process                                                                           |
| <i>Phvul.009G043100</i> | GO:0003700     | DNA-binding transcription factor activity                                                             |
|                         | GO:0006355     | Regulation of transcription, DNA-templated                                                            |
|                         | GO:0043565     | Sequence-specific DNA binding                                                                         |
| <i>Phvul.009G043200</i> | GO:0003700     | DNA-binding transcription factor activity                                                             |
|                         | GO:0006355     | Regulation of transcription, DNA-templated                                                            |
|                         | GO:0043565     | Sequence-specific DNA binding                                                                         |
| <i>Phvul.009G046900</i> | GO:0004672     | Protein kinase activity                                                                               |
|                         | GO:0005515     | Protein binding                                                                                       |
|                         | GO:0005524     | ATP binding                                                                                           |
|                         | GO:0006468     | Protein phosphorylation                                                                               |
| <i>Phvul.009G080000</i> | GO:0003700     | DNA-binding transcription factor activity                                                             |
|                         | GO:0006355     | Regulation of transcription, DNA-templated                                                            |
|                         | GO:0043565     | Sequence-specific DNA binding                                                                         |
| <i>Phvul.009G087400</i> | GO:0003700     | DNA-binding transcription factor activity                                                             |
|                         | GO:0006355     | Regulation of transcription, DNA-templated                                                            |
|                         | GO:0043565     | Sequence-specific DNA binding                                                                         |
| <i>Phvul.009G089300</i> | GO:0003700     | DNA-binding transcription factor activity                                                             |
|                         | GO:0006355     | Regulation of transcription, DNA-templated                                                            |
| <i>Phvul.009G138900</i> | GO:0003700     | DNA-binding transcription factor activity                                                             |
|                         | GO:0006355     | Regulation of transcription, DNA-templated                                                            |
|                         | GO:0043565     | Sequence-specific DNA binding                                                                         |
| <i>Phvul.009G156300</i> | GO:0003677     | DNA binding                                                                                           |
|                         | GO:0006355     | Regulation of transcription, DNA-templated                                                            |
| <i>Phvul.009G182300</i> | GO:0016491     | Oxidoreductase activity                                                                               |
|                         | GO:0055114     | Oxidation-reduction process                                                                           |
| <i>Phvul.009G231600</i> | GO:0006355     | Regulation of transcription, DNA-templated                                                            |
|                         | GO:0030528     | Transcription regulator activity                                                                      |
| <i>Phvul.009G235700</i> | GO:0006355     | Regulation of transcription, DNA-templated                                                            |
|                         | GO:0030528     | Transcription regulator activity                                                                      |
| <i>Phvul.009G244100</i> | GO:0009055     | Electron transfer activity                                                                            |
|                         | GO:0016705     | Oxidoreductase activity, acting on paired donors, with incorporation or reduction of molecular oxygen |

**Table S55 continued**

| <b>Gene ID</b>          | <b>GO term</b> | <b>Description</b>                                                                                                            |
|-------------------------|----------------|-------------------------------------------------------------------------------------------------------------------------------|
| <i>Phvul.009G244100</i> | GO:0020037     | Heme binding                                                                                                                  |
|                         | GO:0055114     | Oxidation-reduction process                                                                                                   |
| <i>Phvul.009G244200</i> | GO:0009055     | Electron transfer activity                                                                                                    |
|                         | GO:0016705     | Oxidoreductase activity, acting on paired donors, with incorporation or reduction of molecular oxygen                         |
|                         | GO:0020037     | Heme binding                                                                                                                  |
|                         | GO:0055114     | Oxidation-reduction process                                                                                                   |
| <i>Phvul.009G262900</i> | GO:0005515     | Protein binding                                                                                                               |
|                         | GO:0016702     | Oxidoreductase activity, acting on single donors with incorporation of molecular oxygen, incorporation of two atoms of oxygen |
|                         | GO:0046872     | Metal ion binding                                                                                                             |
|                         | GO:0055114     | Oxidation-reduction process                                                                                                   |
| <i>Phvul.010G000300</i> | GO:0016491     | Oxidoreductase activity                                                                                                       |
|                         | GO:0016706     | 2-Oxoglutarate-dependent dioxygenase activity                                                                                 |
|                         | GO:0055114     | Oxidation-reduction process                                                                                                   |
| <i>Phvul.010G005900</i> | GO:0005507     | Copper ion binding                                                                                                            |
|                         | GO:0016491     | Oxidoreductase activity                                                                                                       |
|                         | GO:0055114     | Oxidation-reduction process                                                                                                   |
| <i>Phvul.010G032000</i> | GO:0004672     | Protein kinase activity                                                                                                       |
|                         | GO:0005524     | ATP binding                                                                                                                   |
|                         | GO:0005529     | Carbohydrate binding                                                                                                          |
|                         | GO:0006468     | Protein phosphorylation                                                                                                       |
| <i>Phvul.010G057300</i> | GO:0004672     | Protein kinase activity                                                                                                       |
|                         | GO:0005524     | ATP binding                                                                                                                   |
|                         | GO:0005529     | Carbohydrate binding                                                                                                          |
|                         | GO:0006468     | Protein phosphorylation                                                                                                       |
| <i>Phvul.010G057500</i> | GO:0004672     | Protein kinase activity                                                                                                       |
|                         | GO:0005524     | ATP binding                                                                                                                   |
|                         | GO:0005529     | Carbohydrate binding                                                                                                          |
|                         | GO:0006468     | Protein phosphorylation                                                                                                       |
| <i>Phvul.010G057600</i> | GO:0004672     | Protein kinase activity                                                                                                       |
|                         | GO:0005524     | ATP binding                                                                                                                   |
|                         | GO:0005529     | Carbohydrate binding                                                                                                          |
|                         | GO:0006468     | Protein phosphorylation                                                                                                       |
| <i>Phvul.010G111900</i> | GO:0003700     | DNA-binding transcription factor activity                                                                                     |
|                         | GO:0006355     | Regulation of transcription, DNA-templated                                                                                    |
|                         | GO:0043565     | Sequence-specific DNA binding                                                                                                 |



**Table S55 continued**

| <b>Gene ID</b>          | <b>GO term</b> | <b>Description</b>                                                                                    |
|-------------------------|----------------|-------------------------------------------------------------------------------------------------------|
| <i>Phvul.010G117200</i> | GO:0003700     | DNA-binding transcription factor activity                                                             |
|                         | GO:0005634     | Nucleus                                                                                               |
|                         | GO:0006355     | Regulation of transcription, DNA-templated                                                            |
|                         | GO:0043565     | Sequence-specific DNA binding                                                                         |
| <i>Phvul.010G128900</i> | GO:0009055     | Electron transfer activity                                                                            |
|                         | GO:0016705     | Oxidoreductase activity, acting on paired donors, with incorporation or reduction of molecular oxygen |
|                         | GO:0020037     | Heme binding                                                                                          |
|                         | GO:0055114     | Oxidation-reduction process                                                                           |
| <i>Phvul.011G013600</i> | GO:0000287     | Magnesium ion binding                                                                                 |
|                         | GO:0008152     | Metabolic process                                                                                     |
|                         | GO:0010333     | Terpene synthase activity                                                                             |
|                         | GO:0016829     | Lyase activity                                                                                        |
| <i>Phvul.011G035600</i> | GO:0004672     | Protein kinase activity                                                                               |
|                         | GO:0005524     | ATP binding                                                                                           |
|                         | GO:0006468     | Protein phosphorylation                                                                               |
| <i>Phvul.011G041400</i> | GO:0004672     | Protein kinase activity                                                                               |
|                         | GO:0005524     | ATP binding                                                                                           |
|                         | GO:0005529     | Carbohydrate binding                                                                                  |
|                         | GO:0006468     | Protein phosphorylation                                                                               |
| <i>Phvul.011G044500</i> | GO:0006694     | Steroid biosynthetic process                                                                          |
|                         | GO:0016616     | Oxidoreductase activity, acting on the CH-OH group of donors, NAD or NADP as acceptor                 |
|                         | GO:0044237     | Cellular metabolic process                                                                            |
|                         | GO:0050662     | Coenzyme binding                                                                                      |
| <i>Phvul.011G147800</i> | GO:0003677     | DNA binding                                                                                           |
|                         | GO:0006355     | Regulation of transcription, DNA-templated                                                            |
| <i>Phvul.011G150400</i> | GO:0004672     | Protein kinase activity                                                                               |
|                         | GO:0005524     | ATP binding                                                                                           |
|                         | GO:0005529     | Carbohydrate binding                                                                                  |
|                         | GO:0006468     | Protein phosphorylation                                                                               |
| <i>Phvul.011G179600</i> | GO:0008270     | Zinc ion binding                                                                                      |
| <i>Phvul.011G214400</i> | GO:0004672     | Protein kinase activity                                                                               |
|                         | GO:0005524     | ATP binding                                                                                           |
|                         | GO:0005529     | Carbohydrate binding                                                                                  |
|                         | GO:0006468     | Protein phosphorylation                                                                               |

**Table S56. UHPLC-MS/MS identification of flavonols and isoflavones in acidified methanolic extracts of leaves sampled from CBB-resistant and CBB-susceptible *P. vulgaris* leaves.**

| Compound                           | Chemical Formula                                | Retention Time (min) | Parent Ion [M-H] <sup>-</sup> | Fragment Ion(s) [M-H] <sup>-</sup>     |
|------------------------------------|-------------------------------------------------|----------------------|-------------------------------|----------------------------------------|
| Quercetin rutinoside-xyloside (1)  | C <sub>32</sub> H <sub>38</sub> O <sub>20</sub> | 22.46                | 741.1891                      | 609.1483, 301.0355, 300.0278, 178.9989 |
| Quercetin glucoside-xyloside (1)   | C <sub>26</sub> H <sub>28</sub> O <sub>16</sub> | 22.7                 | 595.1309                      | 595.1312, 463.0536, 301.0357, 300.0279 |
| Quercetin glucuronide-xyloside     | C <sub>26</sub> H <sub>26</sub> O <sub>17</sub> | 22.86                | 609.11                        | 301.0353, 300.0276, 178.9984, 151.0039 |
| Quercetin glucoside-xyloside (2)   | C <sub>26</sub> H <sub>28</sub> O <sub>16</sub> | 22.9                 | 595.1309                      | 595.1309, 463.0536, 301.0356, 300.0278 |
| Kaempferol diglucoside (1)         | C <sub>27</sub> H <sub>30</sub> O <sub>16</sub> | 23.42                | 609.1466                      | 609.1465, 285.0399, 284.0324           |
| Quercetin rutinoside-xyloside (2)  | C <sub>32</sub> H <sub>38</sub> O <sub>20</sub> | 23.45                | 741.1891                      | 741.1905, 301.0363, 300.0274           |
| Kaempferol diglucoside (2)         | C <sub>27</sub> H <sub>30</sub> O <sub>16</sub> | 23.68                | 609.1466                      | 609.1465, 285.0399, 284.0324           |
| Quercetin dixyloside (1)           | C <sub>25</sub> H <sub>26</sub> O <sub>15</sub> | 24.67                | 565.1202                      | 565.1201, 301.0354, 300.0275, 178.9984 |
| Kaempferol rutinoside-xyloside     | C <sub>32</sub> H <sub>38</sub> O <sub>19</sub> | 24.71                | 725.1945                      | 725.1941, 593.1503, 285.0403, 284.0325 |
| Quercetin 3- <i>O</i> -galactoside | C <sub>21</sub> H <sub>20</sub> O <sub>12</sub> | 24.74                | 463.0882                      | 463.0875, 301.0349, 300.0273, 255.0286 |

Table S56 continued

| Compound                           | Chemical Formula                                | Retention Time (min) | Parent Ion [M-H] <sup>-</sup> | Fragment Ion(s) [M-H] <sup>-</sup>              |
|------------------------------------|-------------------------------------------------|----------------------|-------------------------------|-------------------------------------------------|
| Quercetin 3- <i>O</i> -glucuronide | C <sub>21</sub> H <sub>18</sub> O <sub>13</sub> | 24.91                | 477.0674                      | 301.0353,<br>178.9987,<br>151.0038              |
| Quercetin 3- <i>O</i> -glucoside   | C <sub>21</sub> H <sub>20</sub> O <sub>12</sub> | 24.97                | 463.0882                      | 463.0880,<br>301.0352,<br>300.0274,<br>271.0250 |
| Quercetin 3- <i>O</i> -rutinoside  | C <sub>27</sub> H <sub>30</sub> O <sub>16</sub> | 25.01                | 609.1461                      | 609.1465,<br>301.0352,<br>300.0274,<br>178.9977 |
| Kaempferol glucoside-xyloside      | C <sub>32</sub> H <sub>38</sub> O <sub>19</sub> | 25.24                | 579.1349                      | 579.1351,<br>447.0923,<br>285.0403,<br>284.0326 |
| Quercetin dixyloside (2)           | C <sub>25</sub> H <sub>26</sub> O <sub>15</sub> | 25.28                | 565.1202                      | 565.1194,<br>301.0350,<br>300.0275              |
| Quercetin xyloside                 | C <sub>20</sub> H <sub>18</sub> O <sub>11</sub> | 25.59                | 433.0779                      | 433.0747,<br>301.0352,<br>300.0276,<br>271.0612 |
| Isorhamnetin glucoside-xyloside    | C <sub>27</sub> H <sub>30</sub> O <sub>16</sub> | 25.63                | 609.1454                      | 609.1470,<br>315.0512,<br>314.0432,<br>300.0276 |
| Kaempferol glucuronide             | C <sub>21</sub> H <sub>18</sub> O <sub>12</sub> | 27.34                | 461.0729                      | 285.0403,<br>113.0247,<br>85.0596,<br>59.0136   |
| Kaempferol rutinoside              | C <sub>27</sub> H <sub>30</sub> O <sub>15</sub> | 27.53                | 593.1512                      | 593.1514,<br>285.0404,<br>284.0325              |
| Isorhamnetin glucuronide           | C <sub>22</sub> H <sub>20</sub> O <sub>13</sub> | 28.16                | 491.0832                      | 315.0512,<br>300.0275,<br>113.0248,<br>85.0297  |
| Daidzein                           | C <sub>15</sub> H <sub>10</sub> O <sub>4</sub>  | 28.6                 | 253.0506                      | 253.0510,<br>224.0482,<br>209.0612              |

Table S56 continued

| Compound                | Chemical Formula                               | Retention Time (min) | Parent Ion [M-H] <sup>-</sup> | Fragment Ion(s) [M-H] <sup>-</sup>              |
|-------------------------|------------------------------------------------|----------------------|-------------------------------|-------------------------------------------------|
| Genistein               | C <sub>15</sub> H <sub>10</sub> O <sub>5</sub> | 31.59                | 269.0451                      | 269.0457,<br>224.0475,<br>133.0293              |
| Coumestrol <sup>1</sup> | C <sub>15</sub> H <sub>8</sub> O <sub>5</sub>  | 33.86                | 267.0299                      | 267.0299,<br>266.0220,<br>239.0351,<br>211.0403 |
| Phaseollinisoflavan     | C <sub>20</sub> H <sub>20</sub> O <sub>4</sub> | 38.2                 | 323.1295                      | 323.1292,<br>282.9808,<br>201.0924,<br>135.0454 |

<sup>1</sup> Identified via co-elution with an authentic coumestrol standard. All other compounds were identified on the basis of their MS parent and fragment ion data and compared to a MS/MS library for flavonols and isoflavones, and the scientific literature as described in section 4.5 of the Materials and Methods.

Figure S1. Negative ion UHPLC-MS/MS analysis of the leaves of the CBB-resistant RIL following *X. axonopodis* inoculation detected a peak (retention time = 38.2 min) with MS/MS fragmentation data matching phaseollinisoflavan

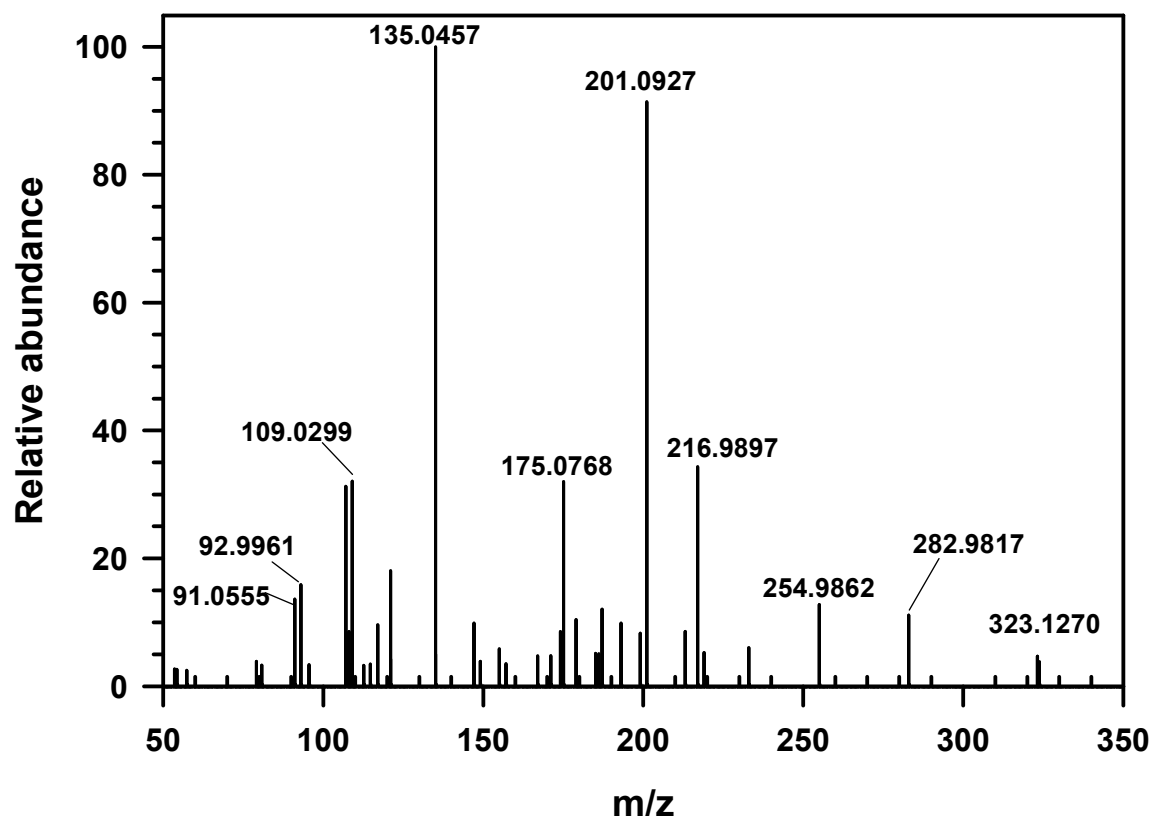

Supplement: s1 [file s1]
